# Supplementary material
Source: PubMed Central journal article supplement (PMC7604886)

# Western Blot Overview

## **Cardiomyocyte NLRP3-inflammasome and Calcium/Calmodulin-dependent Kinase II Signaling Create a Cellular Substrate for Post-operative Atrial Fibrillation**

Jordi Heijman, PhD<sup>#</sup>; Phina Muna, PhD<sup>#</sup>; Tina Veleva, MD;  
Cristina E. Molina, PhD; Henry Sutanto, MD, MSc; Marcel  
Tekook, PhD; Qionglng Wang, PhD; Issam H. Abu-Taha, PhD;  
Marcel Gorka; Stephan Künzel, MD; Ali El-Armouche, MD;  
Hermann Reichenspurner, MD, PhD; Markus Kamler, MD;  
Viacheslav Nikolaev, PhD; Ursula Ravens, MD; Na Li, PhD;  
Stanley Nattel, MD; Xander H.T. Wehrens, MD, PhD;  
Dobromir Dobrev, MD

**Note:** Given the limited availability of human atrial tissue samples, most gels were physically cut to enable incubation with different antibodies against proteins with distinct molecular weights. These fragments are shown in the subsequent slides. Unless otherwise indicated, samples are loaded in pairs: two Ctl samples followed by two POAF samples, etc. with molecular weight markers in the first and/or last lanes. Only samples that were used in the representative blots and/or quantitative analysis are marked.

Gel 1 / 4

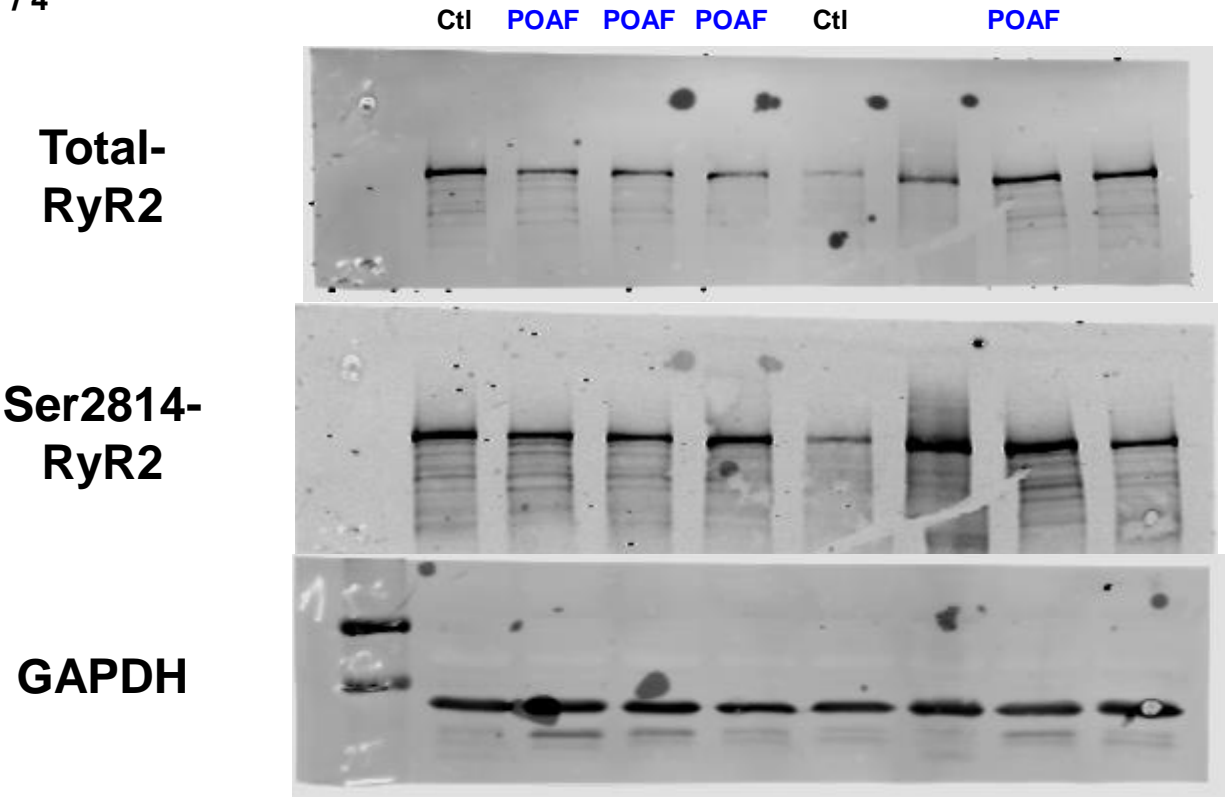

Gel 2 / 4

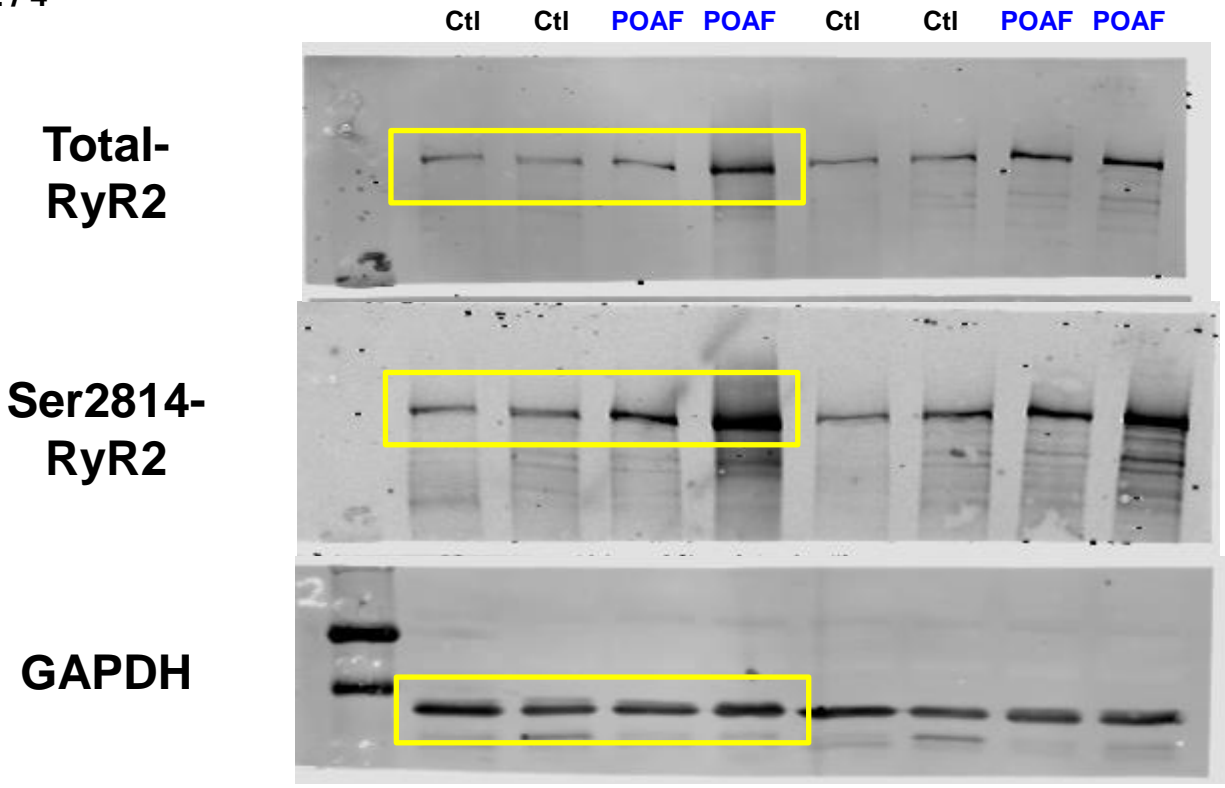

**Figure 4B – Human atrial whole-tissue lysates**

Gel 3 / 4

Ctl Ctl POAF POAF Ctl Ctl POAF POAF

Total-RyR2

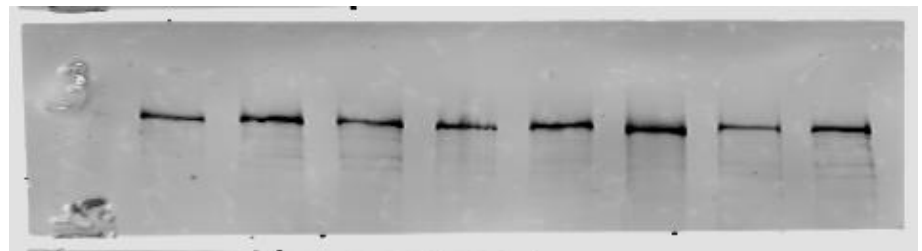

Ser2814-RyR2

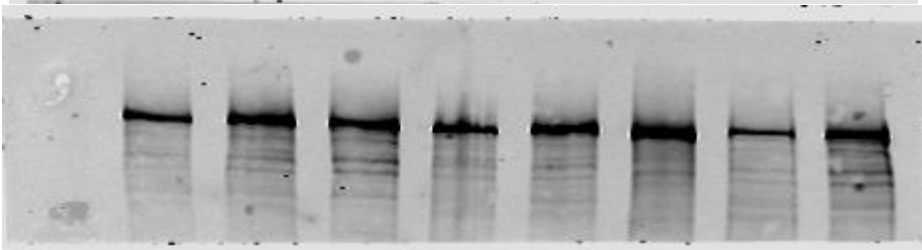

GAPDH

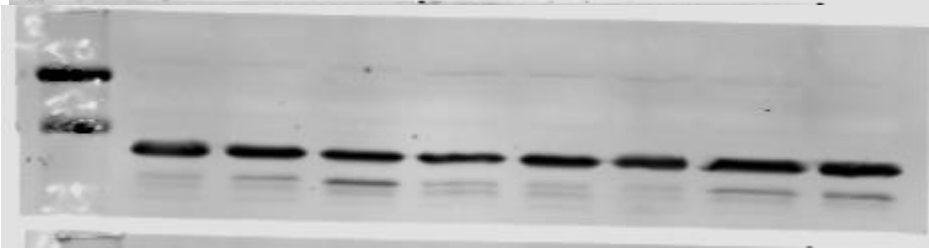

Gel 4 / 4

Ctl

Total-RyR2

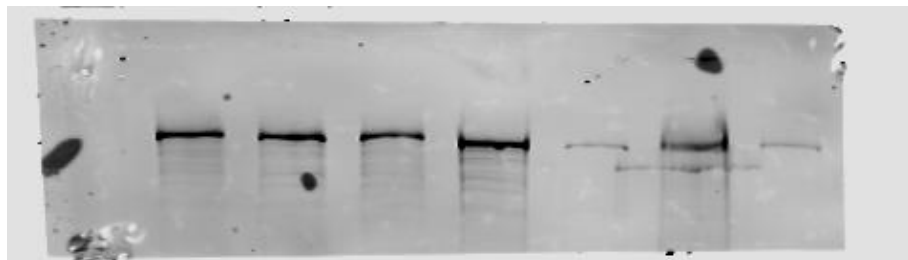

Ser2814-RyR2

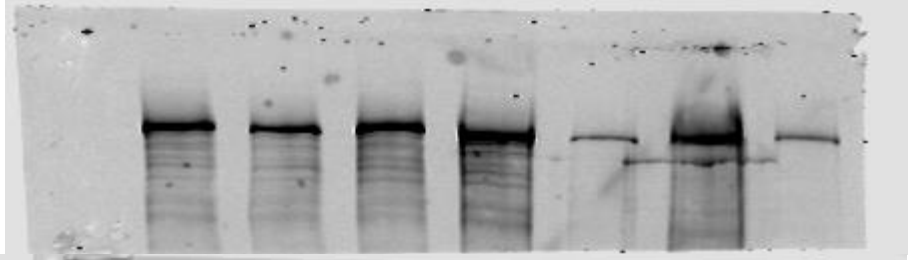

GAPDH

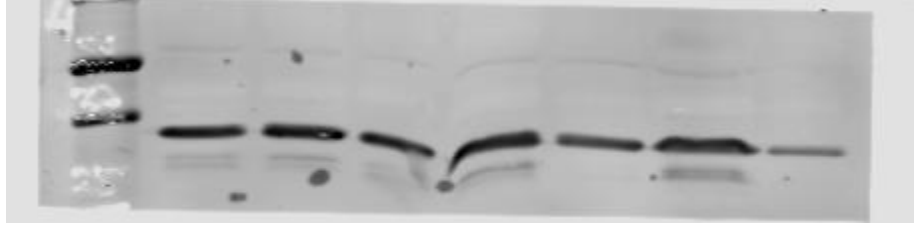

**Figure 4B – Human atrial whole-tissue lysates**

Gel 1 / 3

Ctl Ctl POAF POAF POAF POAF Ctl Ctl POAF POAF Ctl

Total-CaMKII $\delta$

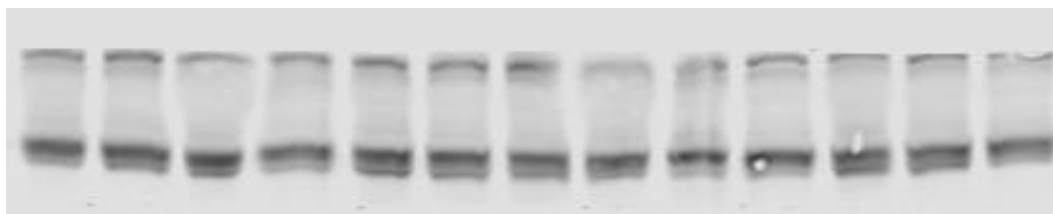

GAPDH

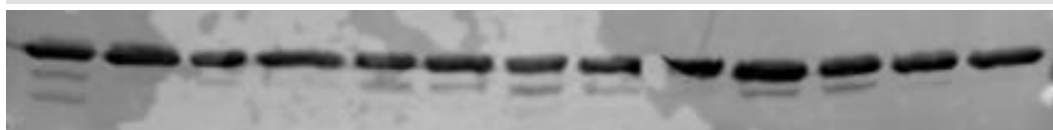

Thr287-CaMKII $\delta$

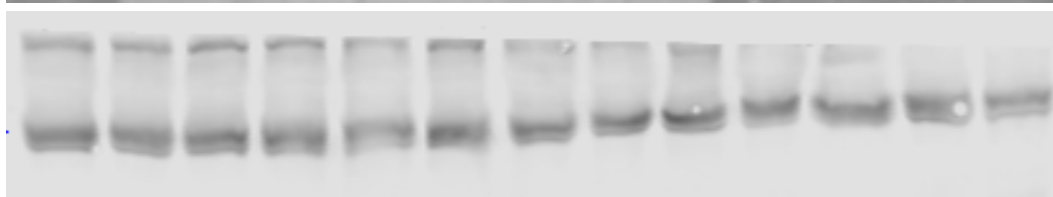

GAPDH

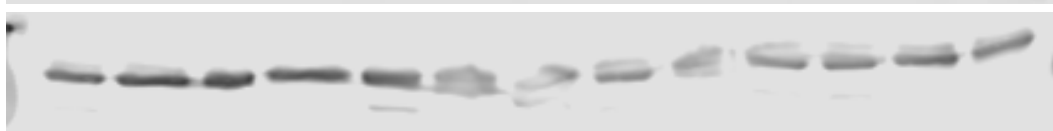

Gel 2 / 3

Ctl Ctl POAF POAF Ctl Ctl POAF

Total-CaMKII $\delta$

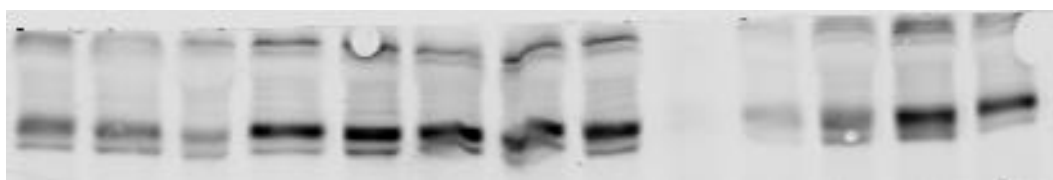

GAPDH

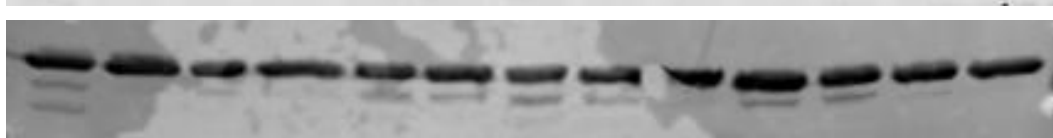

Thr287-CaMKII $\delta$

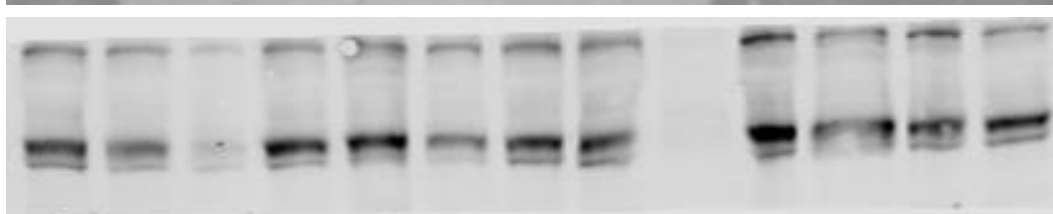

GAPDH

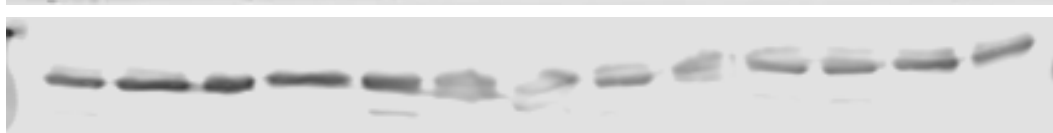

Figure 4B + Online Figure X – Human atrial whole-tissue

Gel 3 / 3

Ctl Ctl POAF POAF

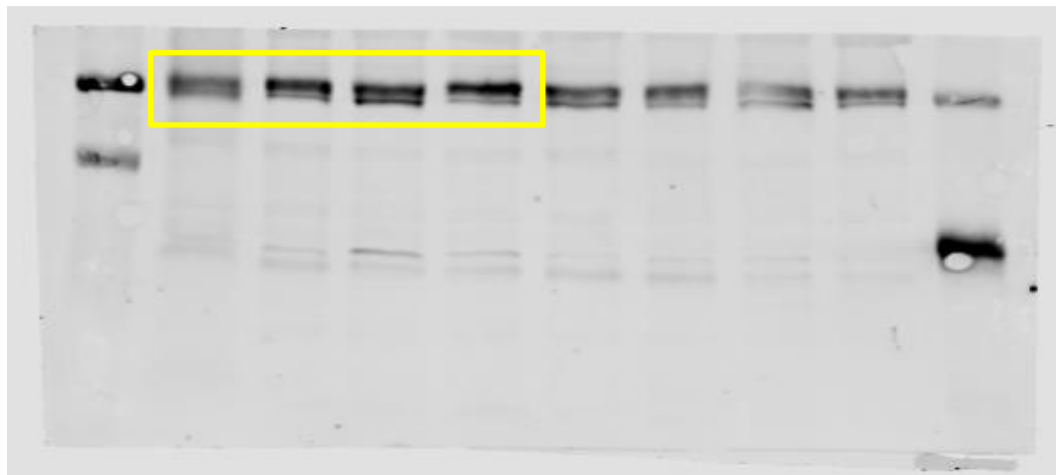

Total-CaMKII $\delta$

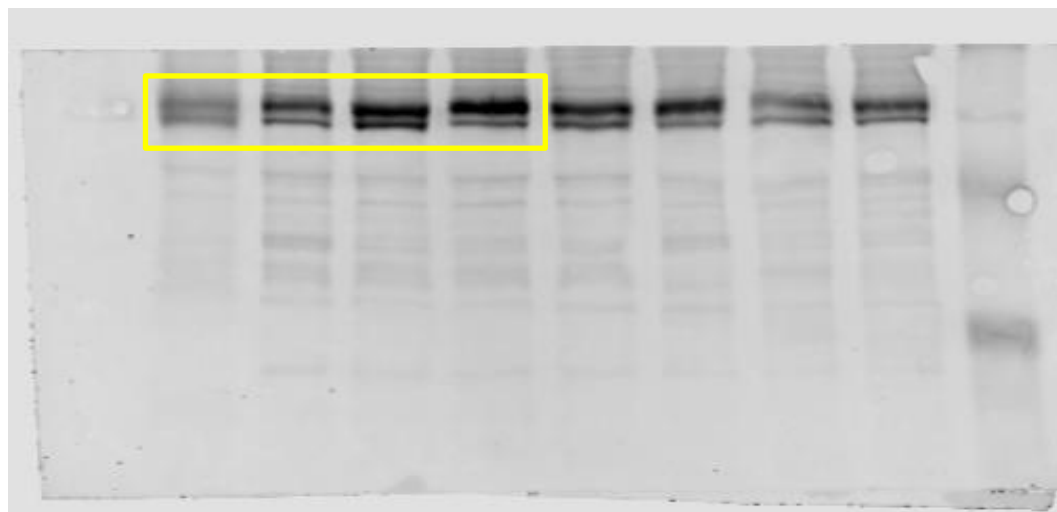

Thr287-CaMKII $\delta$

GAPDH

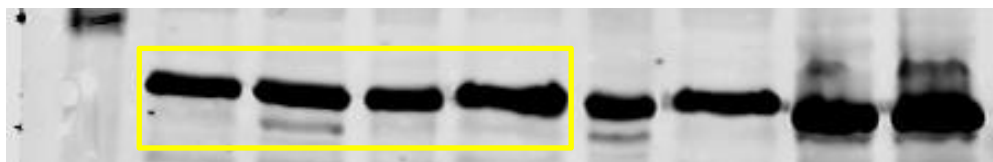

**Figure 4B + Online Figure X – Human atrial whole-tissue**

Gel 1 / 4

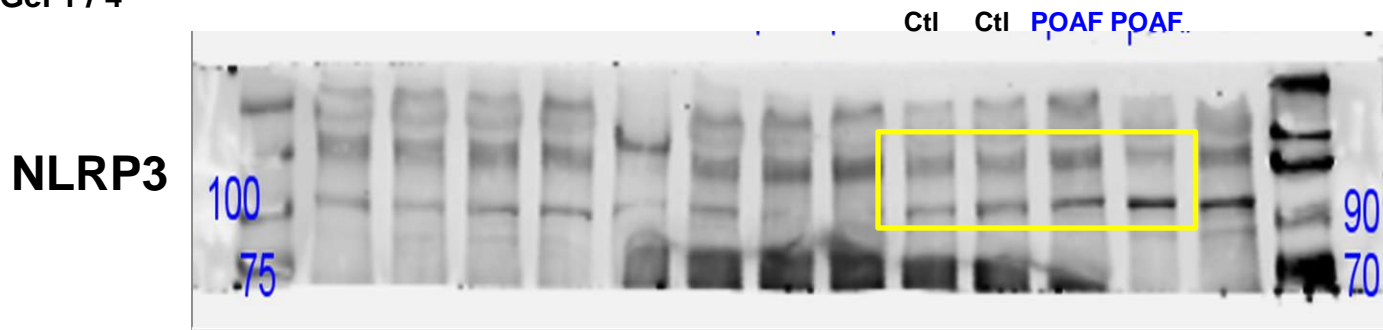

Gel 2 / 4

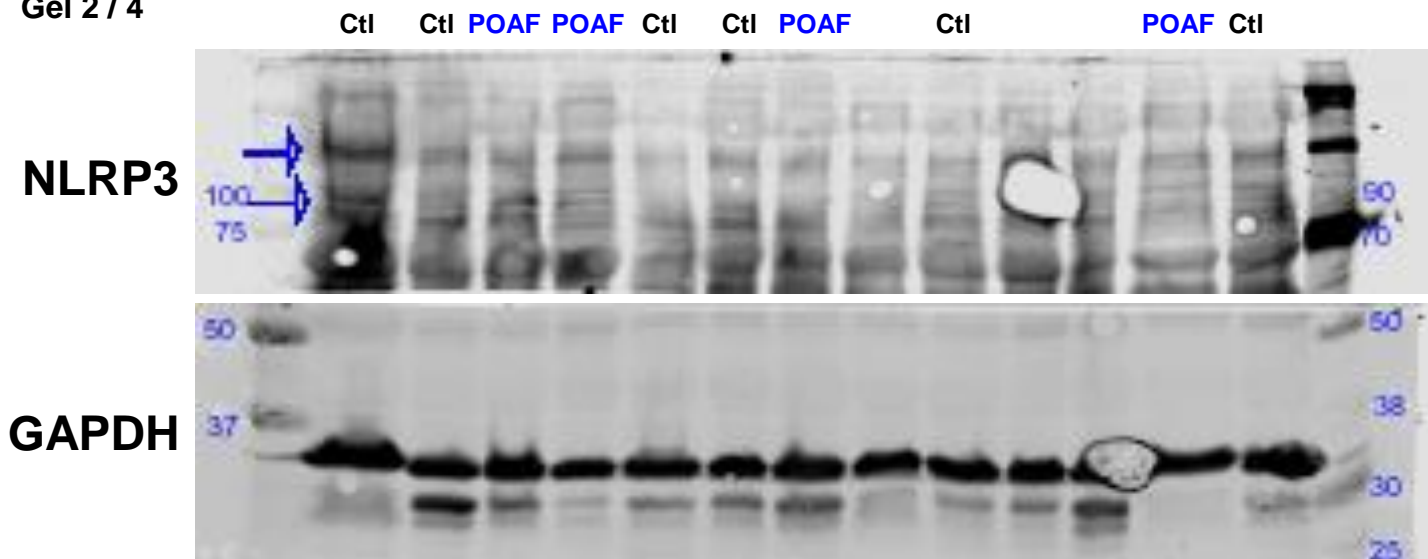

**Figure 5A – Human atrial whole-tissue lysates**

Gel 3 / 4

Ctl POAF POAF POAF Ctl Ctl POAF Ctl Ctl POAF POAF POAF

NLRP3

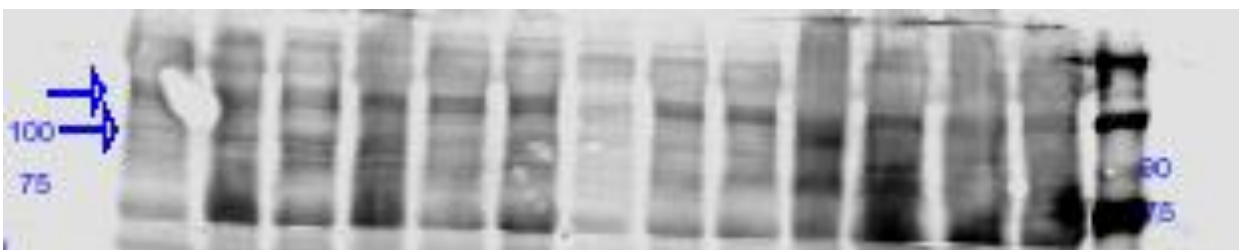

GAPDH

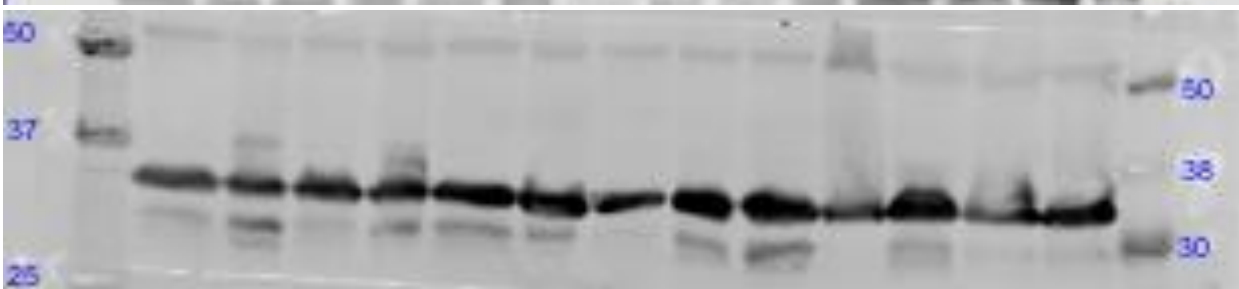

Gel 4 / 4

Ctl POAF POAF Ctl Ctl POAF POAF Ctl Ctl POAF POAF

NLRP3

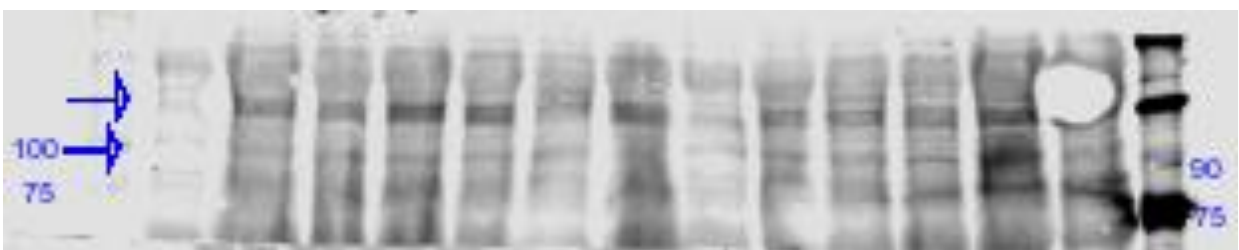

GAPDH

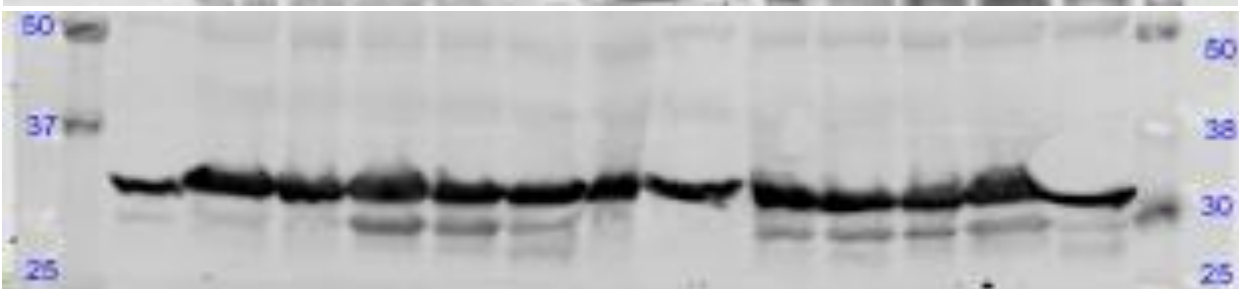

**Figure 5A – Human atrial whole-tissue lysates**

# ASC

Gel 1 / 2

Ctl POAF Ctl Ctl POAF POAF Ctl Ctl POAF POAF Ctl

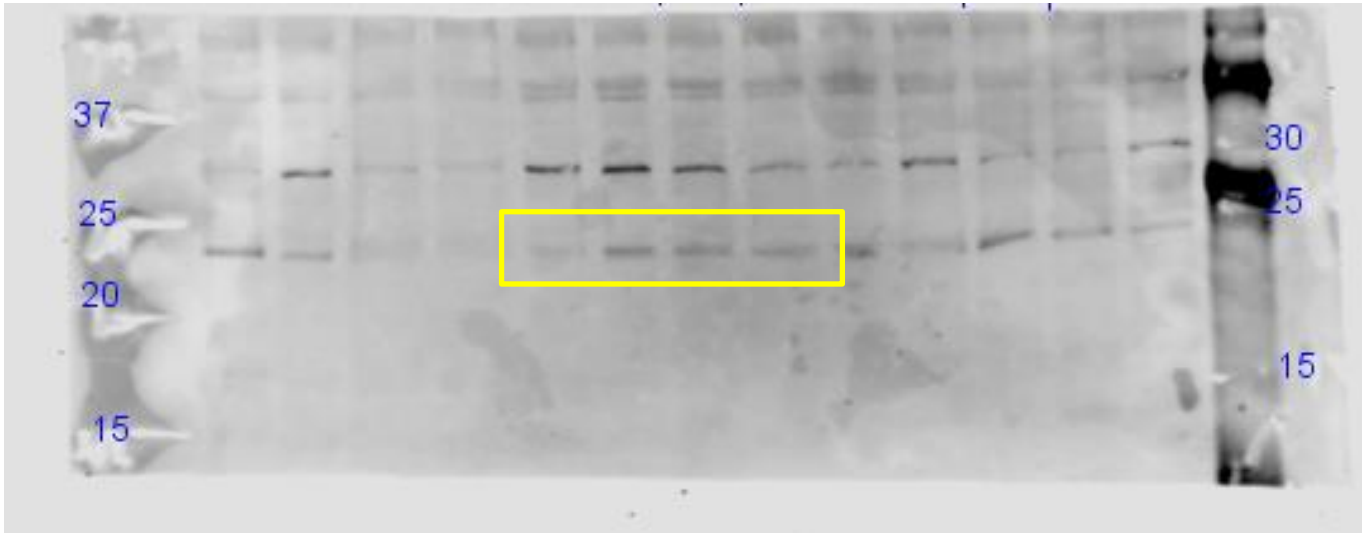

# GAPDH

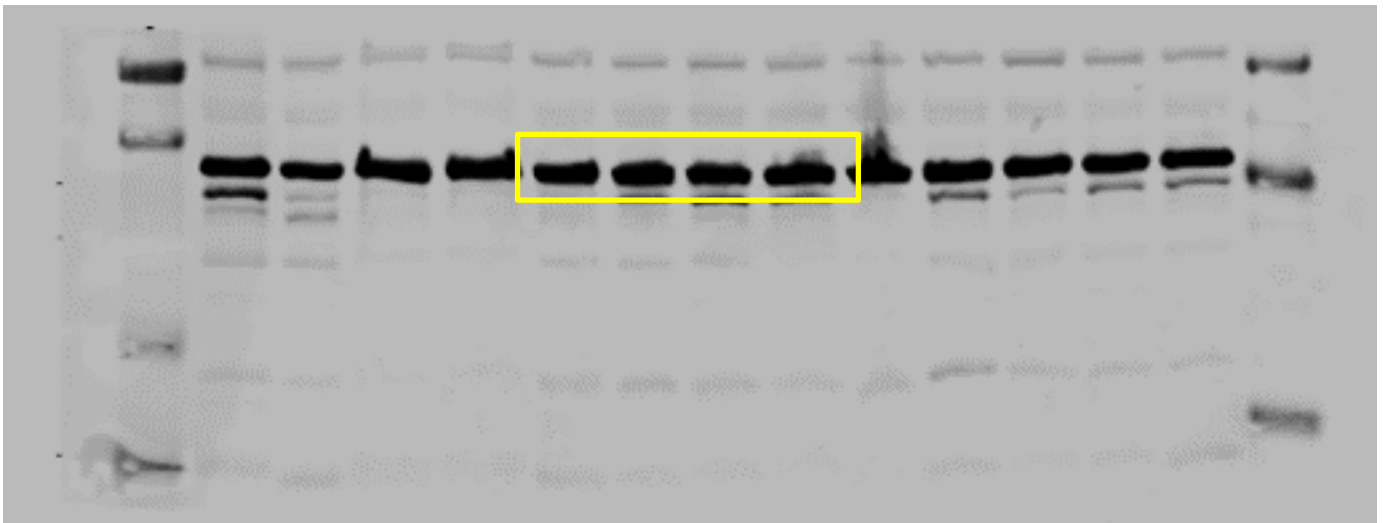

**Figure 5A – Human atrial whole-tissue lysates**



# ASC

Gel 2 / 2

Ctl Ctl POAF POAF POAF POAF Ctl POAF POAF

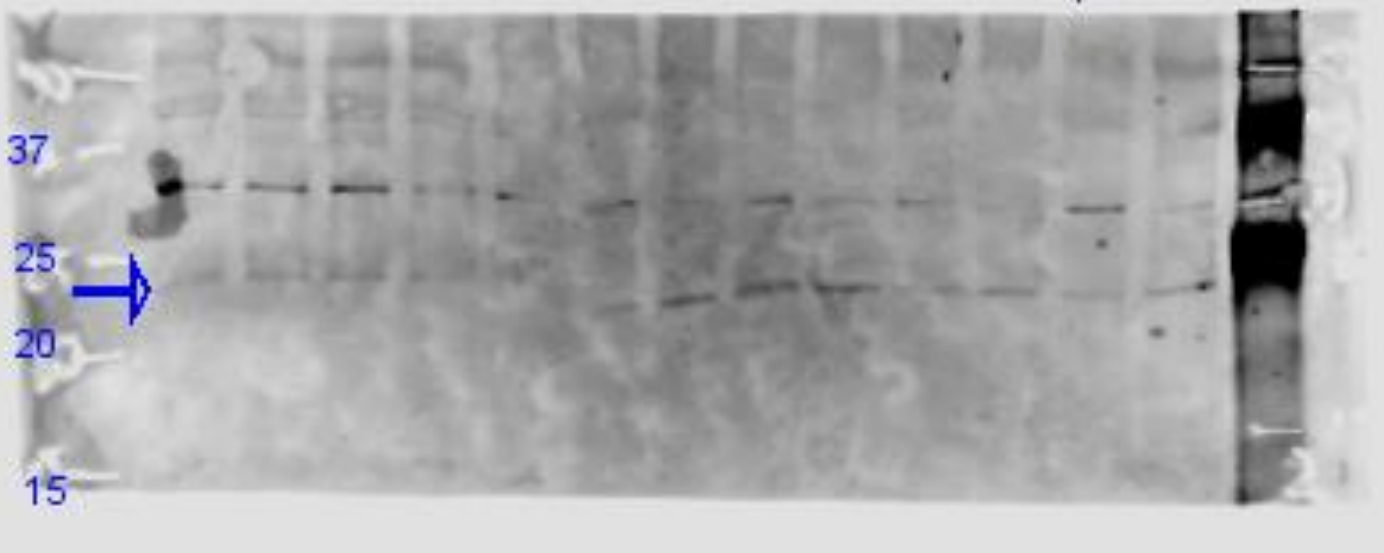

# GAPDH

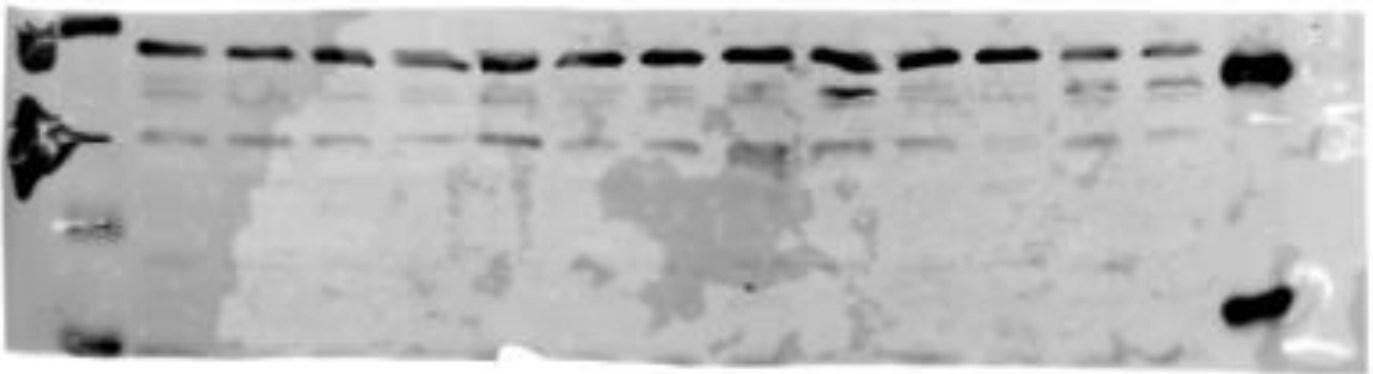

**Figure 5A – Human atrial whole-tissue lysates**

# Pro-Caspase-1

POAF POAF Ctl Ctl

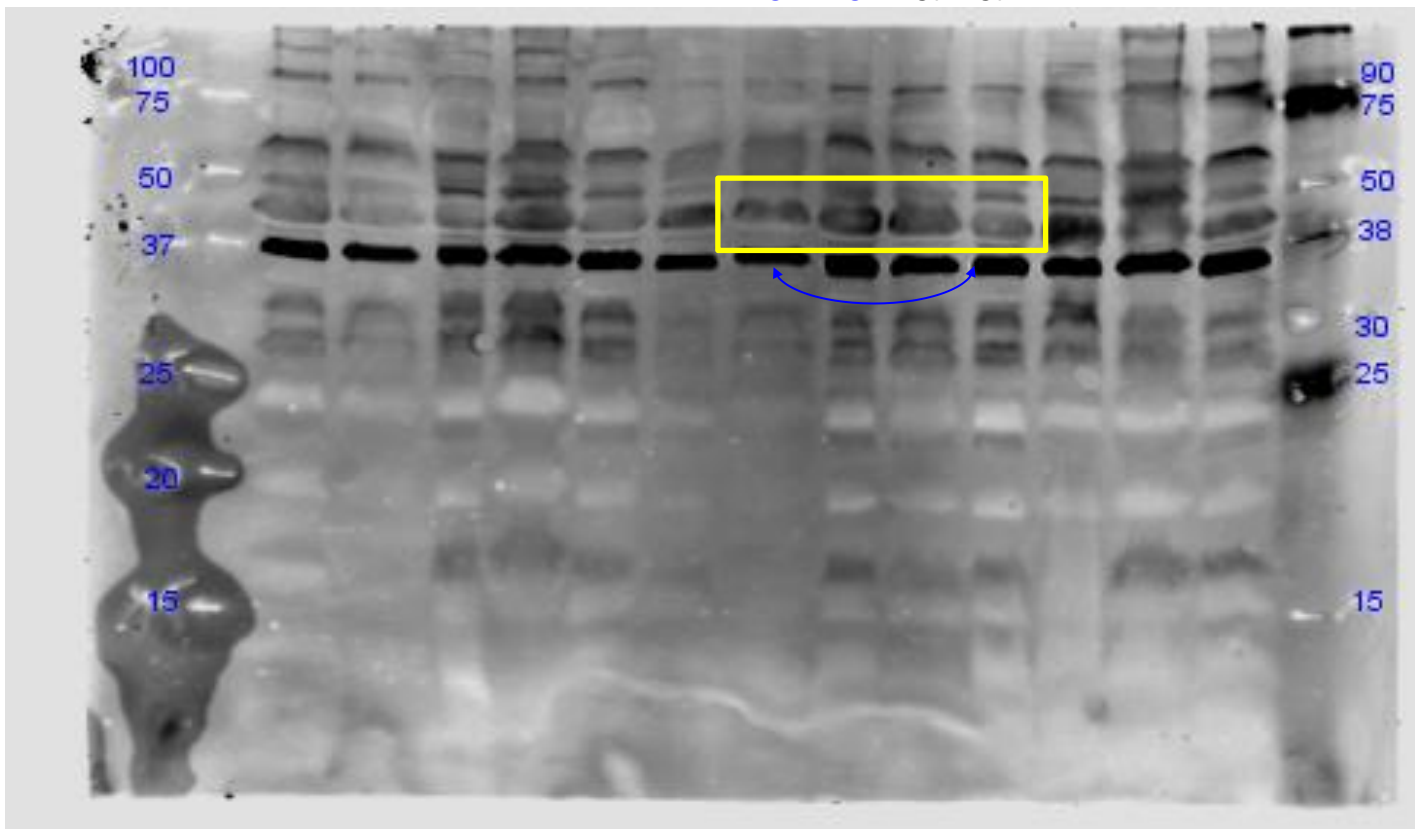

**Figure 5A – Human atrial whole-tissue lysates**

Gel 2 / 3

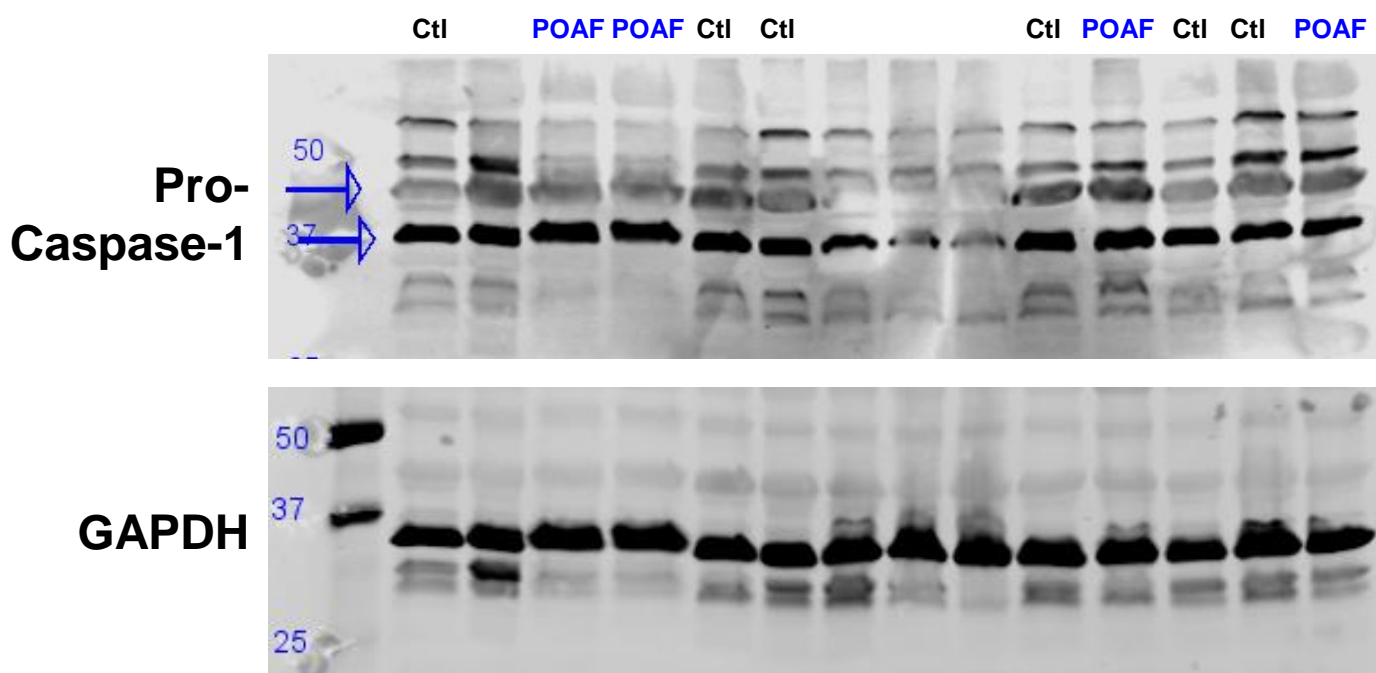

Gel 3 / 3

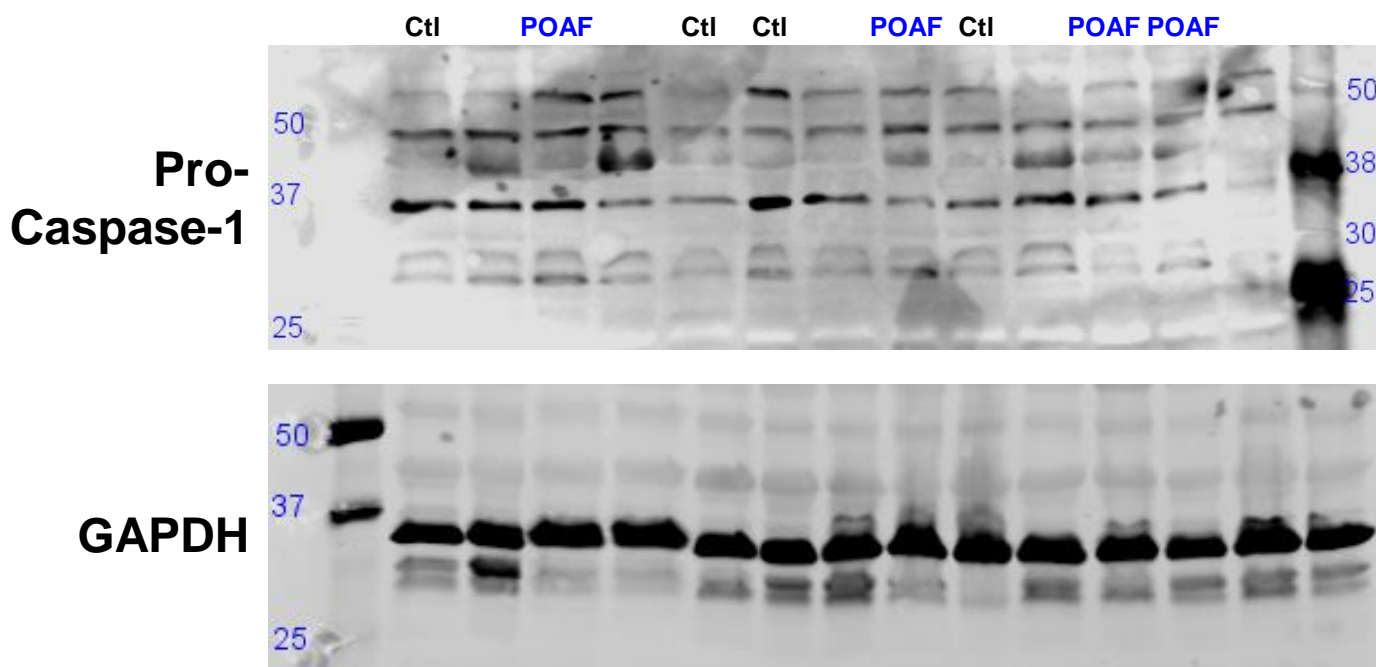

**Figure 5A – Human atrial whole-tissue lysates**

# Caspase-1-p20

POAF POAF Ctl Ctl POAF POAF Ctl Ctl POAF POAF

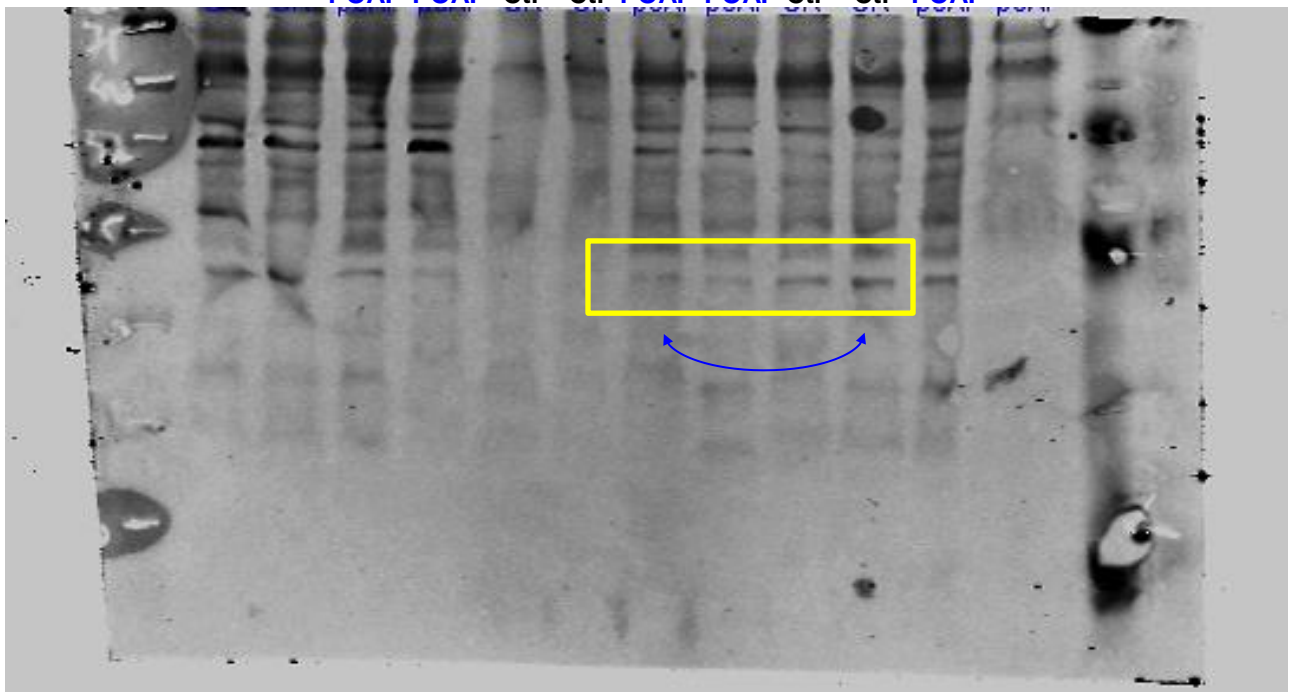

# GAPDH

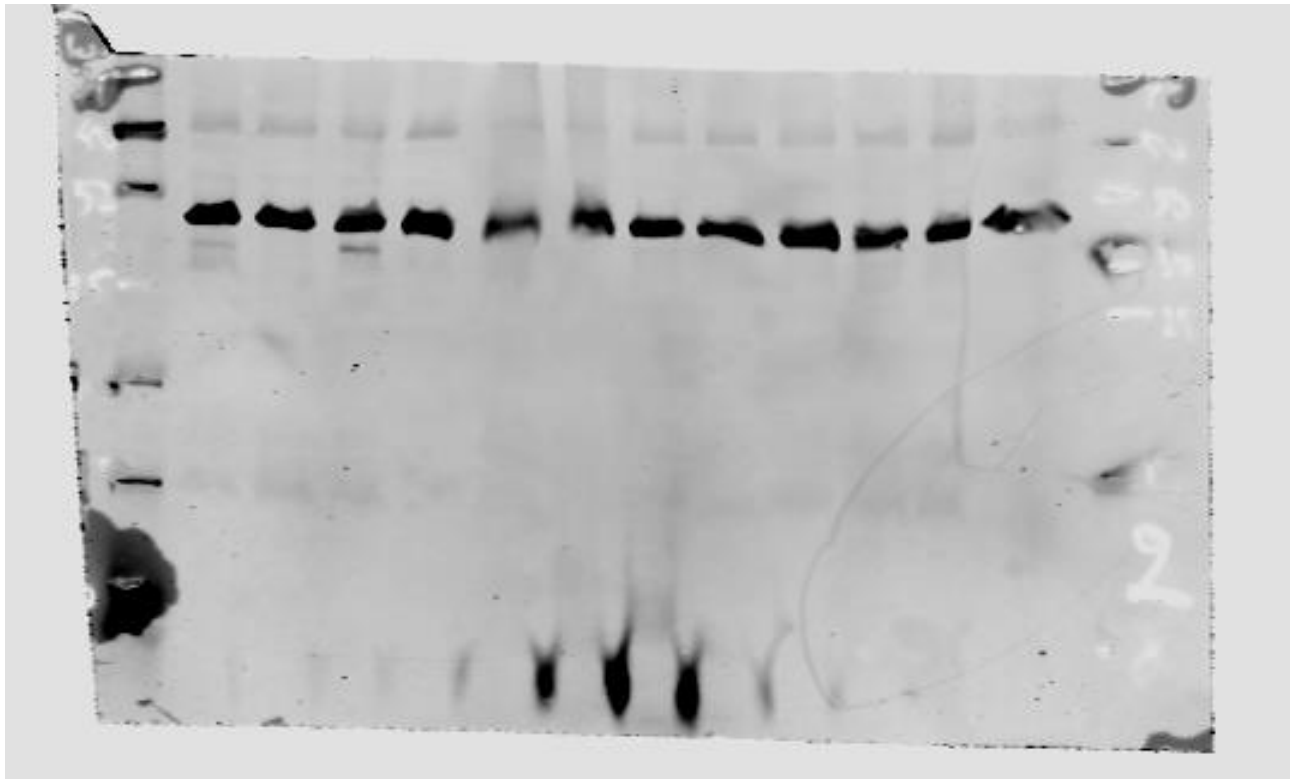

**Figure 5A – Human atrial whole-tissue lysates**

# Gasdermin-D (full-length + N-terminal fragment)

Ctl Ctl POAF POAF Ctl Ctl POAF POAF Ctl POAF POAF

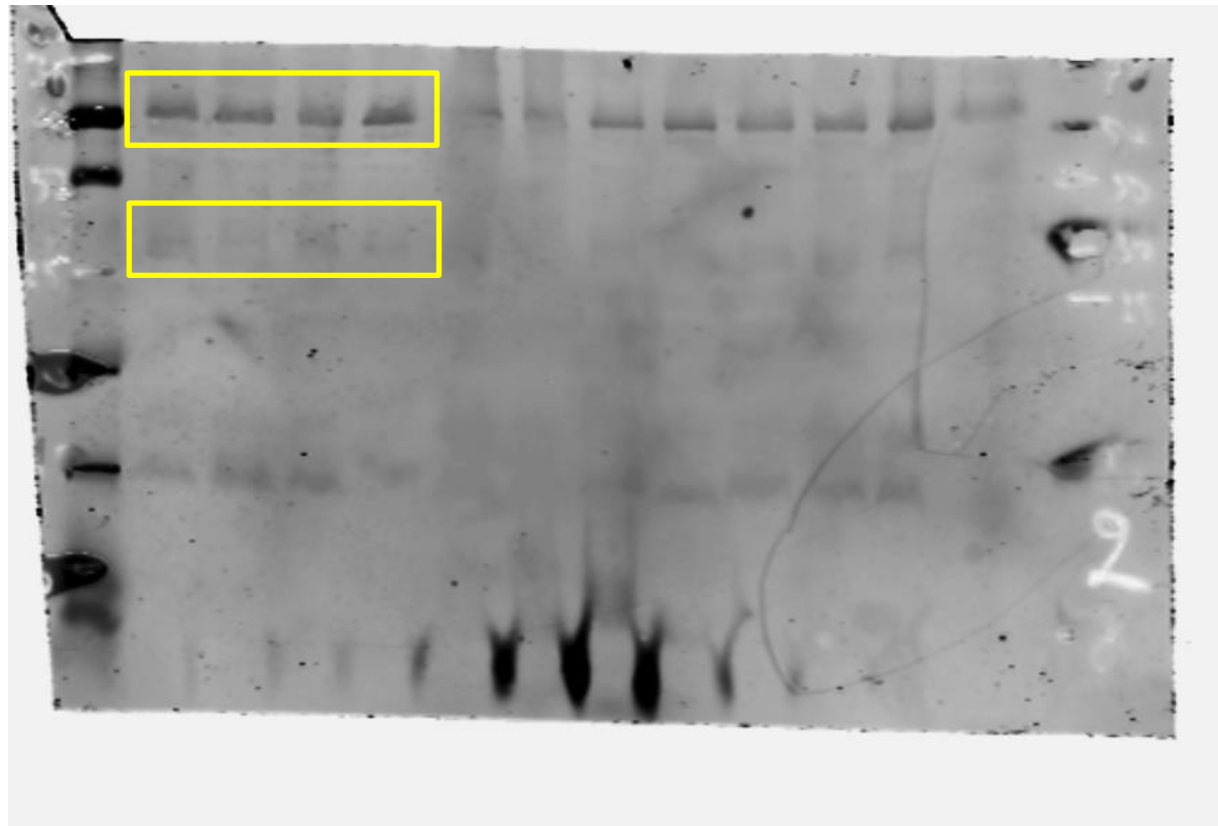

## GAPDH

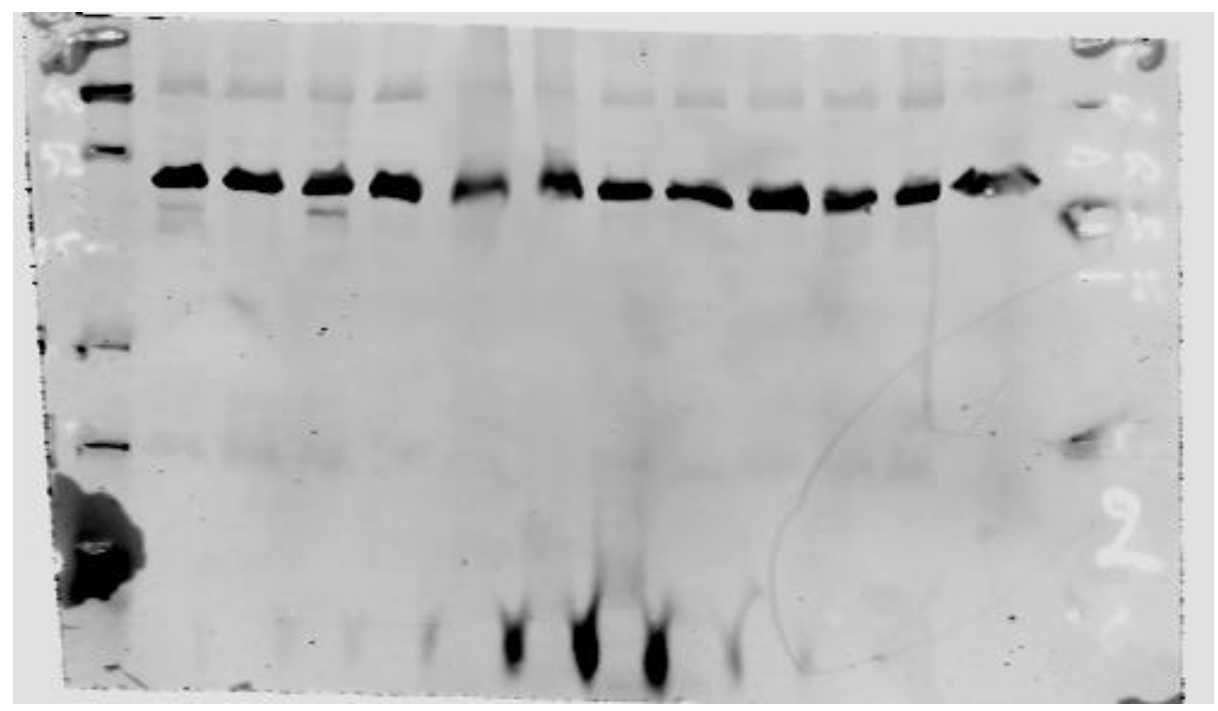

**Figure 5A – Human atrial whole-tissue lysates**

### (Pro-)Interleukin-1 $\beta$

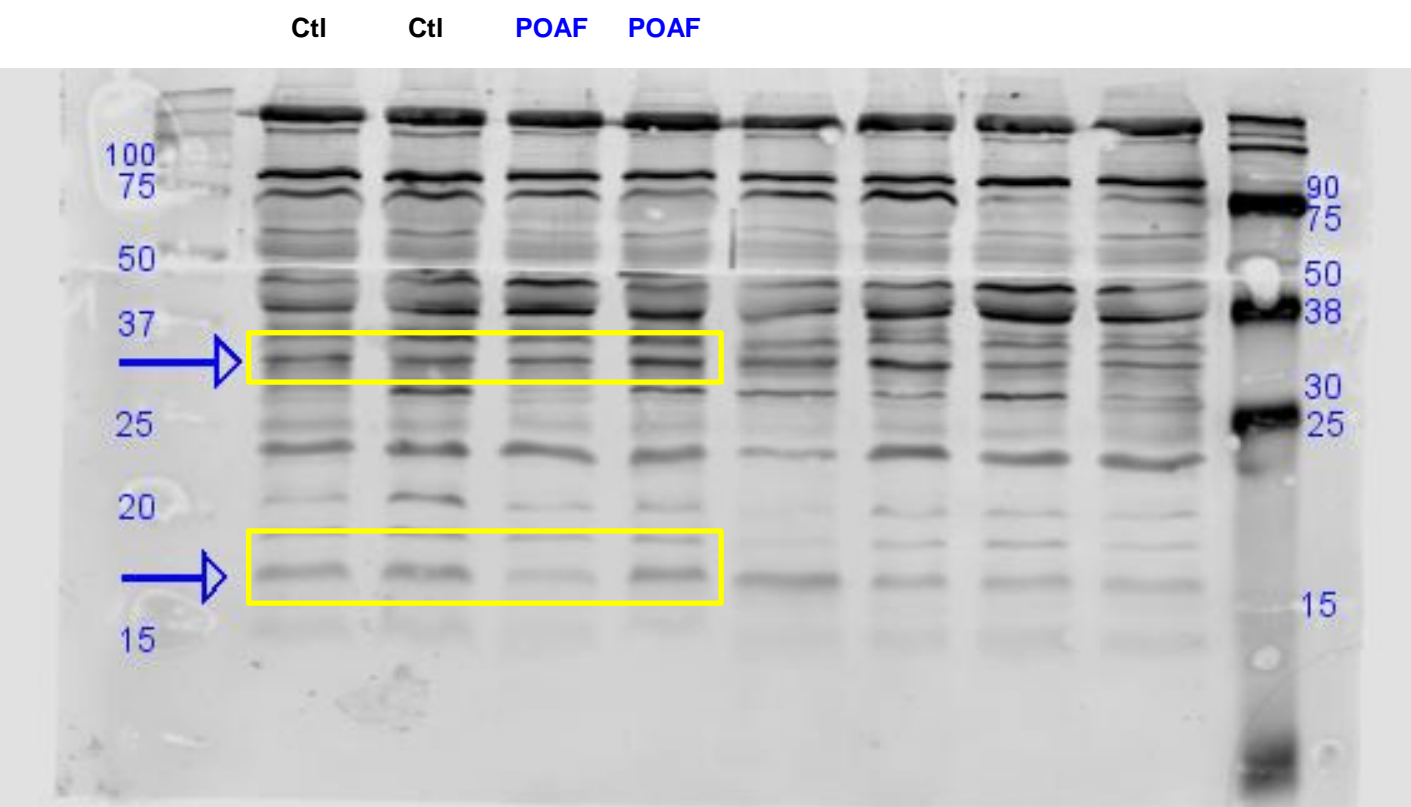

### GAPDH

Ctl Ctl POAF POAF

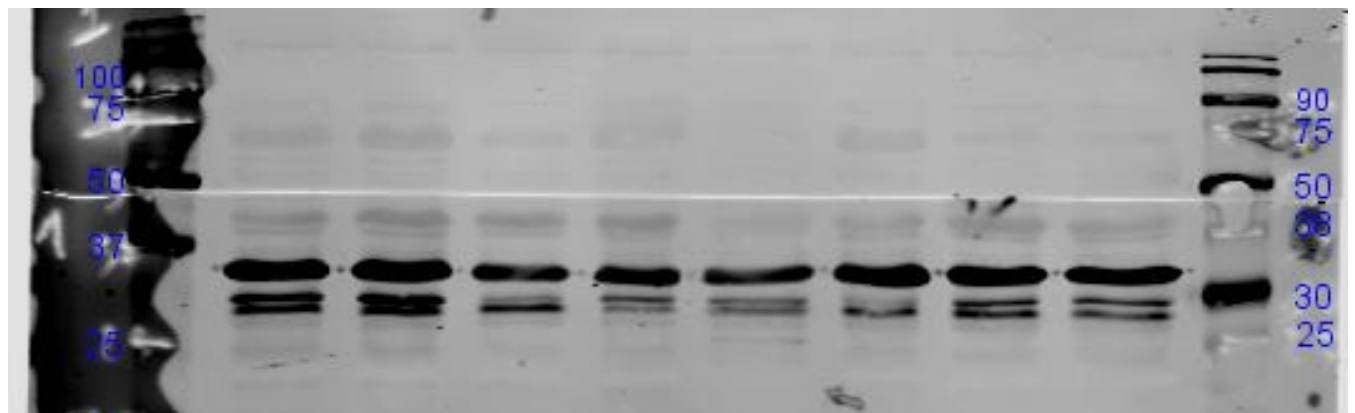

**Figure 5A – Human atrial whole-tissue lysates**

### (Pro-)Interleukin-1 $\beta$

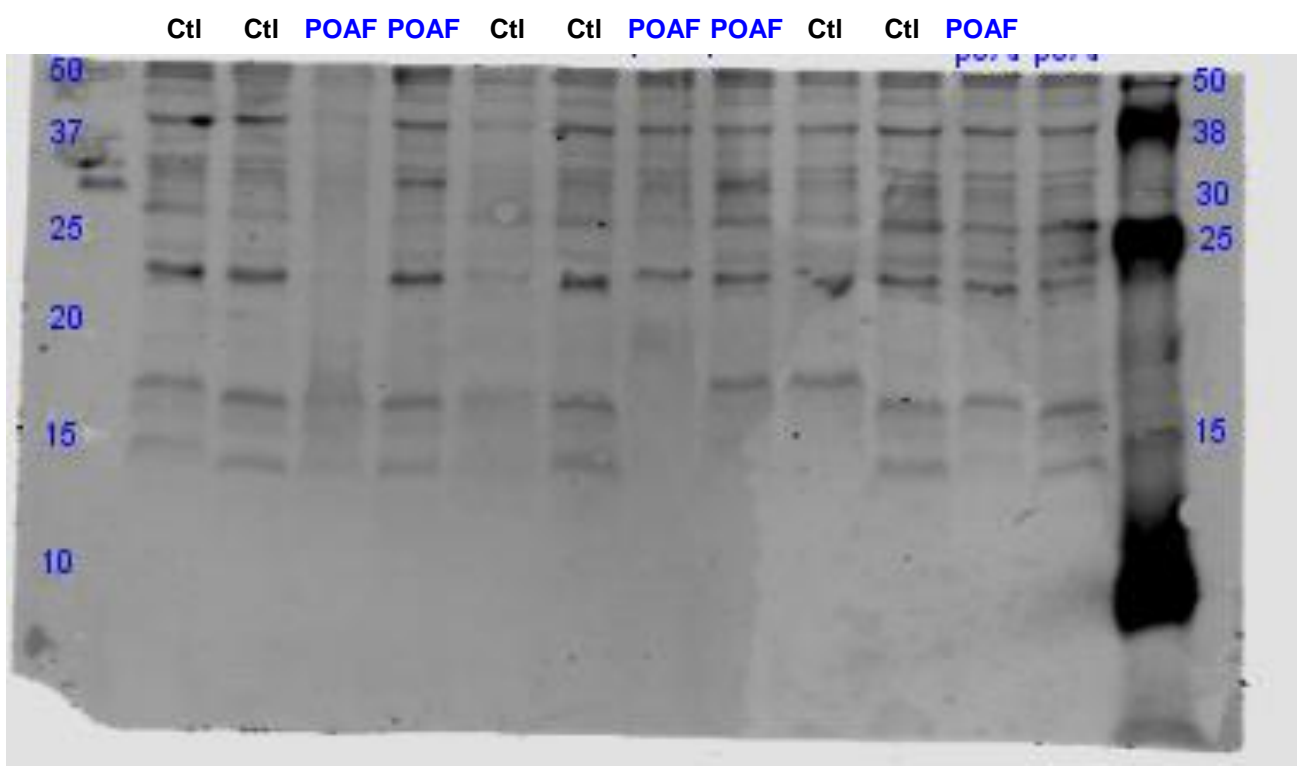

### GAPDH

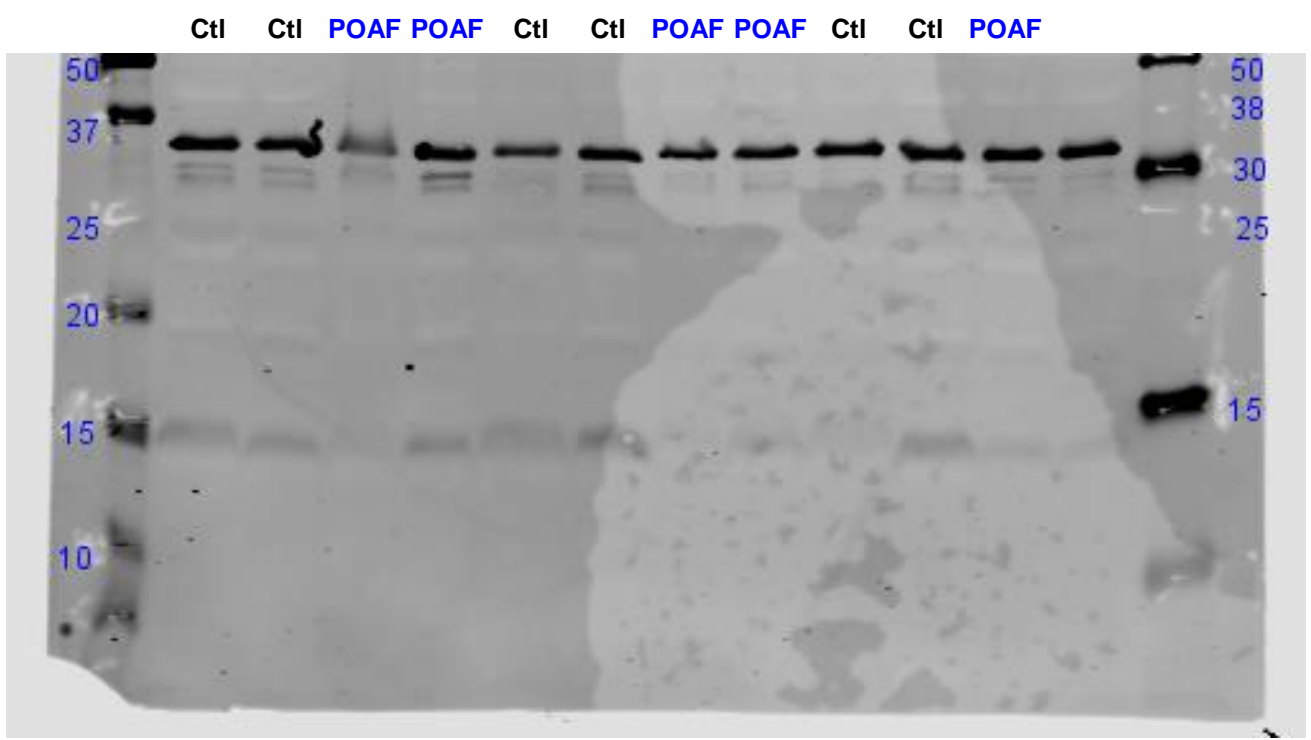

**Figure 5A – Human atrial whole-tissue lysates**

### (Pro-)Interleukin-1 $\beta$

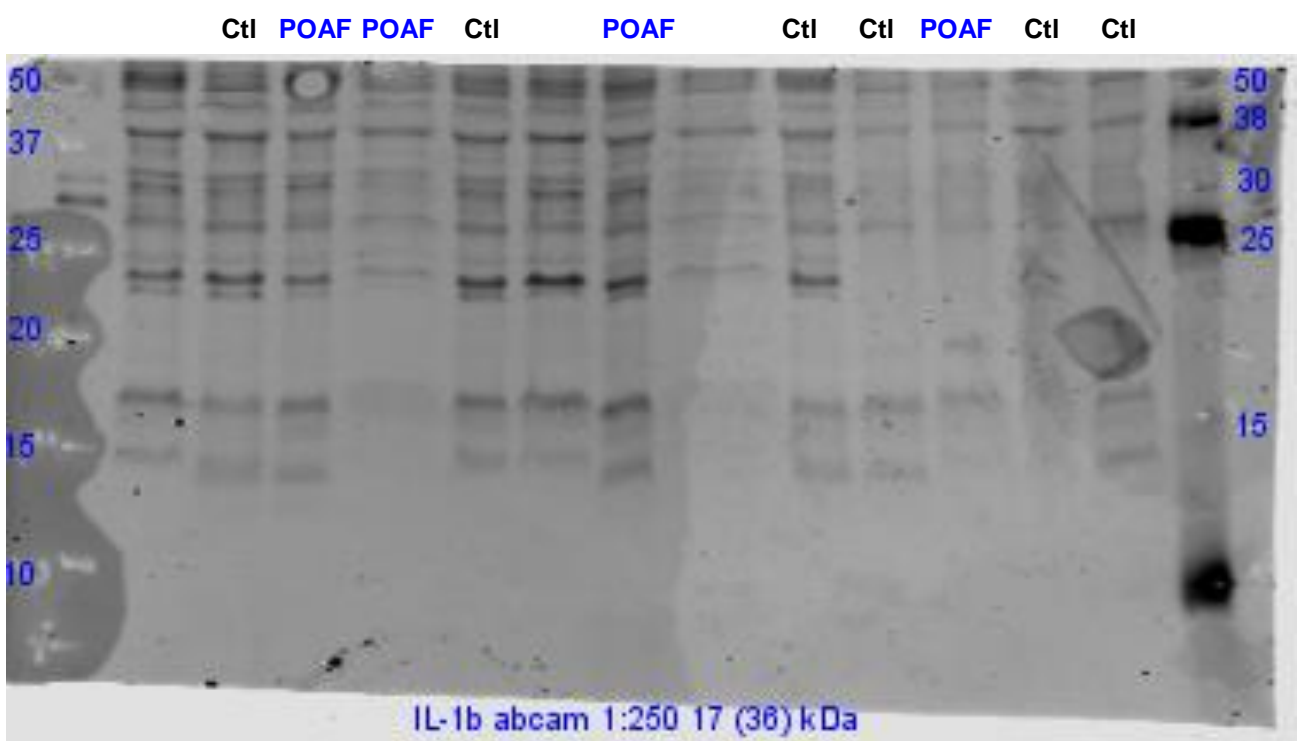

### GAPDH

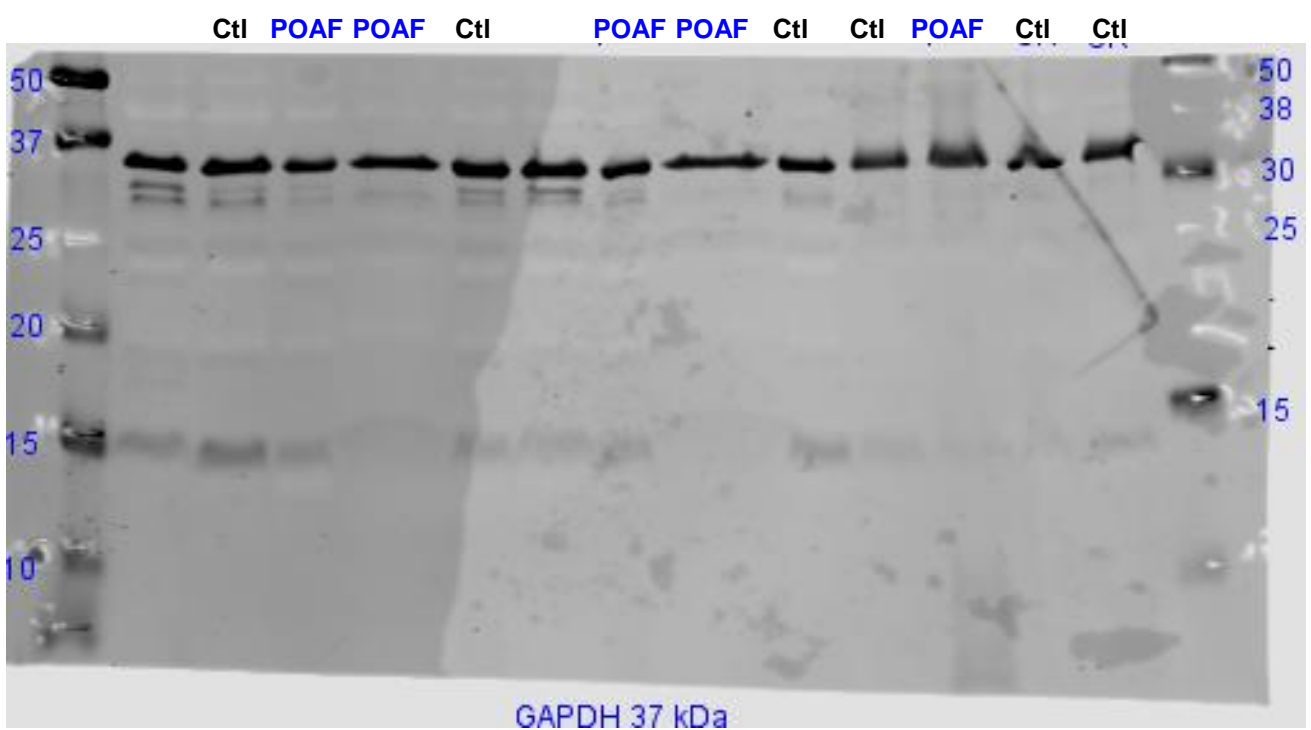

**Figure 5A – Human atrial whole-tissue lysates**



Gel 1 / 3

Ctl Ctl POAF POAF Ctl Ctl POAF POAF Ctl POAF Ctl Ctl POAF

Total-NFκB

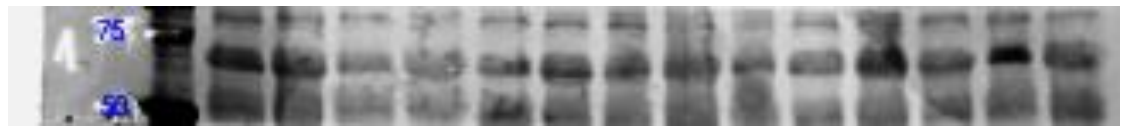

Ser536-NFκB

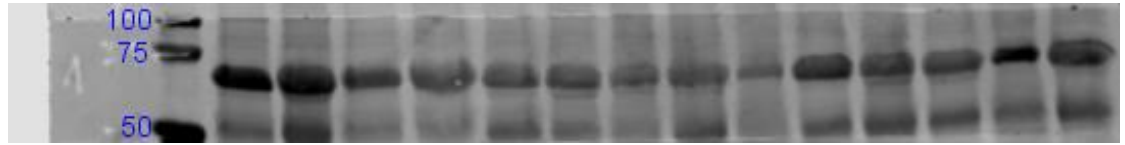

GAPDH

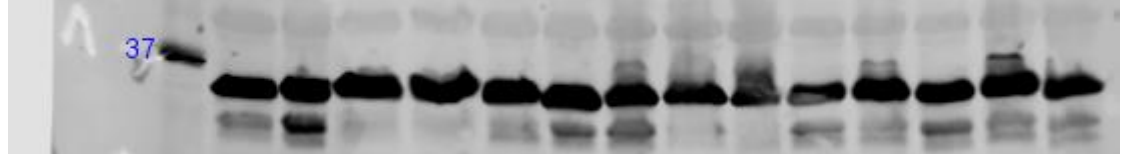

Gel 2 / 3

Ctl Ctl POAF POAF Ctl Ctl POAF POAF Ctl Ctl POAF

Total-NFκB

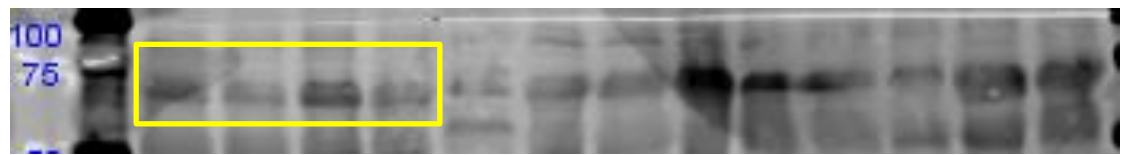

Ser536-NFκB

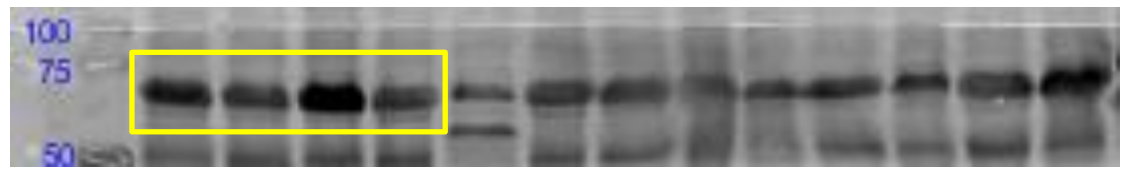

GAPDH

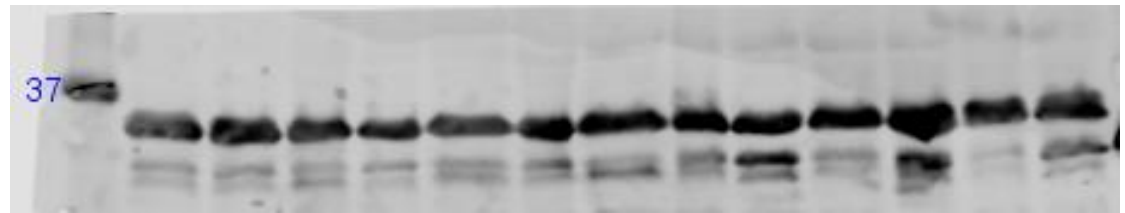

Gel 3 / 3

Ctl Ctl POAF POAF Ctl Ctl Ctl Ctl Ctl Ctl Ctl

Total-NFκB

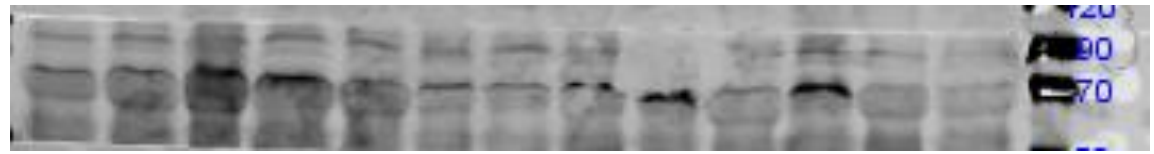

Ser536-NFκB

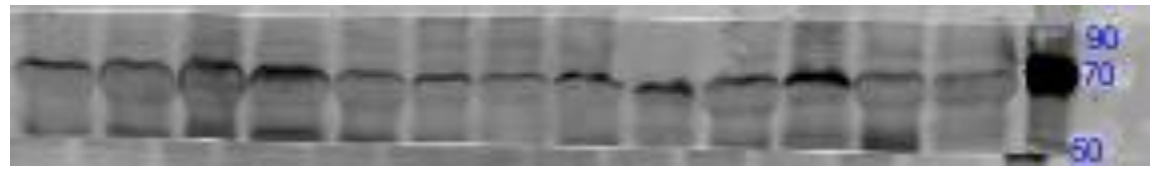

GAPDH

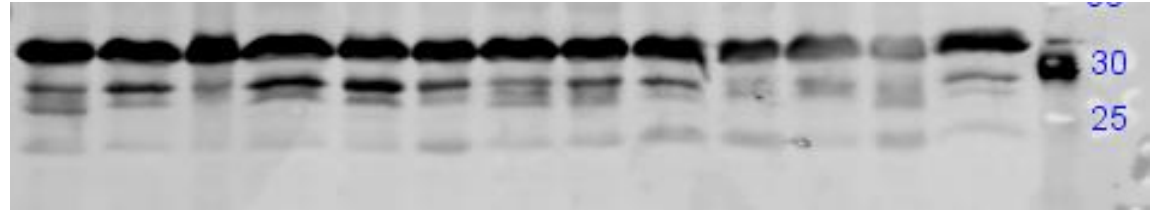

Figure 5B – Human atrial whole-tissue lysates

Gel 1 / 2

### TLR4

Ctl Ctl POAF POAF Ctl POAF POAF Ctl Ctl POAF POAF Ctl

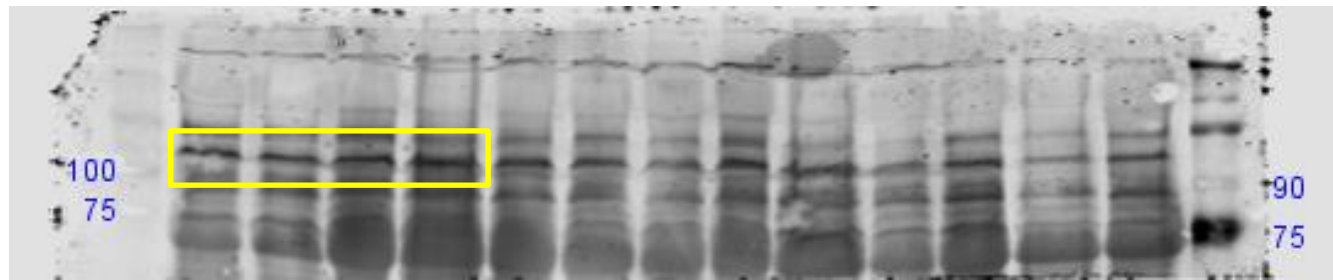

### GAPDH

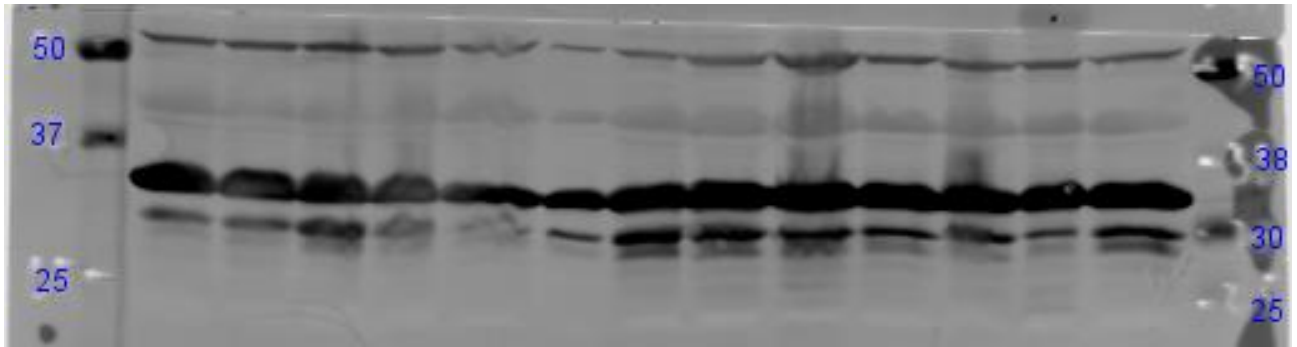

Gel 2 / 2

### TLR4

Ctl POAF POAF Ctl Ctl Ctl POAF Ctl Ctl POAF POAF Ctl

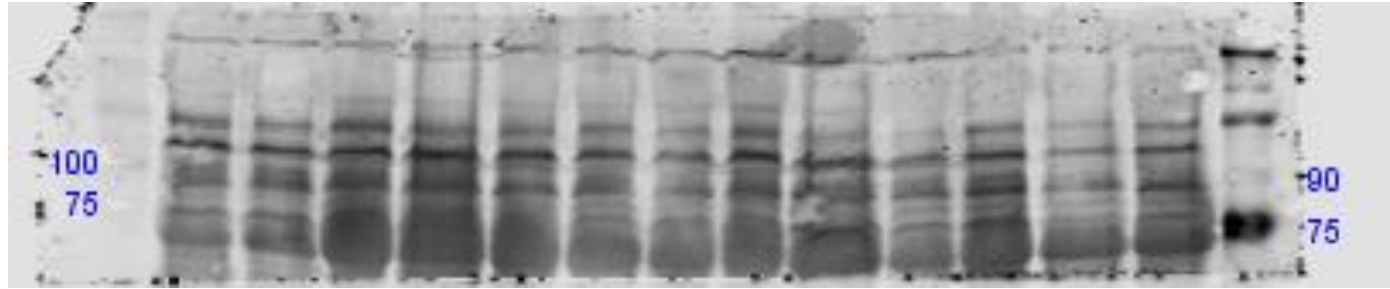

### GAPDH

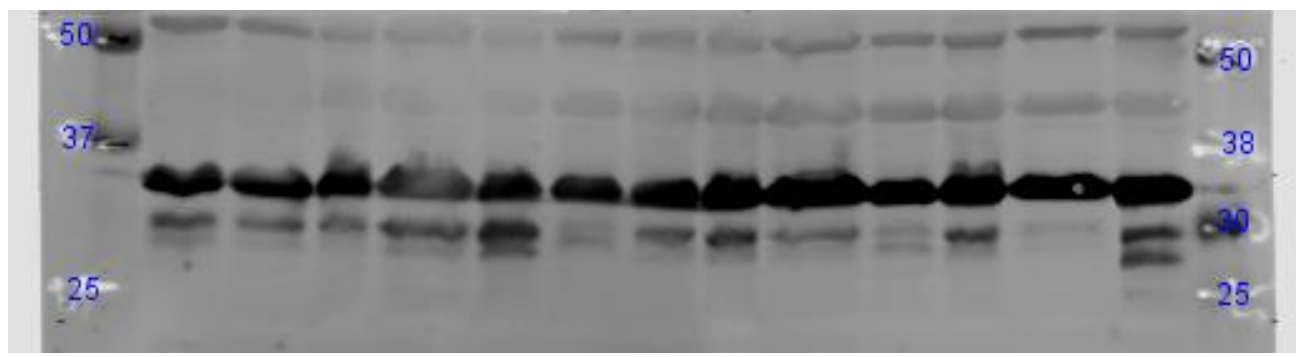

**Figure 5B – Human atrial whole-tissue lysates**

Gel 1 / 4

Ctl Ctl POAF POAF Ctl Ctl POAF POAF

P2X7R

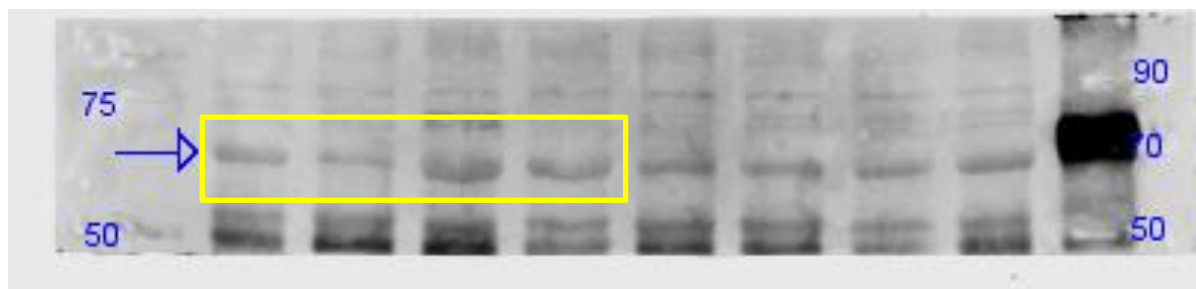

GAPDH

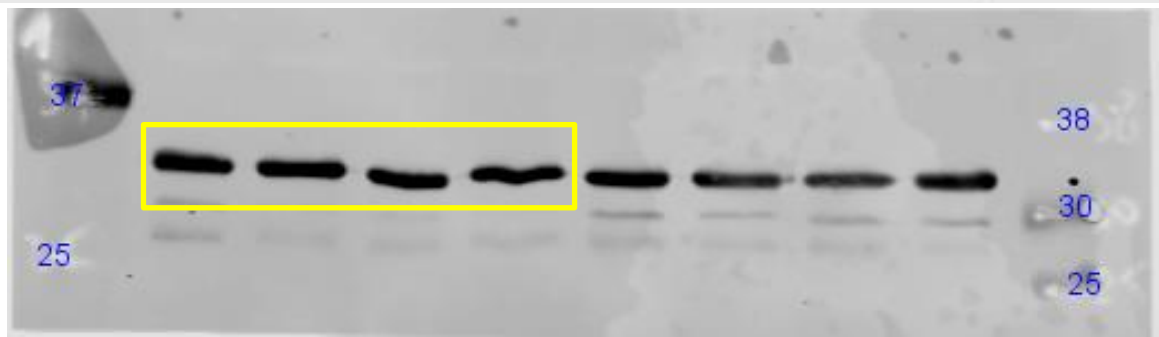

Gel 2 / 4

Ctl Ctl POAF POAF Ctl Ctl POAF POAF Ctl

P2X7R

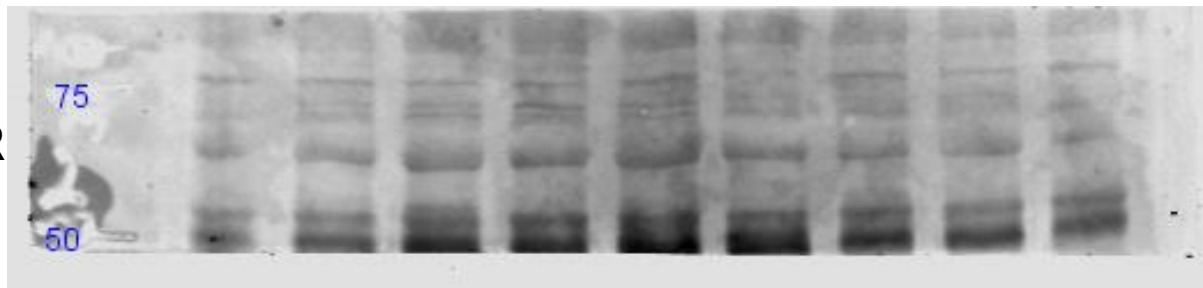

GAPDH

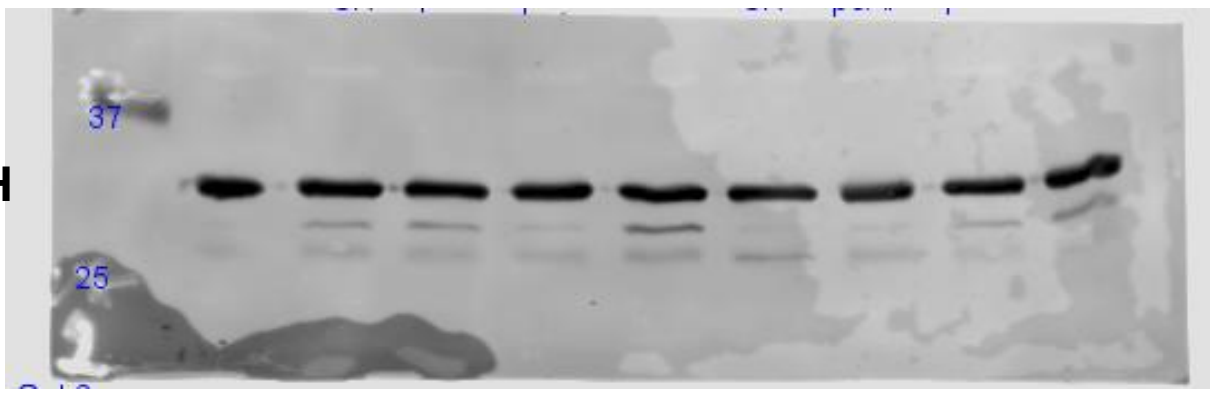

Figure 5B – Human atrial whole-tissue lysates

Gel 3 / 4

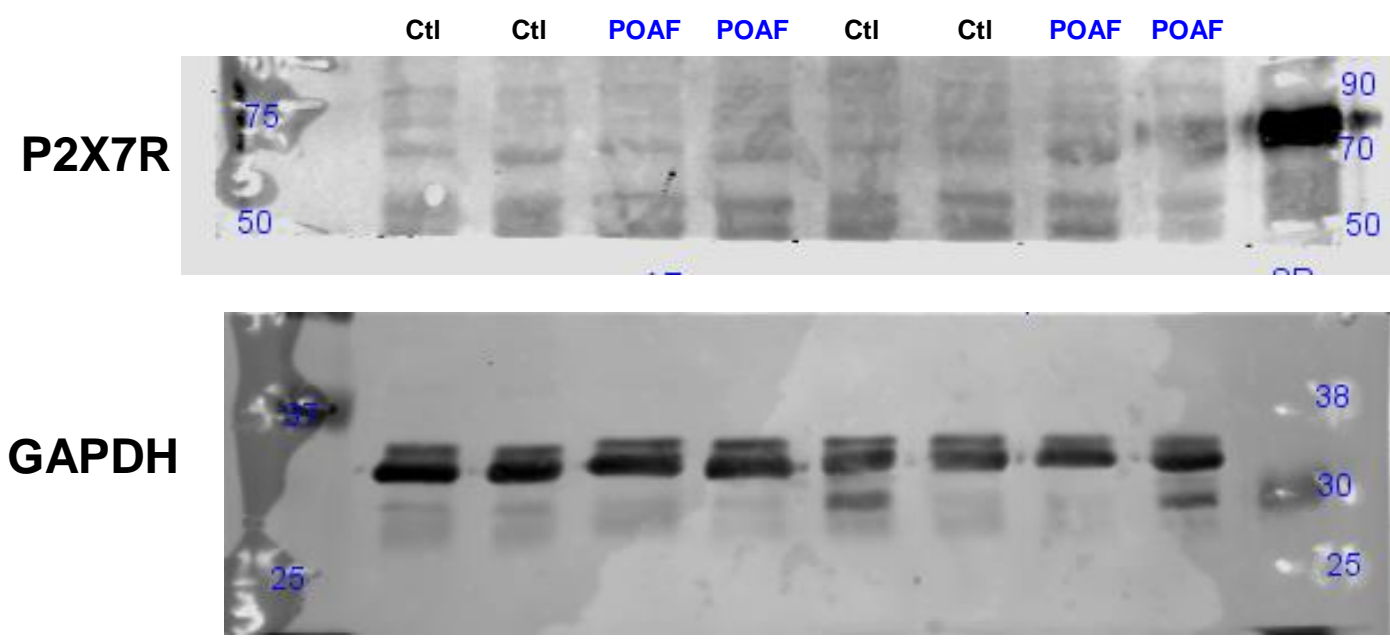

Gel 4 / 4

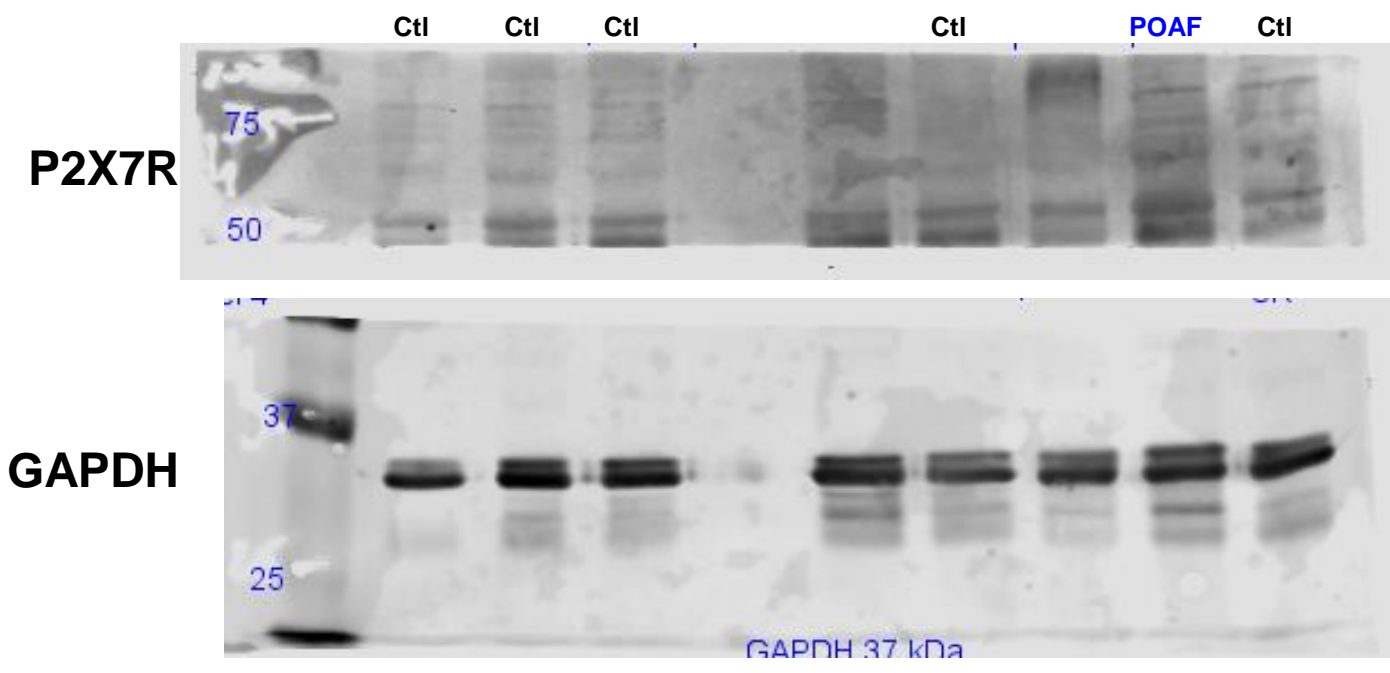

**Figure 5B – Human atrial whole-tissue lysates**

Gel 1 / 2

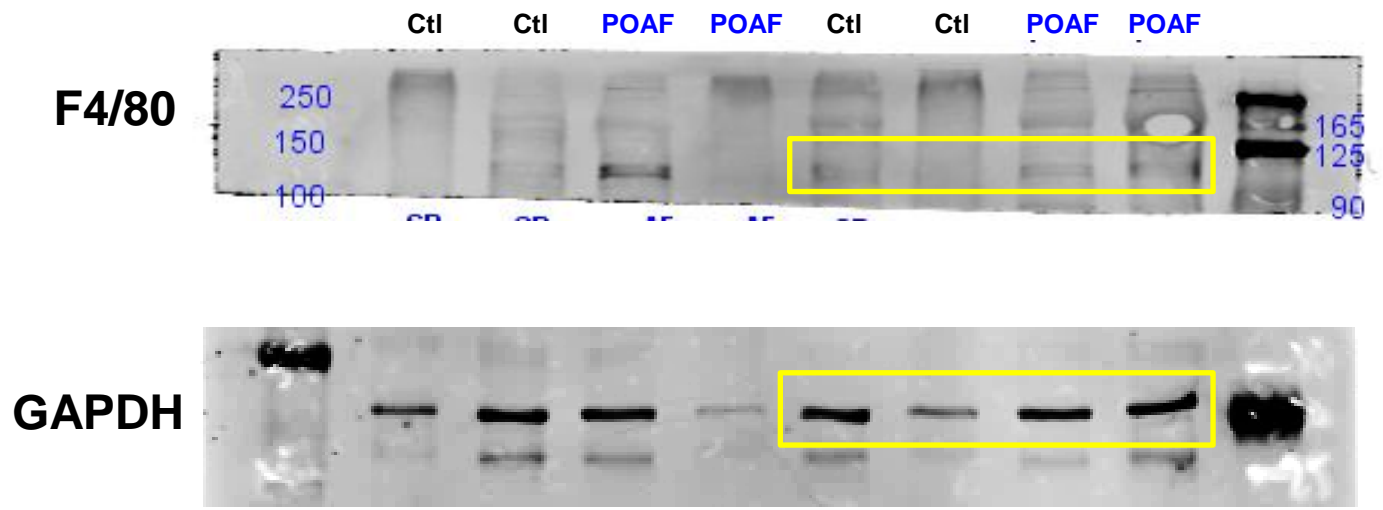

Gel 2 / 2

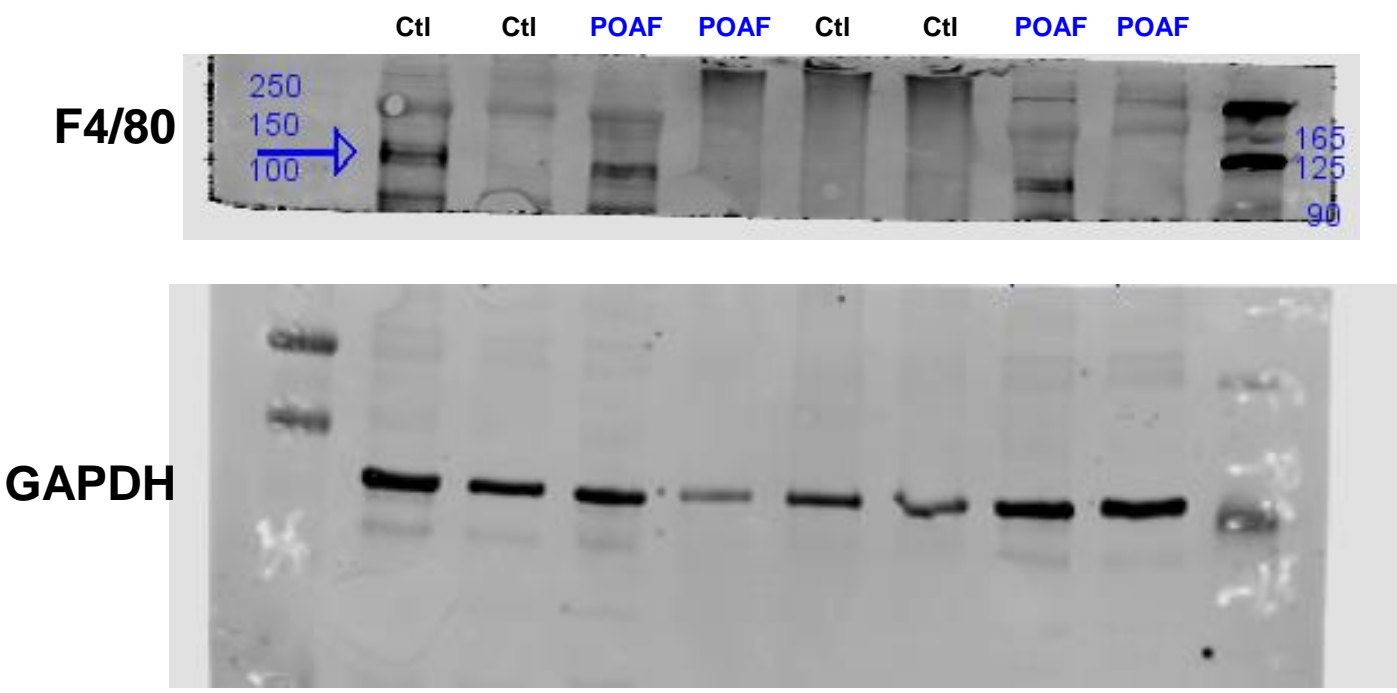

**Figure 5C – Human atrial whole-tissue lysates**

Gel 1 / 4

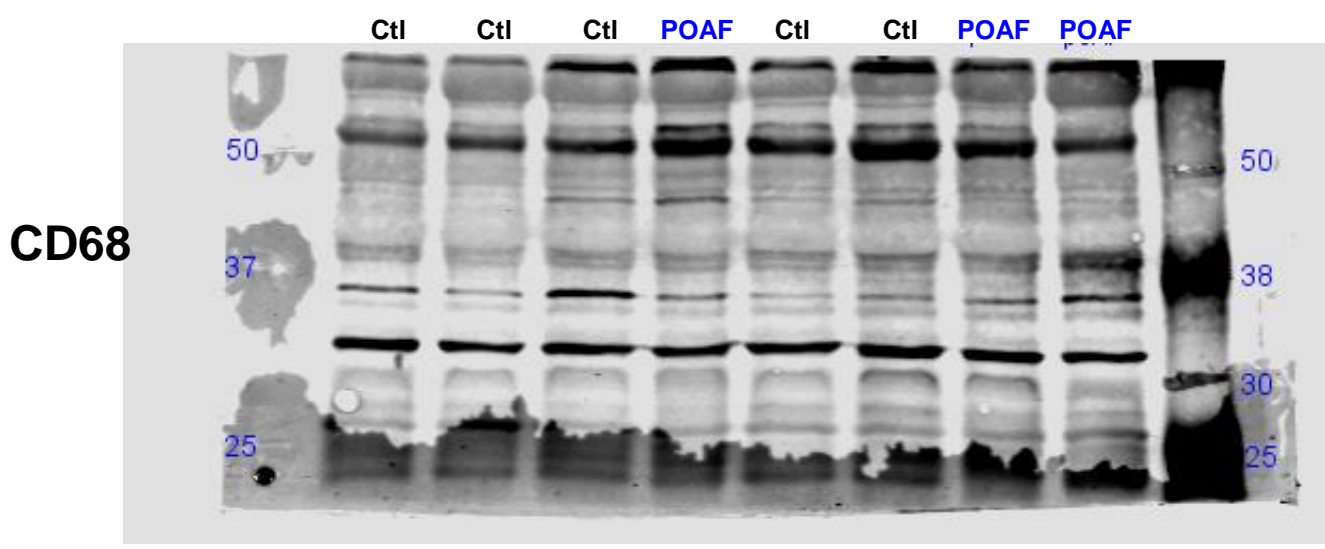

GAPDH

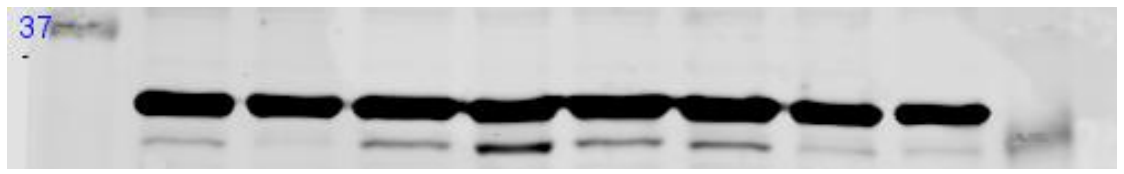

Gel 2 / 4

CD68

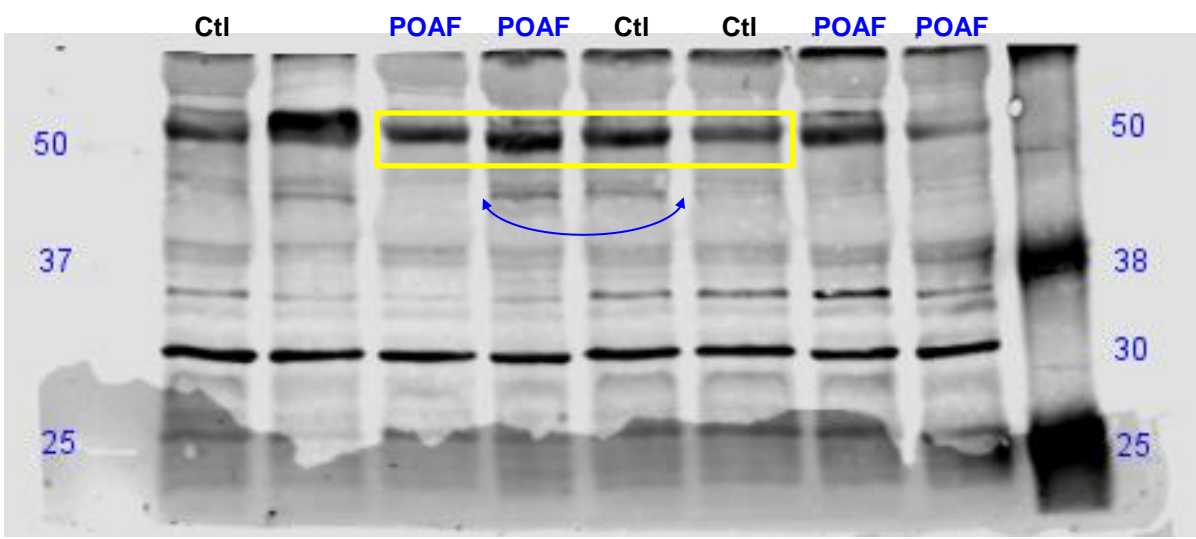

GAPDH

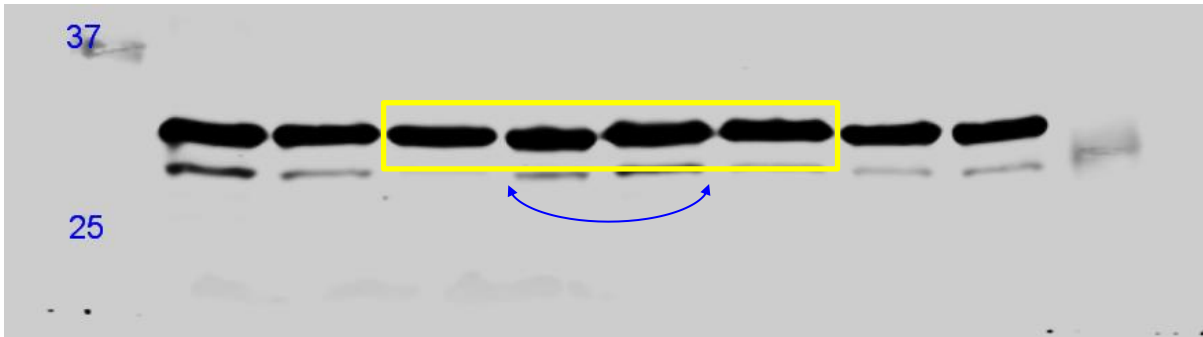

**Figure 5C – Human atrial whole-tissue lysates**

Gel 3 / 4

Ctl Ctl POAF POAF Ctl Ctl POAF POAF

CD68

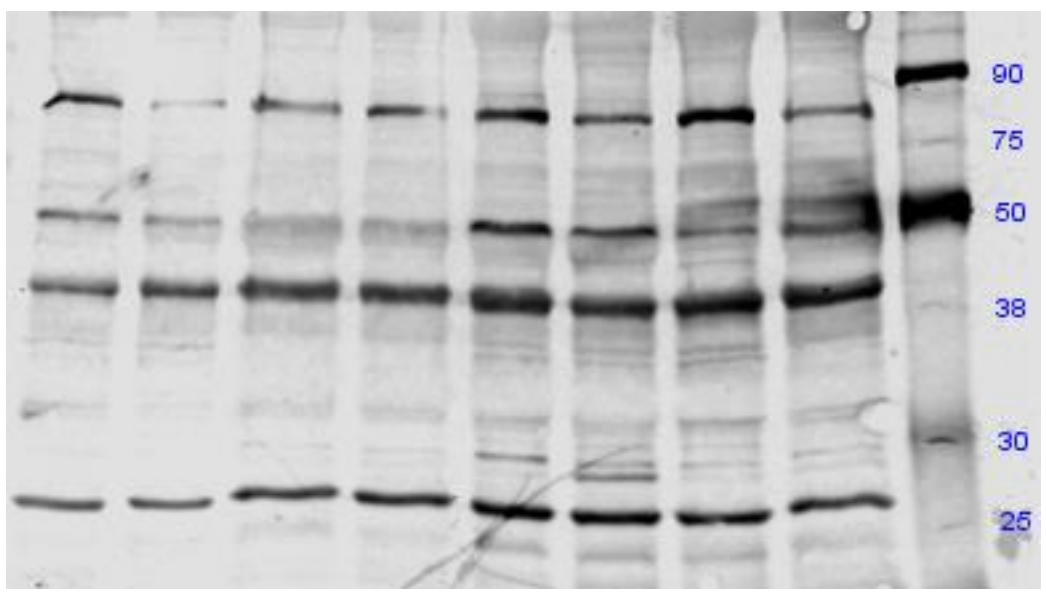

GAPDH

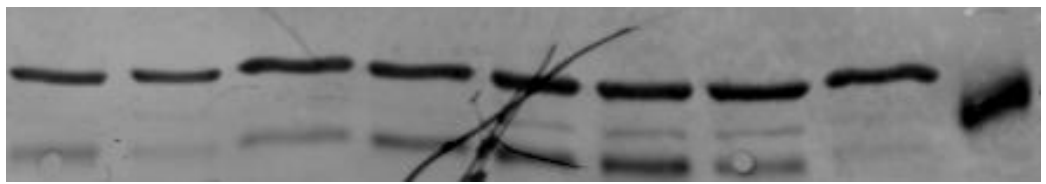

Gel 4 / 4

Ctl Ctl POAF Ctl Ctl POAF POAF

CD68

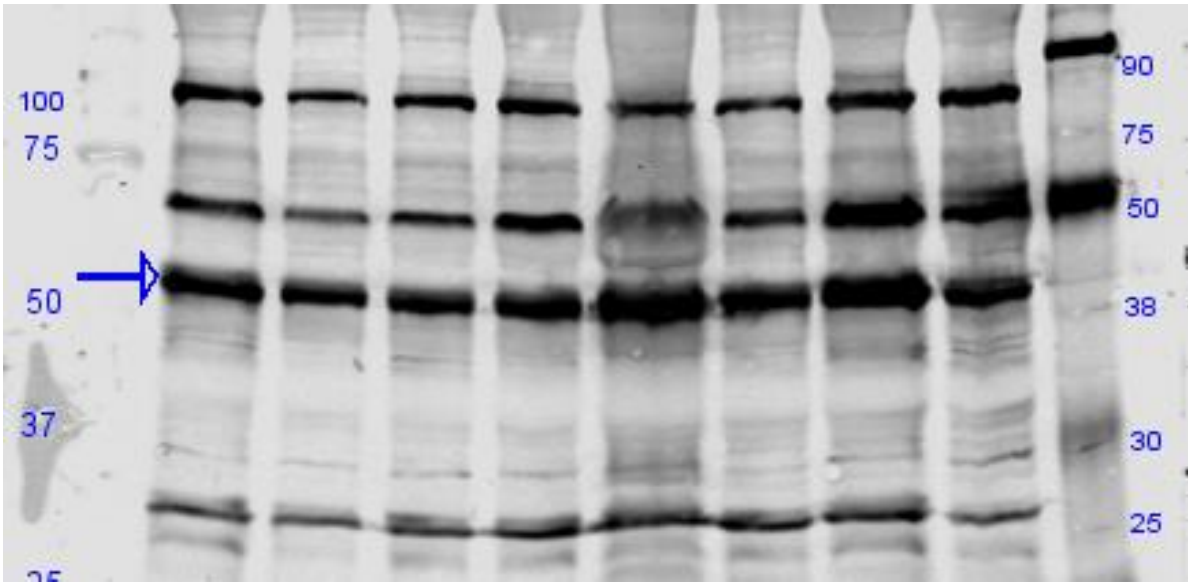

GAPDH

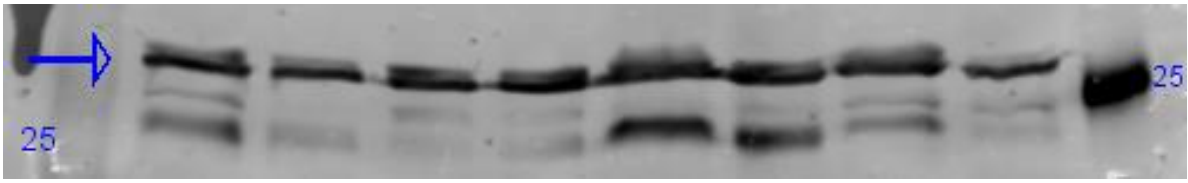

Figure 5C – Human atrial whole-tissue lysates

Gel 1 / 3

Ctl POAF POAF Ctl Ctl POAF POAF Ctl Ctl POAF POAF Ctl

CD206

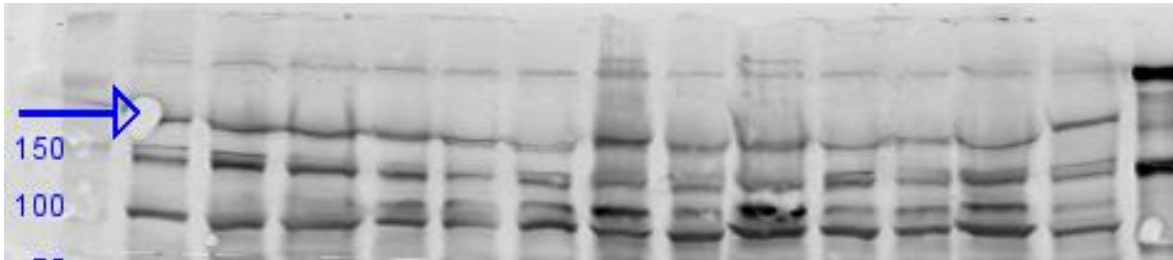

GAPDH

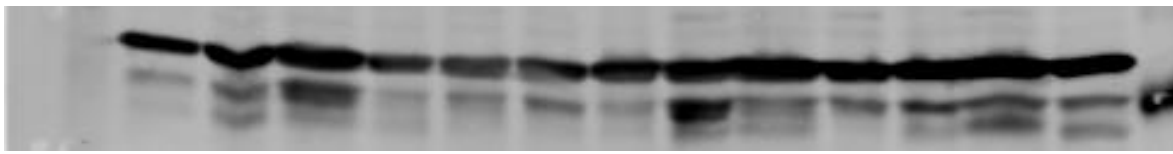

Gel 2 / 3

Ctl POAF POAF Ctl Ctl POAF POAF Ctl Ctl POAF POAF Ctl

CD206

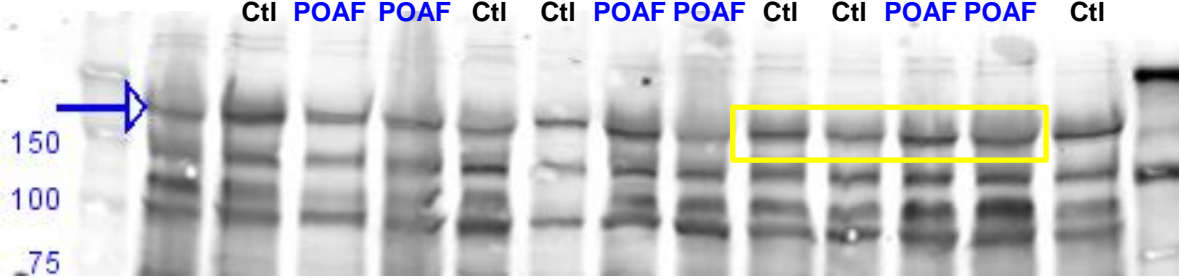

GAPDH

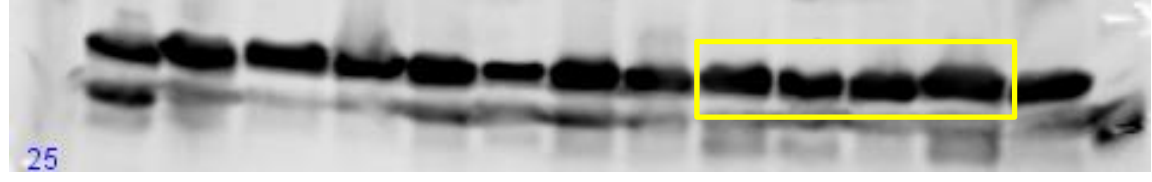

Gel 3 / 3

Ctl Ctl POAF POAF Ctl Ctl POAF Ctl POAF Ctl POAF

CD206

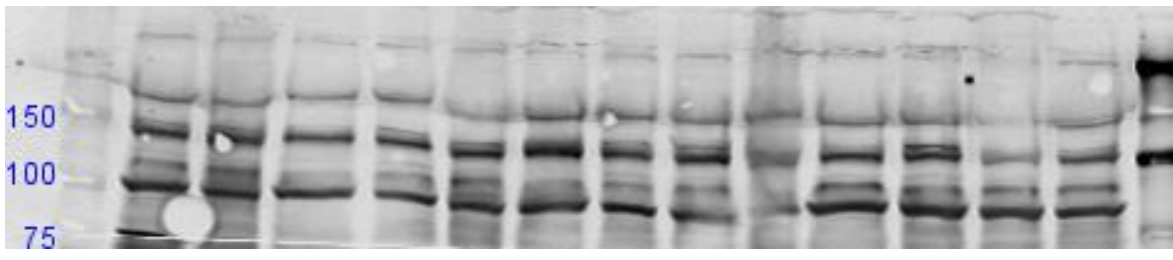

GAPDH

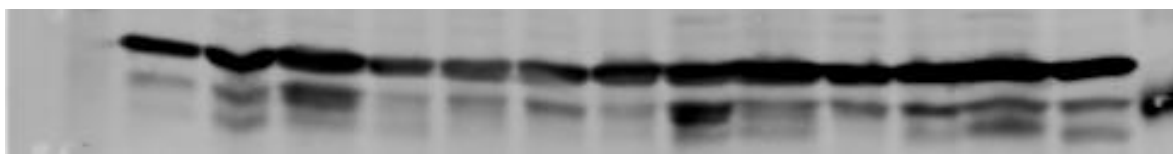

Figure 5C – Human atrial whole-tissue lysates



# NLRP3

Ctl Ctl POAF POAF Ctl Ctl POAF POAF

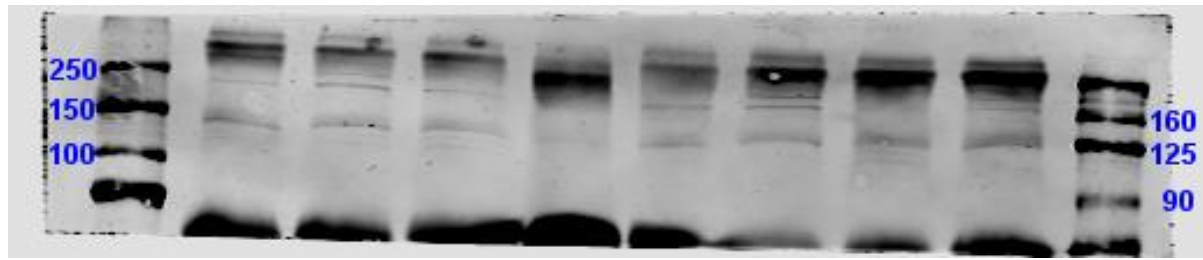

# Ponceau

Ctl Ctl POAF POAF Ctl Ctl POAF POAF

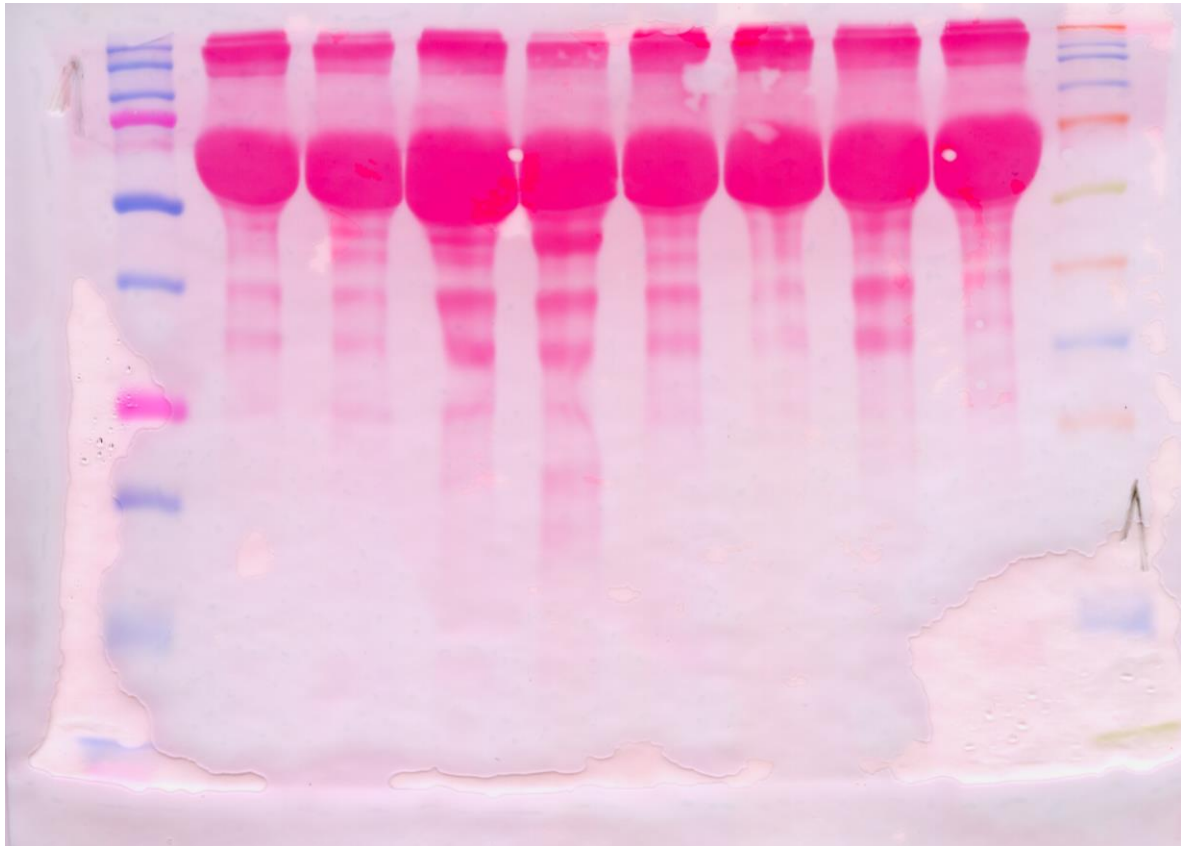

**Figure 6A – Human atrial cardiomyocytes**

# NLRP3

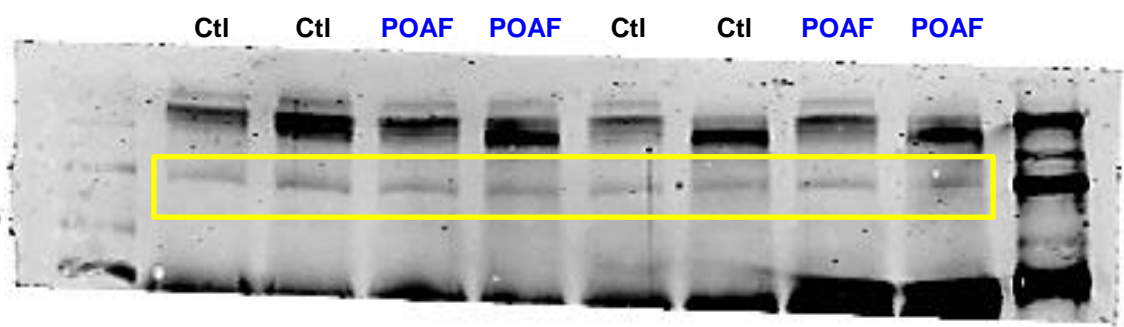

# Ponceau

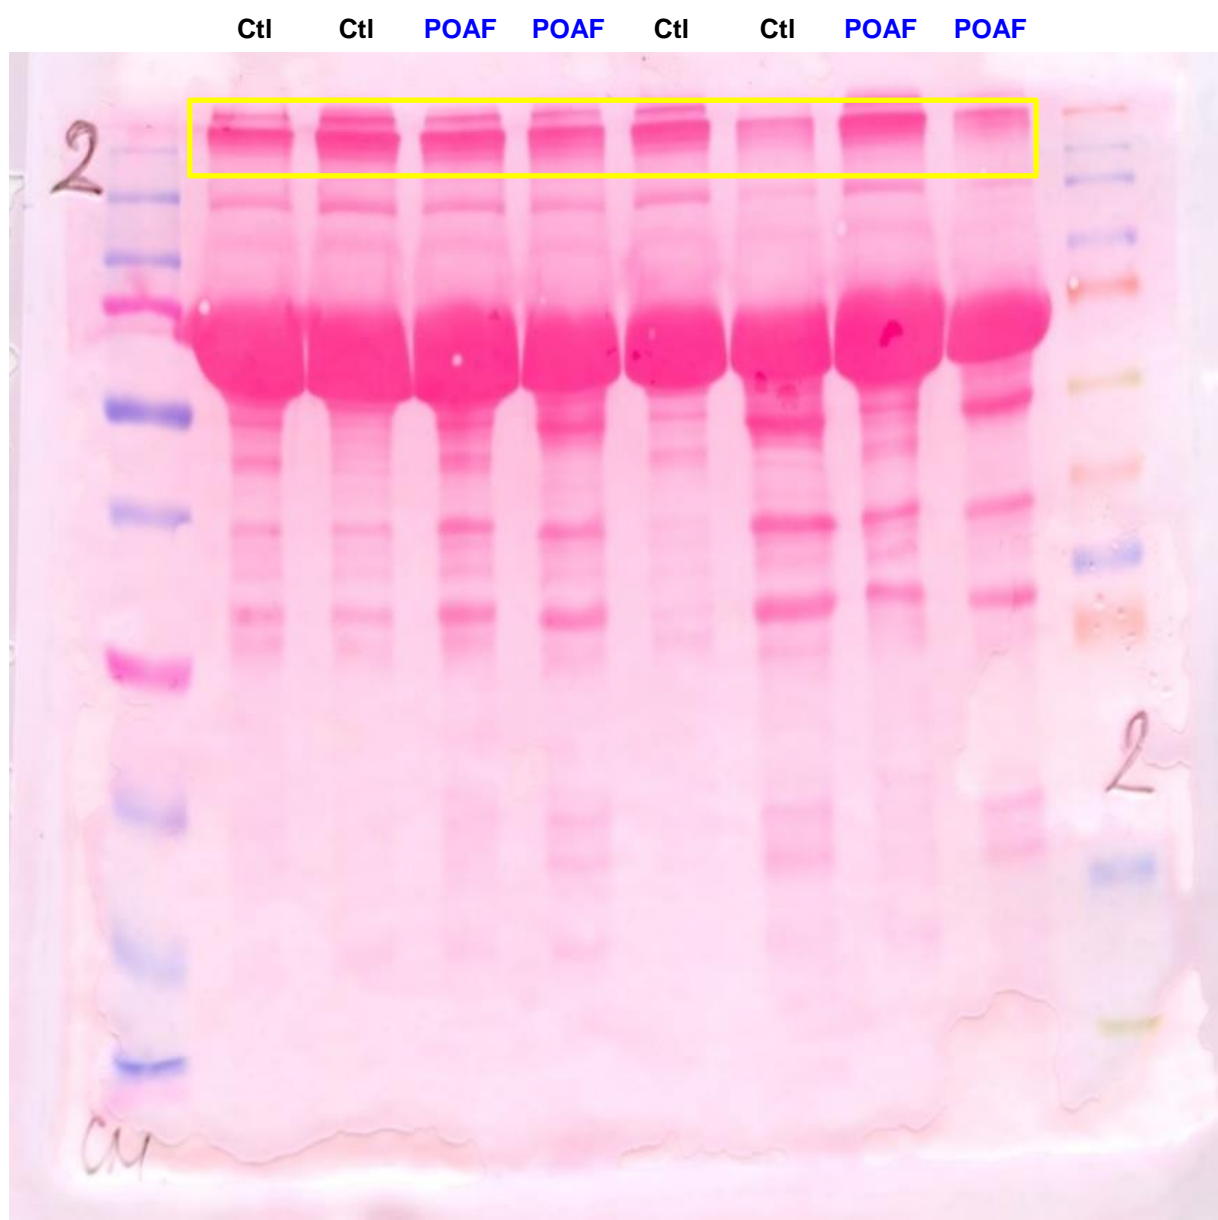

**Figure 6A – Human atrial cardiomyocytes**

# NLRP3

Ctl Ctl POAF POAF Ctl Ctl POAF POAF

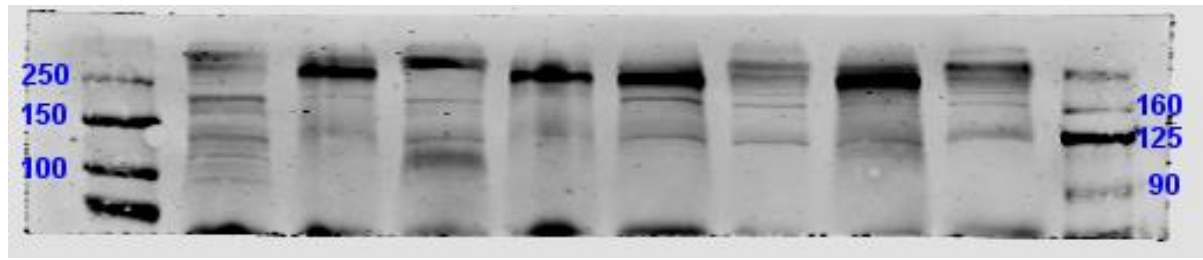

# Ponceau

Ctl Ctl POAF POAF Ctl Ctl POAF POAF

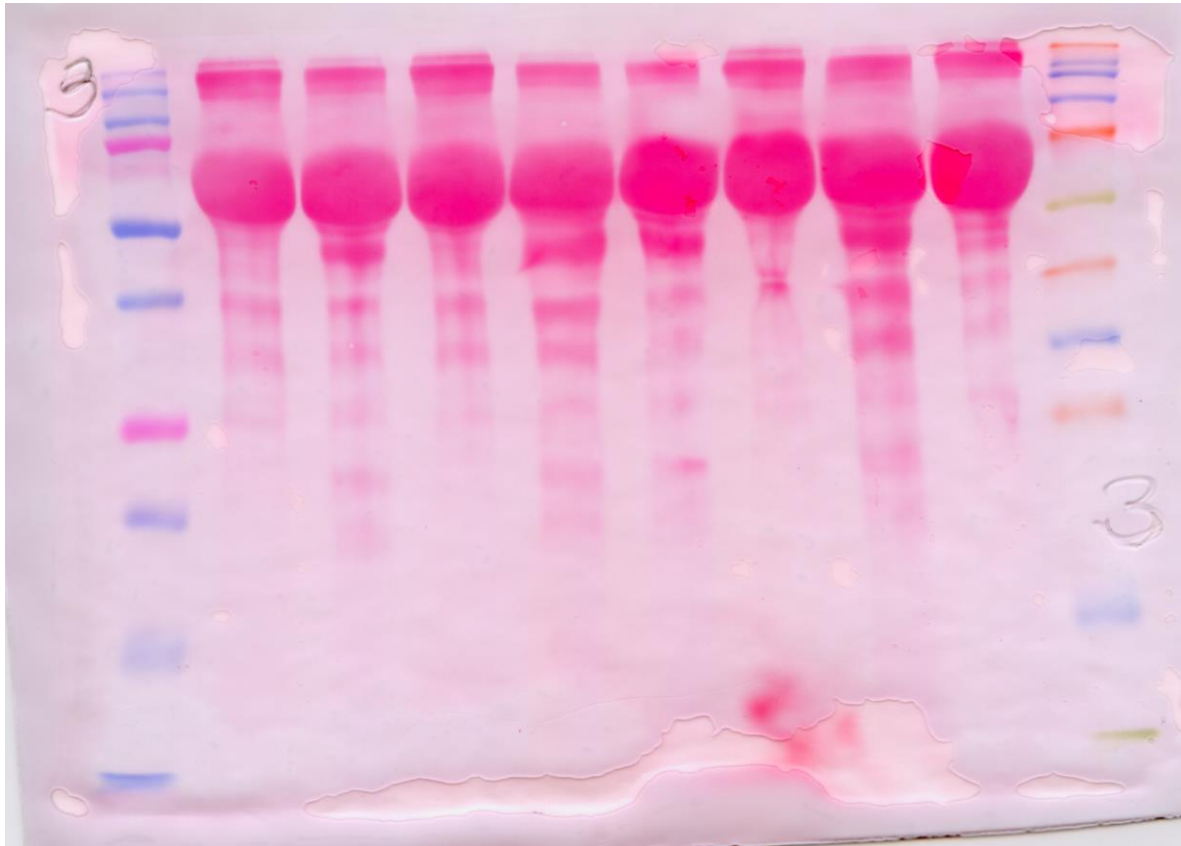

**Figure 6A – Human atrial cardiomyocytes**

# NLRP3

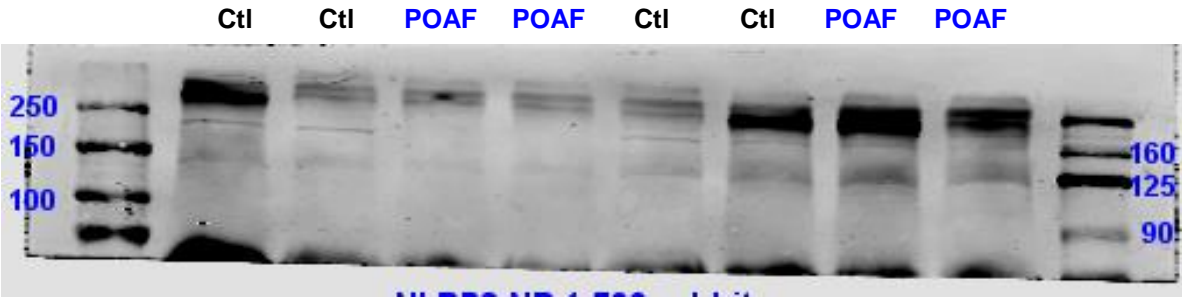

# Ponceau

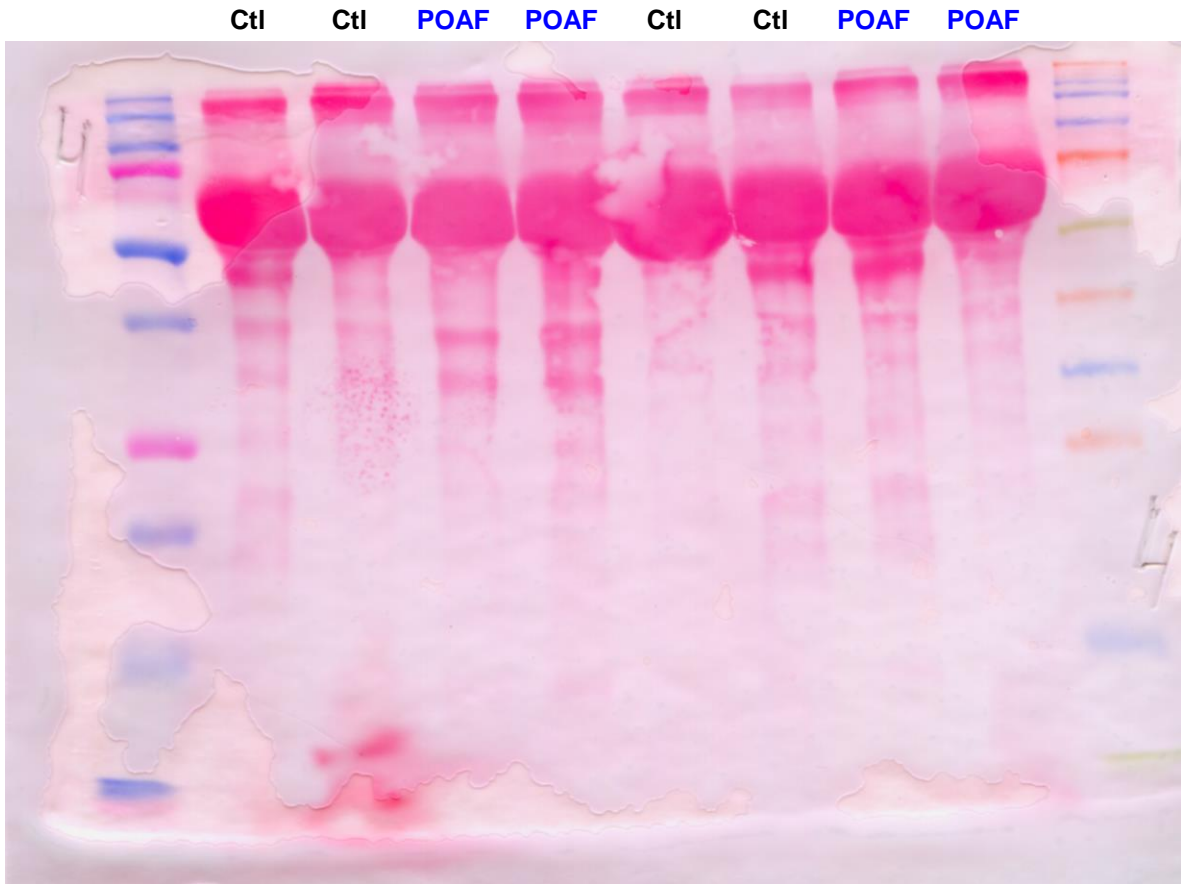

**Figure 6A – Human atrial cardiomyocytes**

# ASC

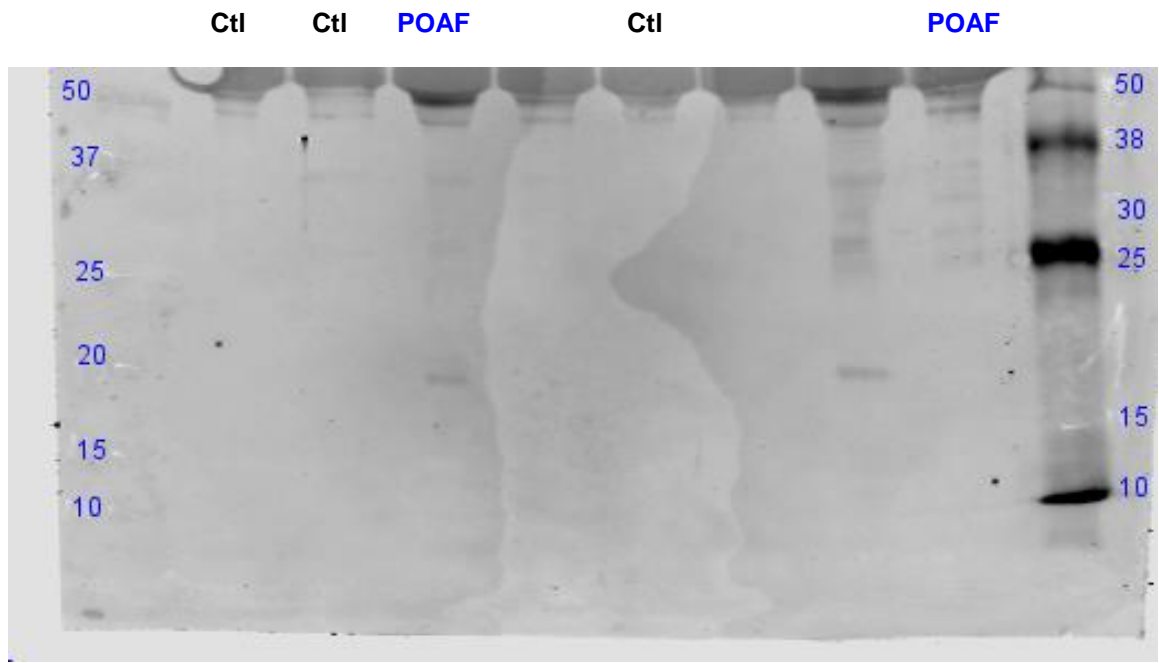

# Ponceau

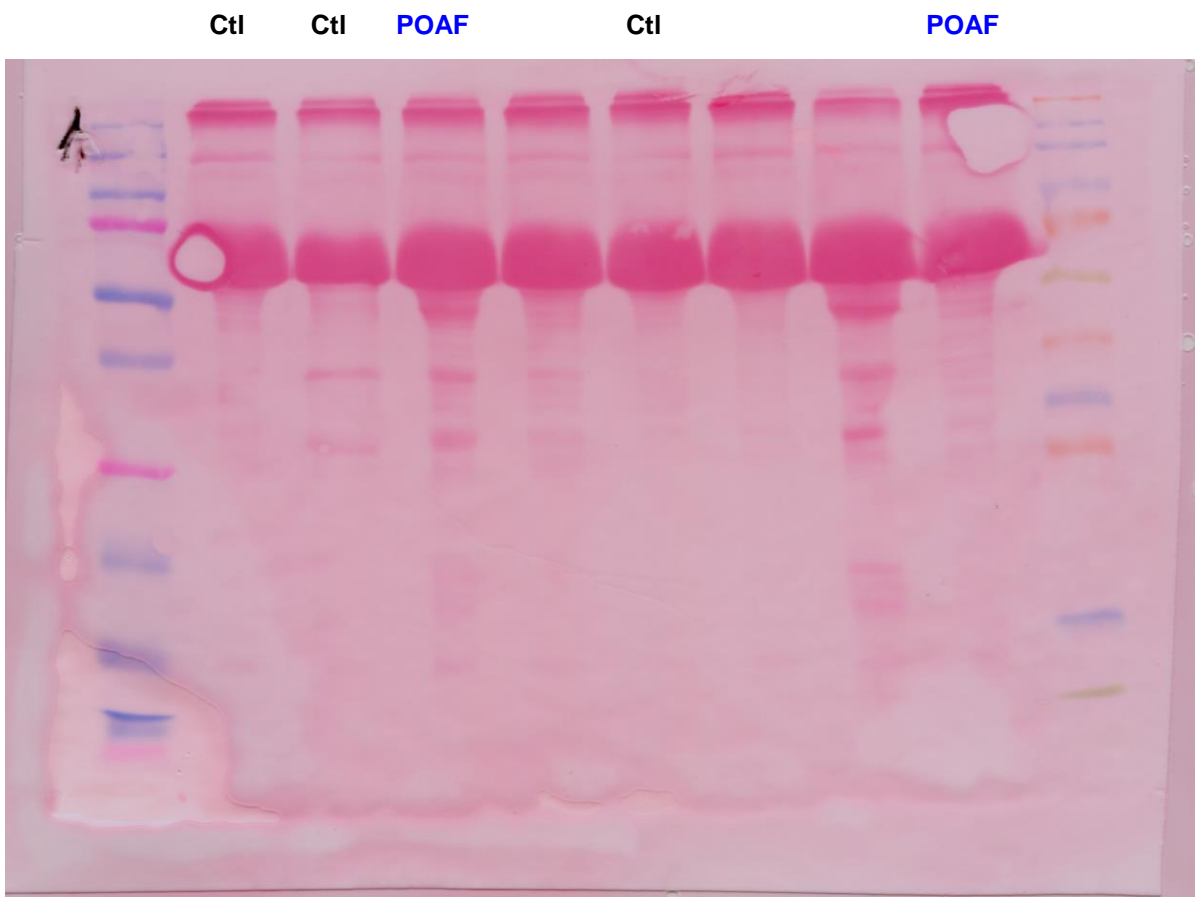

**Figure 6B – Human atrial cardiomyocytes**

# ASC

Ctl POAF Ctl Ctl POAF POAF

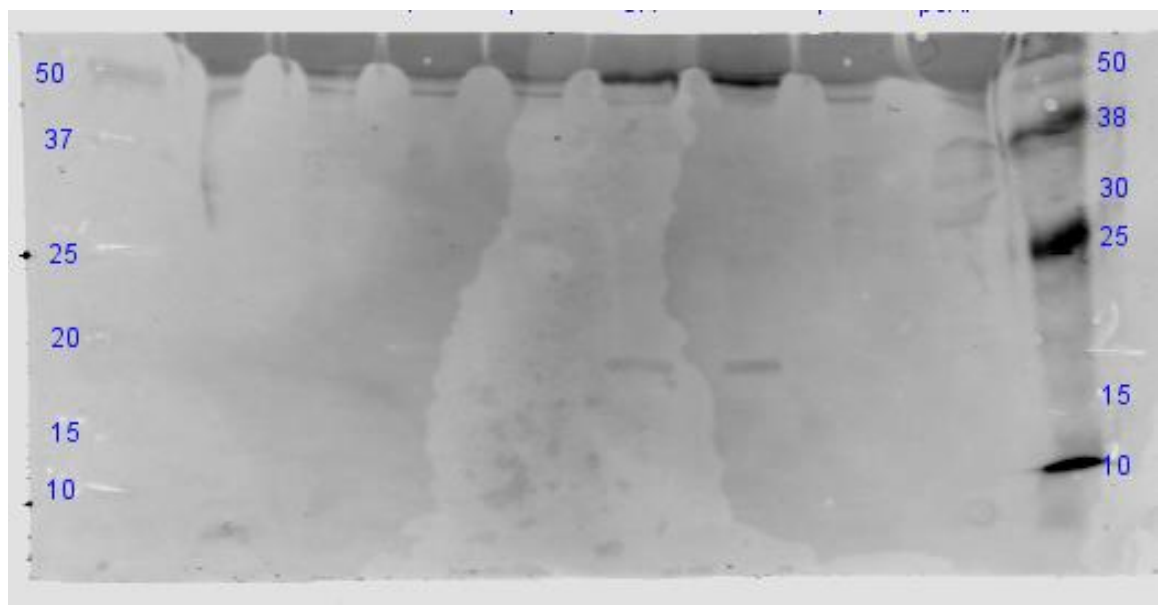

# Ponceau

Ctl POAF Ctl Ctl POAF POAF

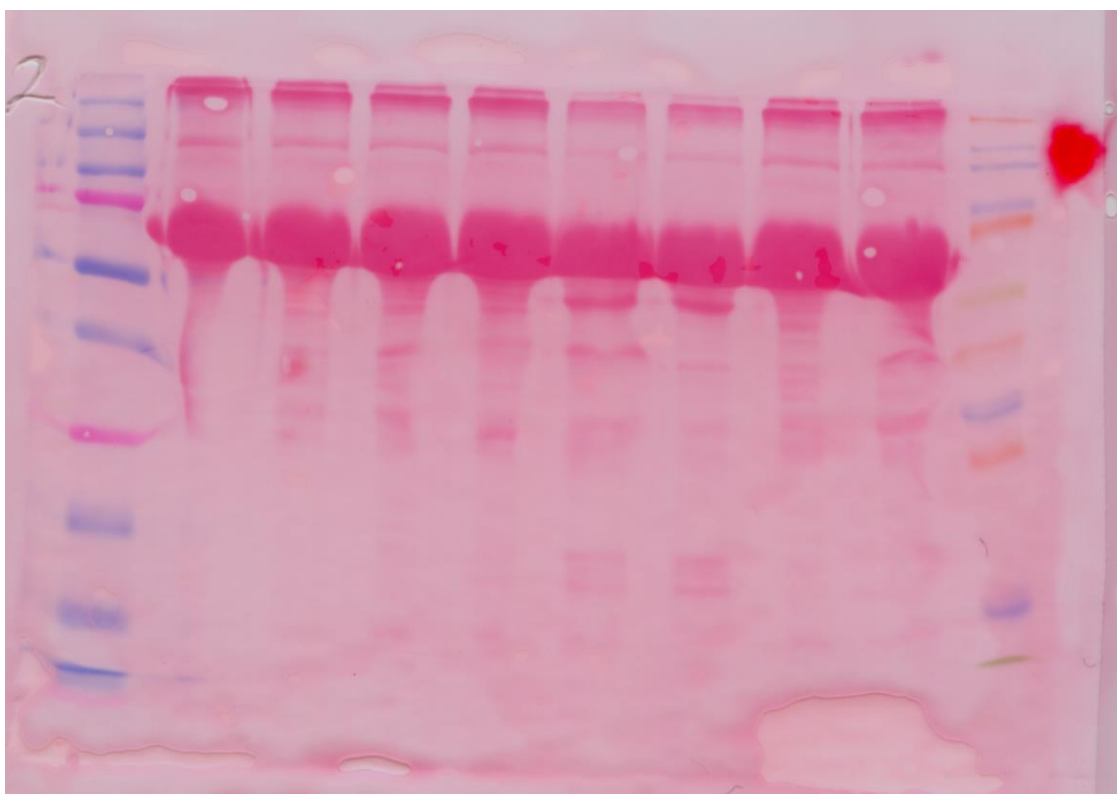

**Figure 6B – Human atrial cardiomyocytes**

# ASC

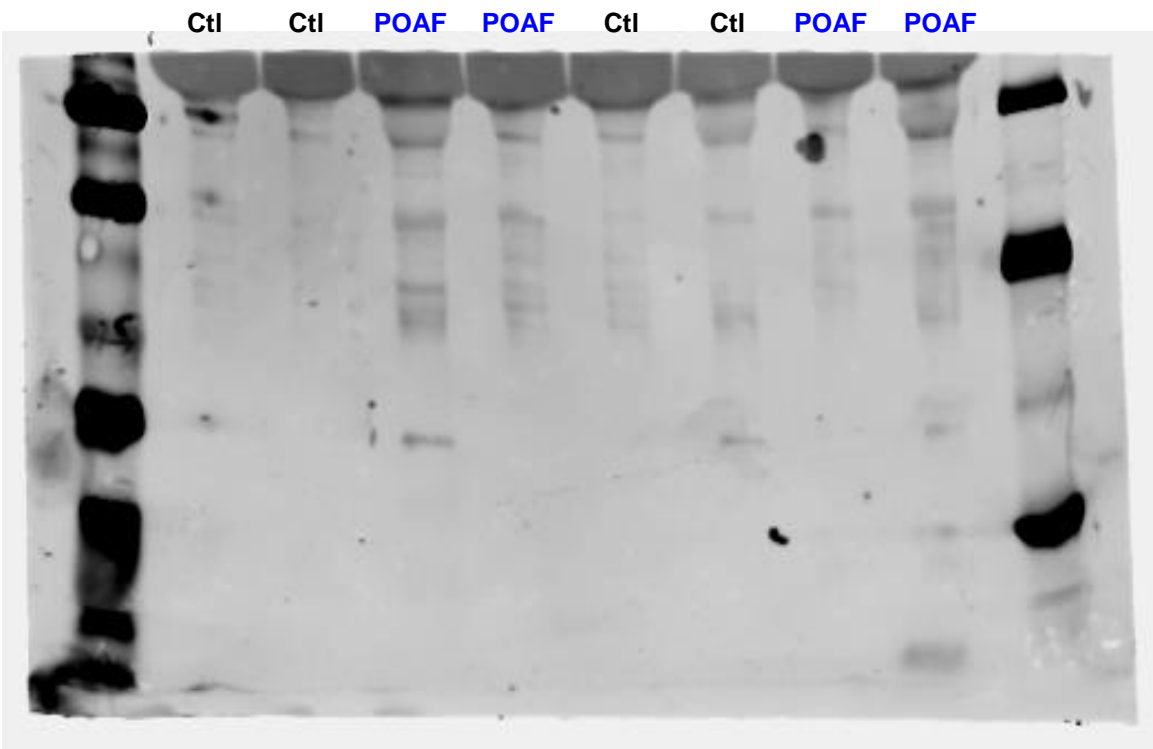

# Ponceau

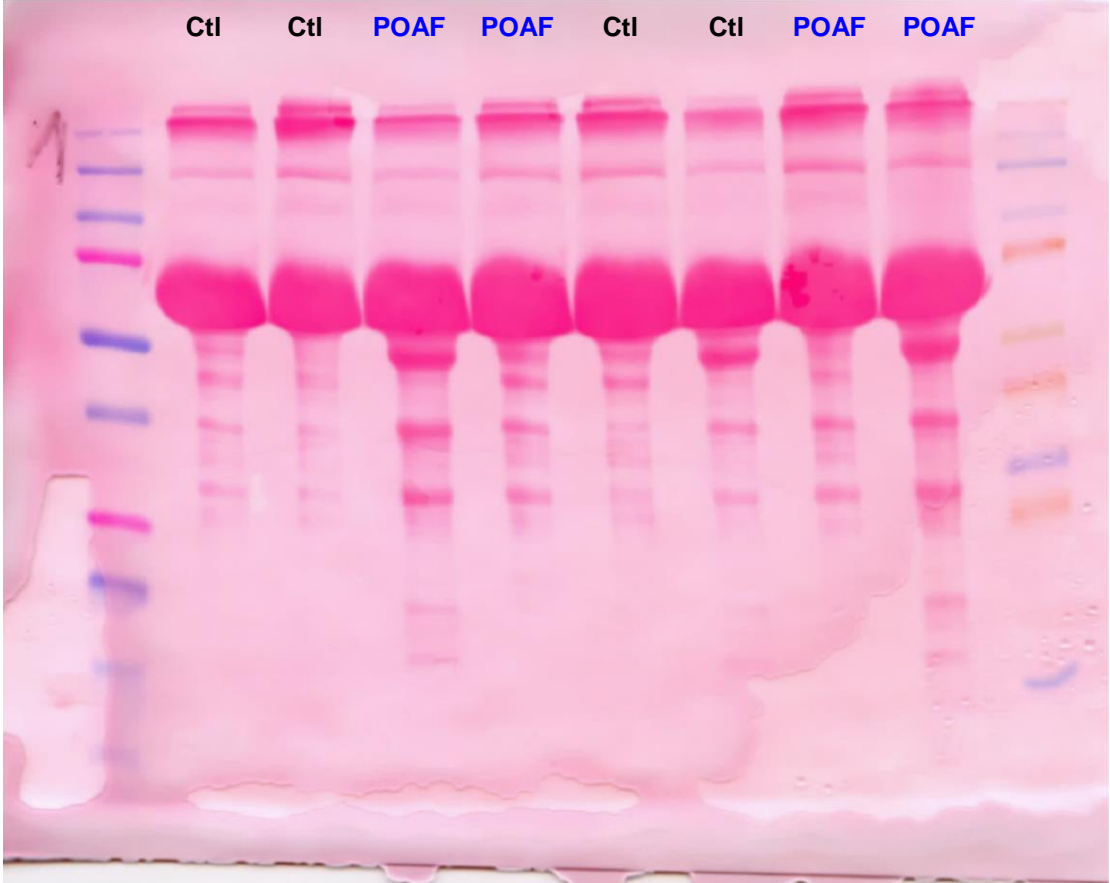

**Figure 6B – Human atrial cardiomyocytes**

# ASC

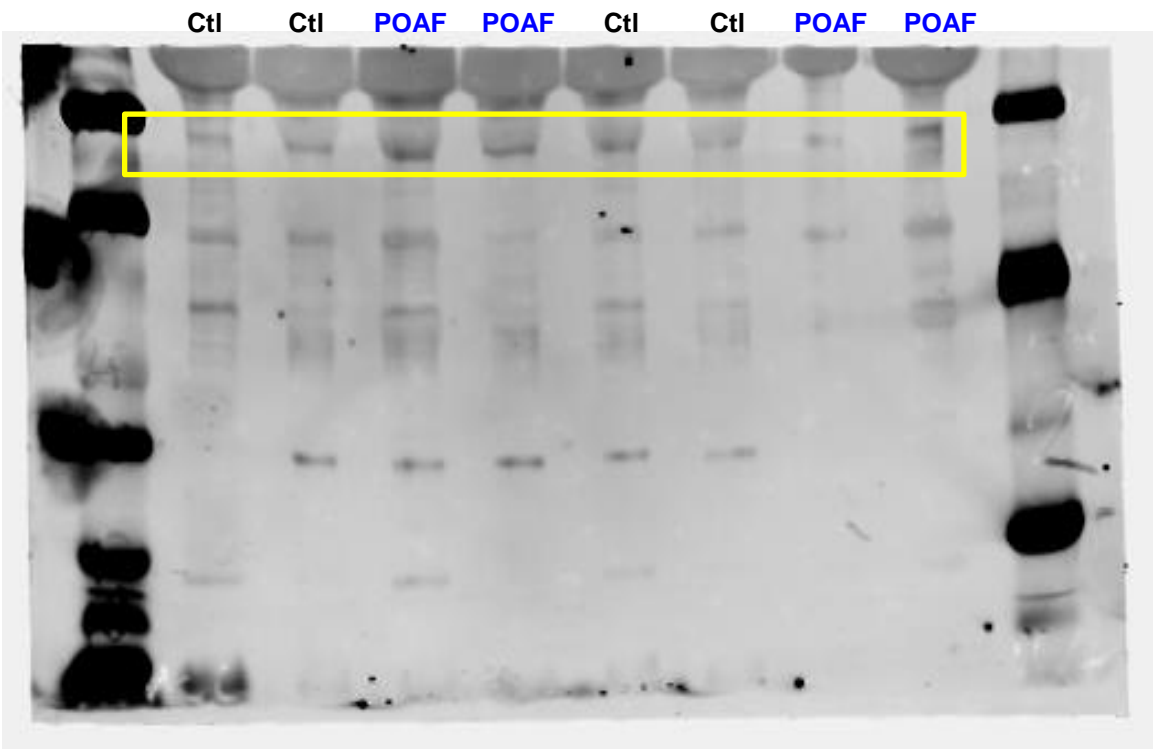

# Ponceau

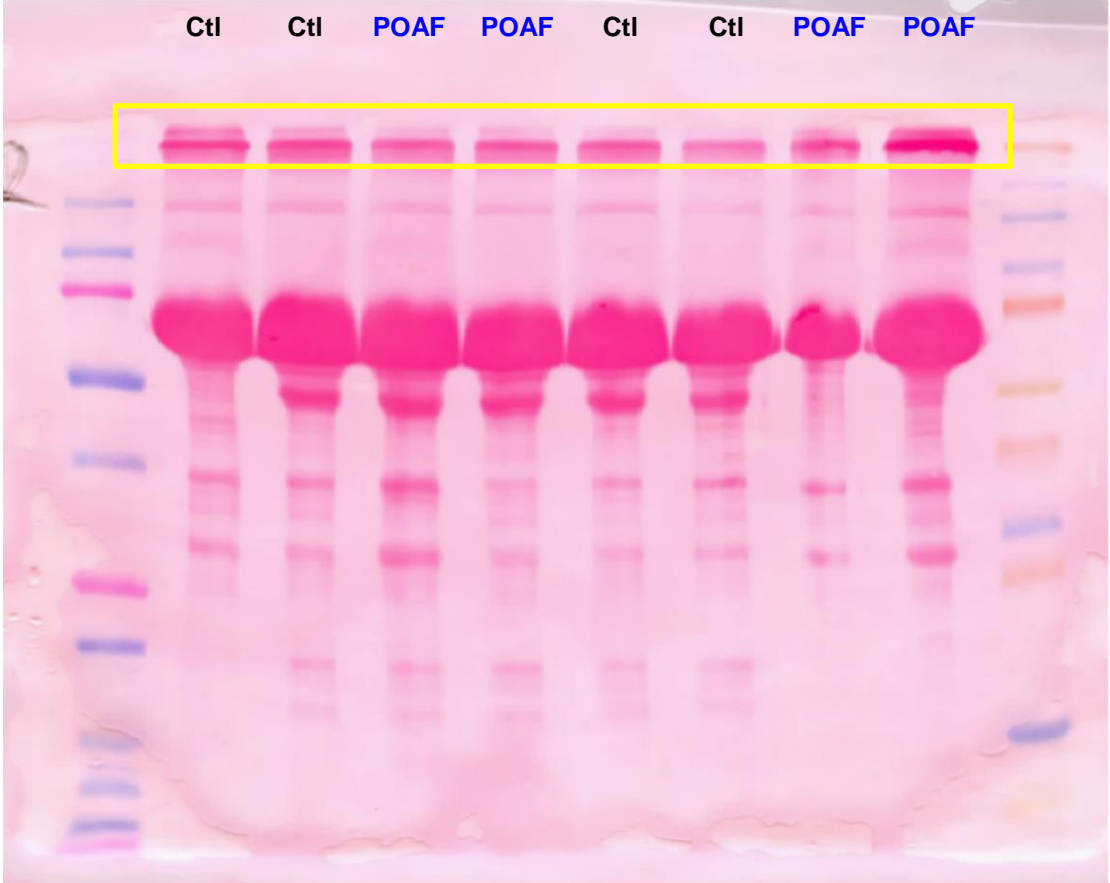

**Figure 6B – Human atrial cardiomyocytes**



# (Pro-)Caspase-1

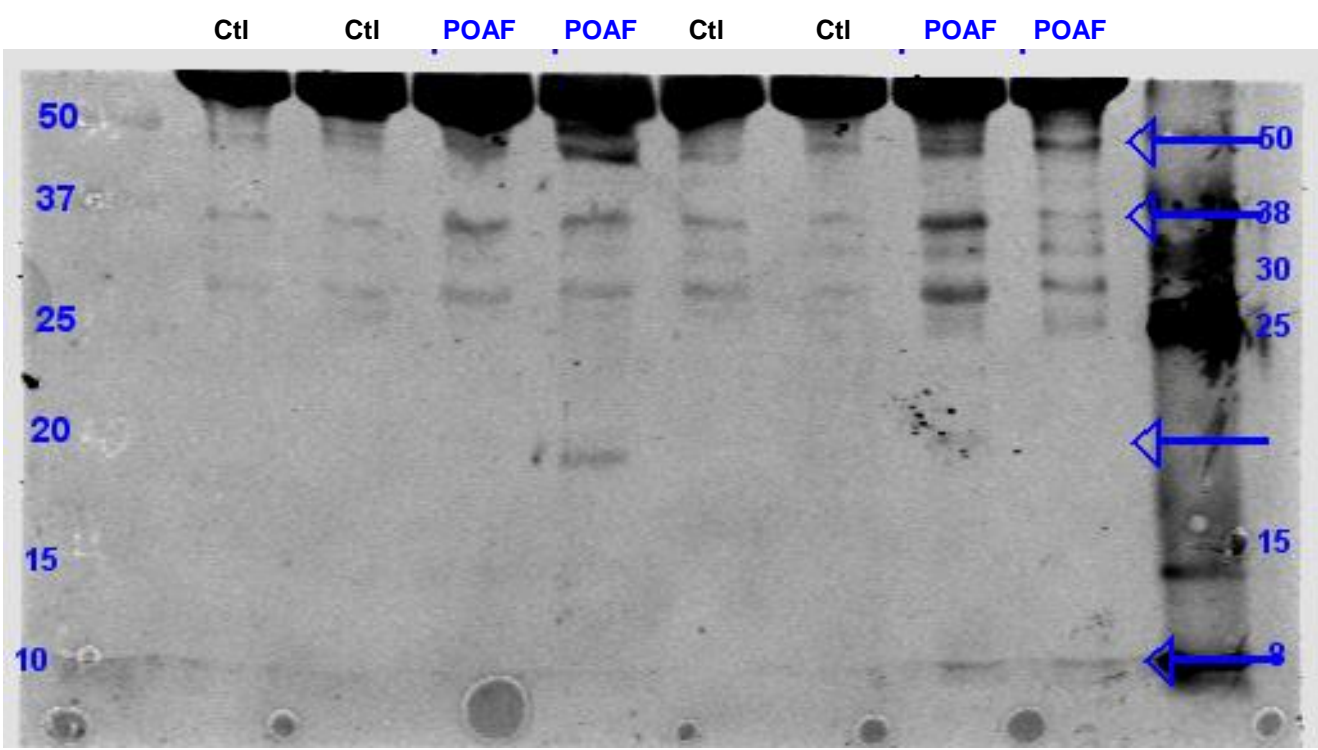

# Ponceau

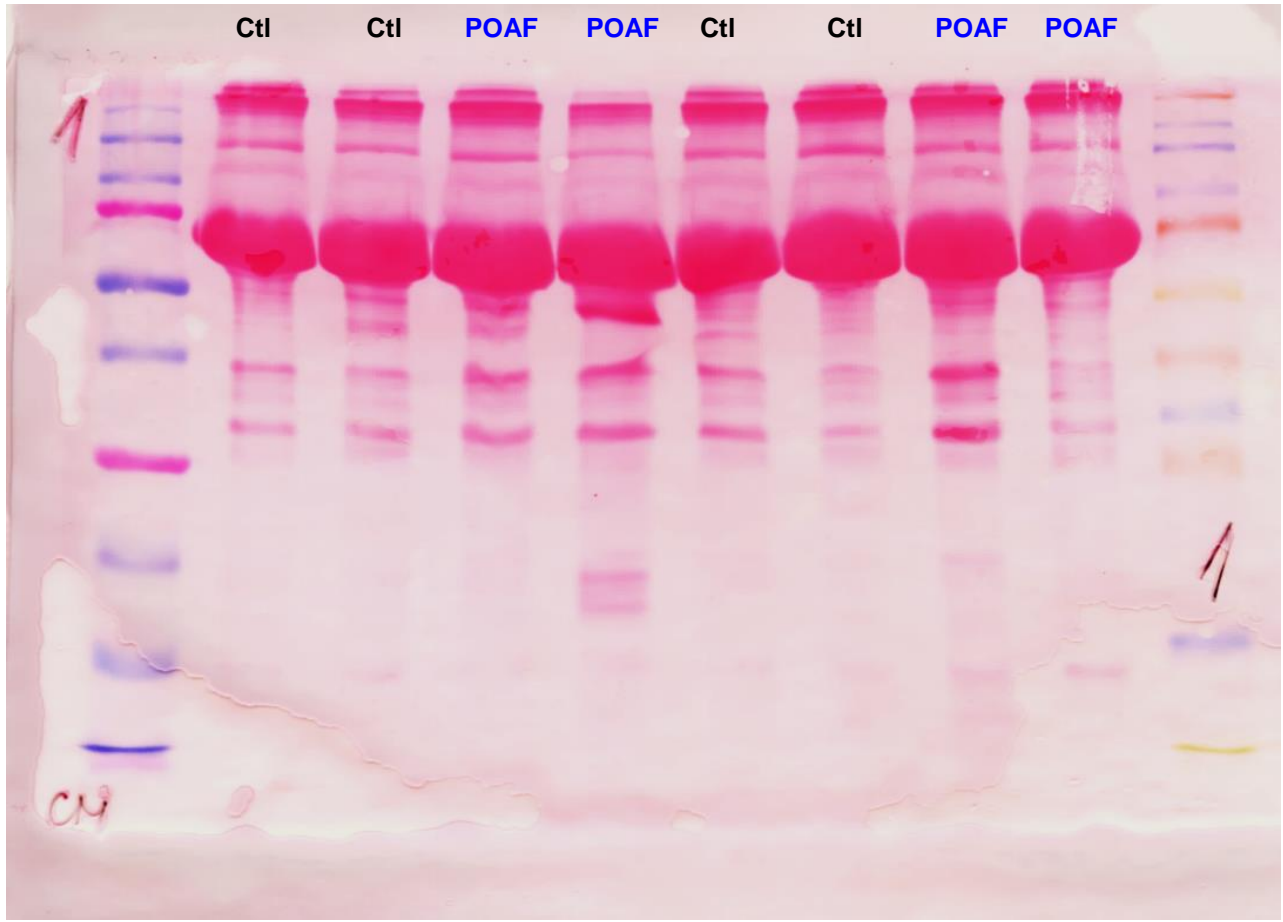

**Figure 6C – Human atrial cardiomyocytes**

# (Pro-)Caspase-1

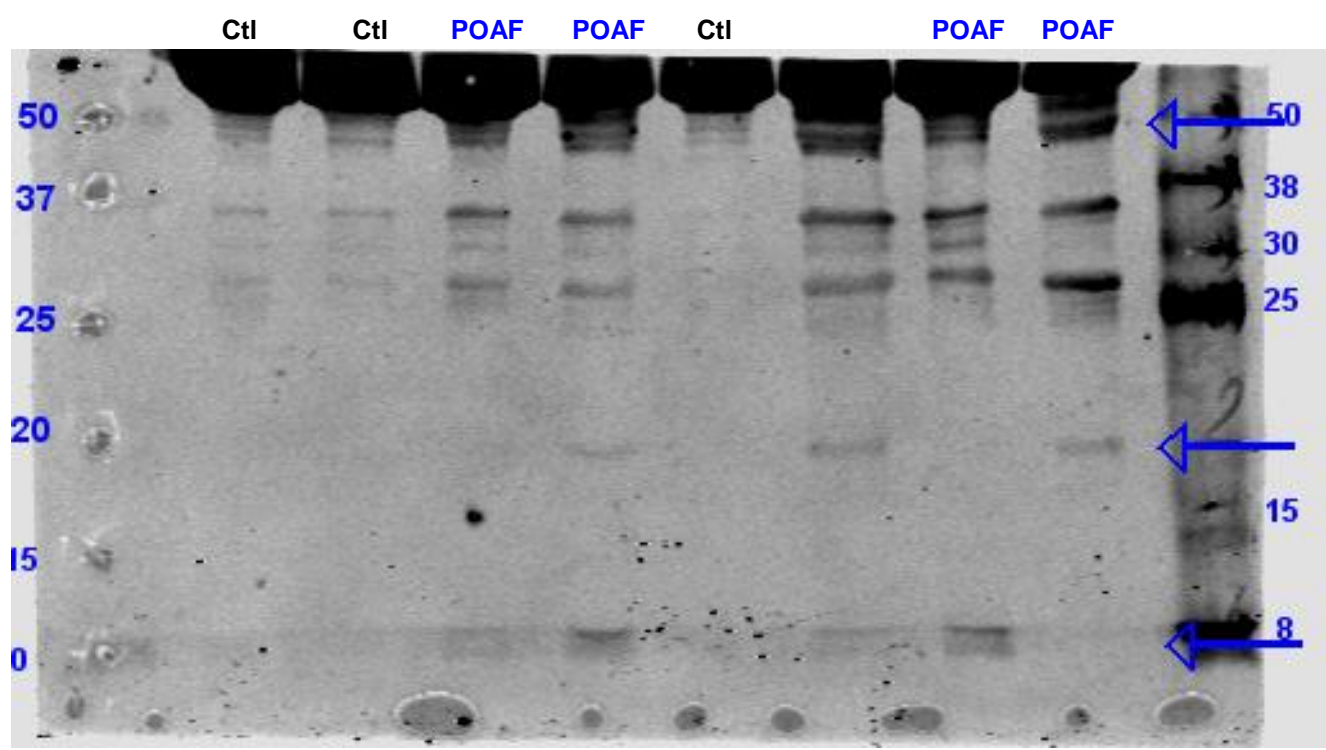

# Ponceau

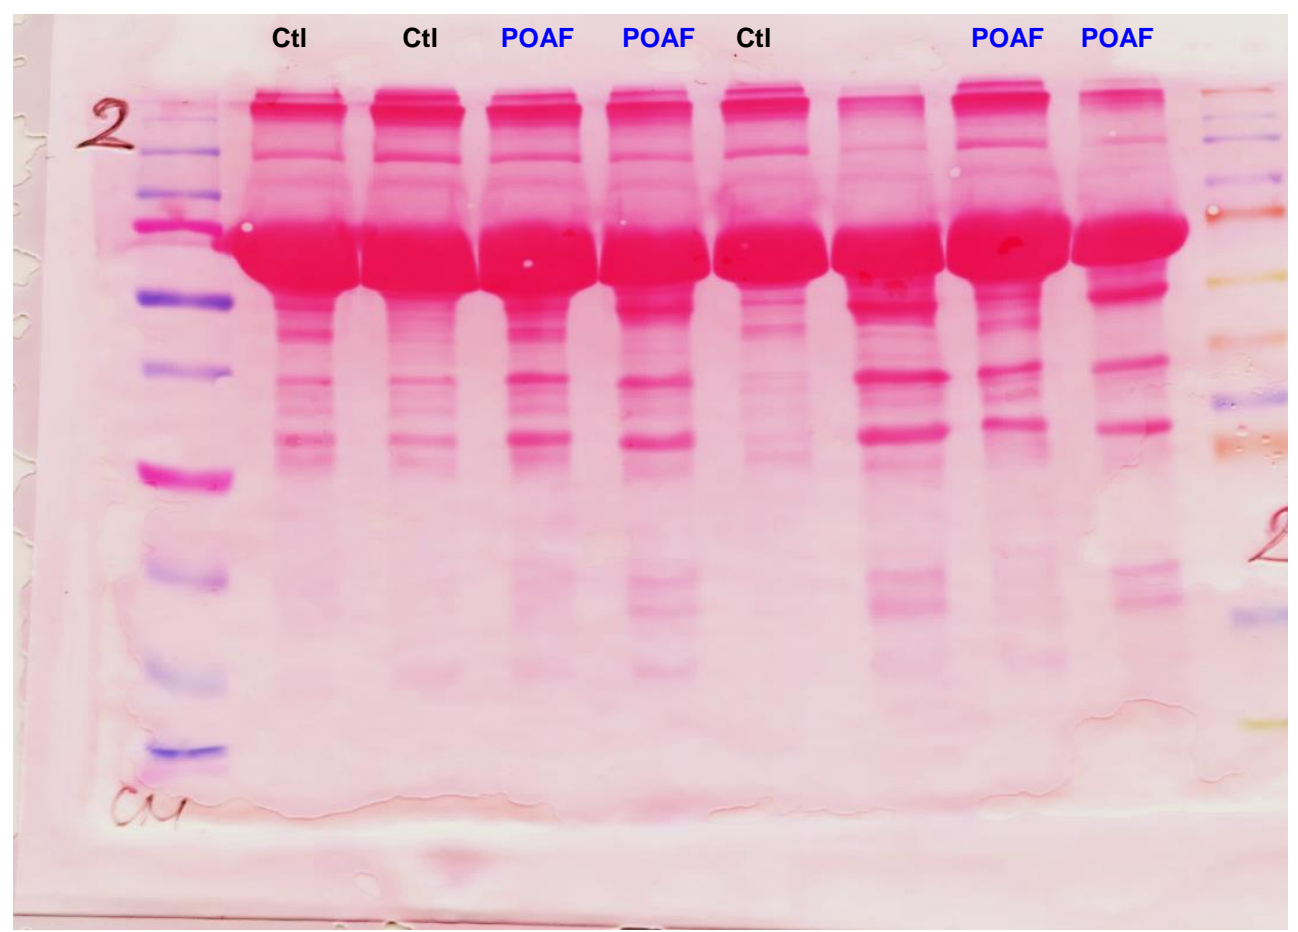

**Figure 6C – Human atrial cardiomyocytes**

# (Pro-)Caspase-1

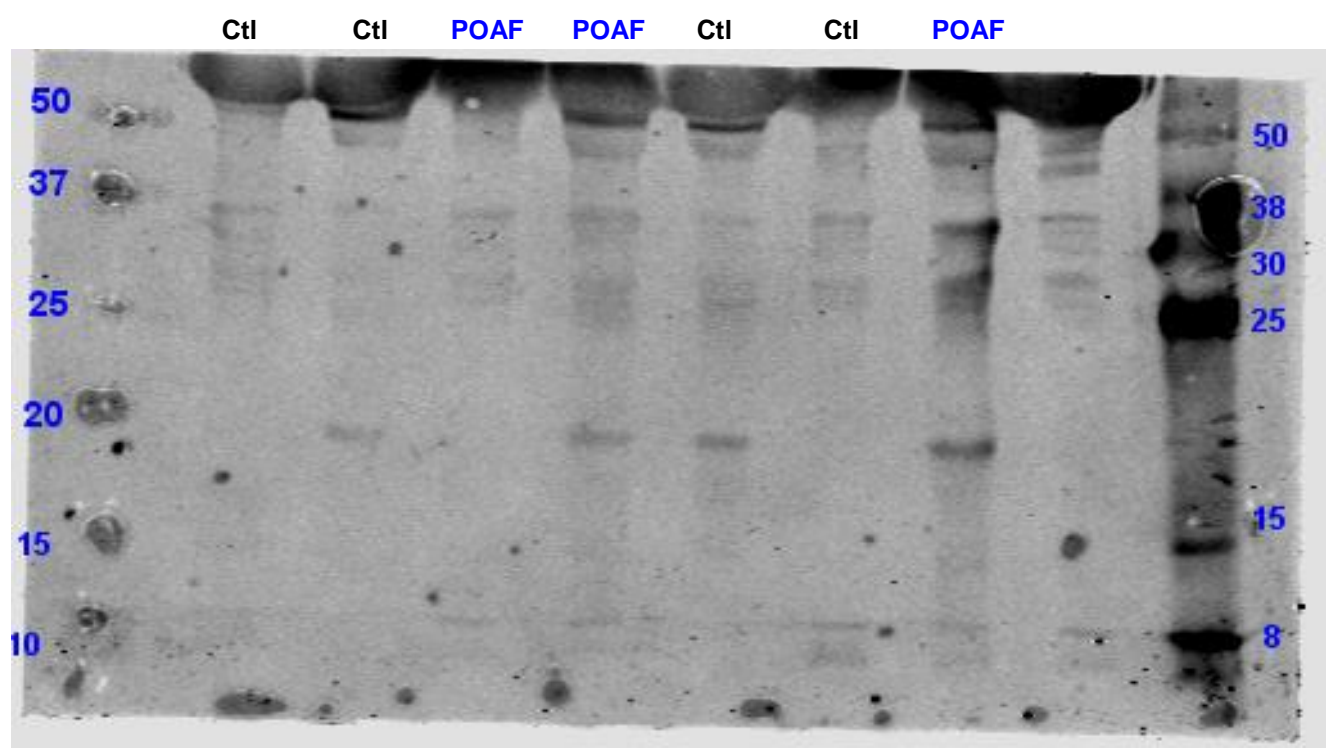

## Ponceau

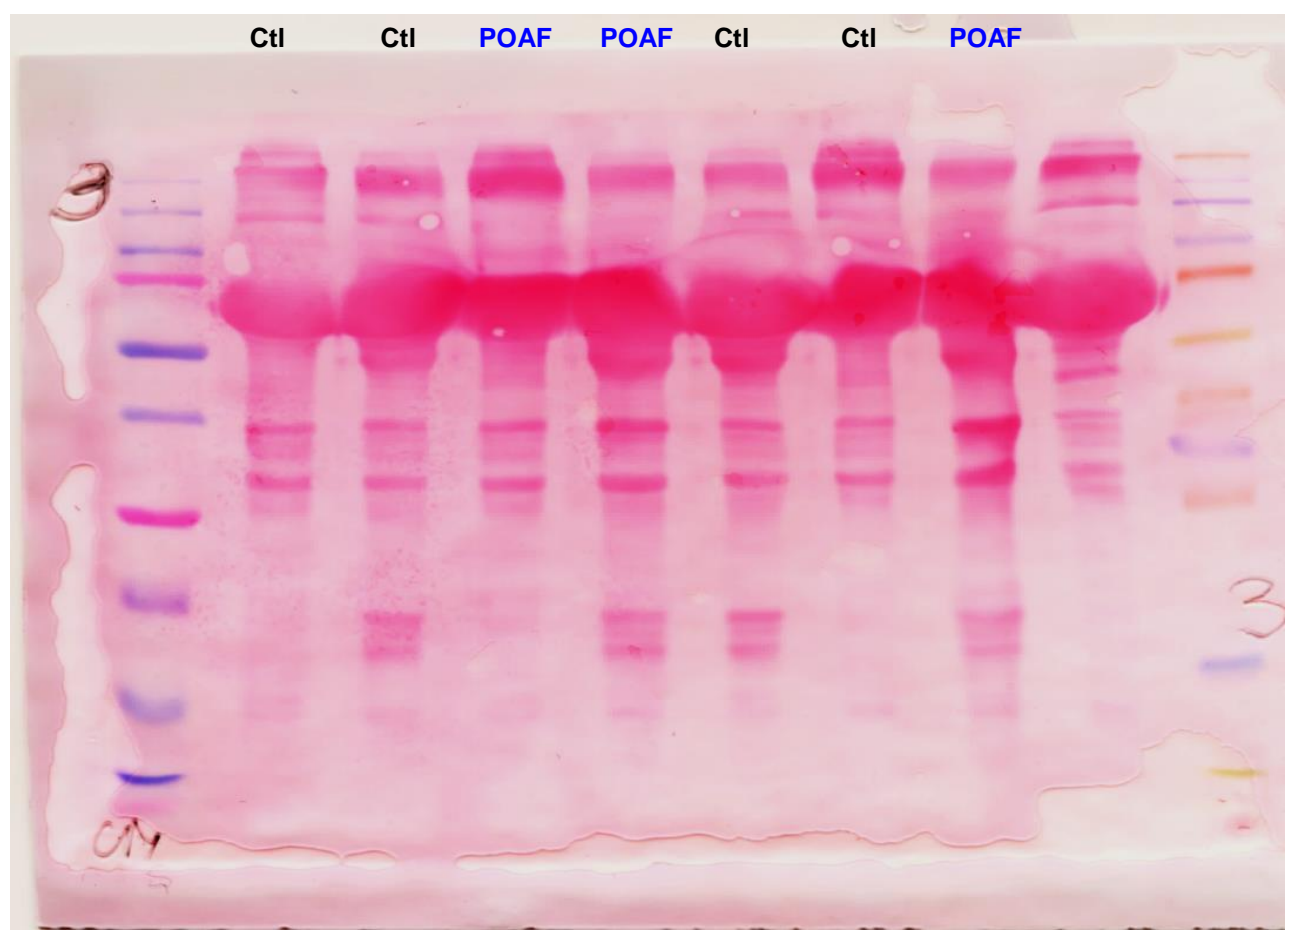

**Figure 6C – Human atrial cardiomyocytes**

# (Pro-)Caspase-1

Ctl Ctl POAF POAF Ctl Ctl POAF POAF

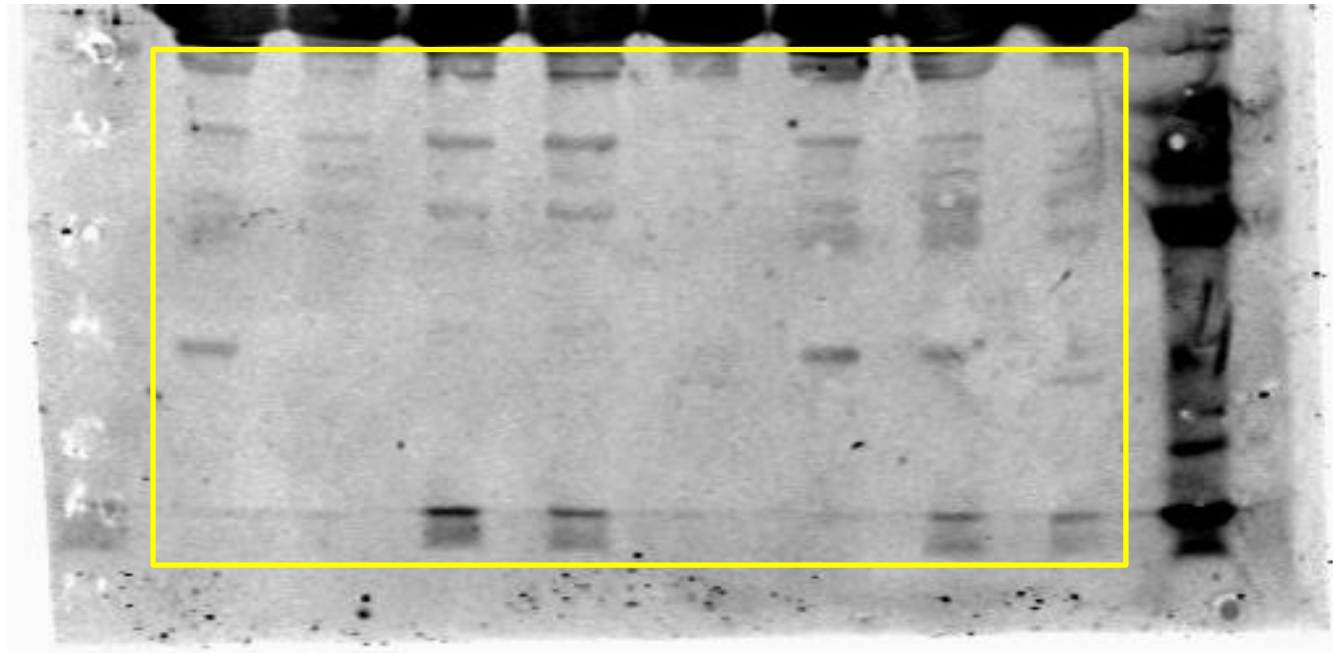

# Ponceau

Ctl Ctl POAF POAF Ctl Ctl POAF POAF

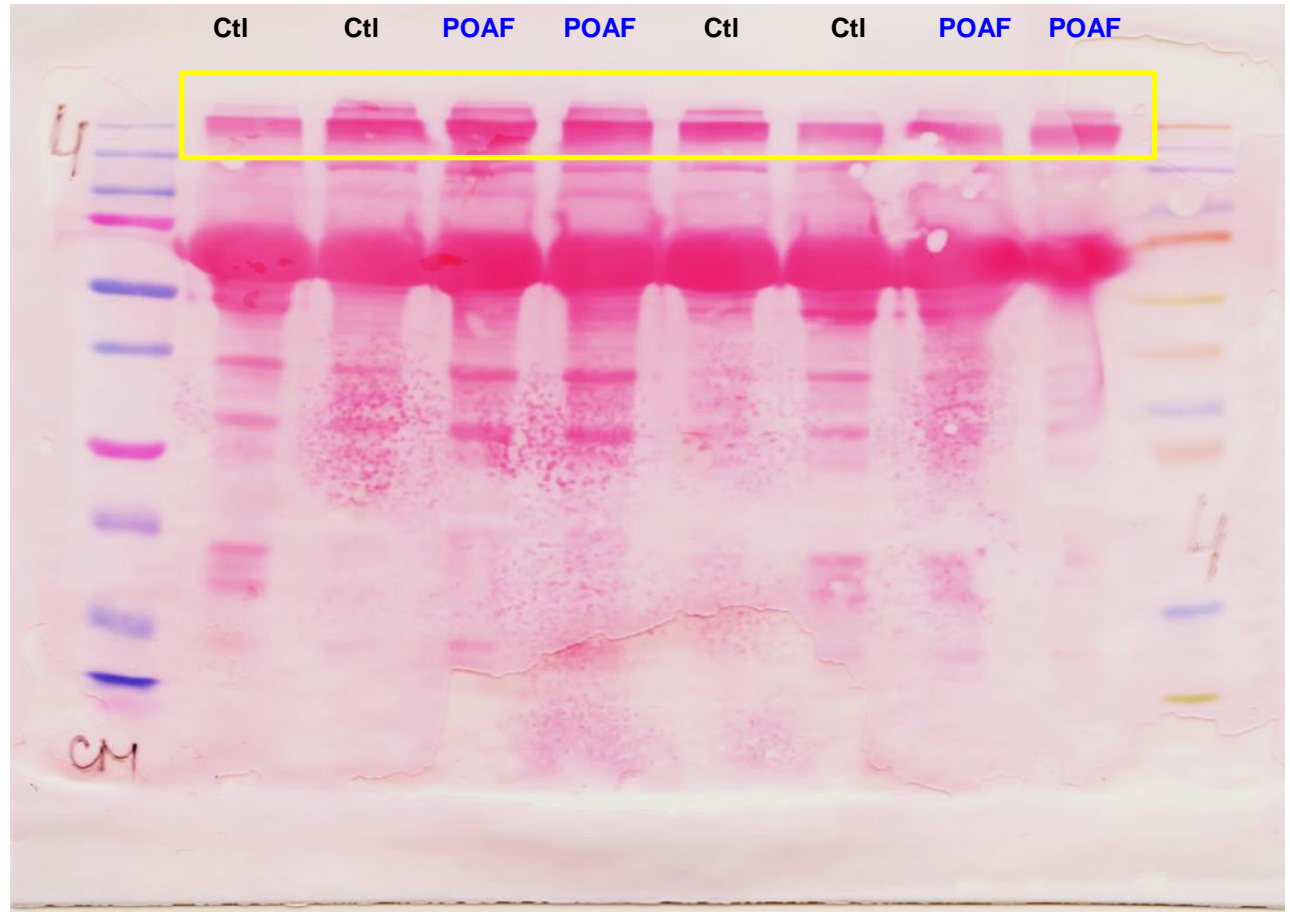

**Figure 6C – Human atrial cardiomyocytes**

# (Pro-)Interleukin-1 $\beta$

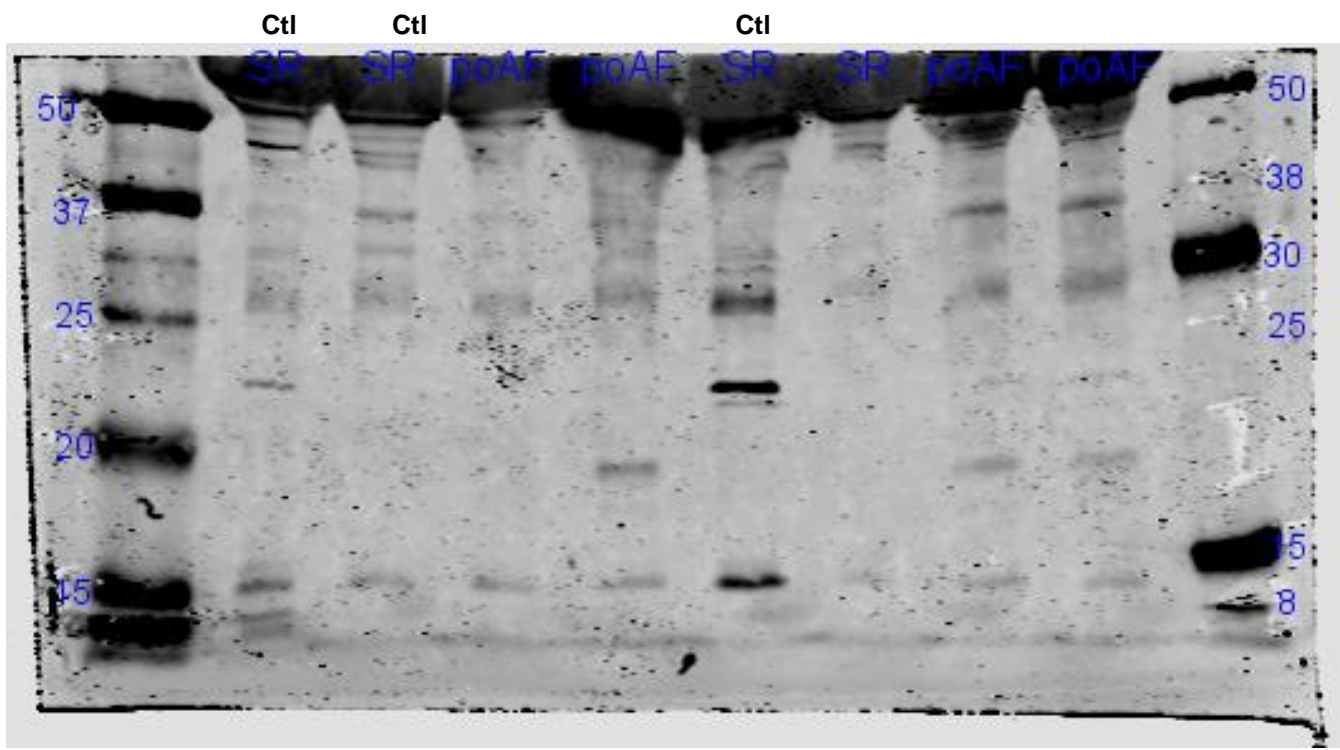

Ponceau

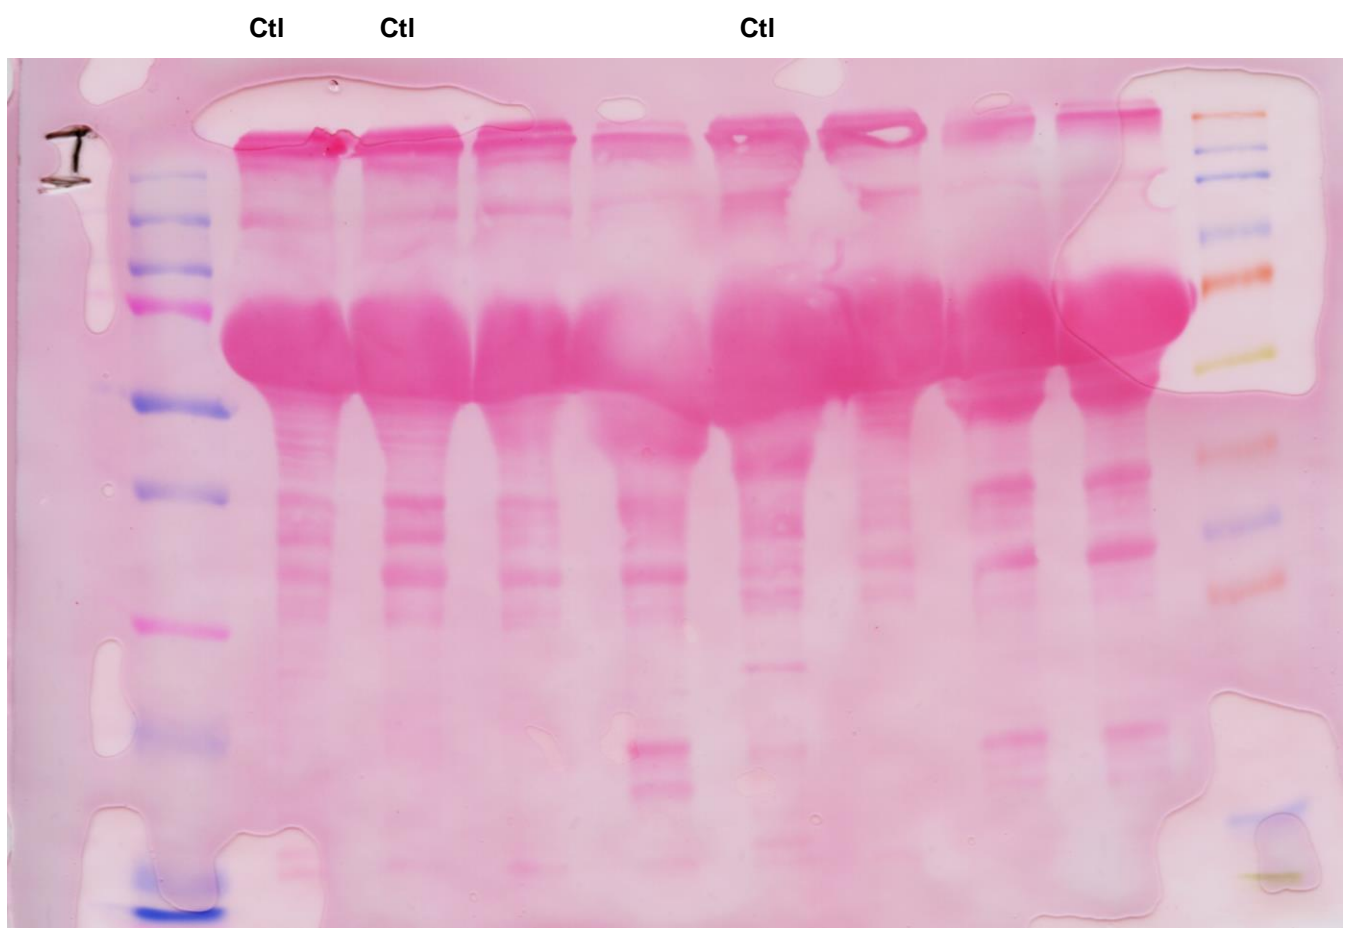

**Figure 6D – Human atrial cardiomyocytes**

# (Pro-)Interleukin-1 $\beta$

Ctl Ctl POAF Ctl Ctl POAF POAF

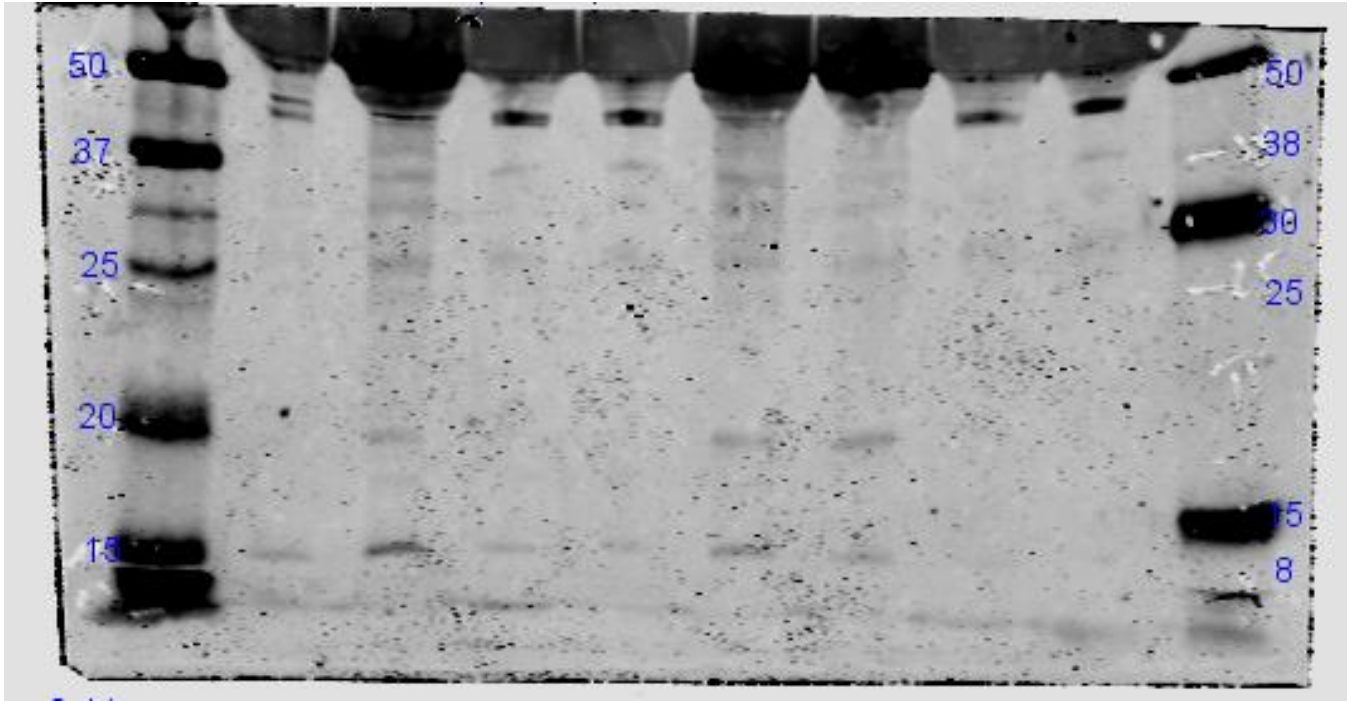

Ponceau

Ctl Ctl POAF Ctl Ctl POAF POAF

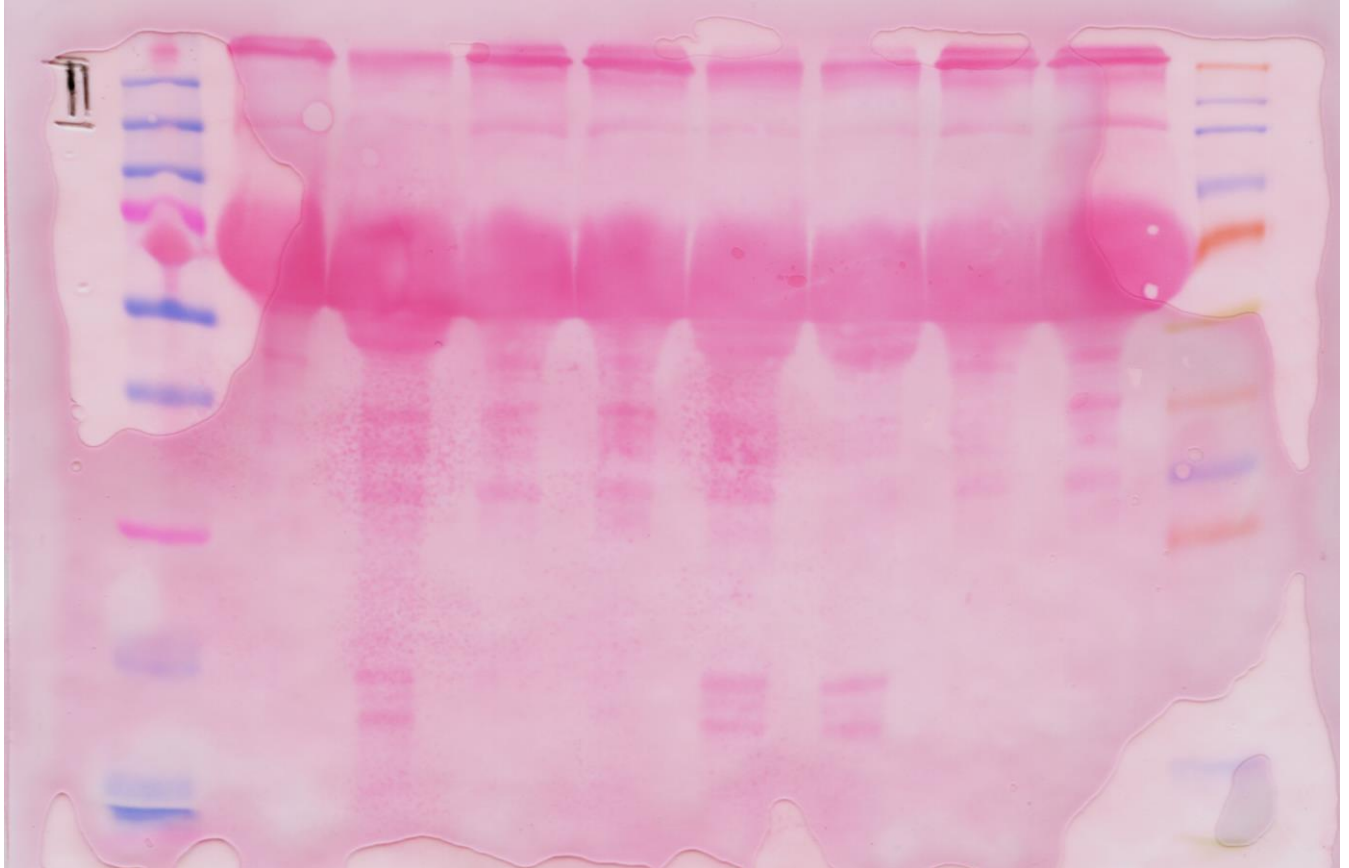

**Figure 6D – Human atrial cardiomyocytes**

# (Pro-)Interleukin-1 $\beta$

Ctl Ctl POAF POAF Ctl Ctl POAF POAF

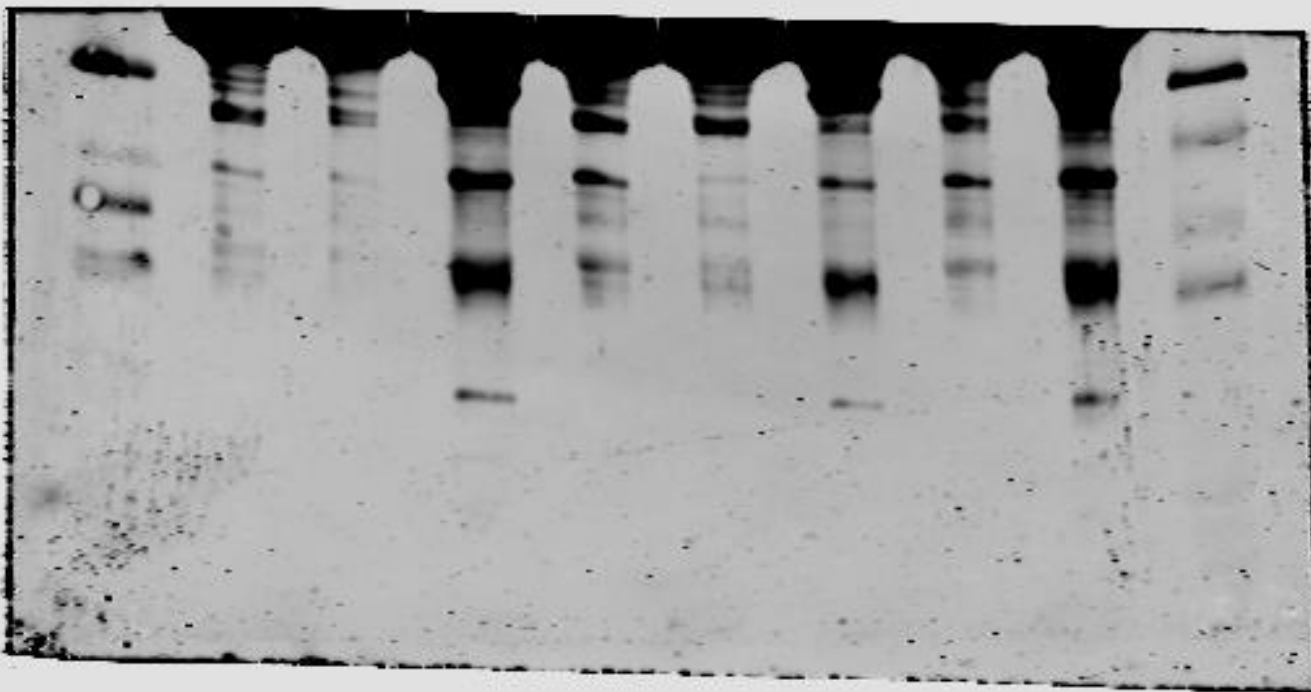

## Ponceau

Ctl Ctl POAF POAF Ctl Ctl POAF POAF

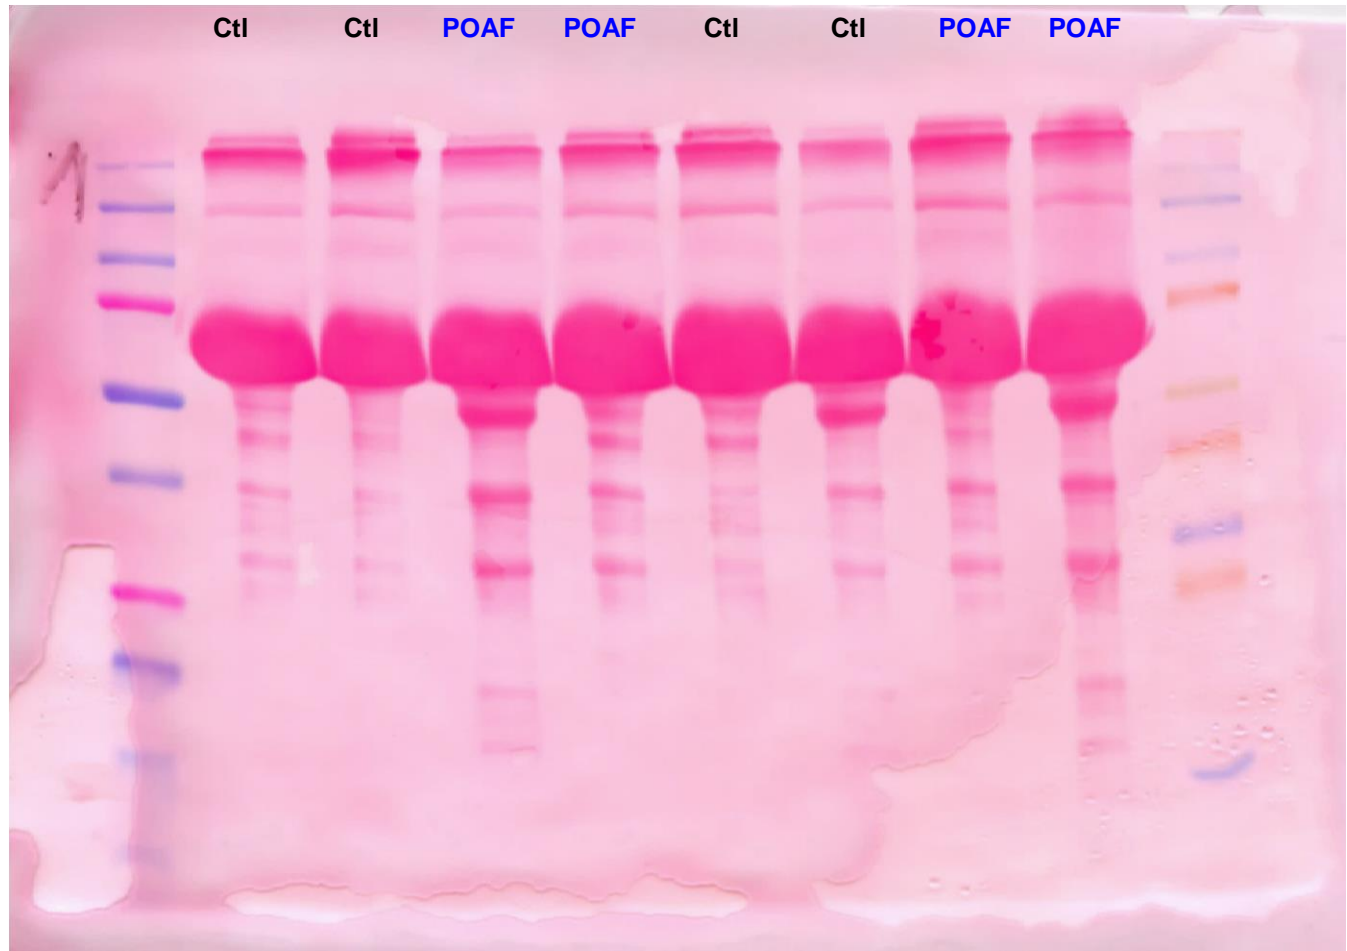

**Figure 6D – Human atrial cardiomyocytes**

# (Pro-)Interleukin-1 $\beta$

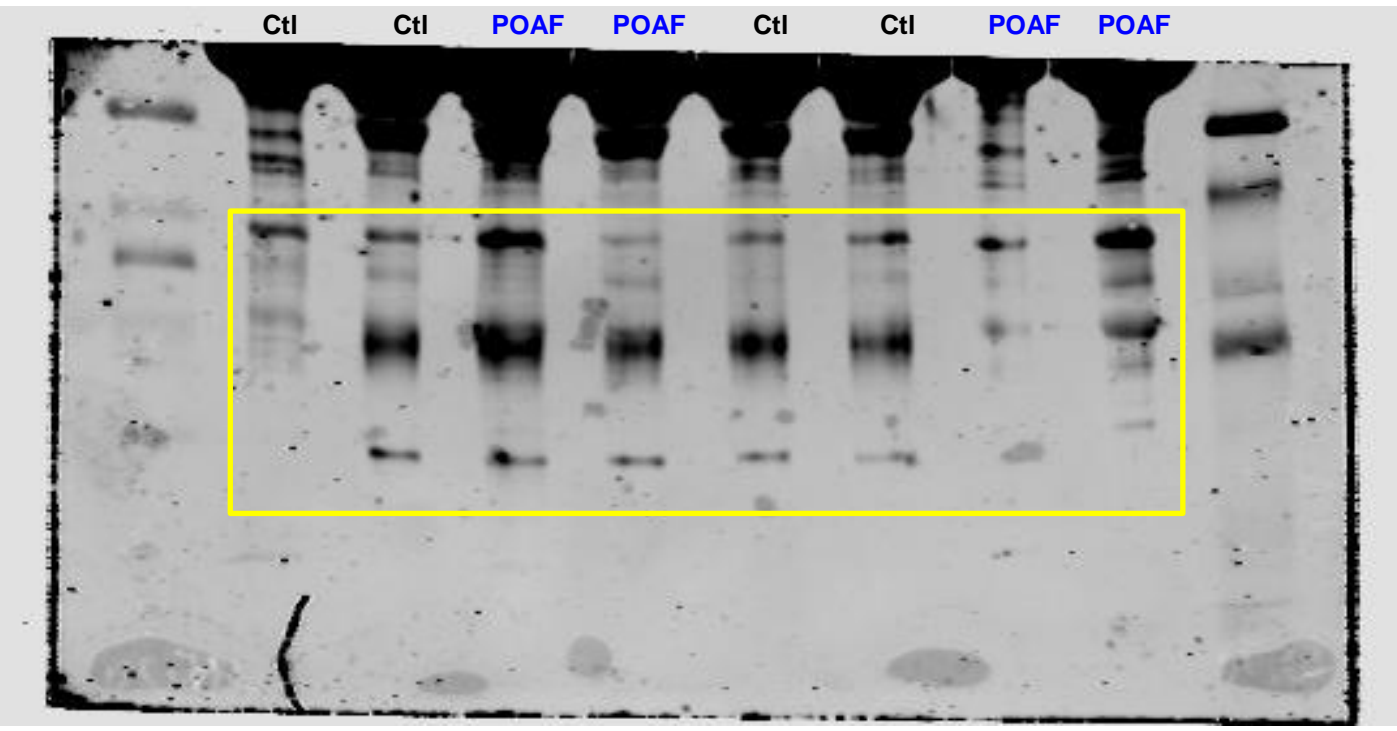

## Ponceau

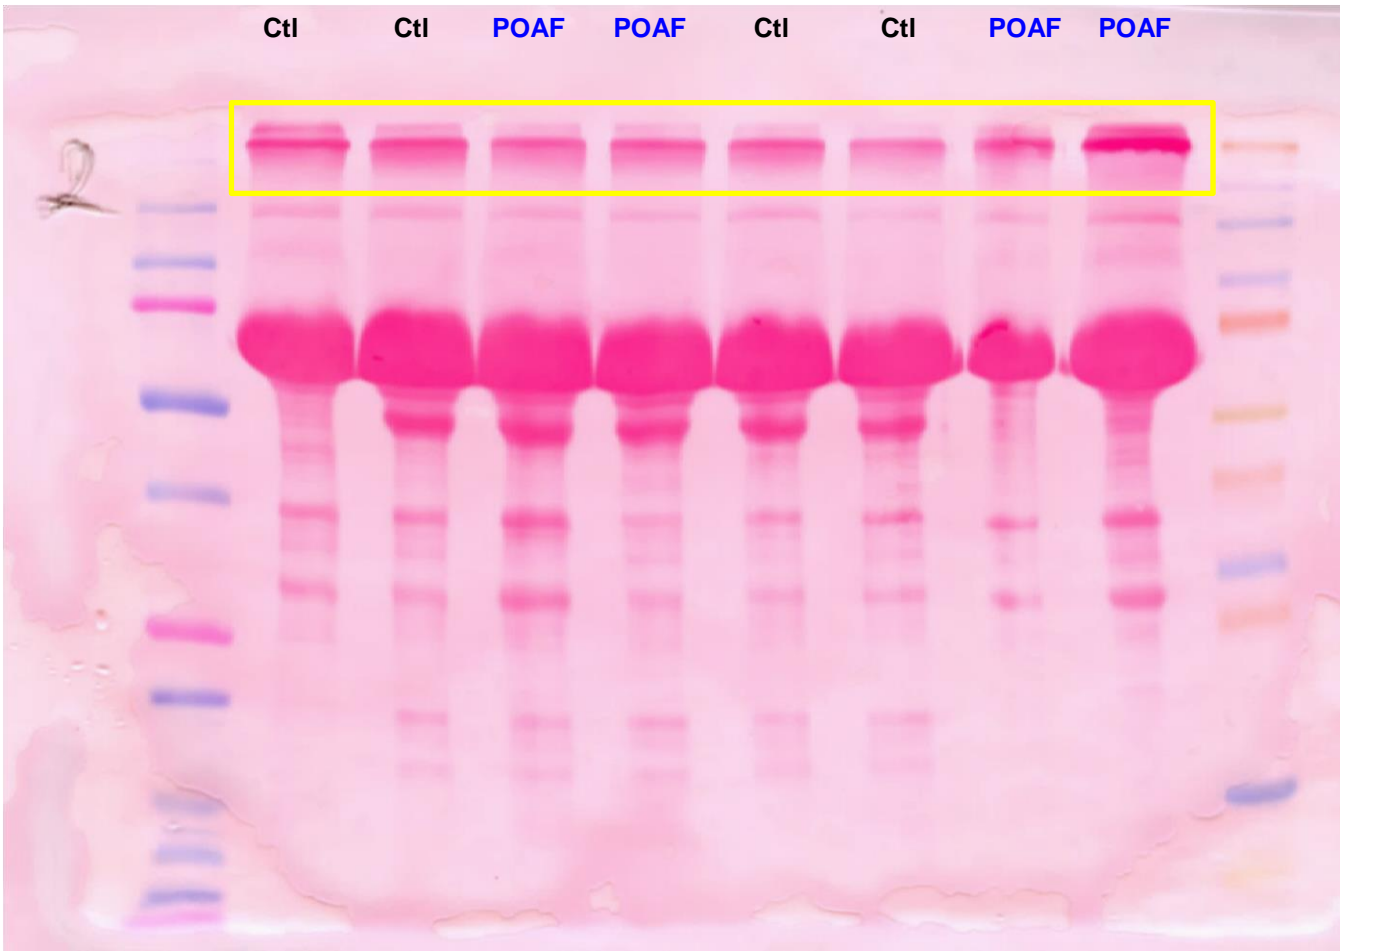

**Figure 6D – Human atrial cardiomyocytes**



# Gasdermin-D

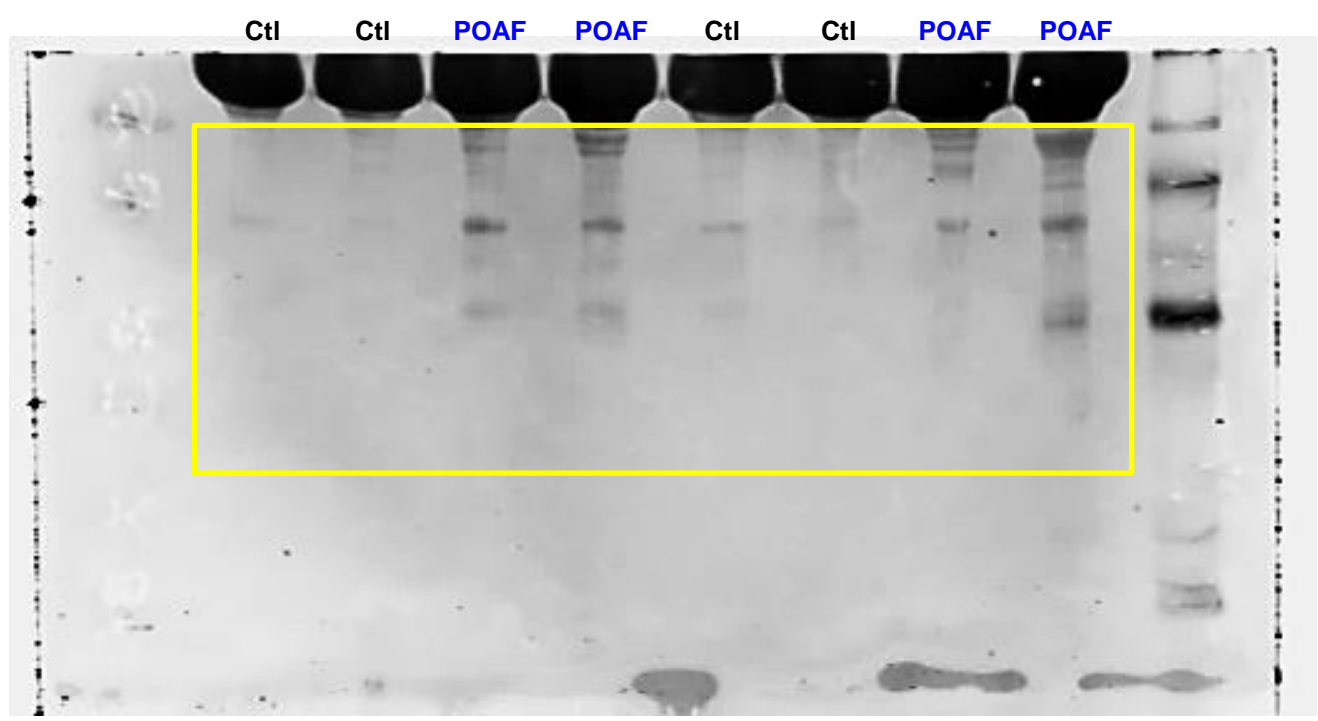

# Ponceau

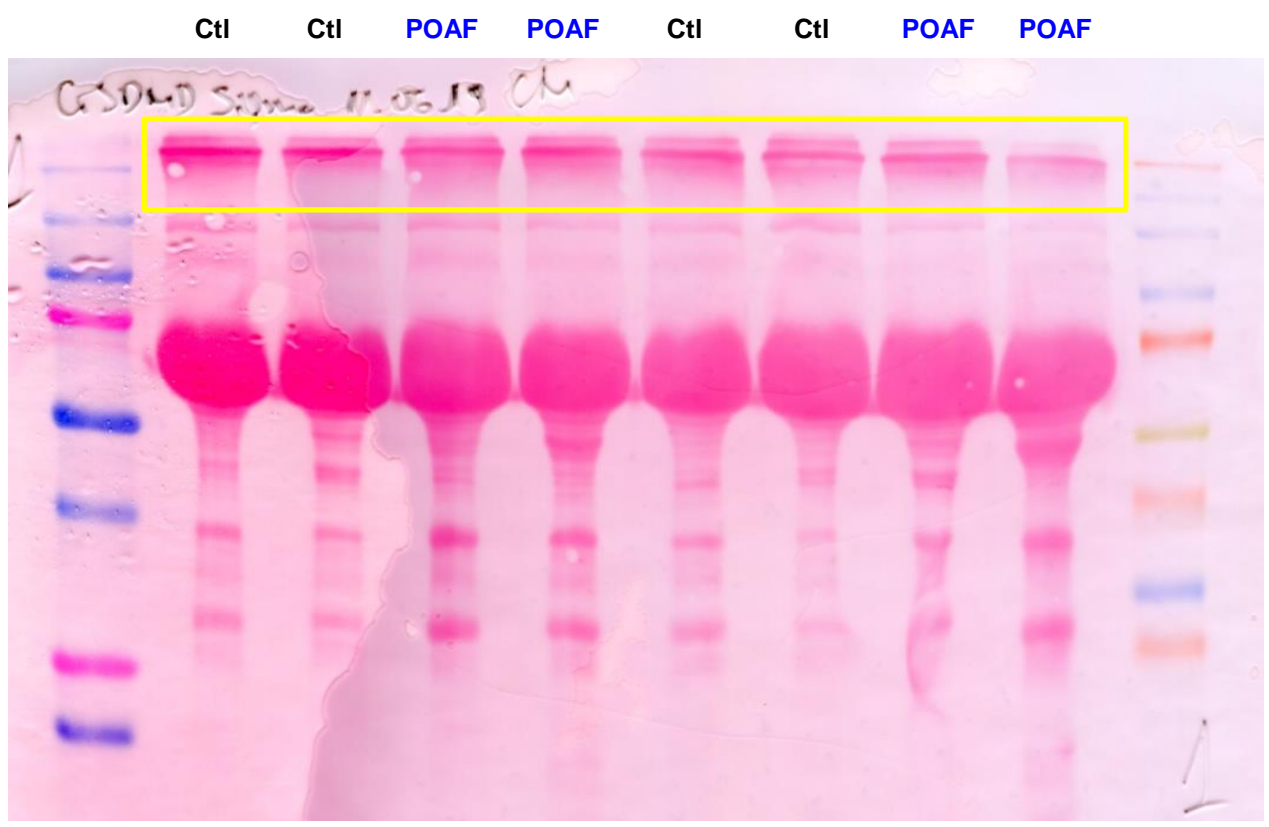

**Figure 6E – Human atrial cardiomyocytes**

# Gasdermin-D

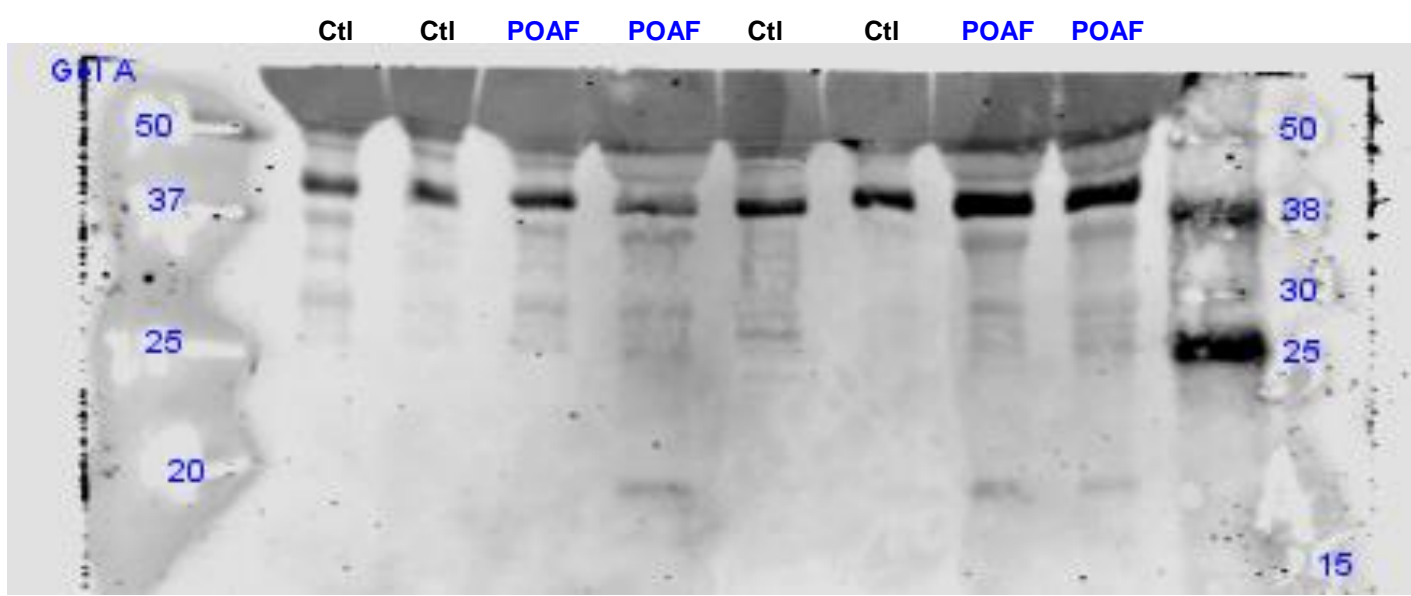

# Ponceau

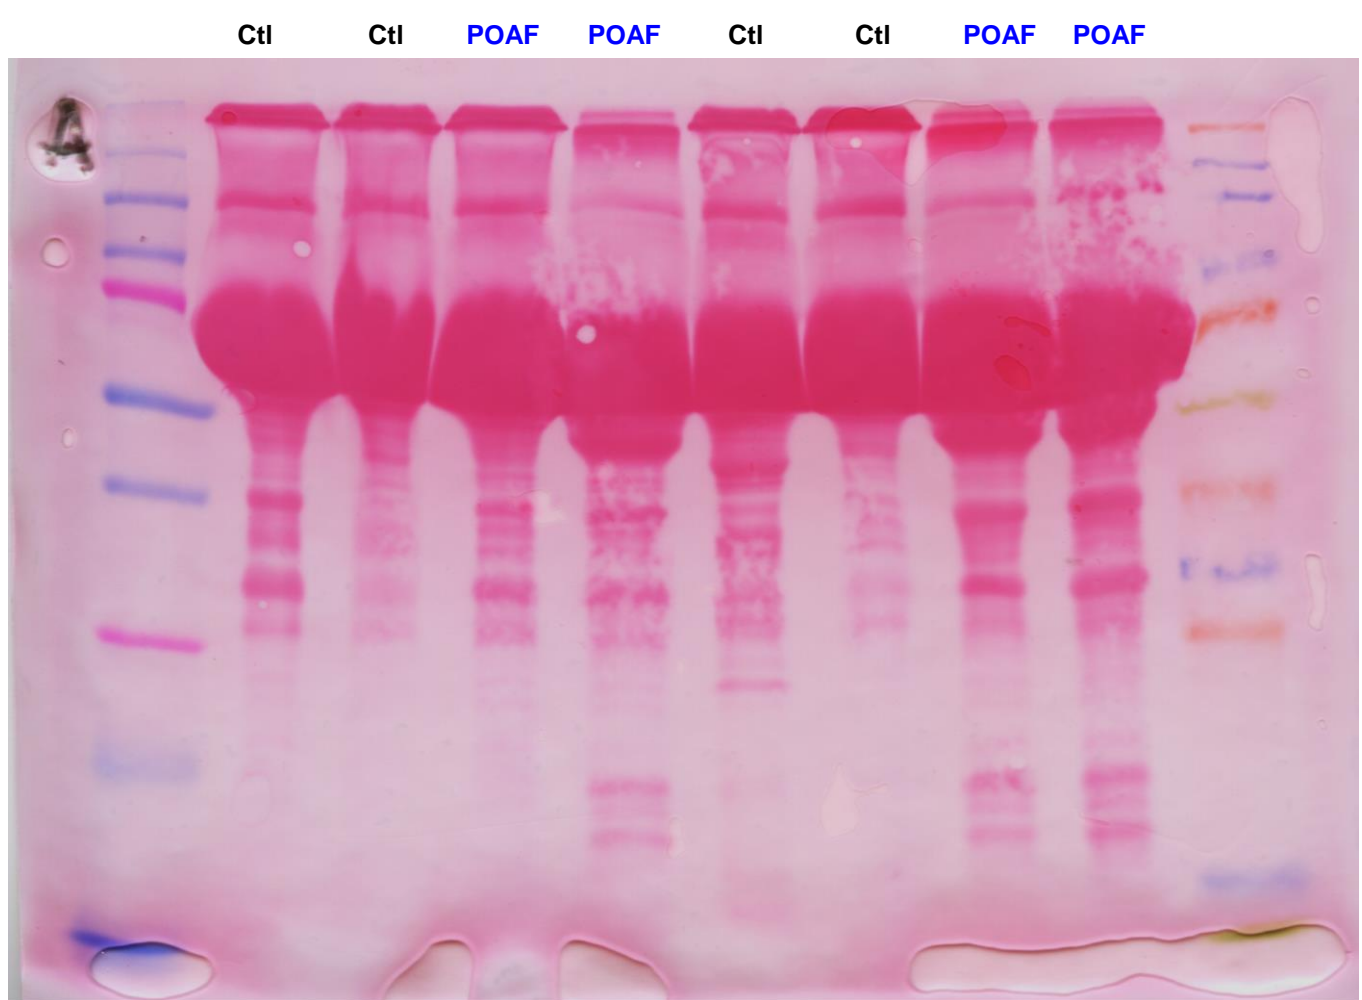

**Figure 6E – Human atrial cardiomyocytes**

# Gasdermin-D

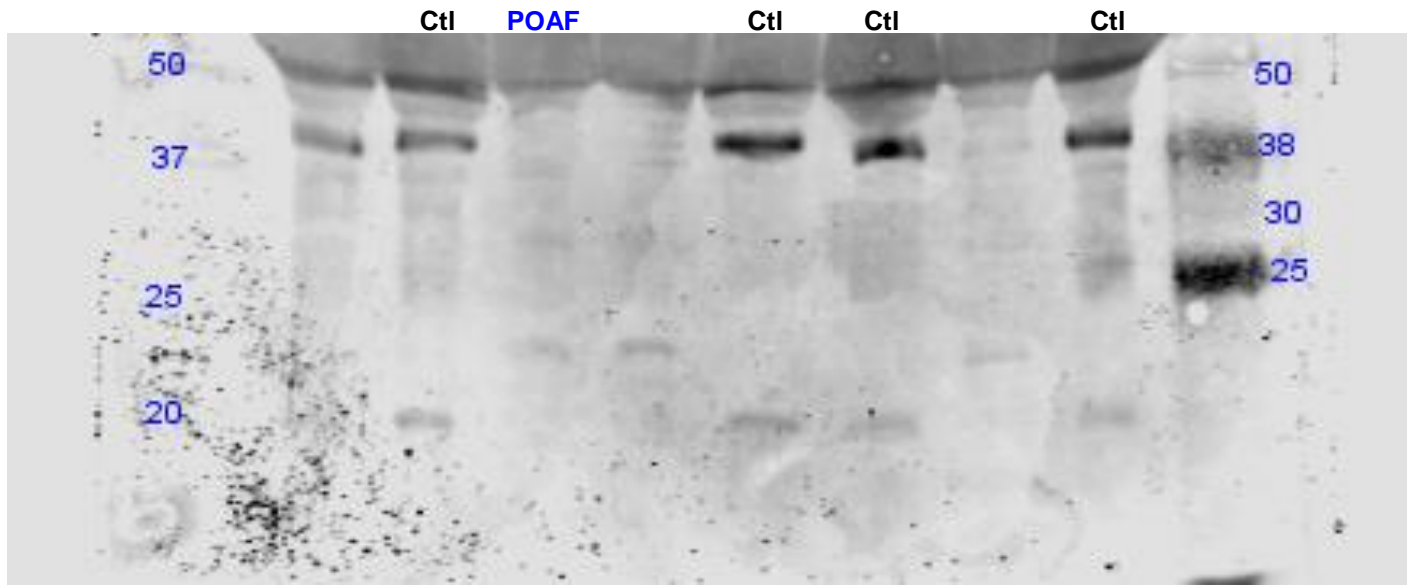

# Ponceau

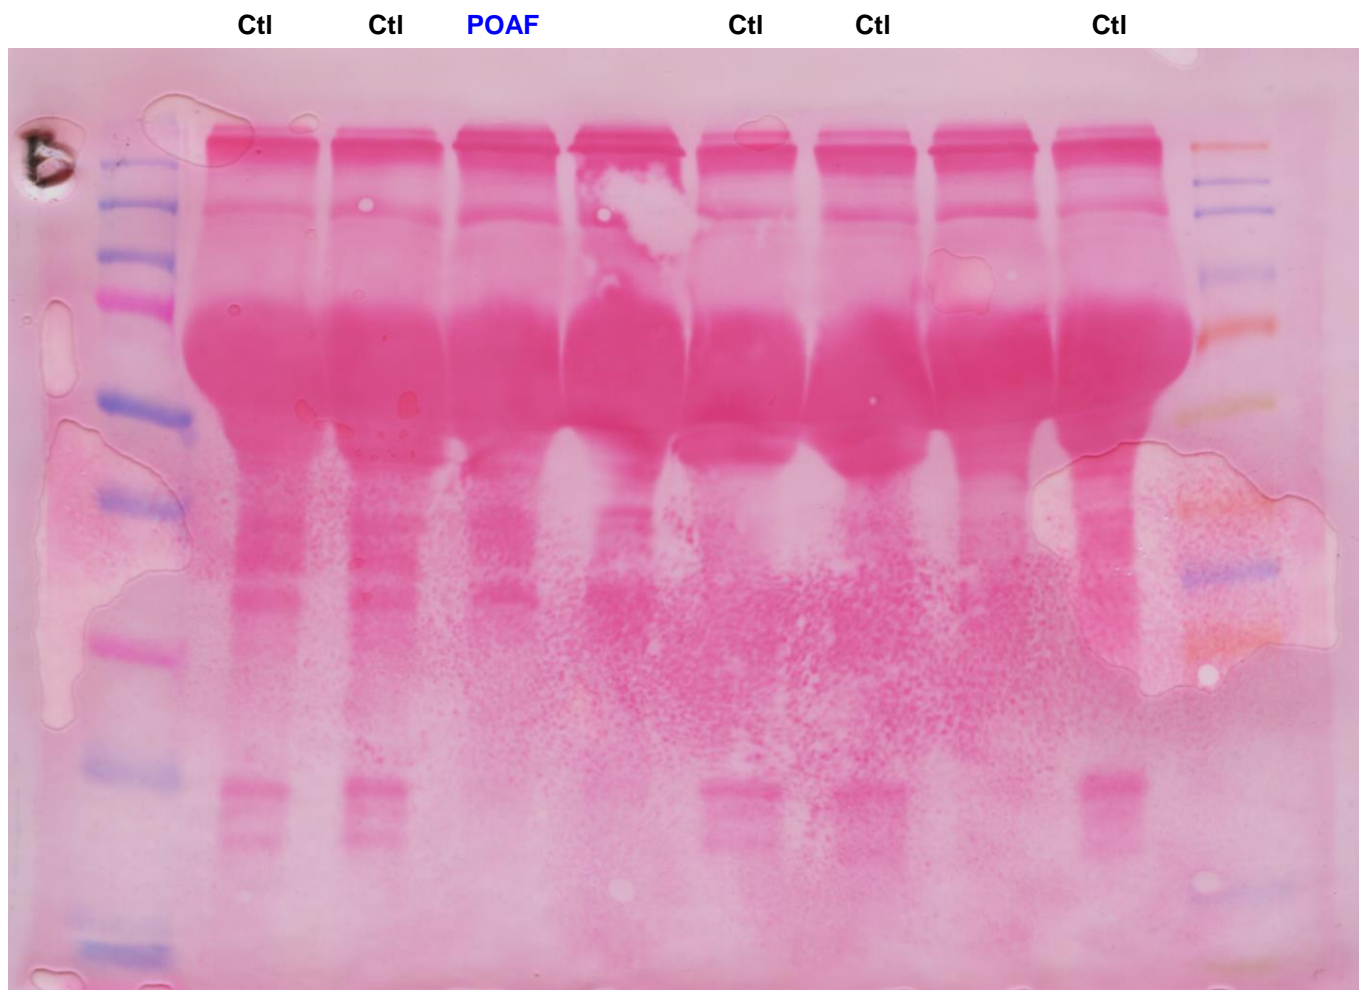

**Figure 6E – Human atrial cardiomyocytes**

# Ser2808-RyR2 (-IL-1 $\beta$ vs. IL-1 $\beta$ )

Gel 1 / 4

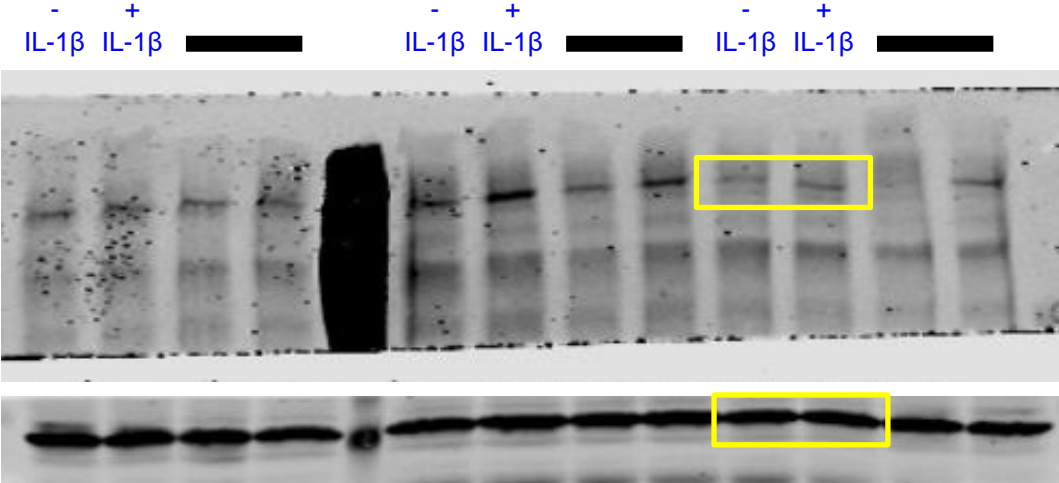

Gel 2 / 4

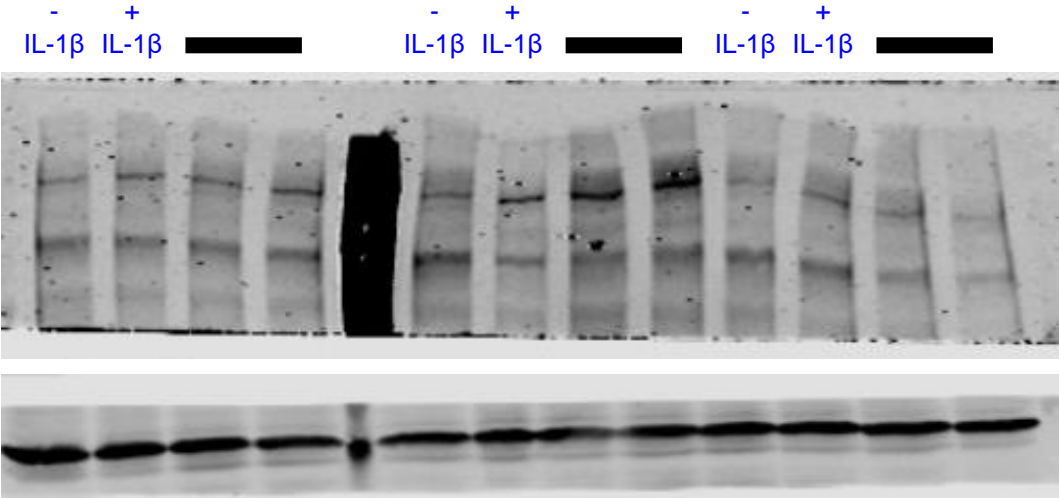

Figure 8B – HL1 cells

Excluded from this analysis

# Ser2808-RyR2 (-IL-1 $\beta$ vs. IL-1 $\beta$ )

Gel 3 / 4

IL-1 $\beta$  - IL-1 $\beta$  + IL-1 $\beta$  - IL-1 $\beta$  + IL-1 $\beta$

Ser2808  
-RyR2

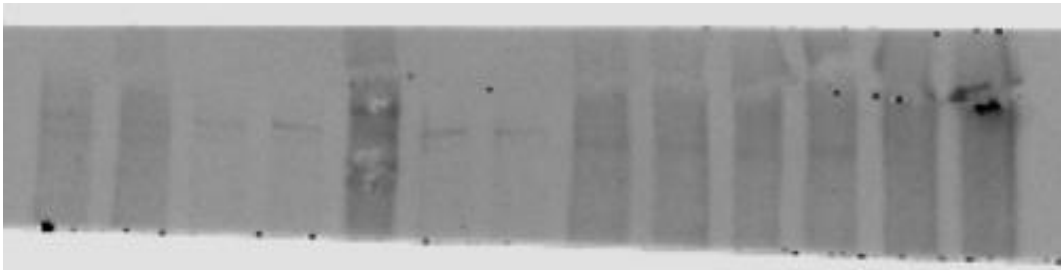

GAPDH

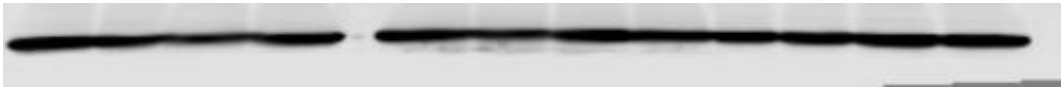

Gel 4 / 4

IL-1 $\beta$  - IL-1 $\beta$  + IL-1 $\beta$  - IL-1 $\beta$  + IL-1 $\beta$  - IL-1 $\beta$  + IL-1 $\beta$

Ser2808  
-RyR2

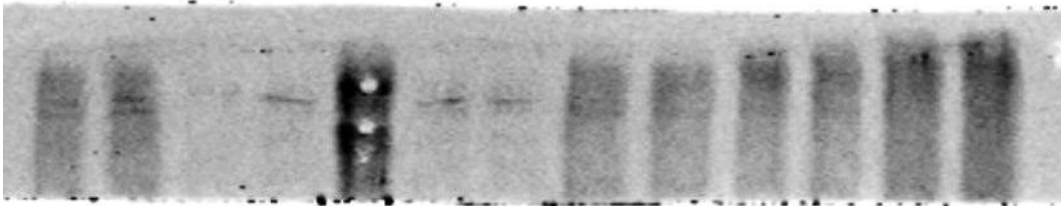

GAPDH

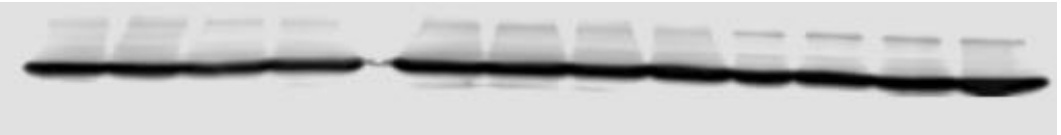

Figure 8B – HL1 cells

Excluded from this analysis

# Ser2808-RyR2 (KN-92 vs. KN-93)

Gel 1 / 5

KN-93 + IL-1 $\beta$    KN-92 + IL-1 $\beta$    KN-93 + IL-1 $\beta$    KN-92 + IL-1 $\beta$    KN-93 + IL-1 $\beta$    KN-92 + IL-1 $\beta$

Ser2808-RyR2

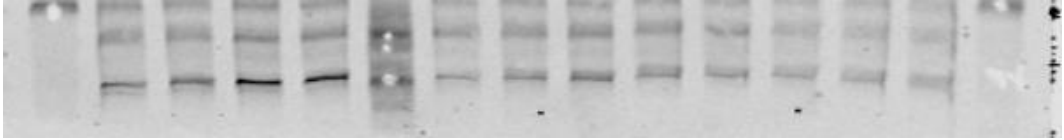

GAPDH

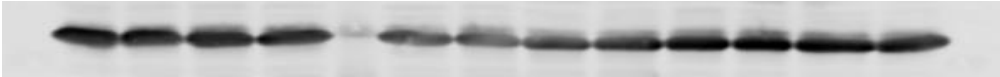

Gel 2 / 5

KN-93 + IL-1 $\beta$    KN-92 + IL-1 $\beta$    KN-93 + IL-1 $\beta$    KN-92 + IL-1 $\beta$    KN-93 + IL-1 $\beta$    KN-92 + IL-1 $\beta$

Ser2808-RyR2

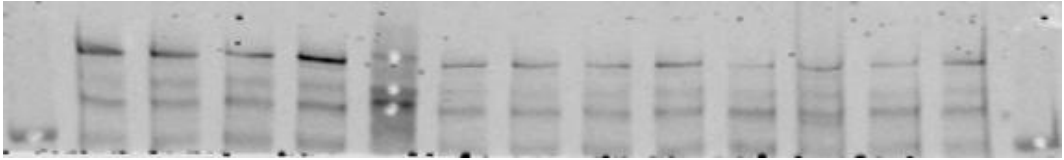

GAPDH

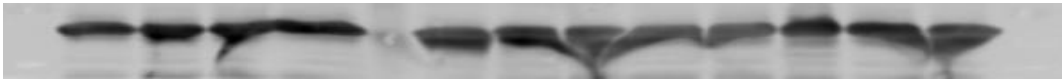

Gel 3 / 5

KN-93 + IL-1 $\beta$    KN-92 + IL-1 $\beta$    KN-93 + IL-1 $\beta$    KN-92 + IL-1 $\beta$    KN-93 + IL-1 $\beta$    KN-92 + IL-1 $\beta$

Ser2808-RyR2

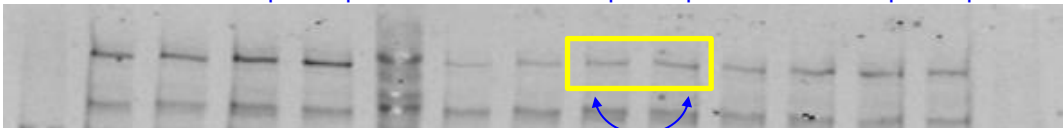

GAPDH

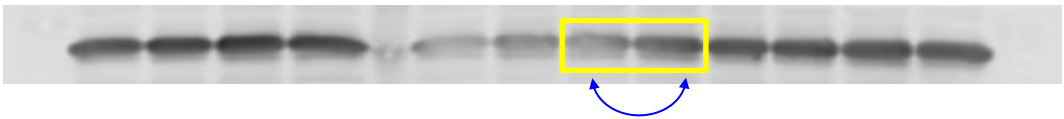

Figure 8B – HL1 cells

Excluded from this analysis

# Ser2808-RyR2 (KN-92 vs. KN-93)

Gel 4 / 5

KN- 93 +  
KN- 92 +  
IL-1 $\beta$  IL-1 $\beta$

Ser2808  
-RyR2

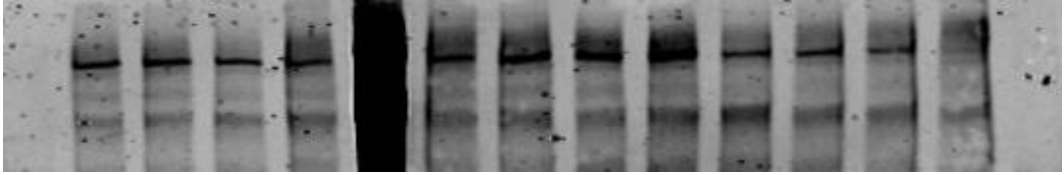

GAPDH

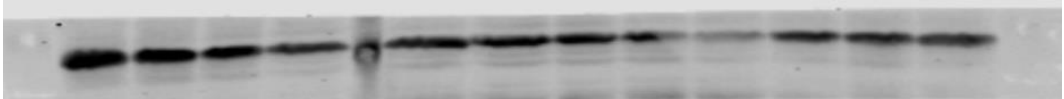

Gel 5 / 5

KN- 93 +    KN- 92 +                    KN- 93 +    KN- 92 +                    KN- 93 +    KN- 92 +  
IL-1 $\beta$  IL-1 $\beta$                     IL-1 $\beta$  IL-1 $\beta$                     IL-1 $\beta$  IL-1 $\beta$

Ser2808  
-RyR2

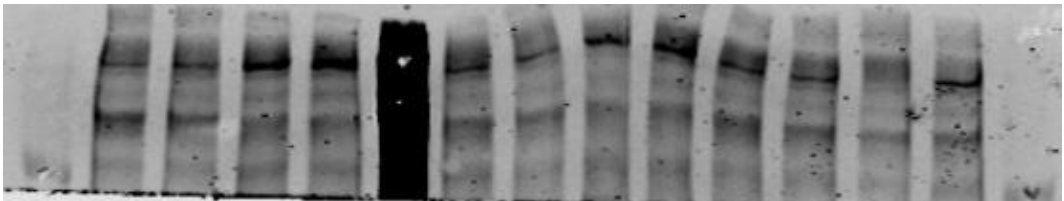

GAPDH

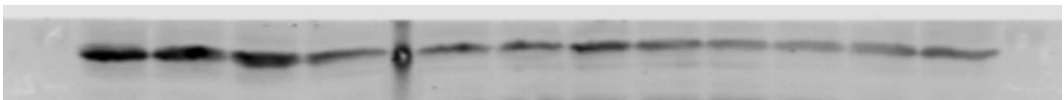

Figure 8B – HL1 cells

Excluded from this analysis

# Ser2814-RyR2 (-IL-1 $\beta$ vs. + IL-1 $\beta$ )

Gel 1 / 3

- + - + - + - + - + - +  
IL-1 $\beta$  IL-1 $\beta$

Ser2814  
-RyR2

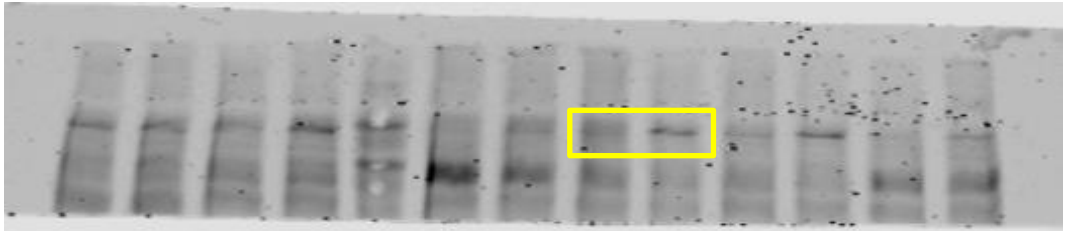

GAPDH

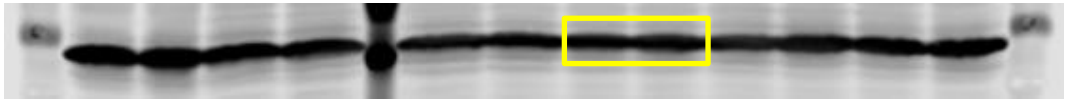

Gel 2 / 3

- + - + - + - + - + - +  
IL-1 $\beta$  IL-1 $\beta$

Ser2814  
-RyR2

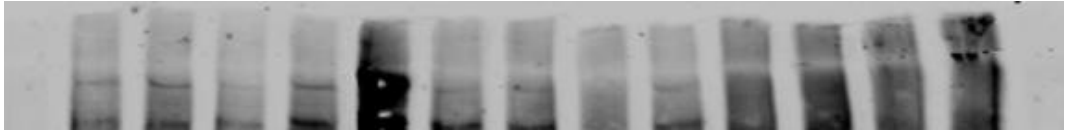

GAPDH

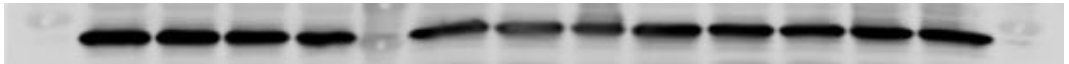

Gel 3 / 3

- + - + - + - + - + - +  
IL-1 $\beta$  IL-1 $\beta$

Ser2814  
-RyR2

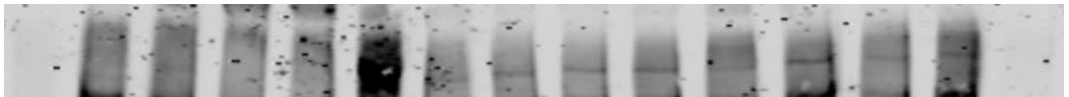

GAPDH

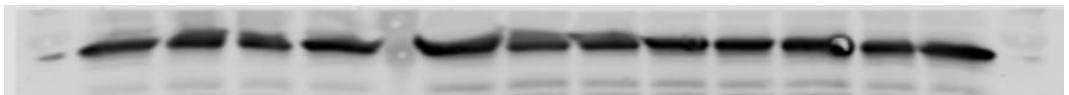

Figure 8B – HL1 cells

Excluded from this analysis



# Ser2814-RyR2 (KN-92 vs. KN-93)

Gel 1 / 4

KN- 93 + IL-1 $\beta$     KN- 92 + IL-1 $\beta$     KN- 93 + IL-1 $\beta$     KN- 92 + IL-1 $\beta$

Ser2814-RyR2

GAPDH

Gel 2 / 4

KN- 93 + IL-1 $\beta$     KN- 92 + IL-1 $\beta$     KN- 93 + IL-1 $\beta$     KN- 92 + IL-1 $\beta$     KN- 93 + IL-1 $\beta$     KN- 92 + IL-1 $\beta$

Ser2814-RyR2

GAPDH

Gel 3 / 4

KN- 92 + IL-1 $\beta$     KN- 93 + IL-1 $\beta$     KN- 92 + IL-1 $\beta$     KN- 93 + IL-1 $\beta$

Ser2814-RyR2

GAPDH

Gel 4 / 4

KN- 92 + IL-1 $\beta$     KN- 93 + IL-1 $\beta$     KN- 92 + IL-1 $\beta$     KN- 93 + IL-1 $\beta$     KN- 92 + IL-1 $\beta$     KN- 93 + IL-1 $\beta$

Ser2814-RyR2

GAPDH

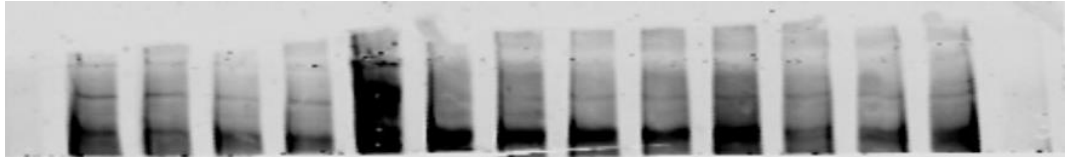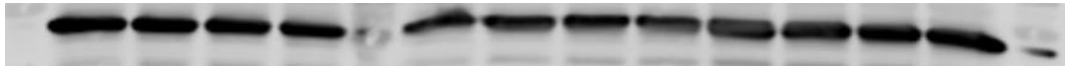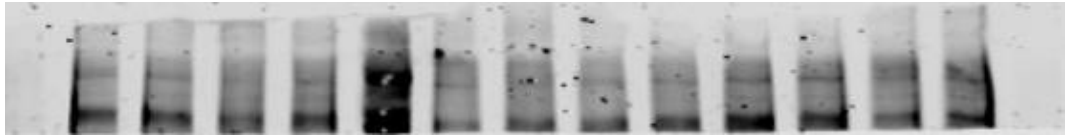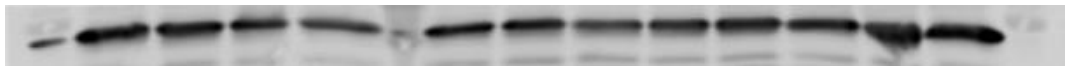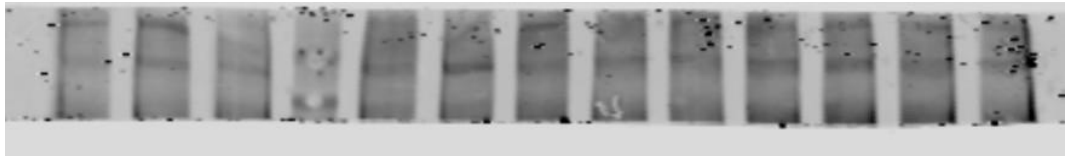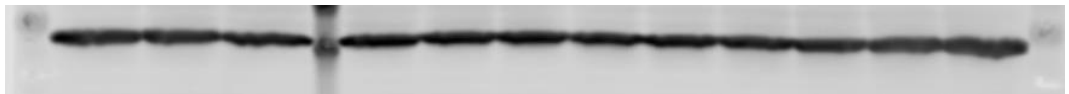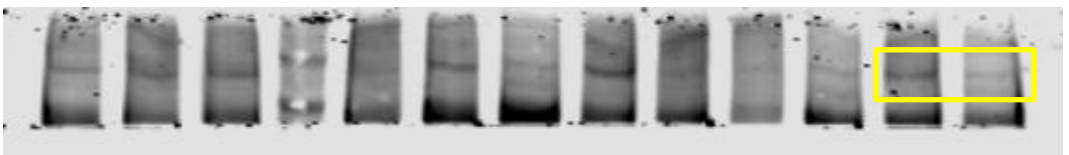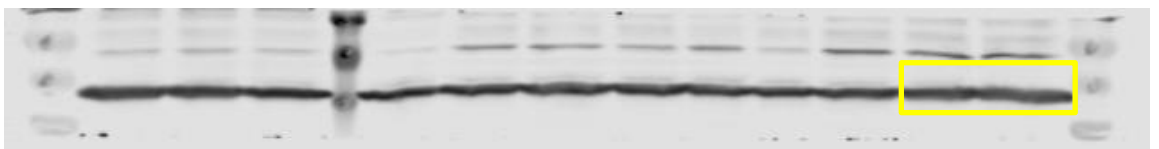

Figure 8B – HL1 cells

Excluded from this analysis

# Ser16-PLB (-IL-1 $\beta$ vs. + IL-1 $\beta$ )

Gel 1 / 5

- + - +  
IL-1 $\beta$  IL-1 $\beta$  IL-1 $\beta$  IL-1 $\beta$

Ser16  
-PLB

GAPDH

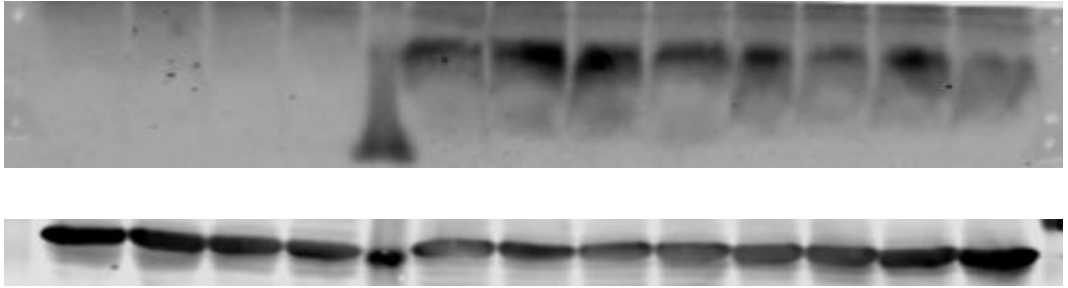

Gel 2 / 5

- + - + - +  
IL-1 $\beta$  IL-1 $\beta$  IL-1 $\beta$  IL-1 $\beta$  IL-1 $\beta$  IL-1 $\beta$

Ser16  
-PLB

GAPDH

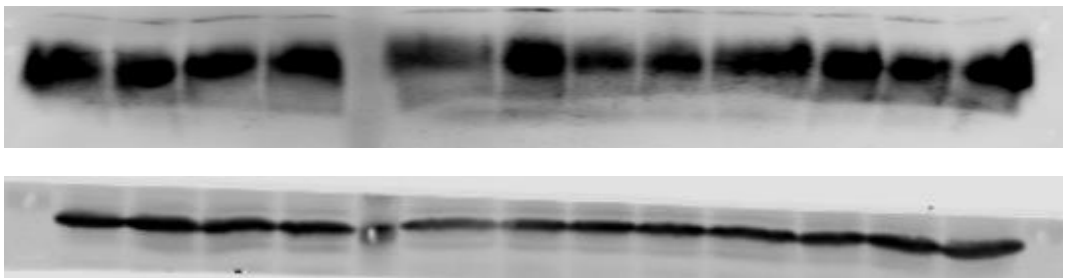

Gel 3 / 5

- + - + - +  
IL-1 $\beta$  IL-1 $\beta$  IL-1 $\beta$  IL-1 $\beta$  IL-1 $\beta$  IL-1 $\beta$

Ser16  
-PLB

GAPDH

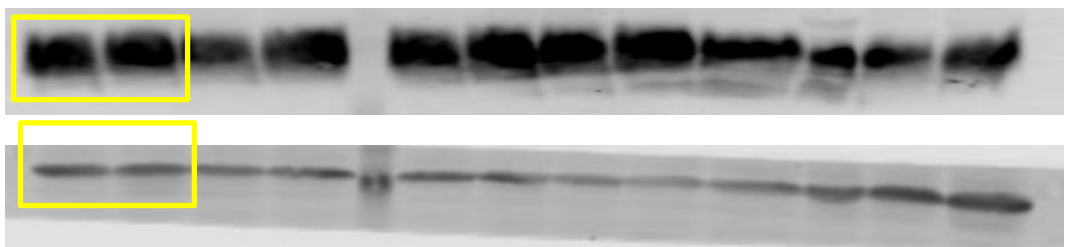

Figure 8B – HL1 cells

Excluded from this analysis

# Ser16-PLB (-IL-1β vs. + IL-1β)

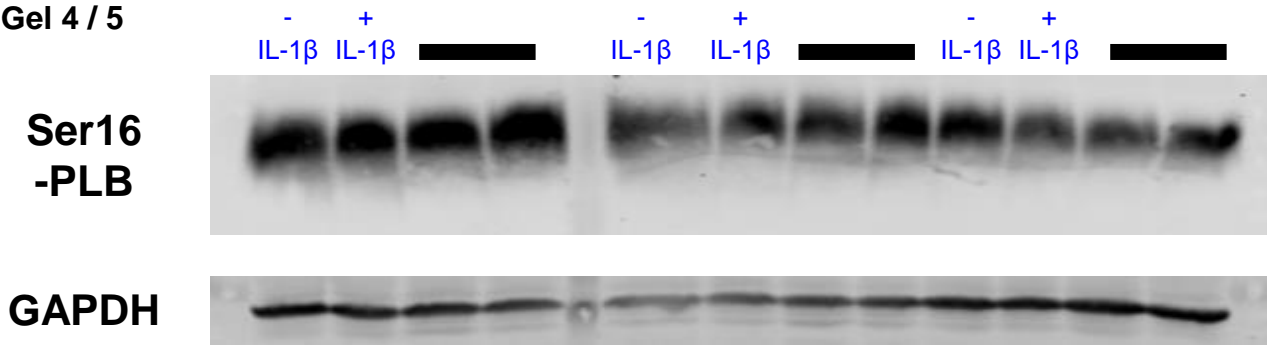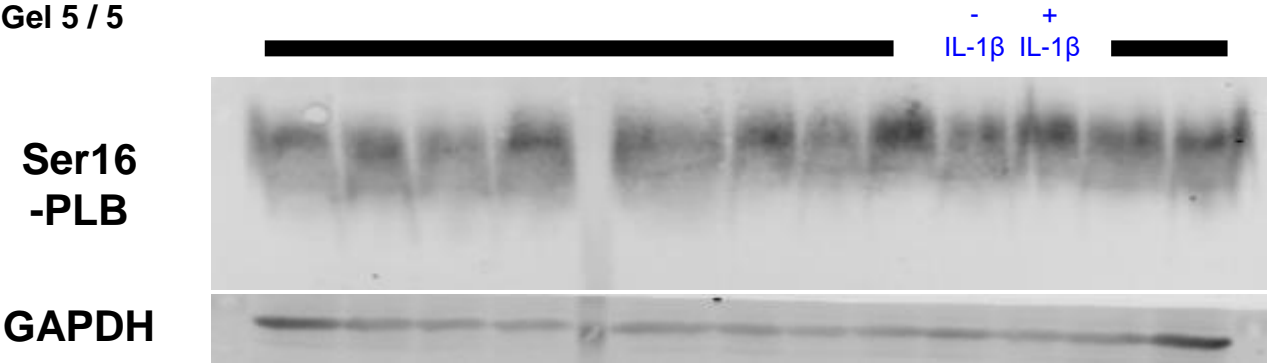

Figure 8B – HL1 cells

Excluded from this analysis

# Ser16-PLB (KN-92 vs. KN-93)

Gel 1 / 4

KN- 93 + IL-1 $\beta$    KN- 92 + IL-1 $\beta$    KN- 93 + IL-1 $\beta$    KN- 92 + IL-1 $\beta$    KN- 93 + IL-1 $\beta$    KN- 92 + IL-1 $\beta$

Ser16-PLB

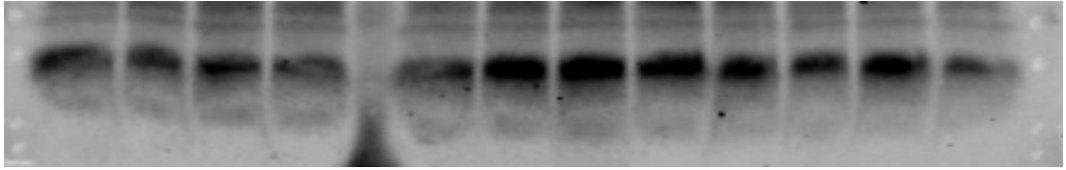

GAPDH

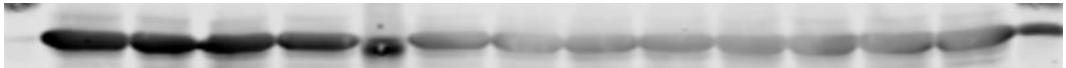

Gel 2 / 4

KN- 93 + IL-1 $\beta$    KN- 92 + IL-1 $\beta$    KN- 93 + IL-1 $\beta$    KN- 92 + IL-1 $\beta$    KN- 93 + IL-1 $\beta$    KN- 92 + IL-1 $\beta$

Ser16-PLB

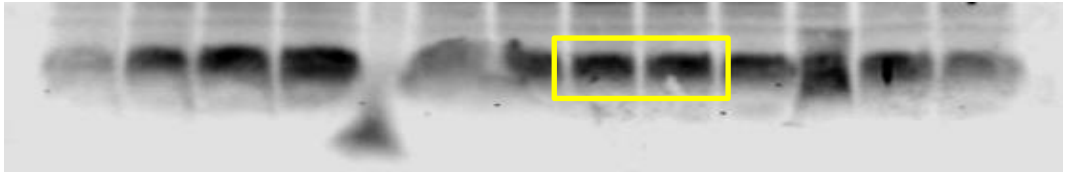

GAPDH

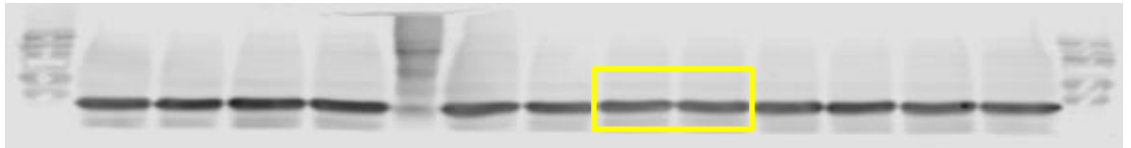

Gel 3 / 4

KN- 93 + IL-1 $\beta$    KN- 92 + IL-1 $\beta$    KN- 93 + IL-1 $\beta$    KN- 92 + IL-1 $\beta$    KN- 93 + IL-1 $\beta$    KN- 92 + IL-1 $\beta$

Ser16-PLB

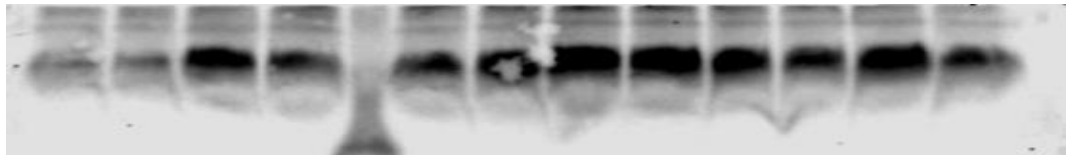

GAPDH

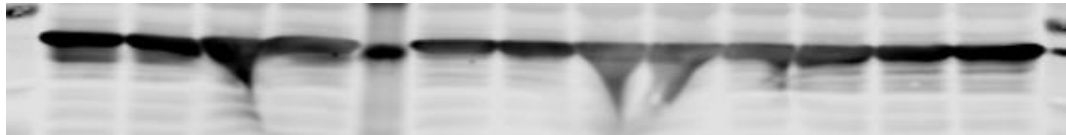

Gel 4 / 4

KN- 93 + IL-1 $\beta$    KN- 92 + IL-1 $\beta$    KN- 93 + IL-1 $\beta$    KN- 92 + IL-1 $\beta$

Ser16-PLB

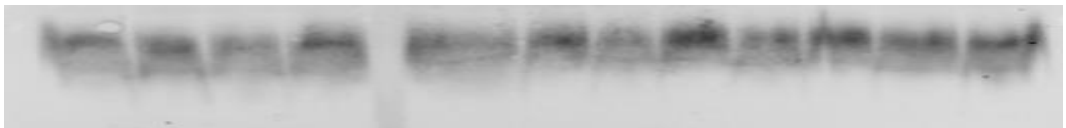

GAPDH

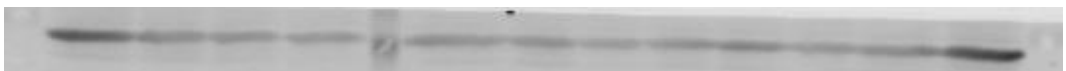

Figure 8B – HL1 cells

Excluded from this analysis

# Thr17-PLB (-IL-1 $\beta$ vs. + IL-1 $\beta$ )

Gel 1 / 5

- +      - +      - +  
IL-1 $\beta$  IL-1 $\beta$       IL-1 $\beta$  IL-1 $\beta$       IL-1 $\beta$  IL-1 $\beta$

Thr17  
-PLB

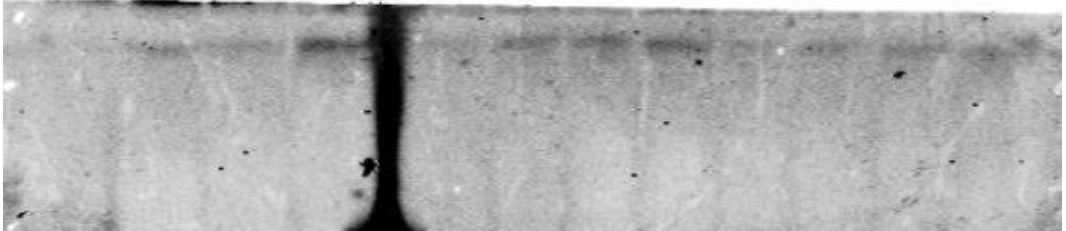

GAPDH

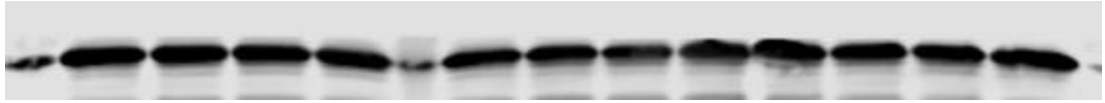

Gel 2 / 5

- +      - +      - +  
IL-1 $\beta$  IL-1 $\beta$       IL-1 $\beta$  IL-1 $\beta$       IL-1 $\beta$  IL-1 $\beta$

Thr17  
-PLB

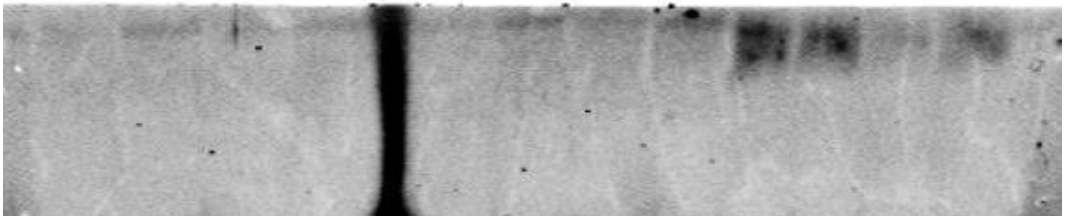

GAPDH

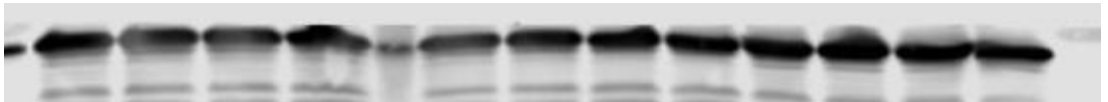

Gel 3 / 5

- +      - +      - +  
IL-1 $\beta$  IL-1 $\beta$       IL-1 $\beta$  IL-1 $\beta$       IL-1 $\beta$  IL-1 $\beta$

Thr17  
-PLB

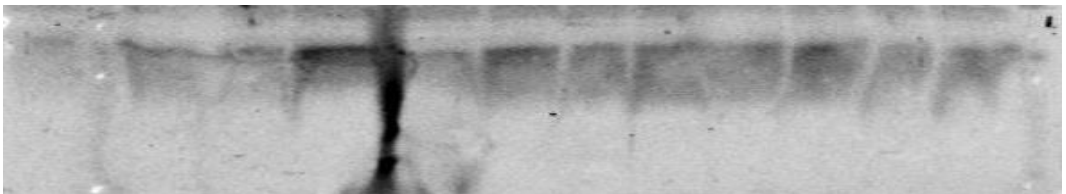

GAPDH

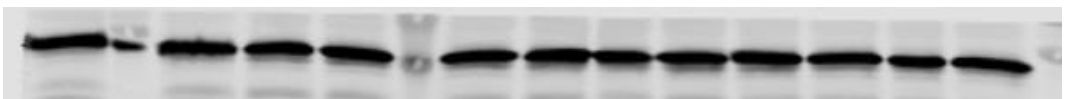

**Figure 8B – HL1 cells**

Excluded from this analysis

# Thr17-PLB (-IL-1 $\beta$ vs. + IL-1 $\beta$ )

Gel 4 / 5

- + - + - + - +  
IL-1 $\beta$  IL-1 $\beta$

Thr17  
-PLB

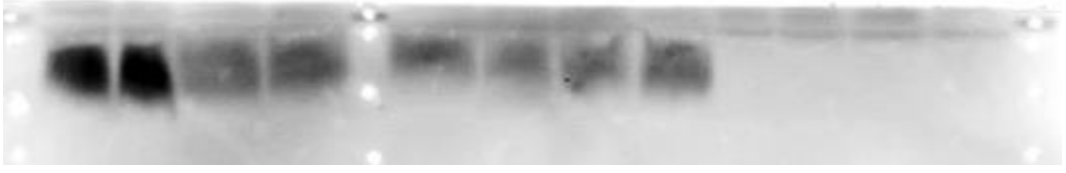

GAPDH

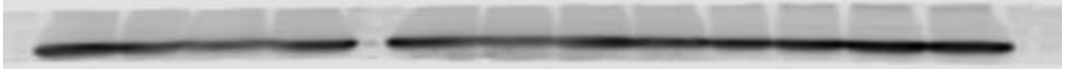

Gel 5 / 5

IL-1 $\beta$  IL-1 $\beta$  IL-1 $\beta$  IL-1 $\beta$  IL-1 $\beta$  IL-1 $\beta$

Thr17  
-PLB

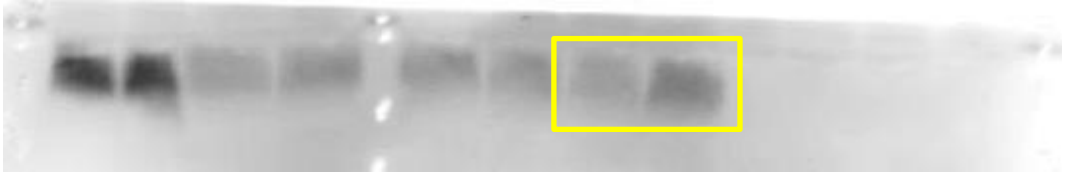

GAPDH

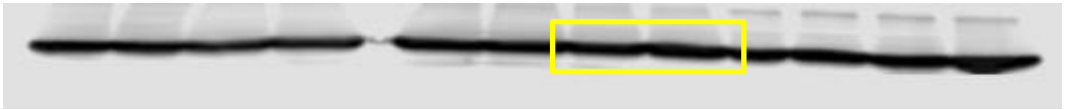

Figure 8B – HL1 cells

Excluded from this analysis

# Thr17-PLB (KN-92 vs. KN-93)

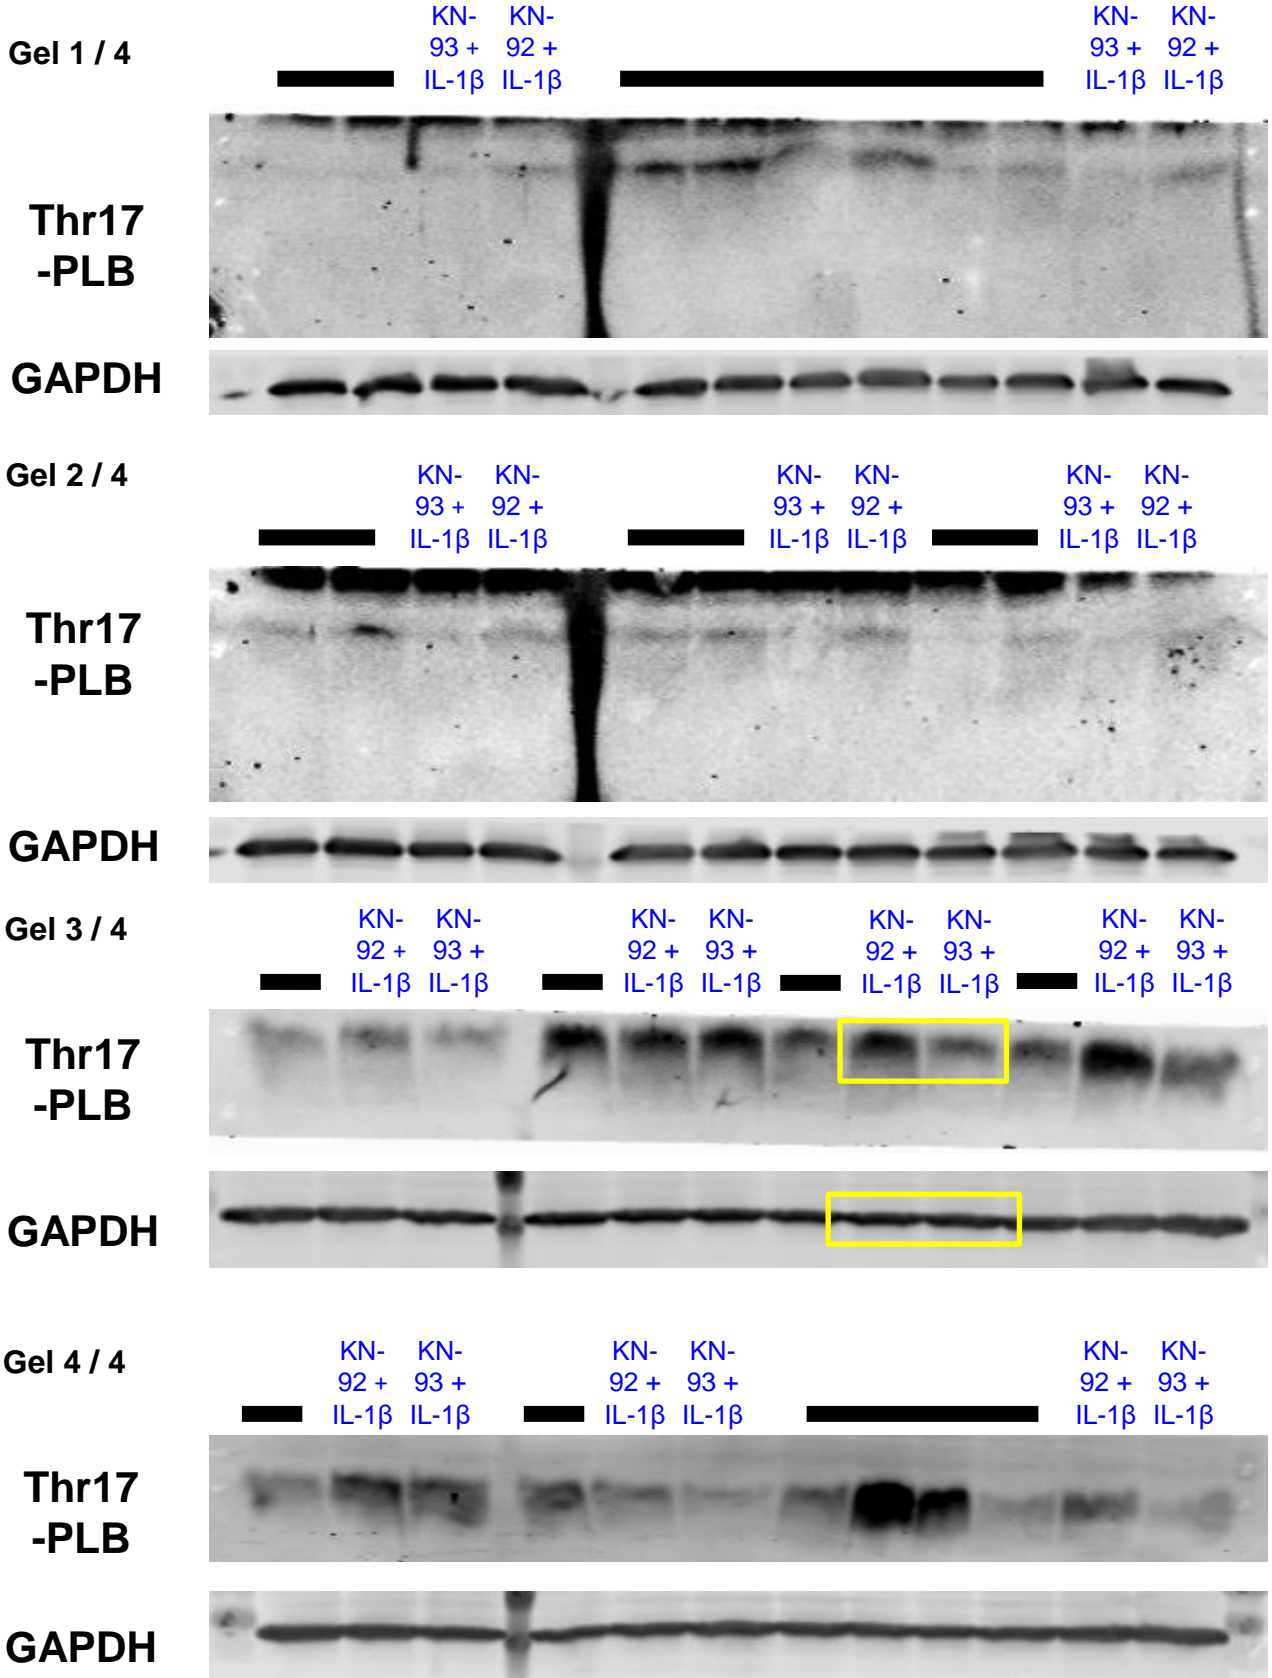

**Figure 8B – HL1 cells**

Excluded from this analysis

# NLRP3 (-IL-1 $\beta$ vs. + IL-1 $\beta$ )

Gel 1 / 5

IL-1 $\beta$  <sup>-</sup> IL-1 $\beta$  <sup>+</sup>  IL-1 $\beta$  <sup>-</sup> IL-1 $\beta$  <sup>+</sup>  IL-1 $\beta$  <sup>-</sup> IL-1 $\beta$  <sup>+</sup> 

NLRP3

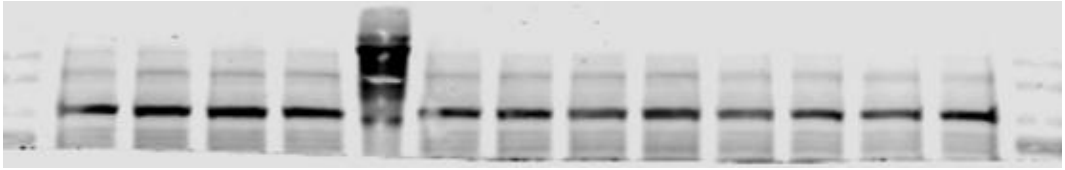

GAPDH

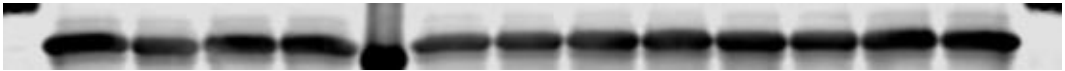

Gel 2 / 5

IL-1 $\beta$  <sup>-</sup> IL-1 $\beta$  <sup>+</sup>  IL-1 $\beta$  <sup>-</sup> IL-1 $\beta$  <sup>+</sup>  IL-1 $\beta$  <sup>-</sup> IL-1 $\beta$  <sup>+</sup> 

NLRP3

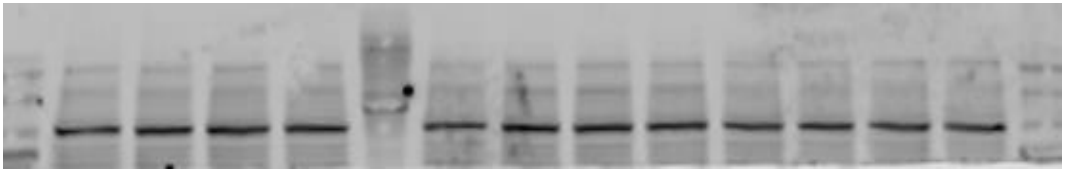

GAPDH

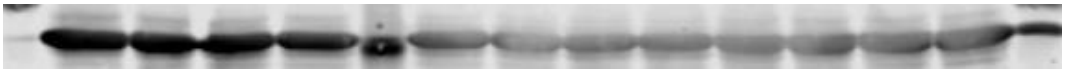

Gel 3 / 5

IL-1 $\beta$  <sup>-</sup> IL-1 $\beta$  <sup>+</sup>  IL-1 $\beta$  <sup>-</sup> IL-1 $\beta$  <sup>+</sup>  IL-1 $\beta$  <sup>-</sup> IL-1 $\beta$  <sup>+</sup> 

NLRP3

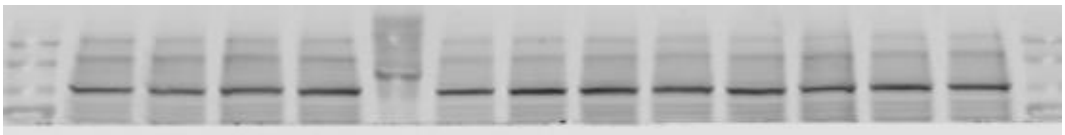

GAPDH

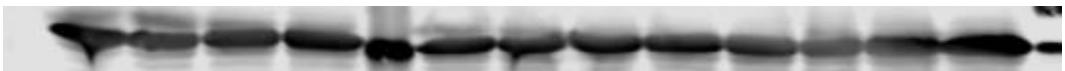

Figure 8E – HL1 cells

 Excluded from this analysis



# NLRP3 (-IL-1 $\beta$ vs. + IL-1 $\beta$ )

Gel 4 / 5

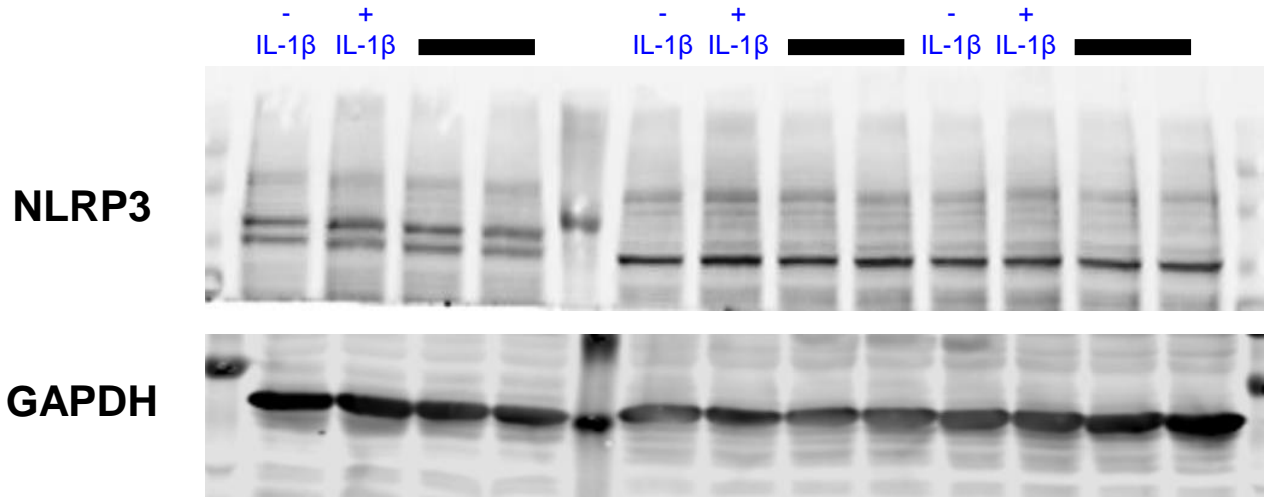

Gel 5 / 5

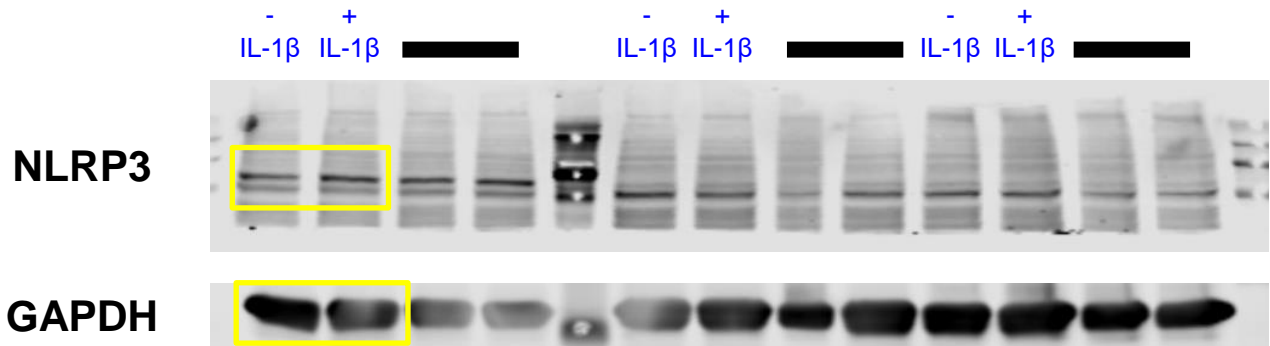

Figure 8E – HL1 cells

Excluded from this analysis

# Pro-Caspase-1 & Caspase-1-p20 (-IL-1 $\beta$ vs. + IL-1 $\beta$ )

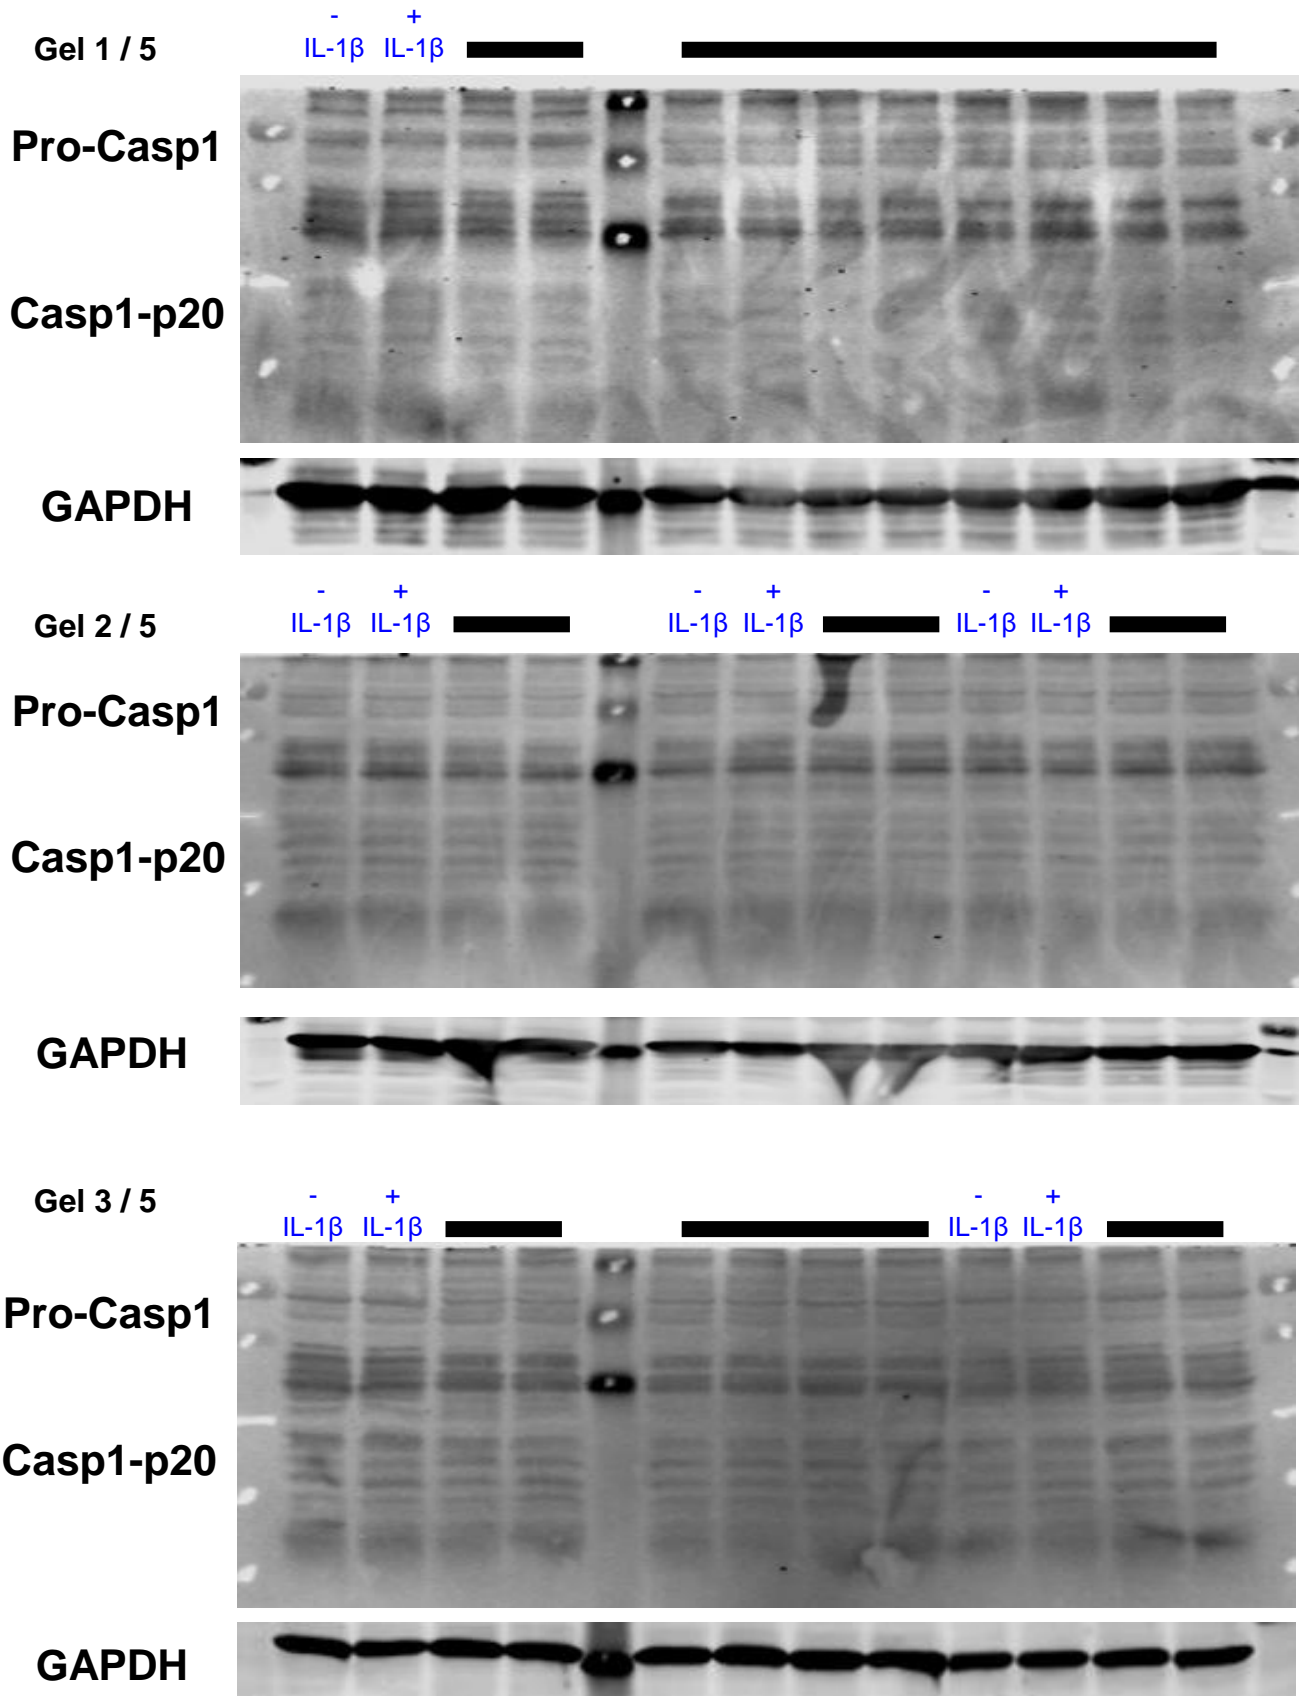

**Figure 8E – HL1 cells**

■ Excluded from this analysis

# Pro-Caspase-1 & Caspase-1-p20 (-IL-1 $\beta$ vs. + IL-1 $\beta$ )

Gel 4 / 5

- +      - +      - +  
IL-1 $\beta$  IL-1 $\beta$       IL-1 $\beta$  IL-1 $\beta$       IL-1 $\beta$  IL-1 $\beta$

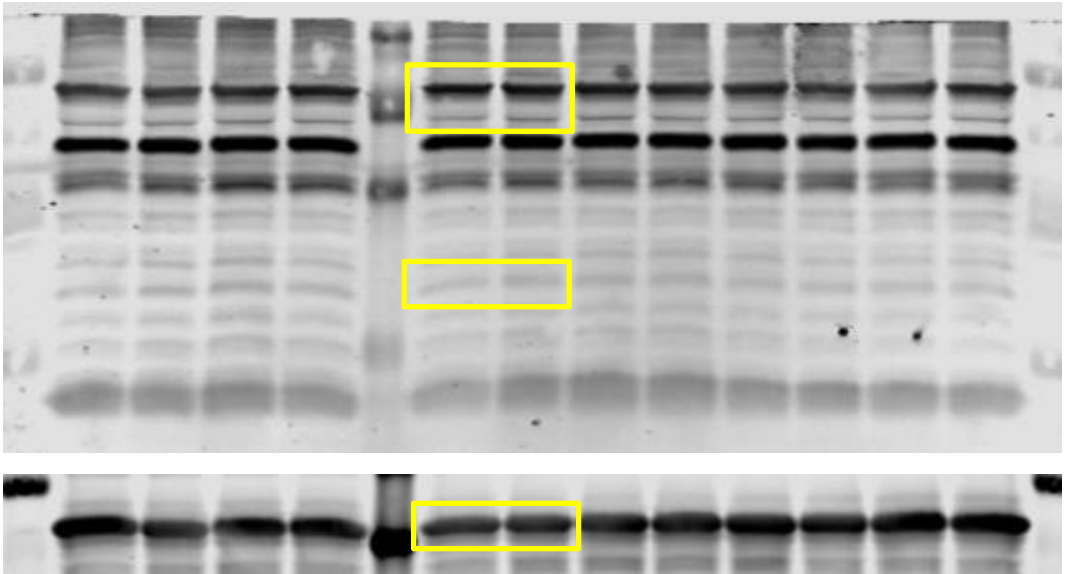

Gel 5 / 5

- +      - +      - +  
IL-1 $\beta$  IL-1 $\beta$       IL-1 $\beta$  IL-1 $\beta$       IL-1 $\beta$  IL-1 $\beta$

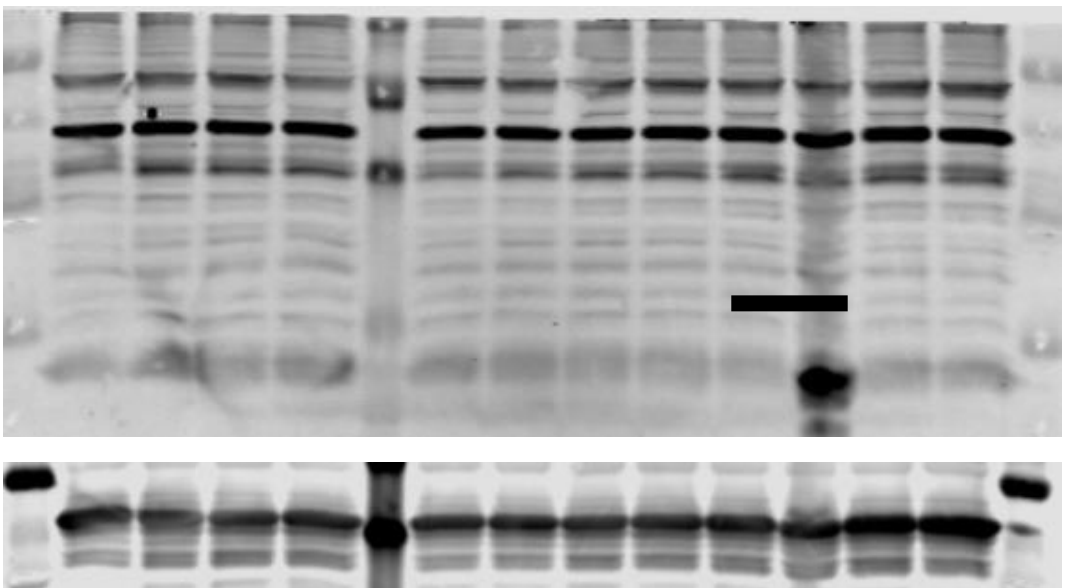

**Figure 8E – HL1 cells**

Excluded from this analysis

# Pro-Caspase-1 & Caspase-1-p20 (KN-92 vs. + KN-93)

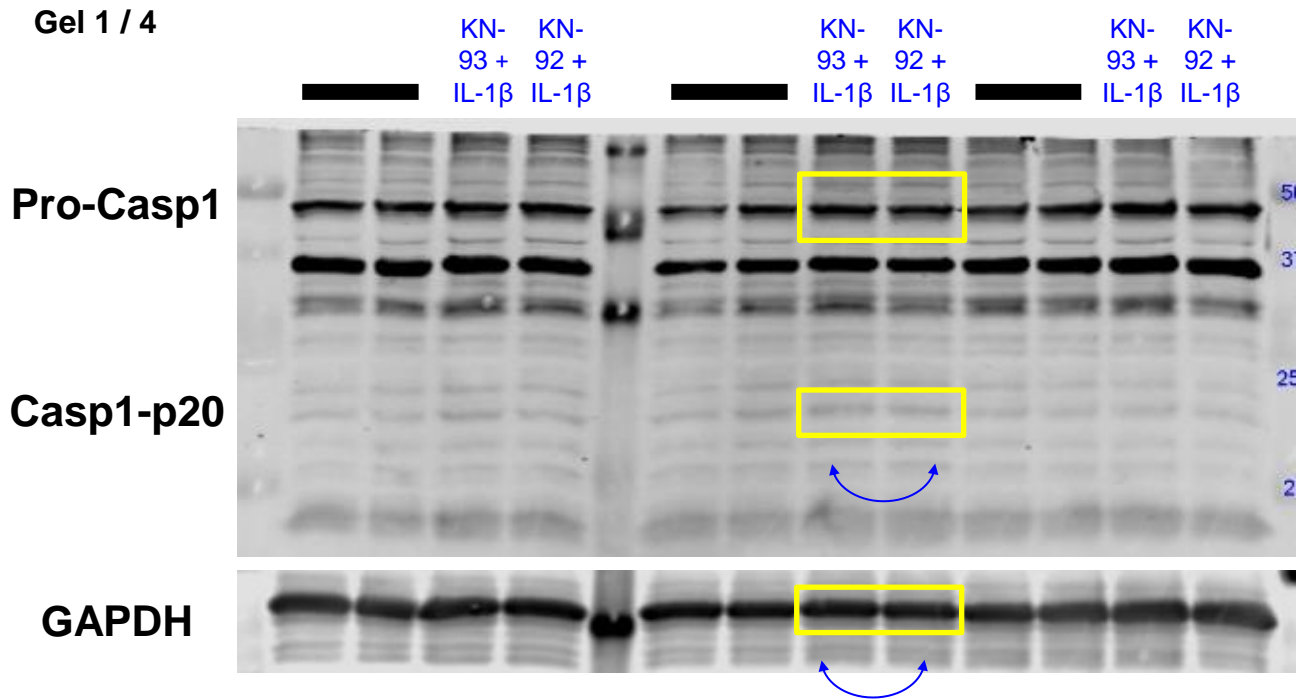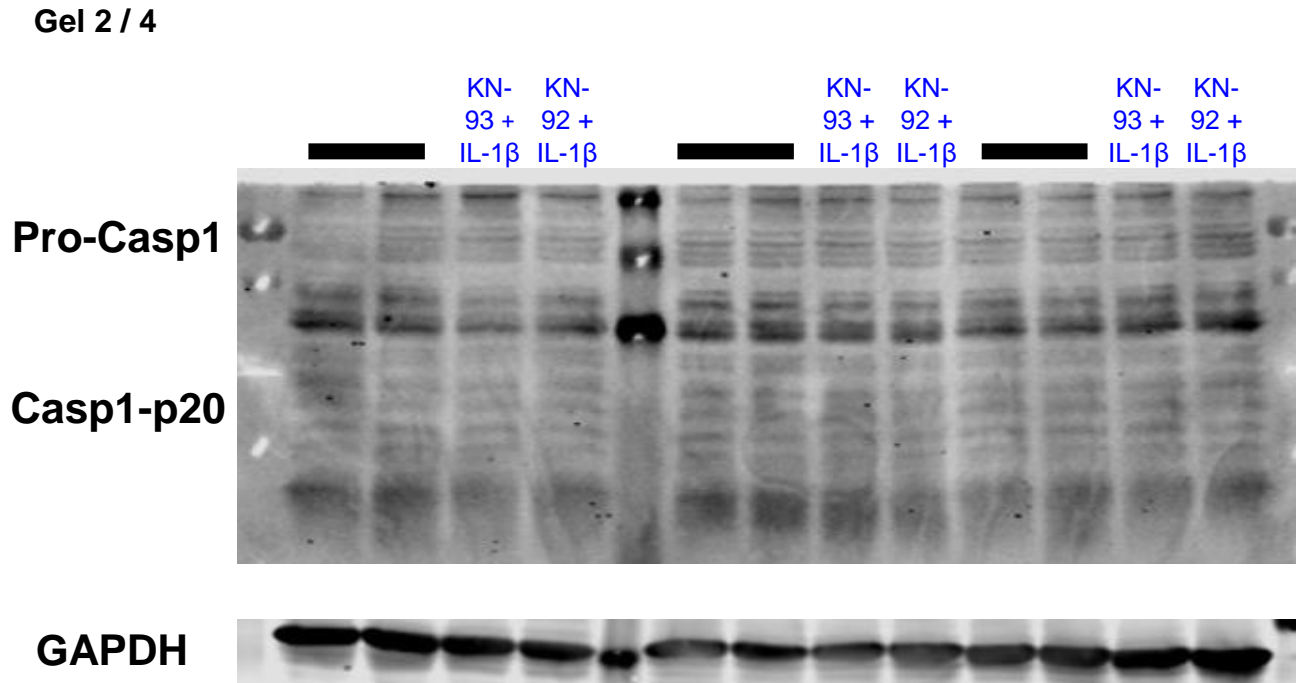

Figure 8E – HL1 cells

Excluded from this analysis

# Pro-Caspase-1 & Caspase-1-p20 (KN-92 vs. + KN-93)

Gel 3 / 4

KN- 93 +  
KN- 92 +  
IL-1 $\beta$  IL-1 $\beta$

Pro-Casp1

Casp1-p20

GAPDH

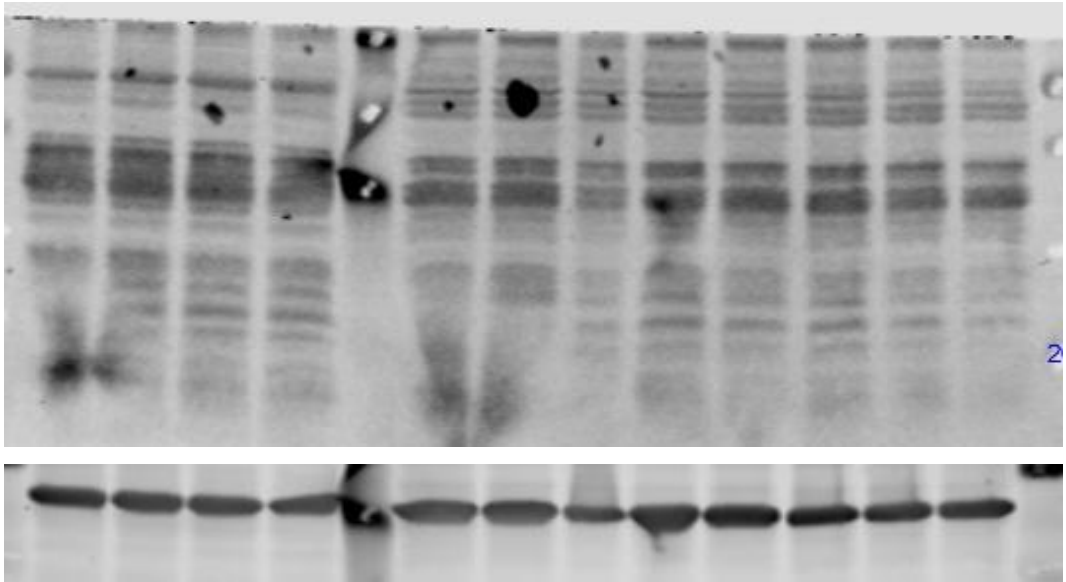

Gel 4 / 4

KN- 92 + IL-1 $\beta$     KN- 93 + IL-1 $\beta$     KN- 92 + IL-1 $\beta$     KN- 93 + IL-1 $\beta$     KN- 92 + IL-1 $\beta$     KN- 93 + IL-1 $\beta$

Pro-Casp1

Casp1-p20

GAPDH

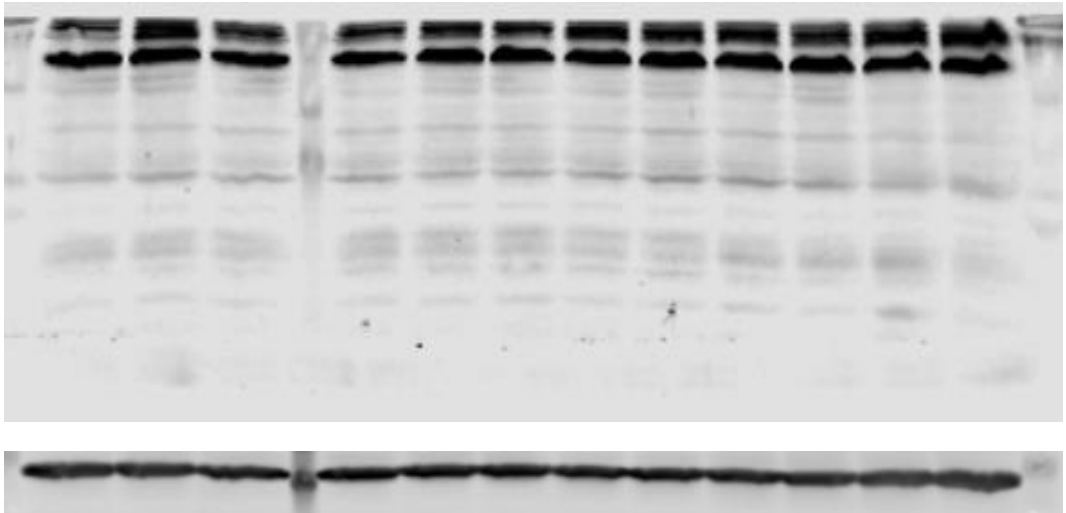

**Figure 8E – HL1 cells**

Excluded from this analysis

# Gasdermin-D (GSDMD) FL + NT (-IL-1 $\beta$ vs. + IL-1 $\beta$ )

Gel 1 / 4

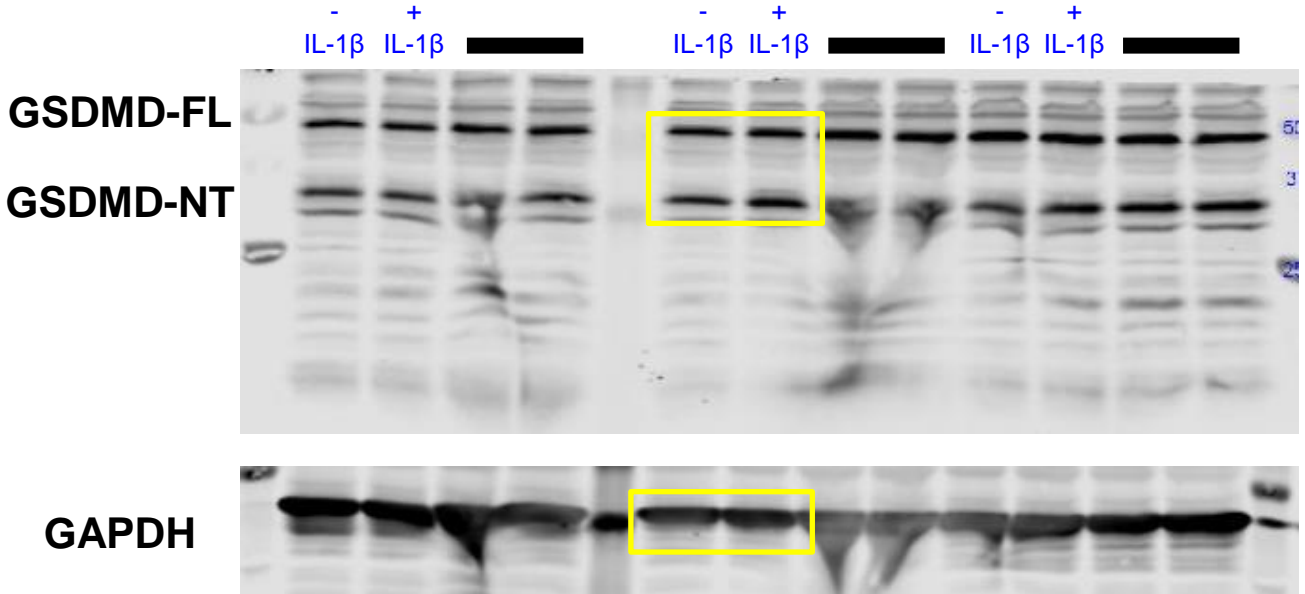

Gel 2 / 4

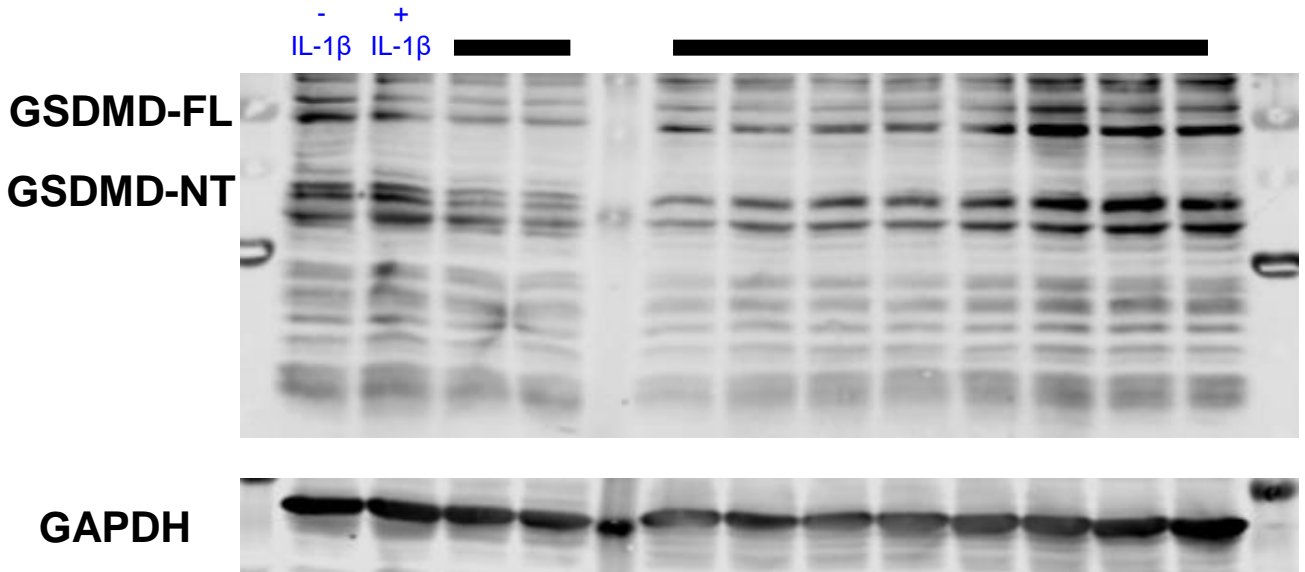

Figure 8E – HL1 cells

Excluded from this analysis

# Gasdermin-D (GSDMD) FL + NT (-IL-1 $\beta$ vs. + IL-1 $\beta$ )

Gel 3 / 4

- + - + - + - + - +  
IL-1 $\beta$  IL-1 $\beta$

GSDMD-FL

GSDMD-NT

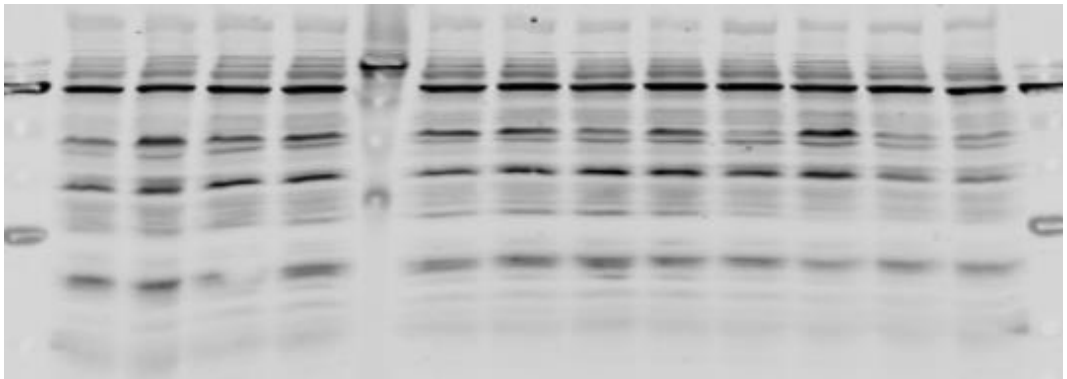

GAPDH

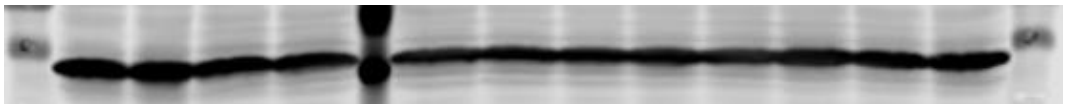

Gel 4 / 4

- + - + - + - + - +  
IL-1 $\beta$  IL-1 $\beta$

GSDMD-FL

GSDMD-NT

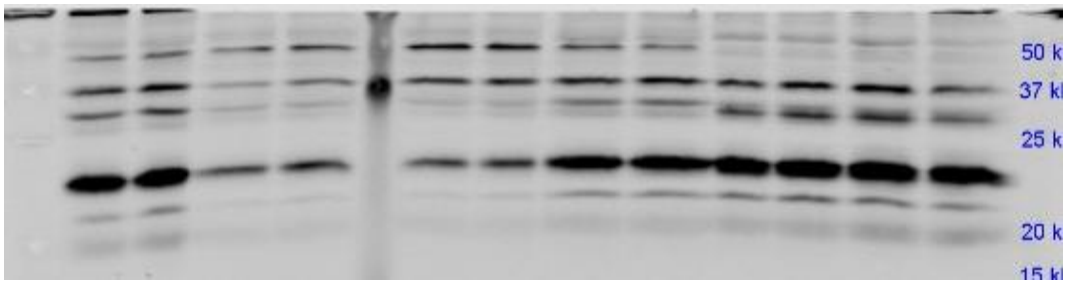

GAPDH

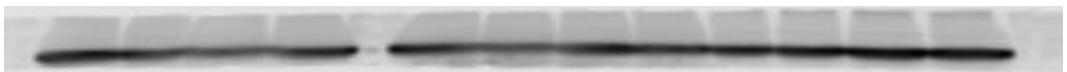

Figure 8E – HL1 cells

Excluded from this analysis

# Gasdermin-D (GSDMD) FL + NT (KN-92 vs. KN-93)

Gel 1 / 5

KN- 93 +  
KN- 92 +  
IL-1 $\beta$  IL-1 $\beta$

KN- 93 +  
KN- 92 +  
IL-1 $\beta$  IL-1 $\beta$

KN- 93 +  
KN- 92 +  
IL-1 $\beta$  IL-1 $\beta$

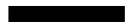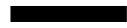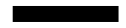

GSDMD-FL  
GSDMD-NT

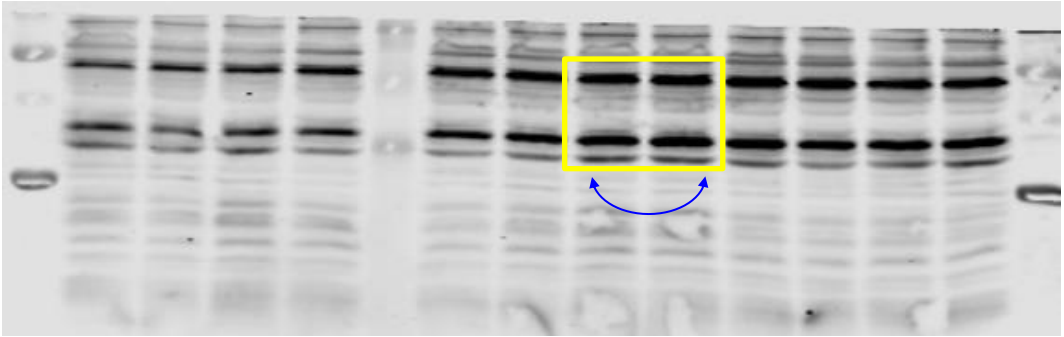

GAPDH

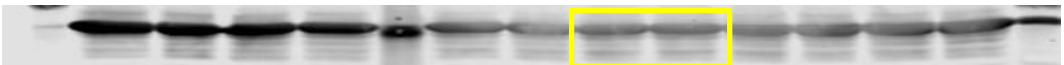

Gel 2 / 5

KN- 93 +  
KN- 92 +  
IL-1 $\beta$  IL-1 $\beta$

KN- 93 +  
KN- 92 +  
IL-1 $\beta$  IL-1 $\beta$

KN- 93 +  
KN- 92 +  
IL-1 $\beta$  IL-1 $\beta$

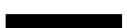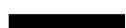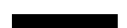

GSDMD-FL  
GSDMD-NT

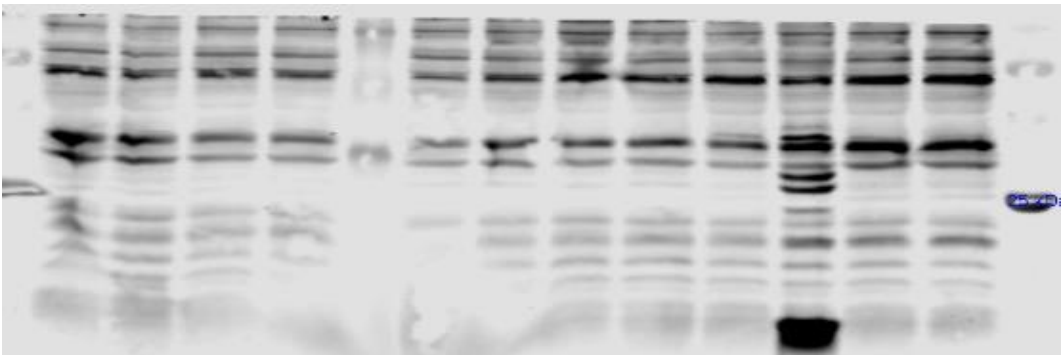

GAPDH

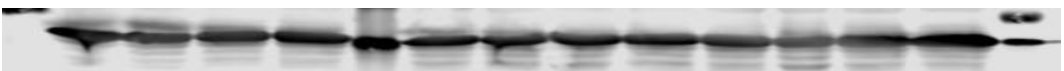

Gel 3 / 5

KN- 93 +  
KN- 92 +  
IL-1 $\beta$  IL-1 $\beta$

KN- 93 +  
KN- 92 +  
IL-1 $\beta$  IL-1 $\beta$

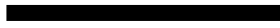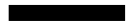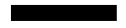

GSDMD-FL  
GSDMD-NT

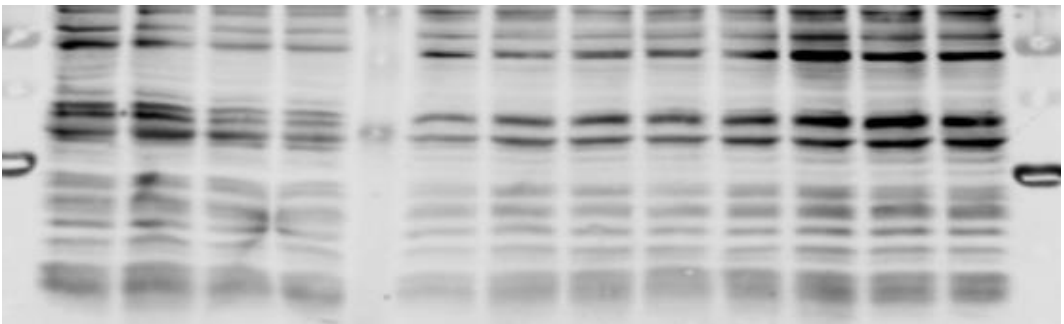

GAPDH

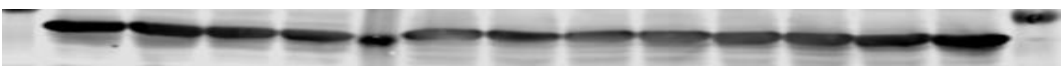

Figure 8E – HL1 cells

 Excluded from this analysis



# Gasdermin-D (GSDMD) FL + NT (KN-92 vs. KN-93)

Gel 4 / 5

■ KN-92 + IL-1 $\beta$  KN-93 + IL-1 $\beta$  ■ KN-92 + IL-1 $\beta$  KN-93 + IL-1 $\beta$  ■

GSDMD-FL  
GSDMD-NT

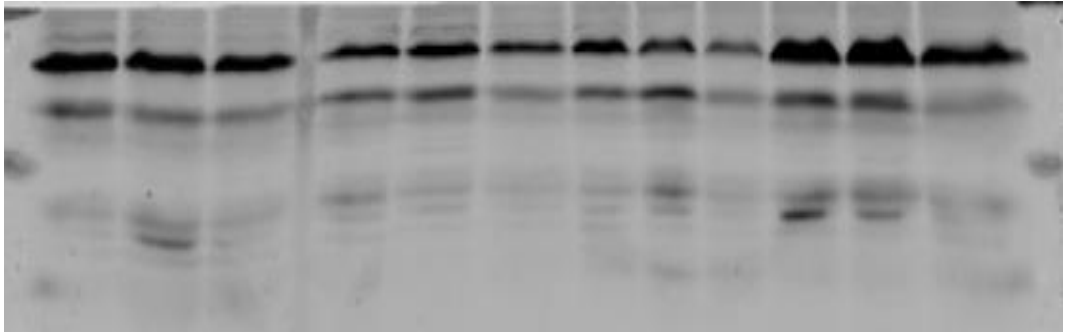

GAPDH

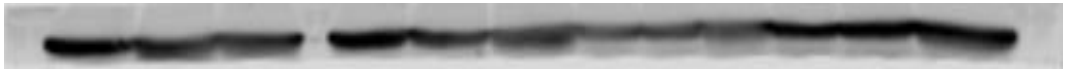

Gel 5 / 5

■ KN-92 + IL-1 $\beta$  KN-93 + IL-1 $\beta$  ■ KN-92 + IL-1 $\beta$  KN-93 + IL-1 $\beta$  ■ KN-92 + IL-1 $\beta$  KN-93 + IL-1 $\beta$  ■

GSDMD-FL  
GSDMD-NT

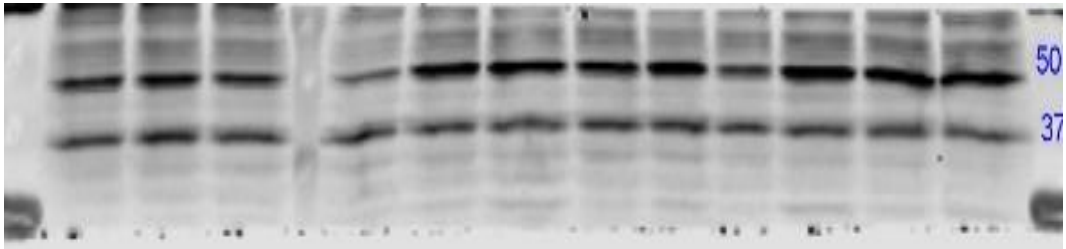

GAPDH

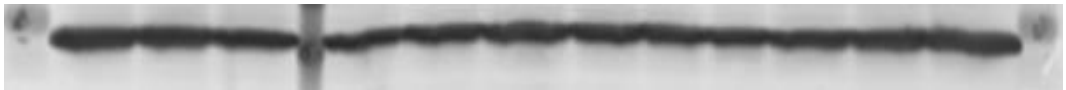

Figure 8E – HL1 cells

■ Excluded from this analysis

Gel 1 / 4

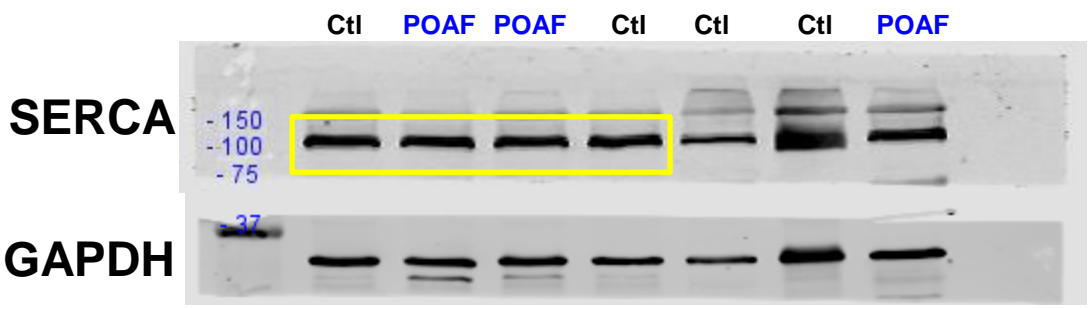

Gel 2 / 4

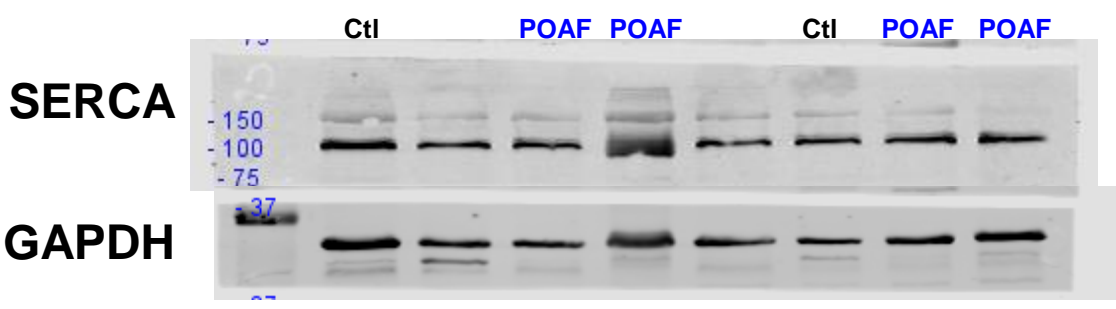

Gel 3 / 4

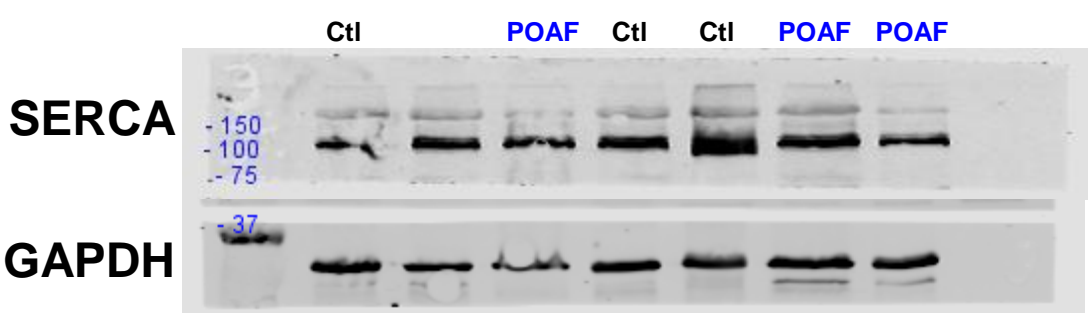

Gel 4 / 4

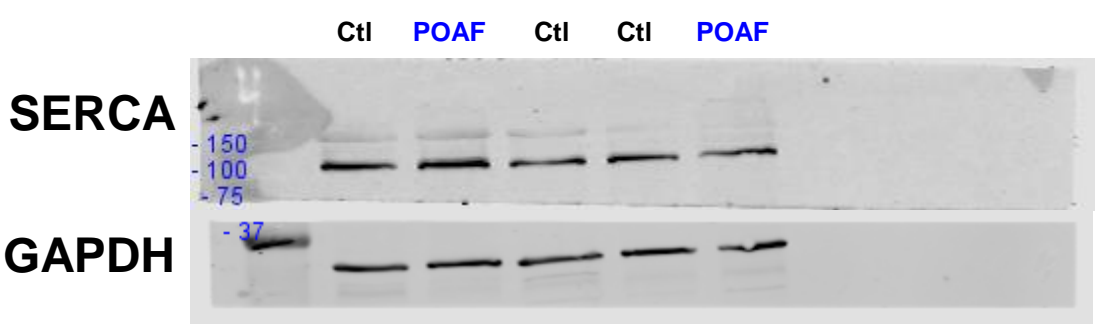

Online Figure VIIA

Gel 1 / 4

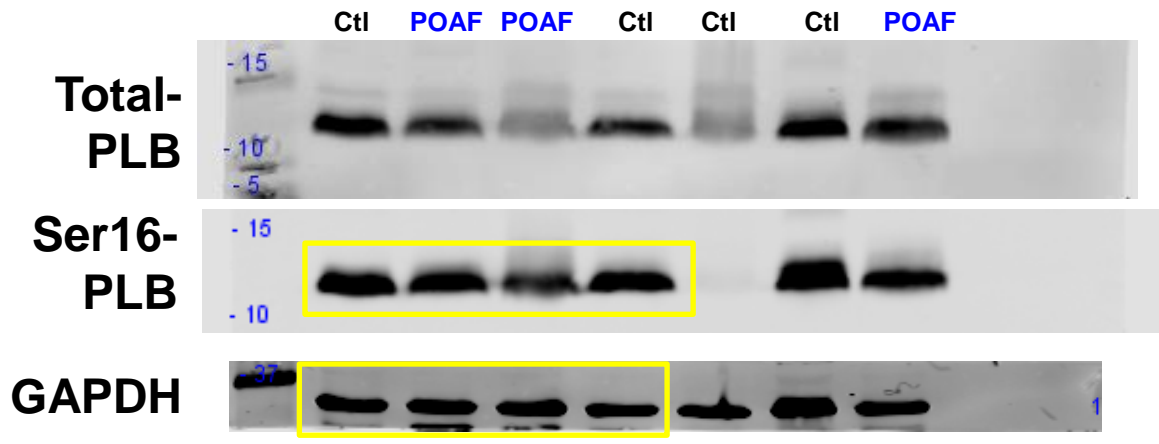

Gel 2 / 4

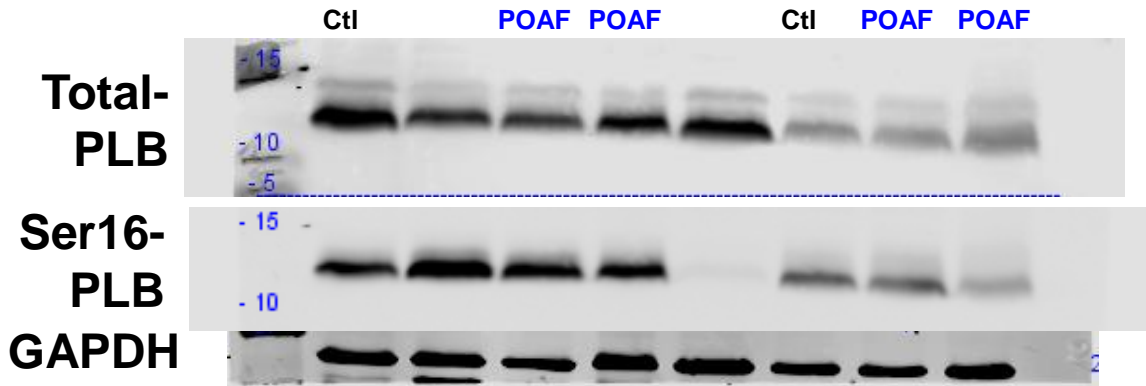

Gel 3 / 4

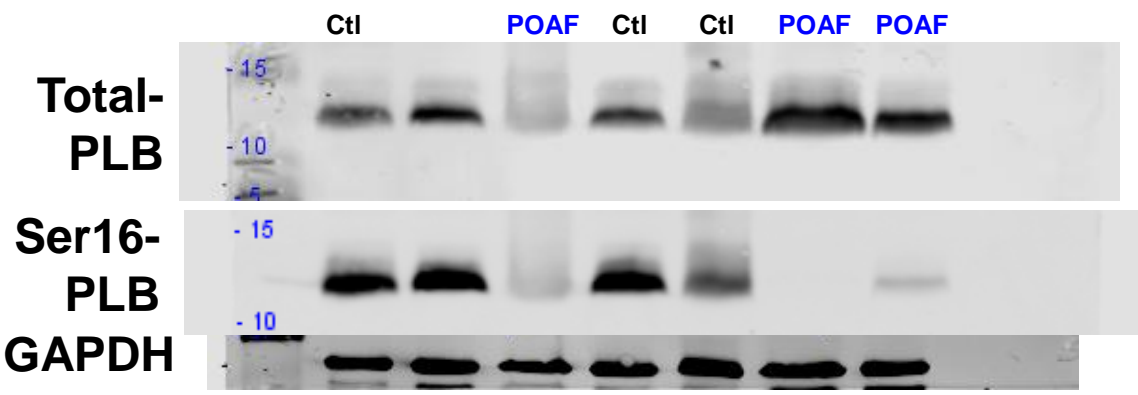

Gel 4 / 4

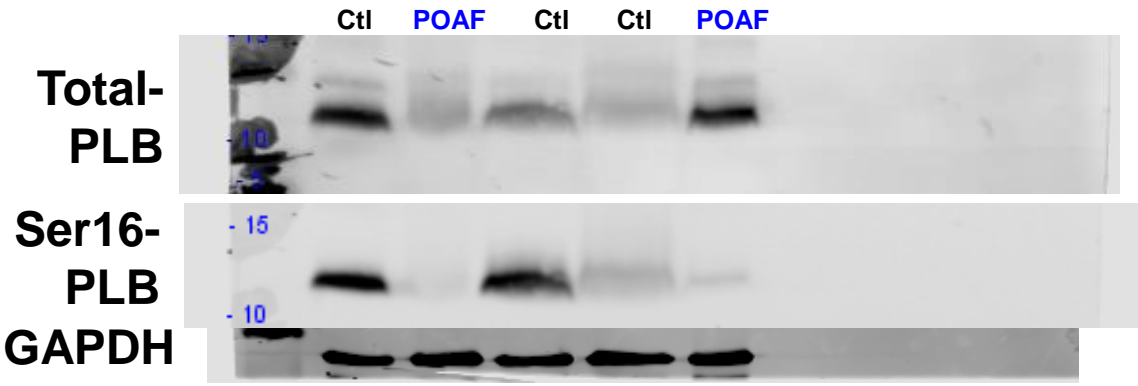

Online Figure VIIA

Gel 1 / 4

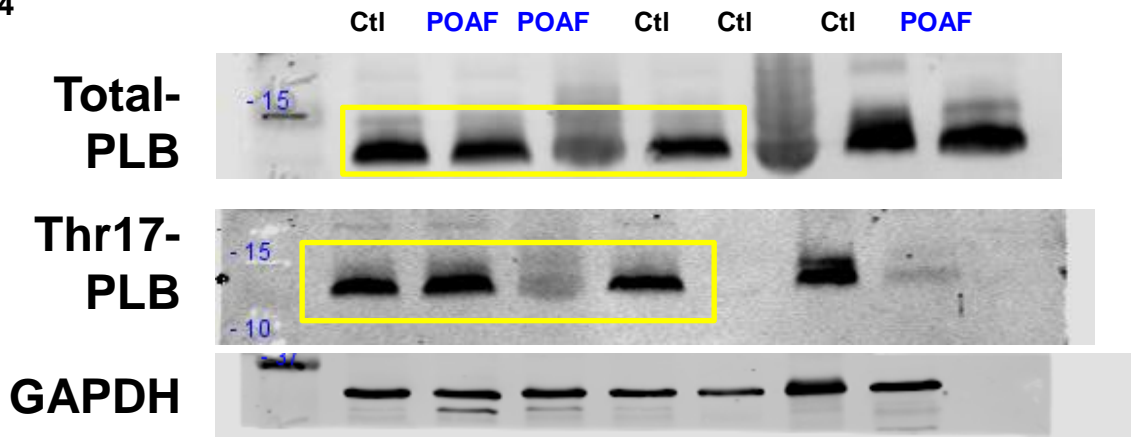

Gel 2 / 4

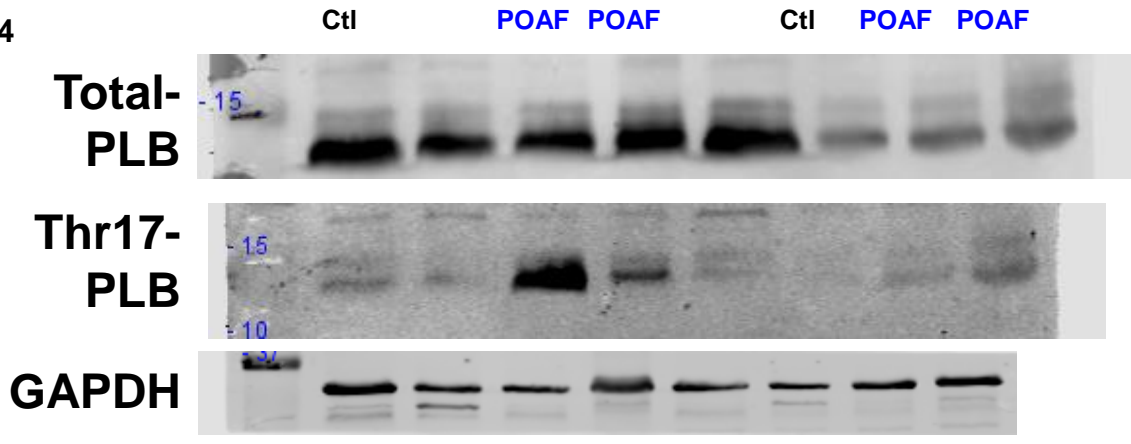

Gel 3 / 4

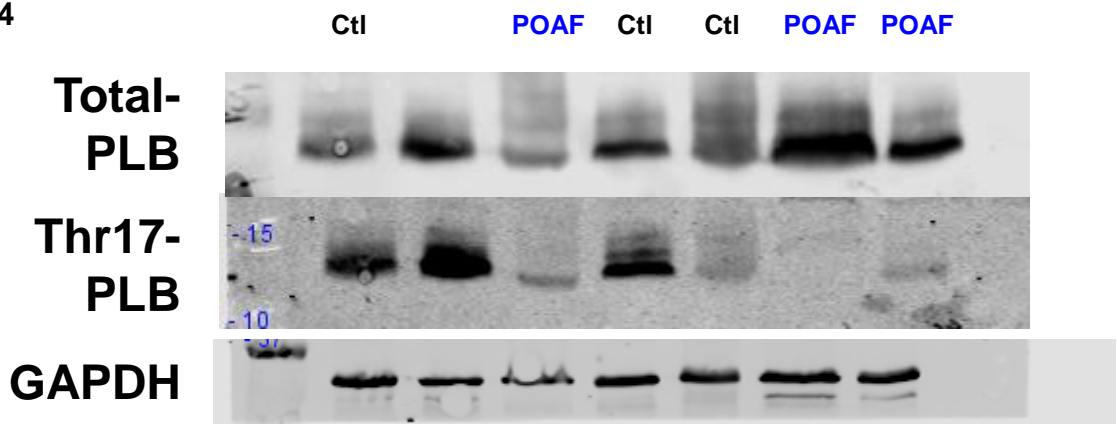

Gel 4 / 4

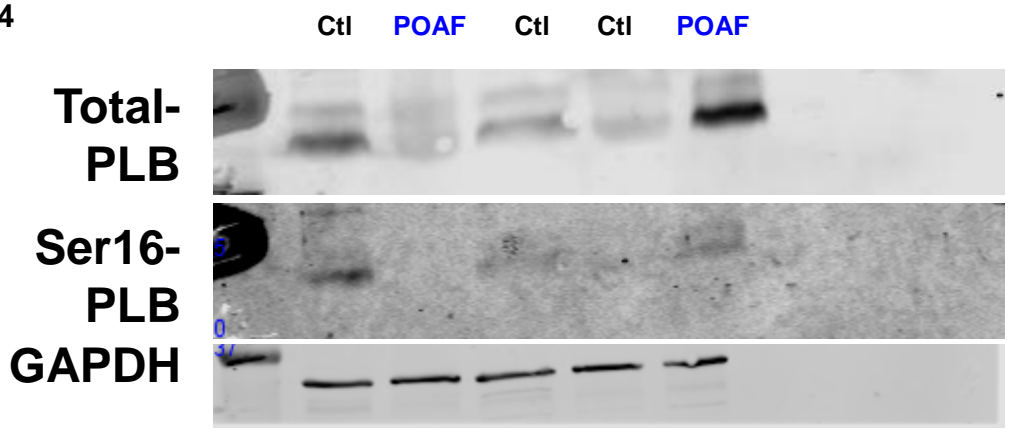

Online Figure VIIA

**Gel 1 / 3**

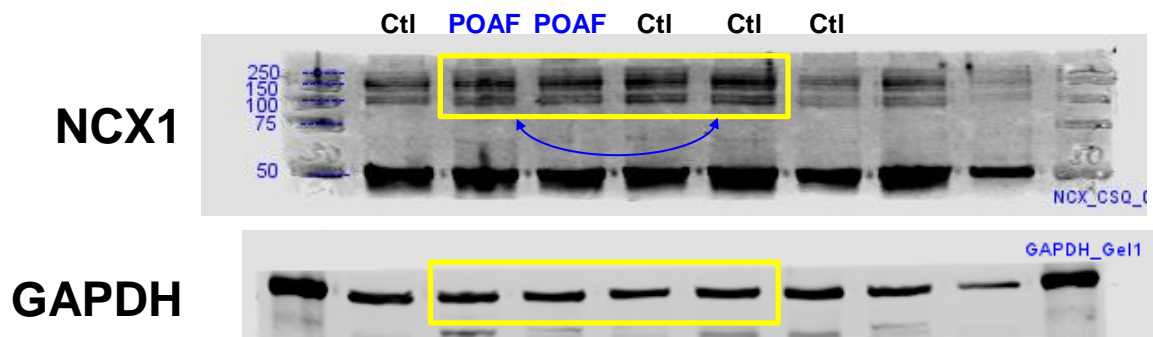

**Gel 2 / 3**

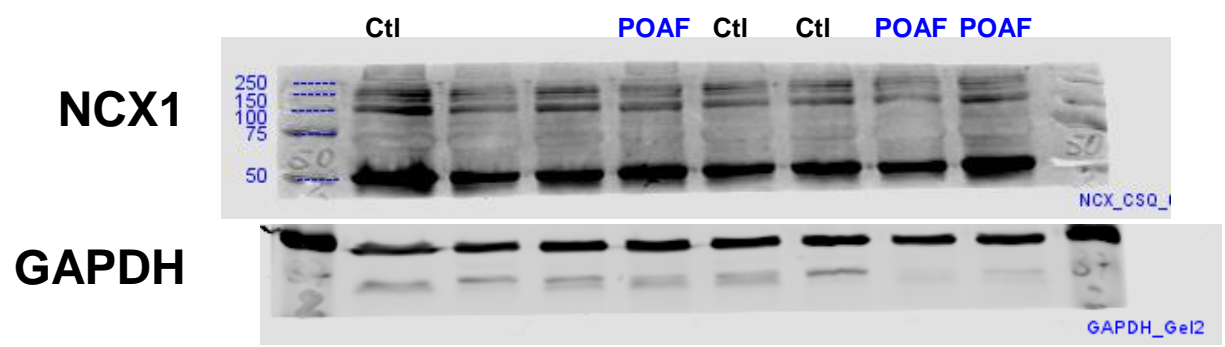

**Gel 3 / 3**

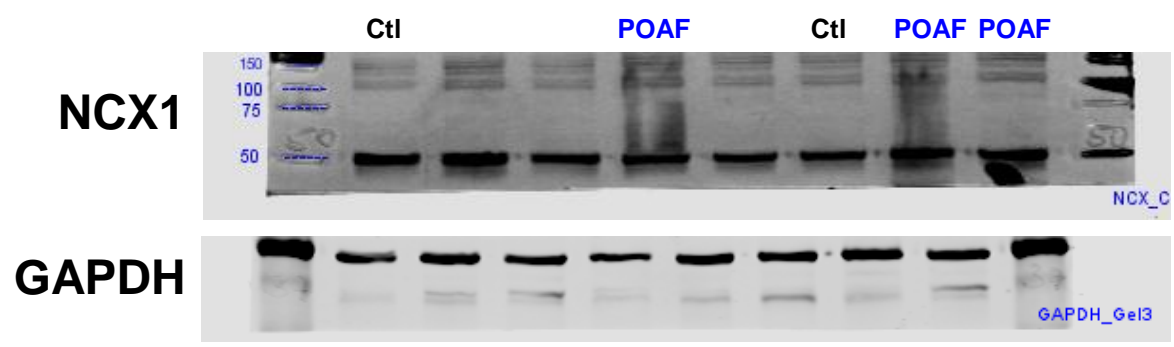

Gel 1 / 3

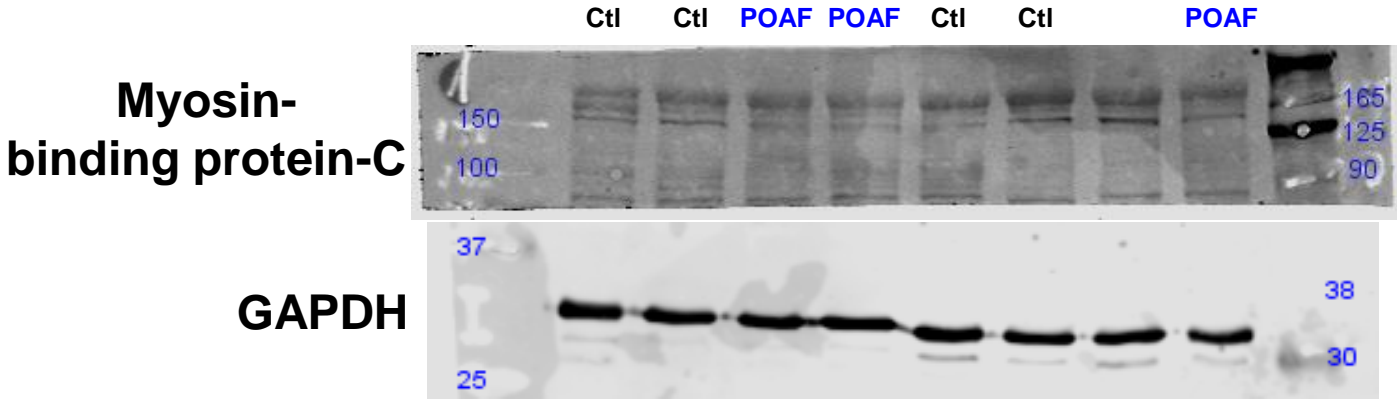

Gel 2 / 3

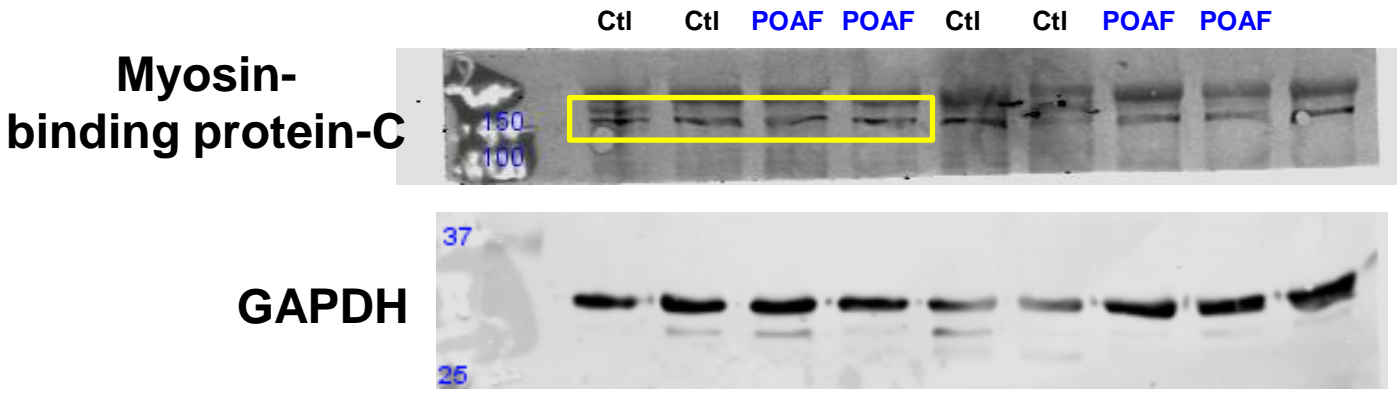

Gel 3 / 3

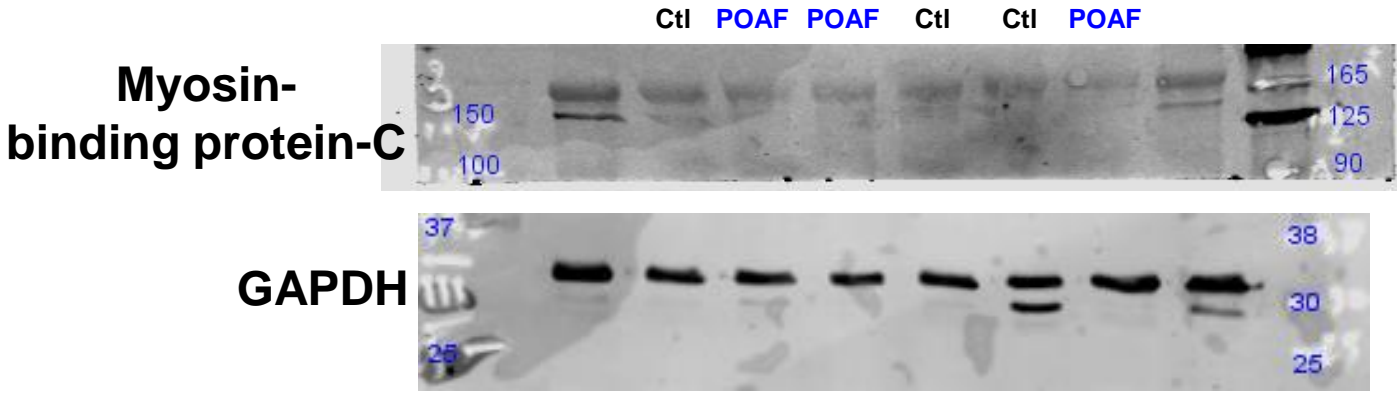

Online Figure VIID – Human atrial whole-tissue lysates

**Gel 1 / 2**

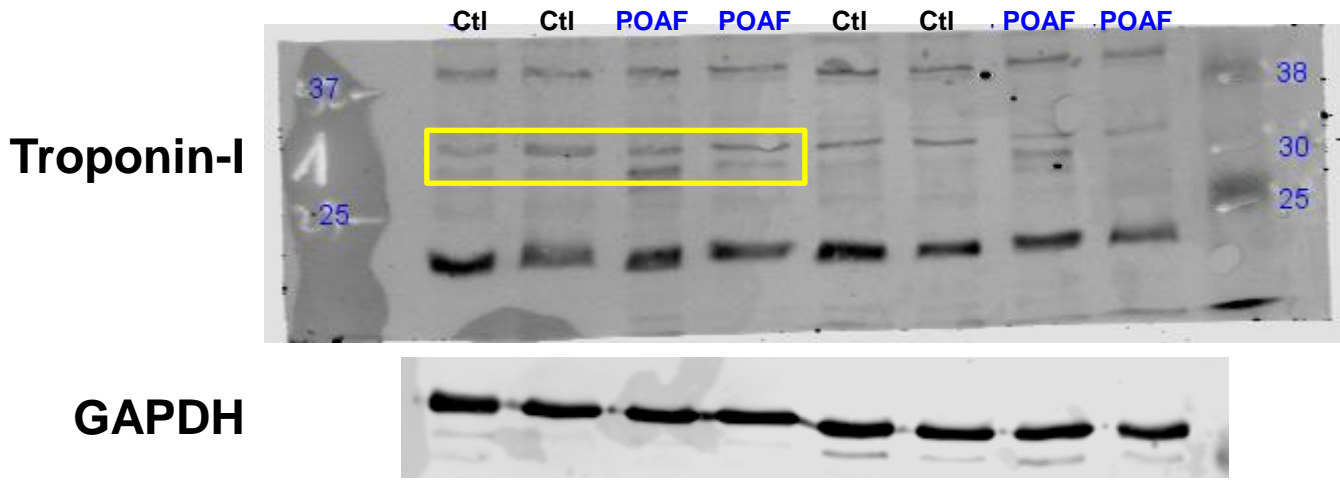

**Gel 2 / 2**

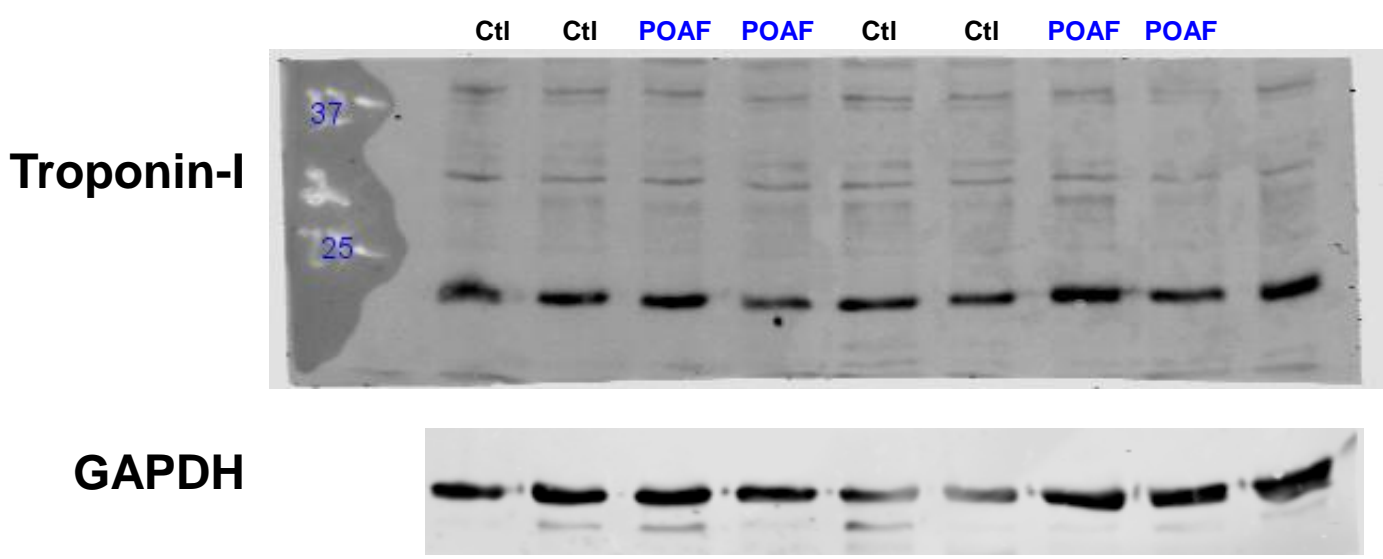

**Online Figure VIID – Human atrial whole-tissue lysates**

Gel 1 / 4

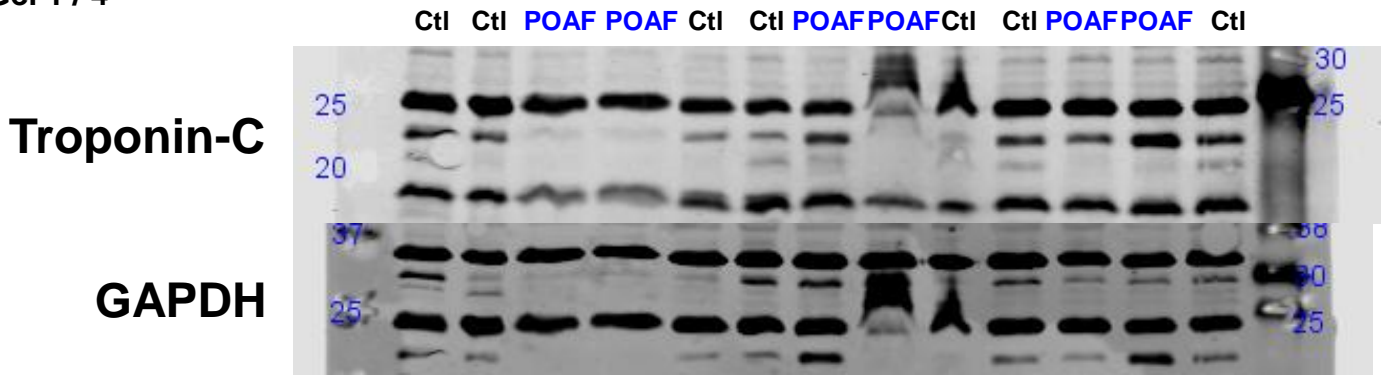

Gel 2 / 4

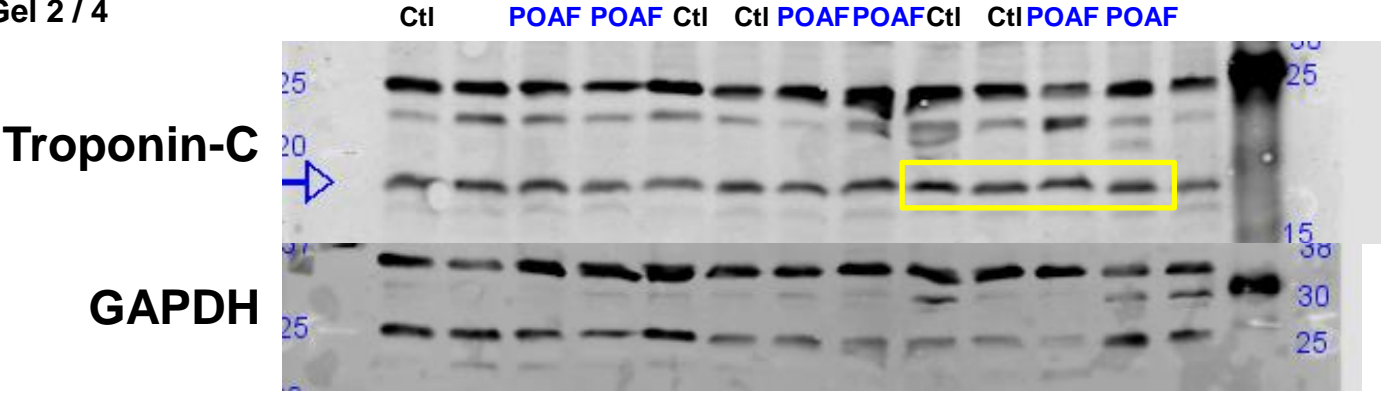

Gel 3 / 4

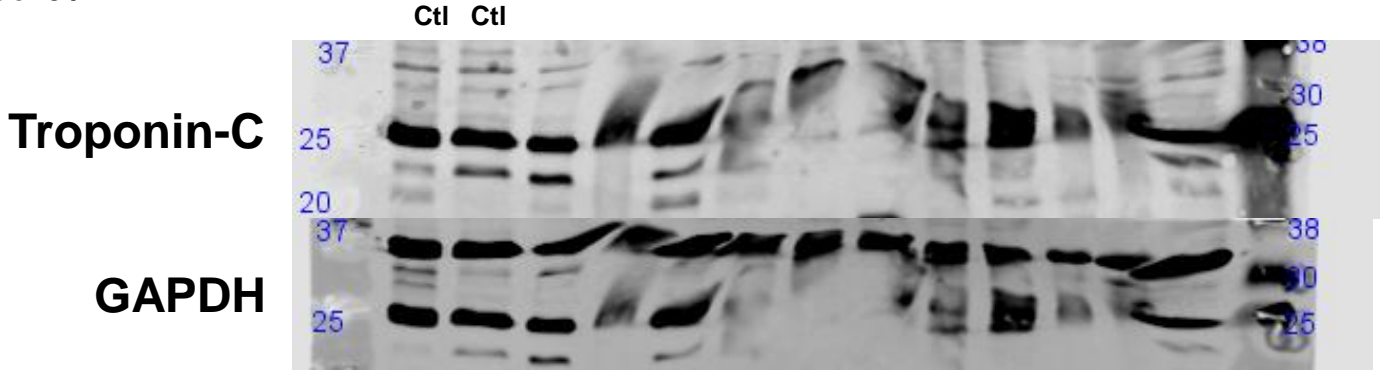

Gel 4 / 4

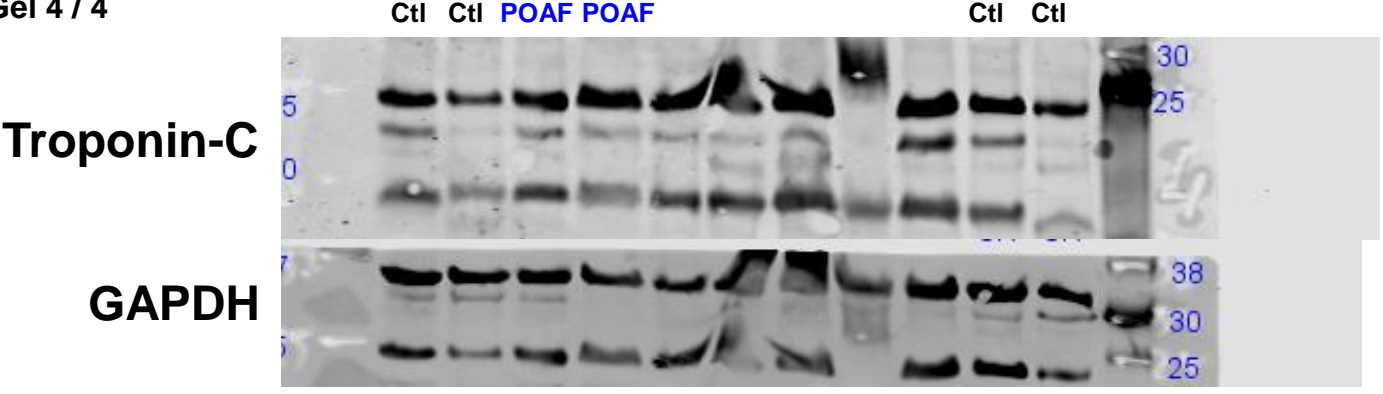

Online Figure VIID – Human atrial whole-tissue lysates



**Gel 1 / 3**

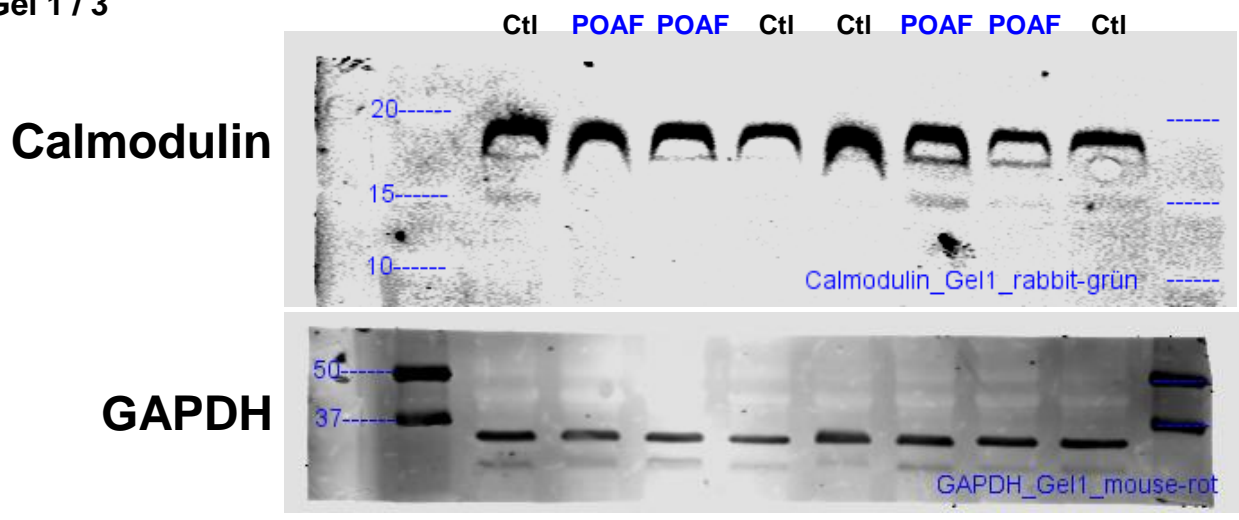

**Gel 2 / 3**

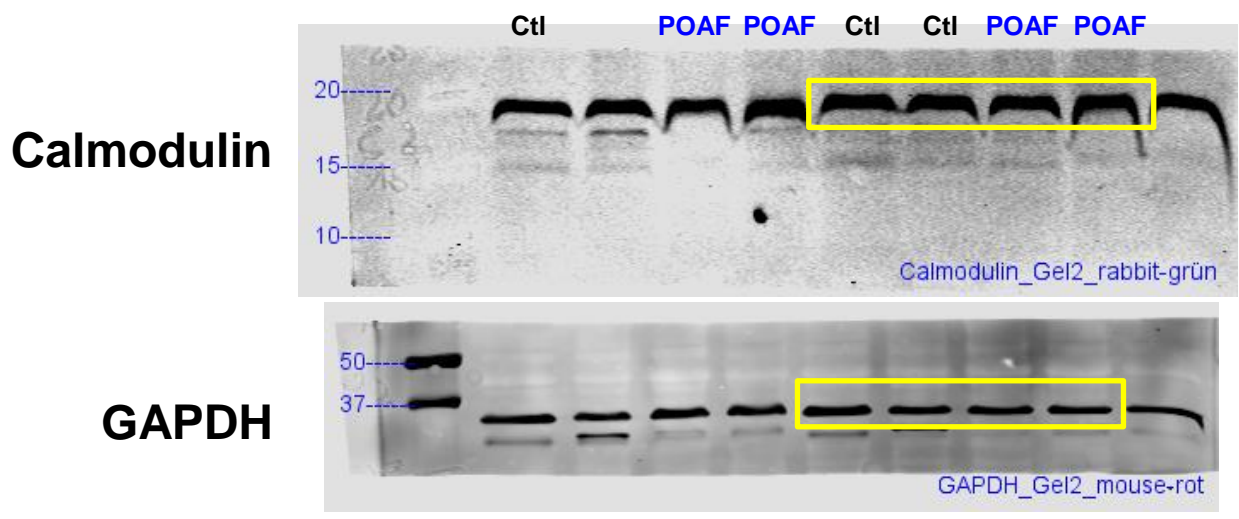

**Gel 3 / 3**

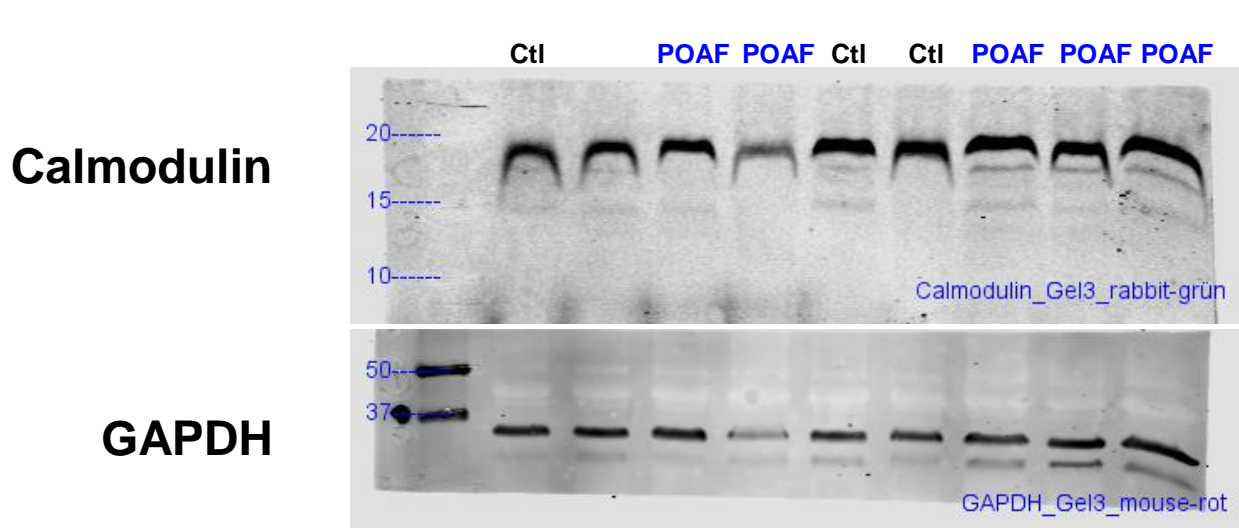

**Online Figure VIID – Human atrial whole-tissue lysates**

Gel 1 / 4

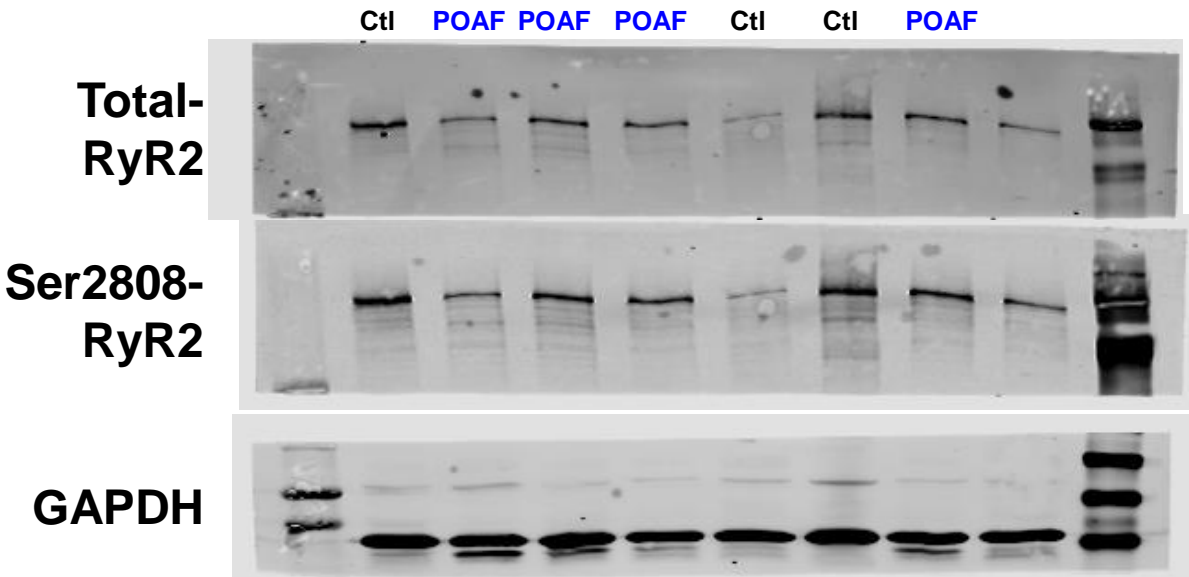

Gel 2 / 4

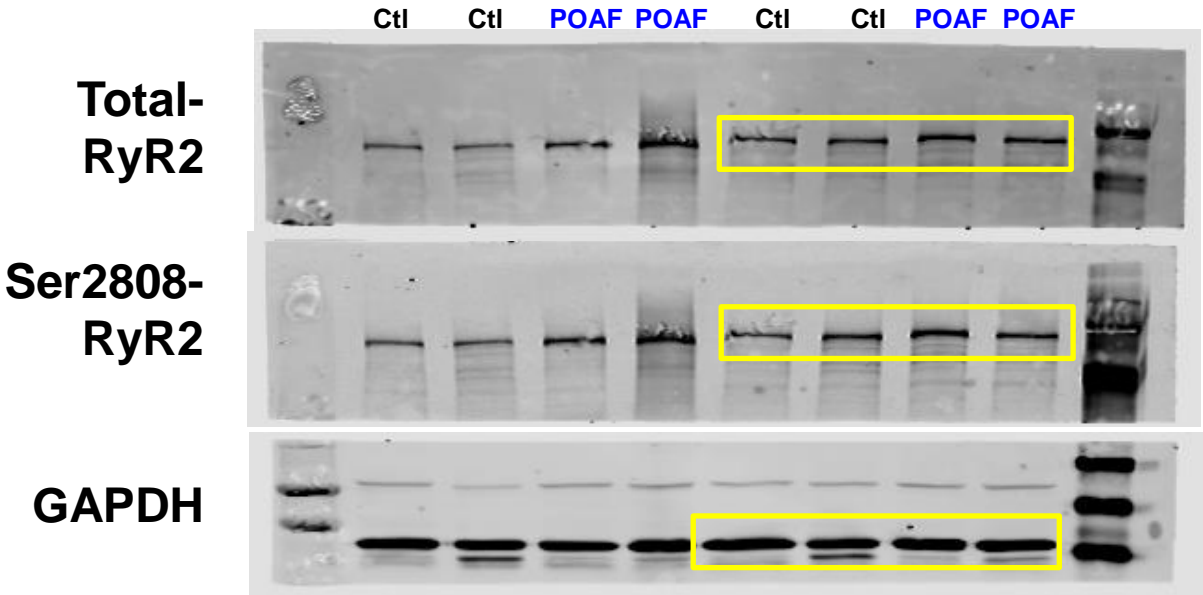

Online Figure IXA – Human atrial whole-tissue lysates

Gel 3 / 4

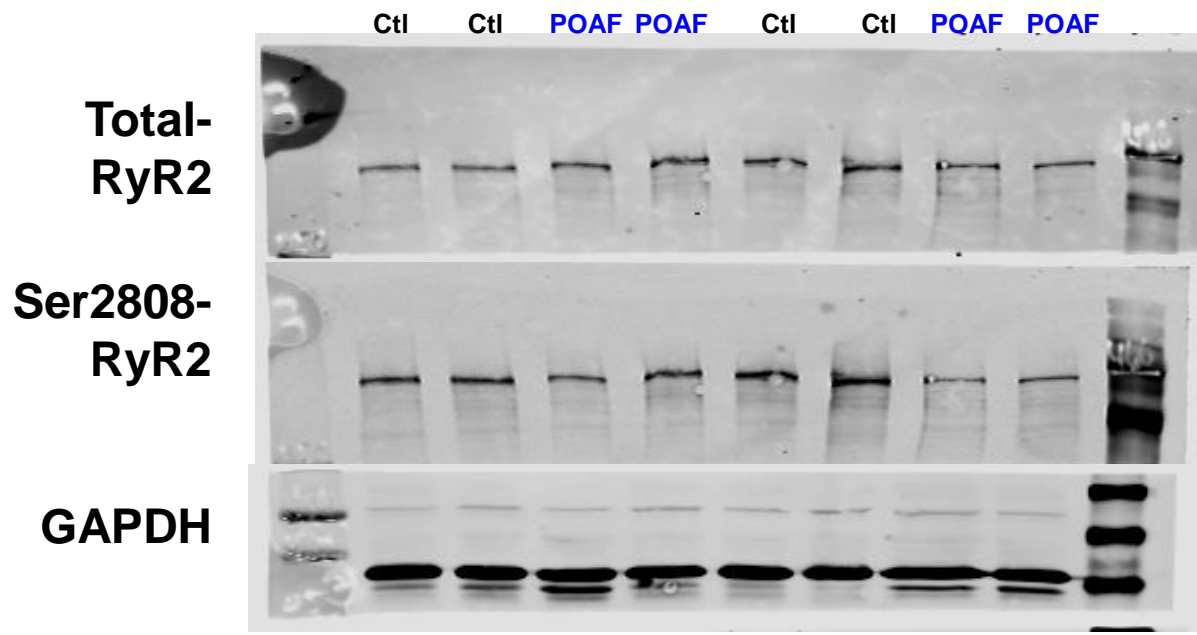

Gel 4 / 4

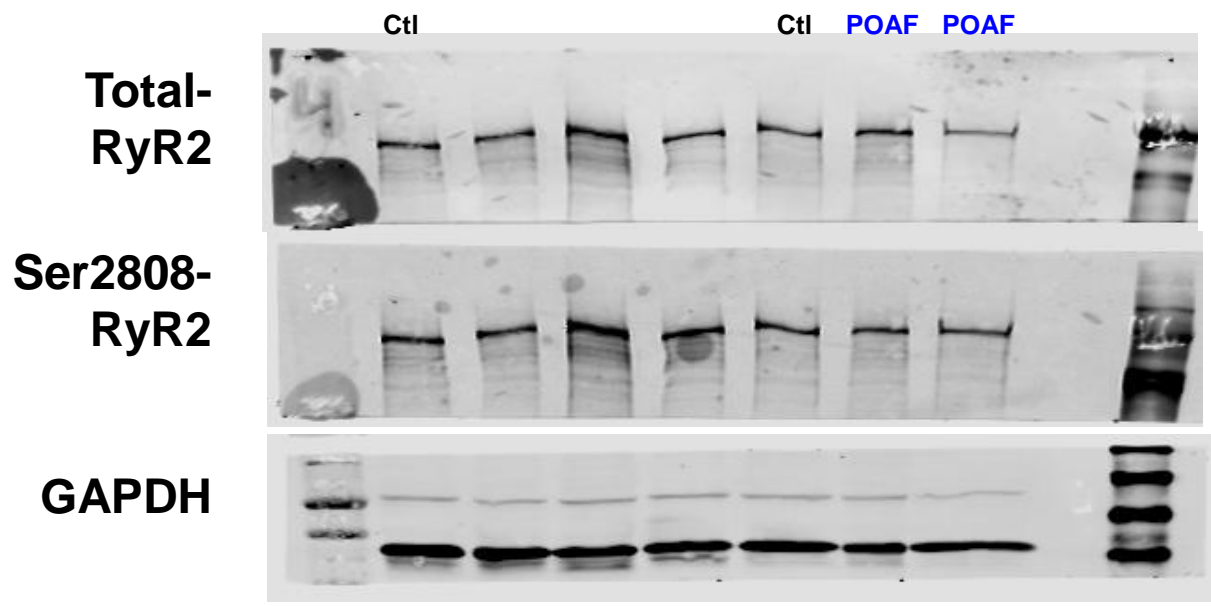

Online Figure IXA – Human atrial whole-tissue lysates

Gel 1 / 3

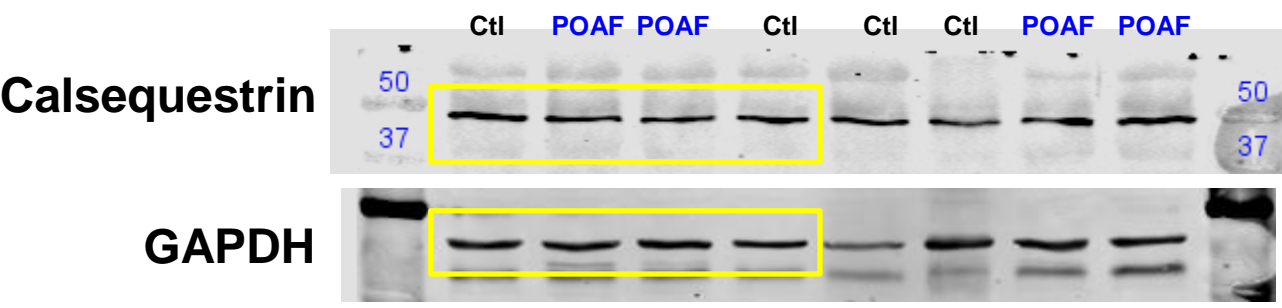

Gel 2 / 3

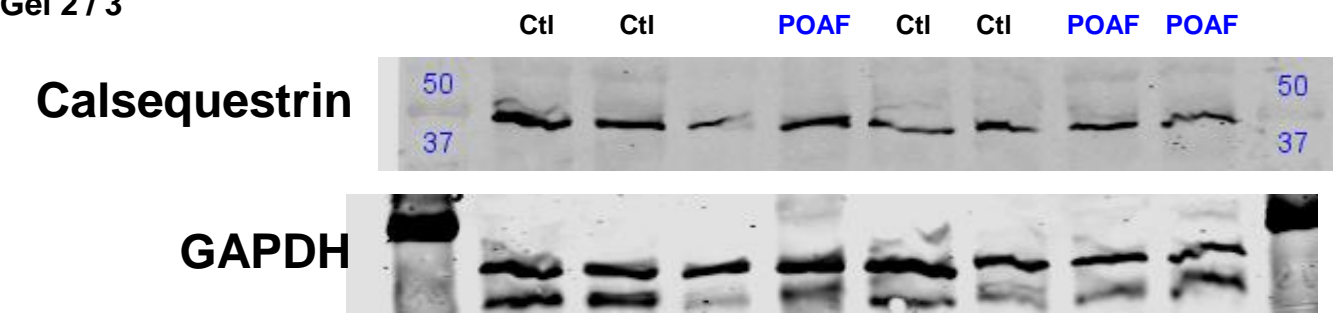

Gel 3 / 3

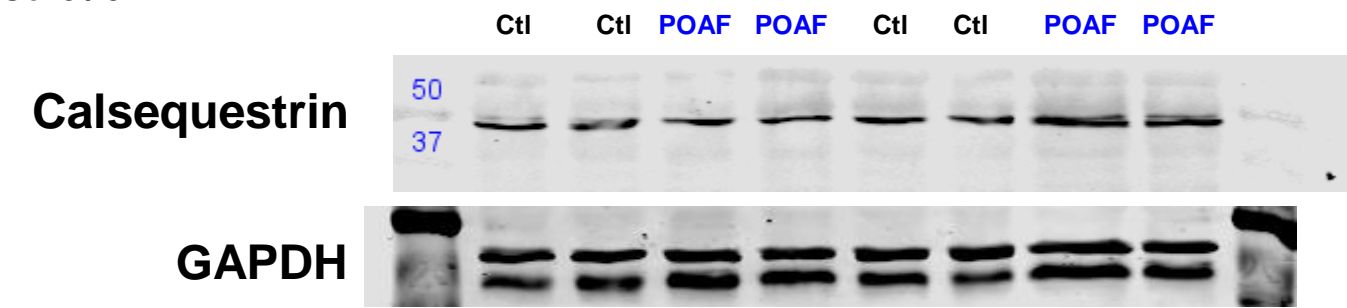

## NLRP3

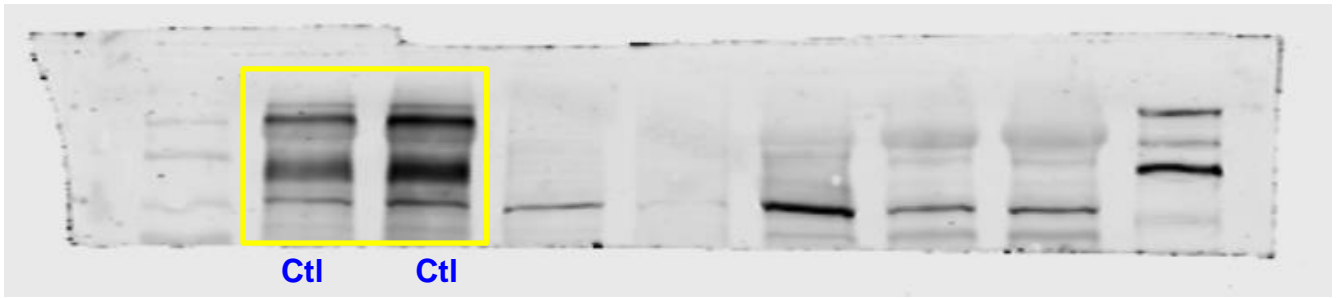

## GAPDH

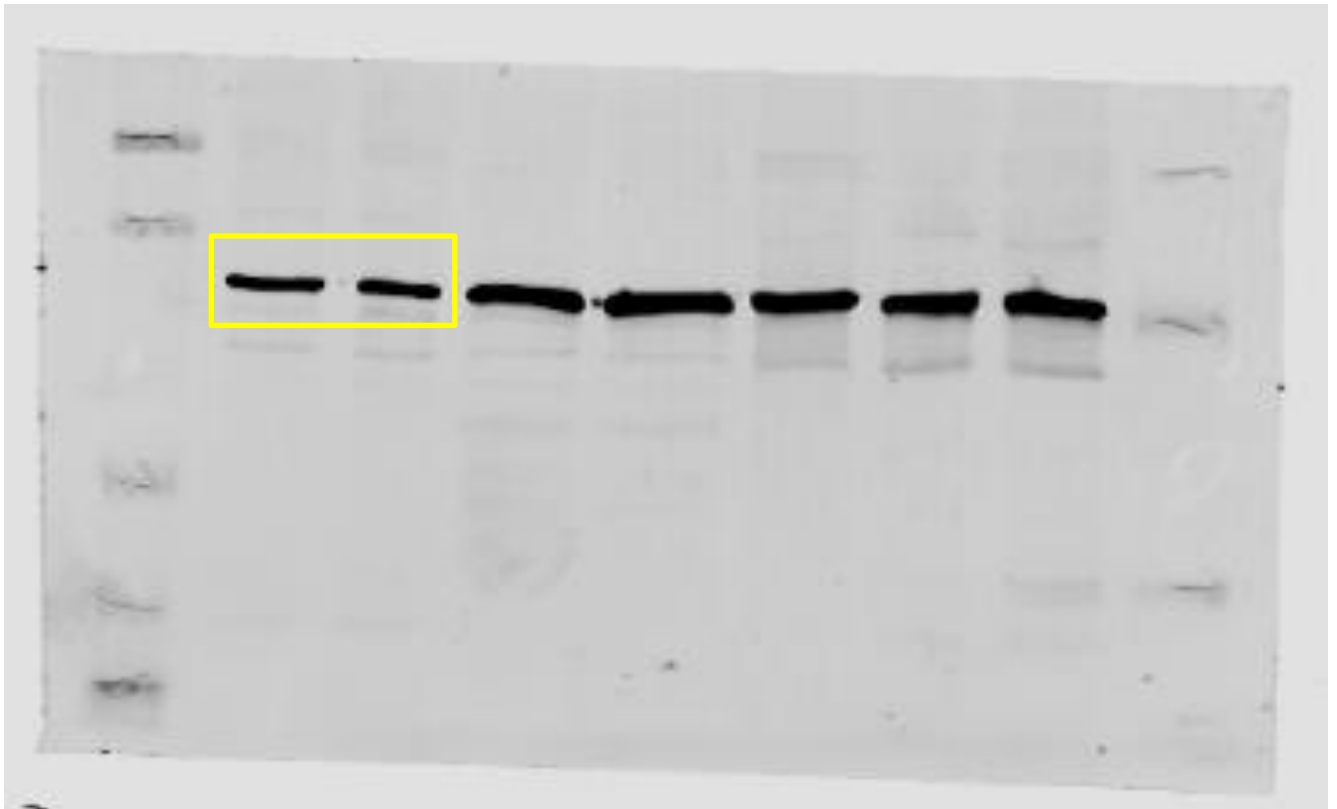

# NLRP3

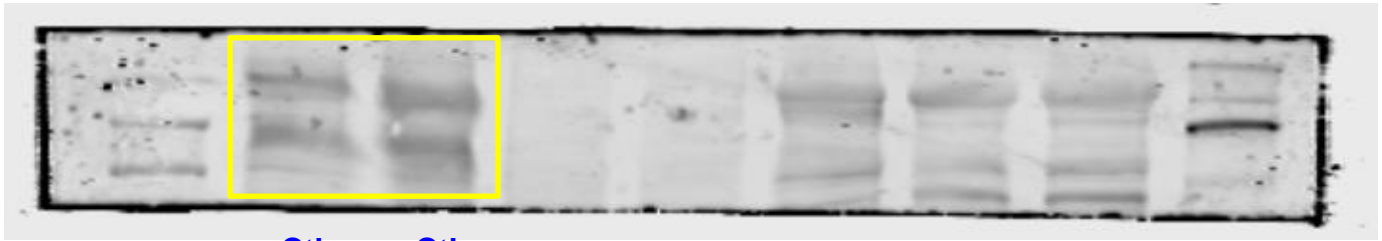

Ctl

Ctl

Blocking peptide

# GAPDH

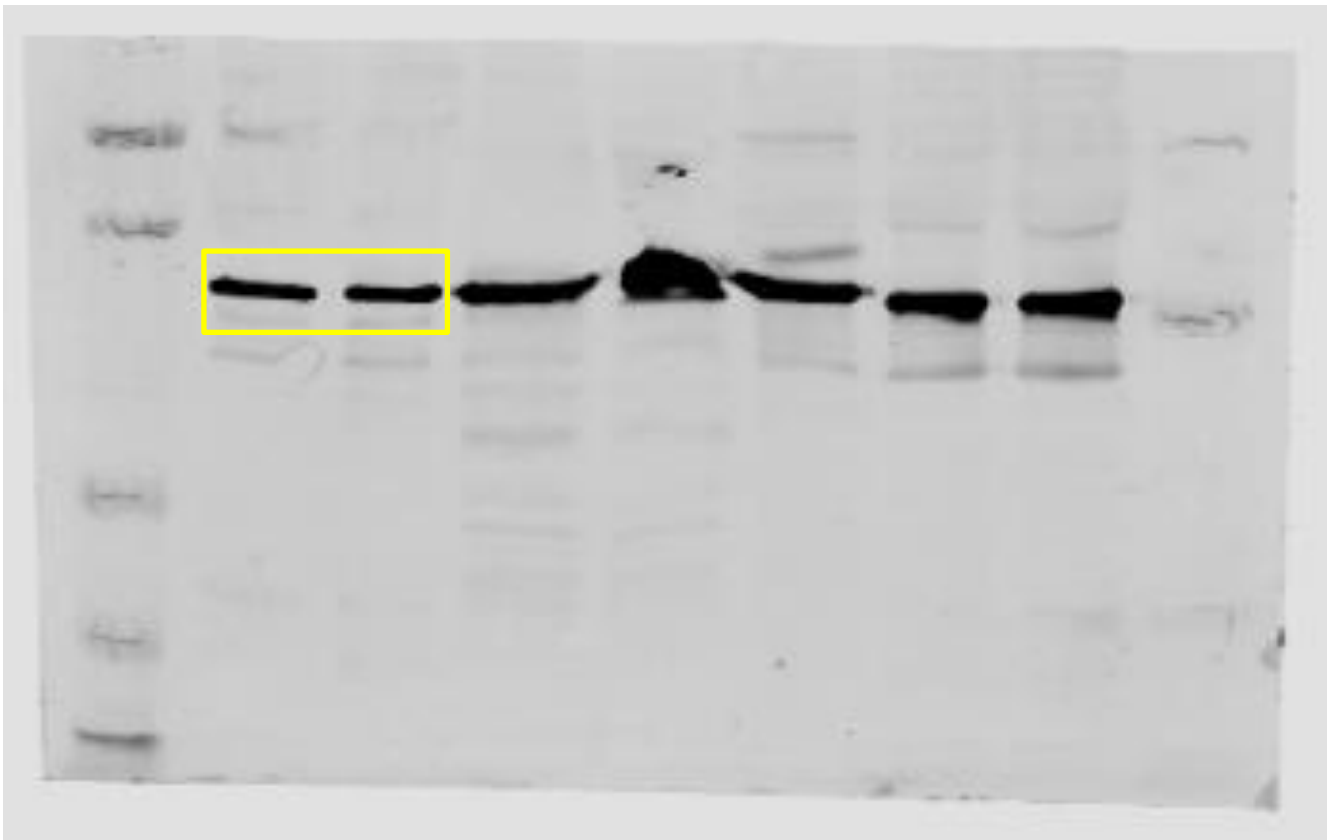

# NLRP3

ATR:  $\bar{}$   $\bar{}$   $\bar{}$   $\bar{}$   $\bar{}$   $\bar{}$   
CF CF CF CM CM CF

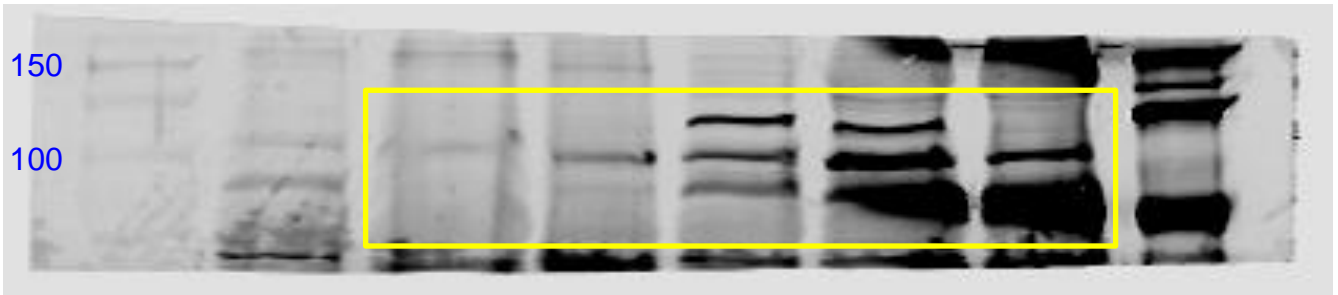

# GAPDH

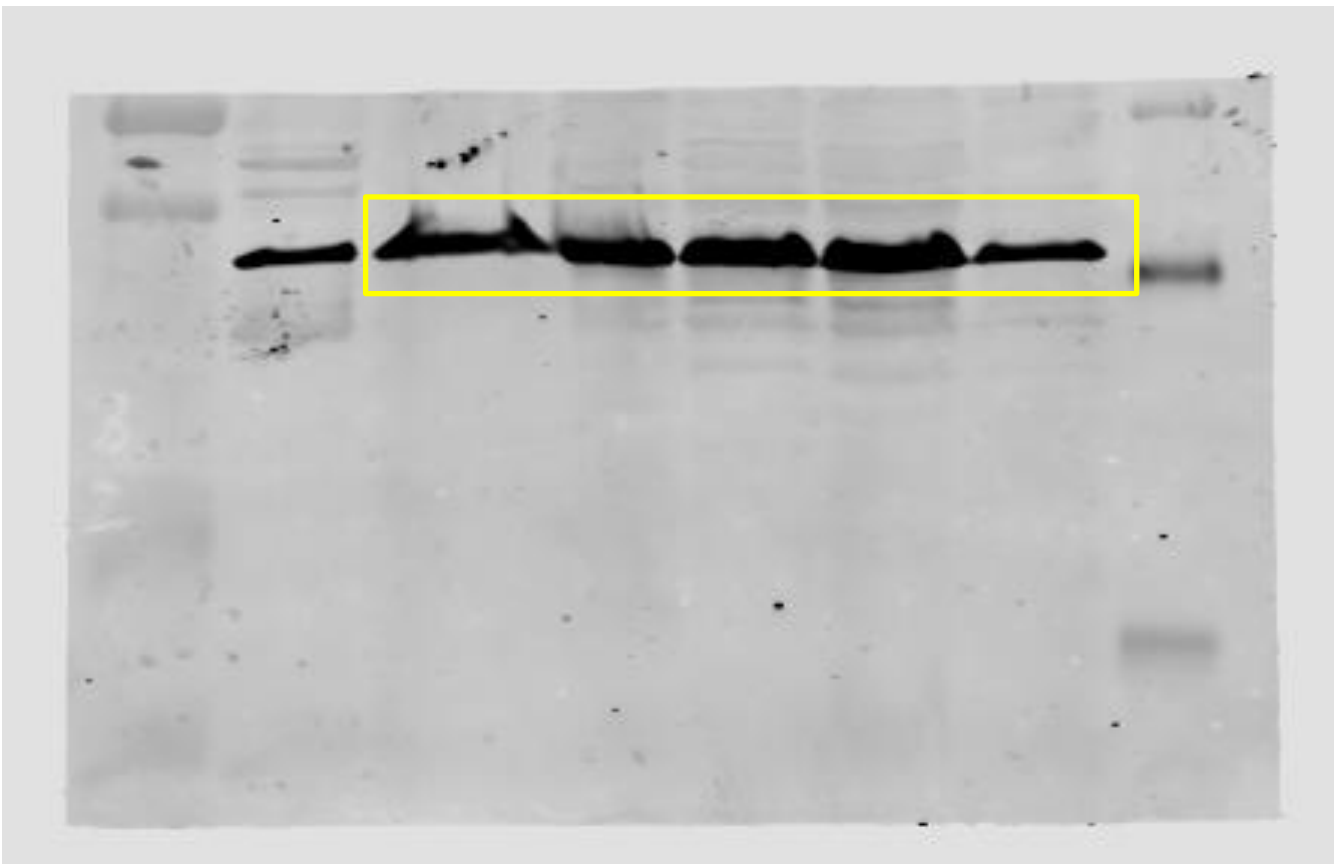

**Online Figure XIA – Canine atrial fibroblasts (CF) and atrial cardiomyocytes (CM)**

# ASC

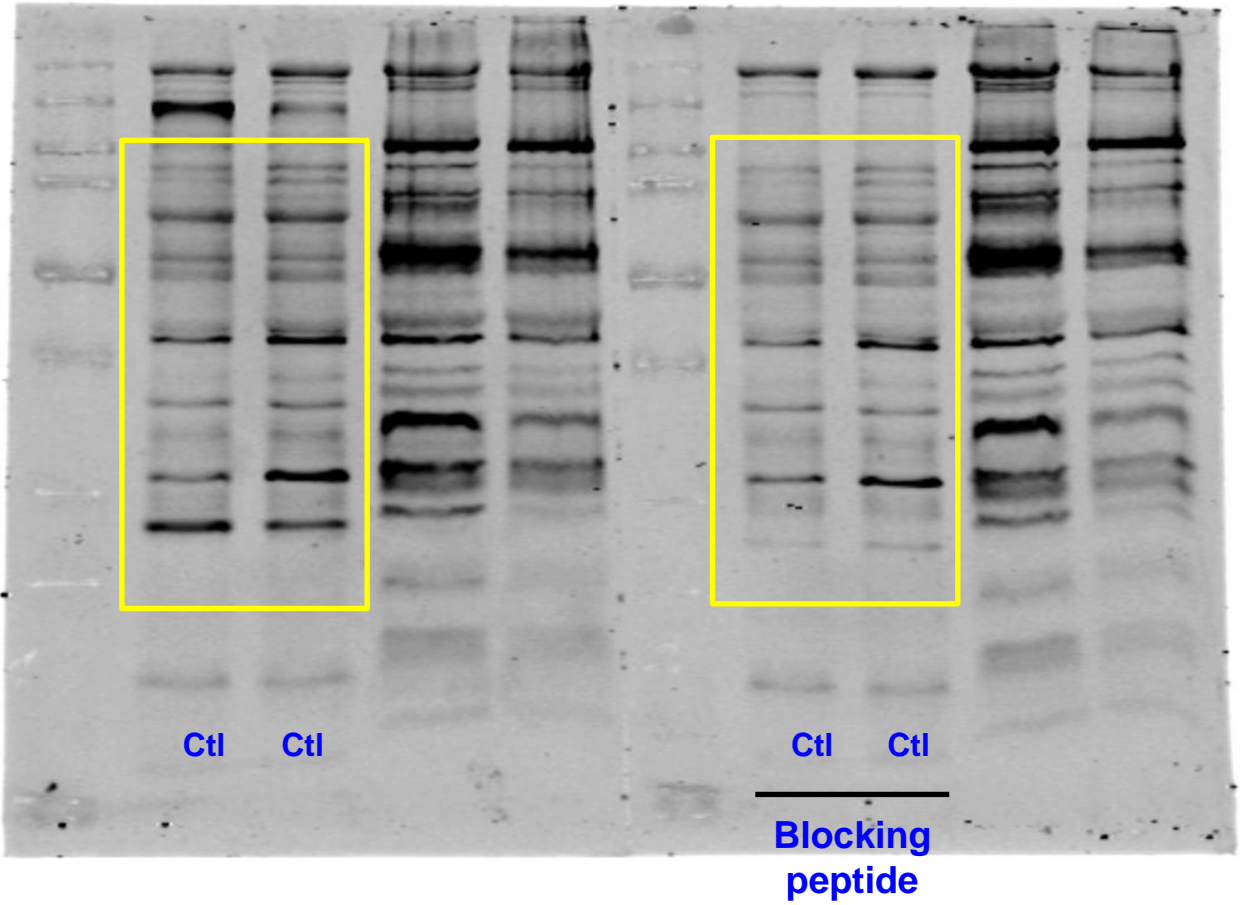

# GAPDH

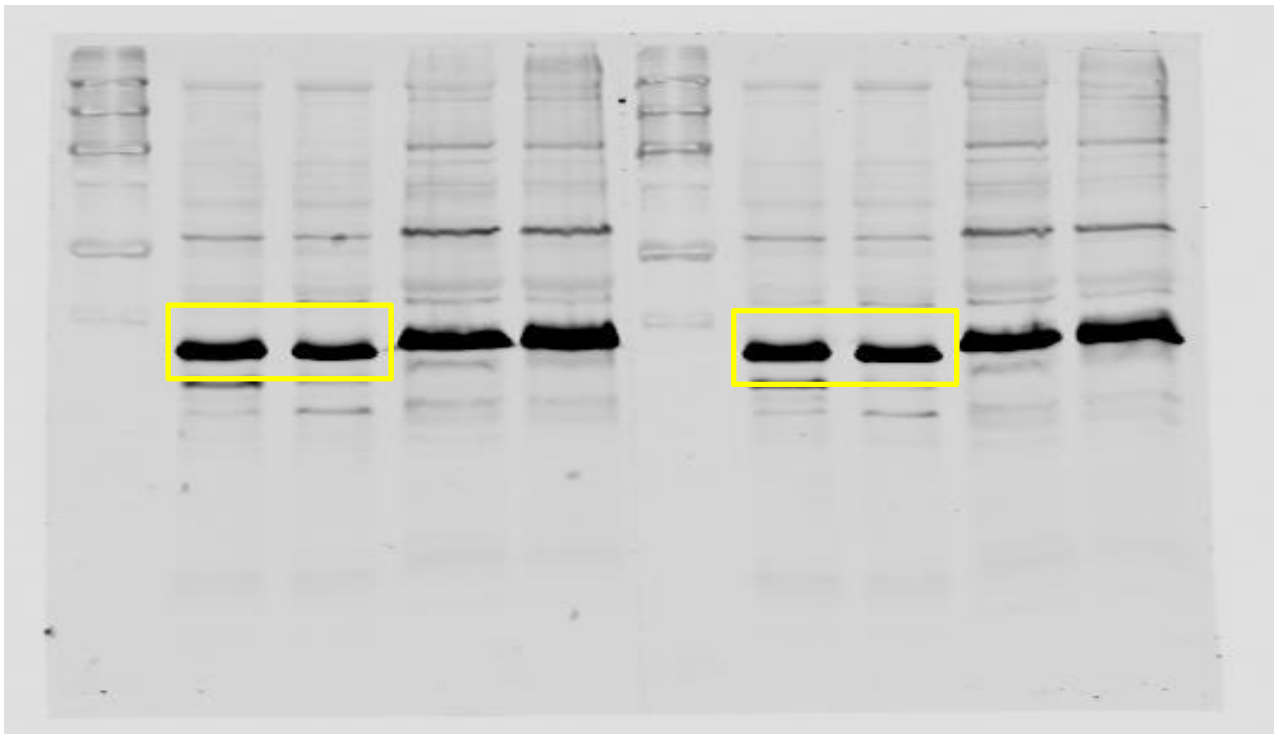

**Online Figure XIB – Human atrial whole-tissue lysates**



# ASC

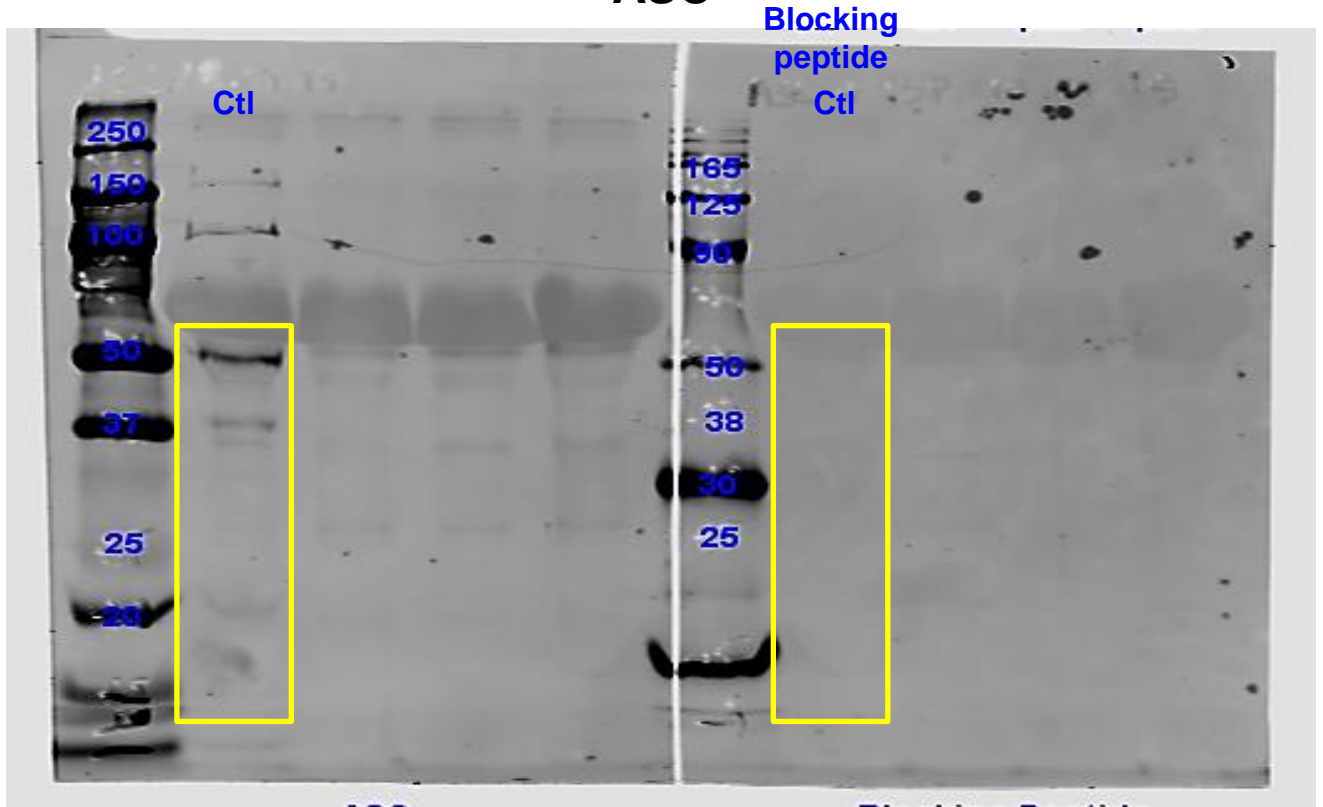

# Ponceau

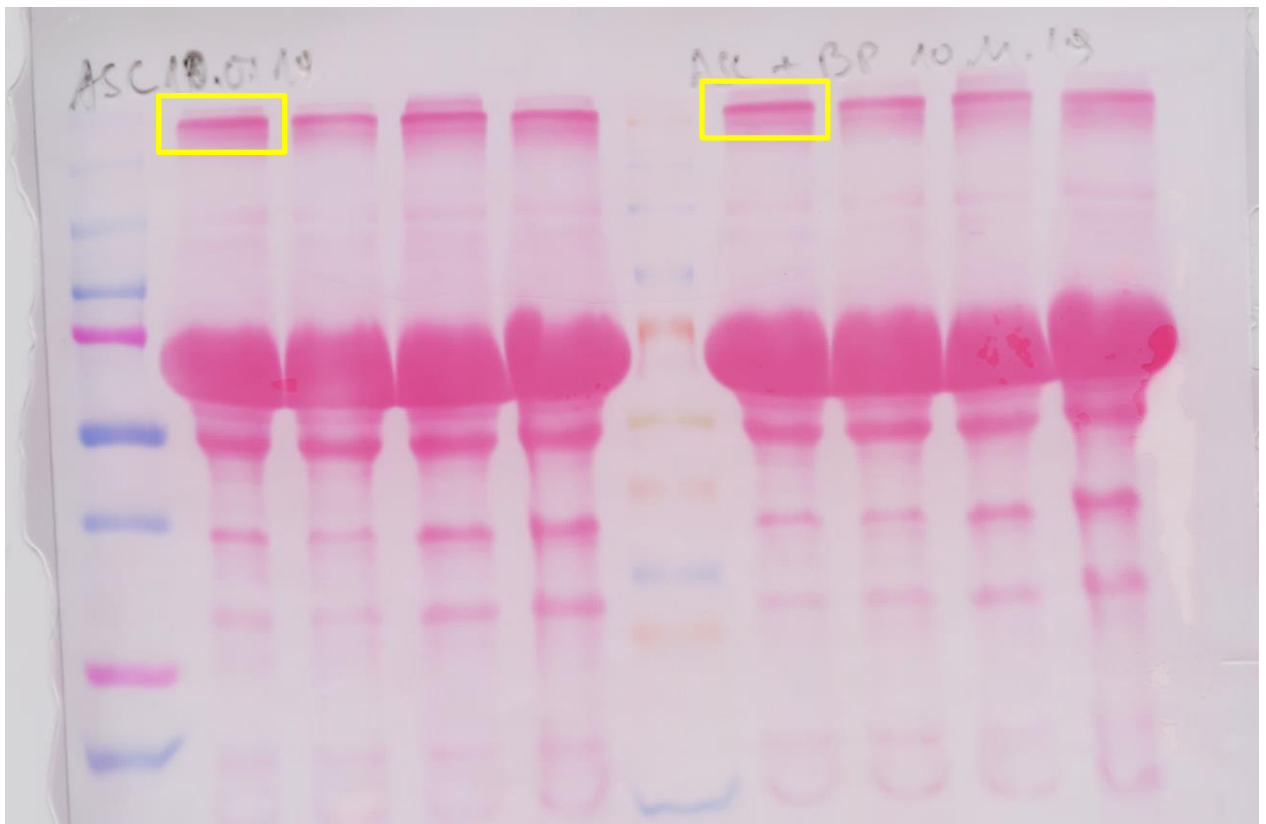

Online Figure XIC – Human atrial cardiomyocytes

# (Pro-)Caspase-1

Ctl Ctl POAF POAF

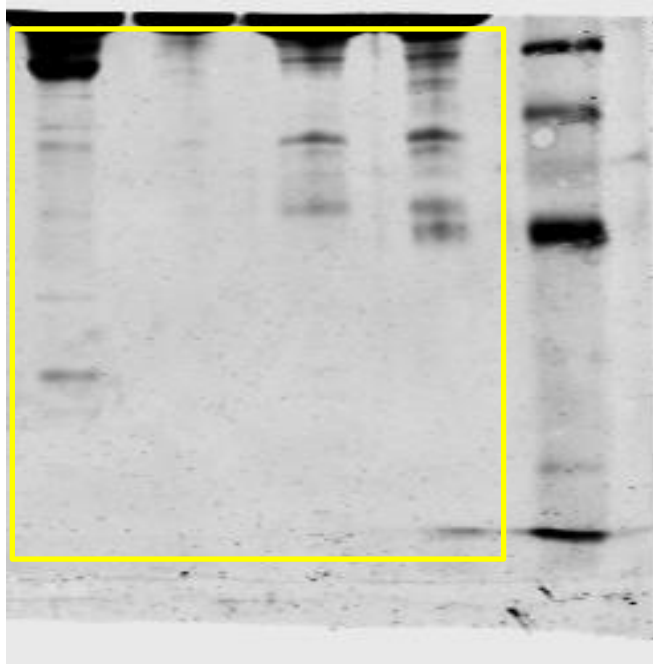

# Ponceau

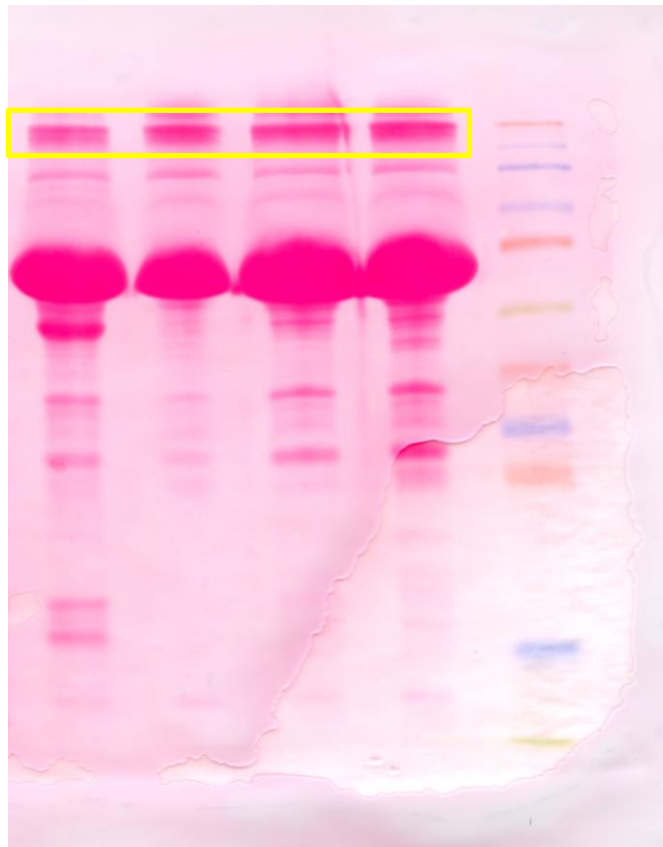

# (Pro-)Caspase-1

Ctl Ctl POAF POAF

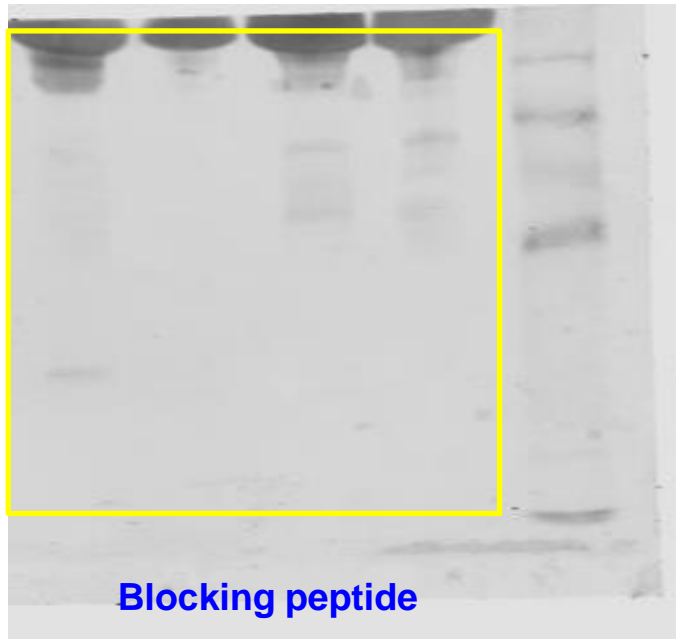

## Ponceau

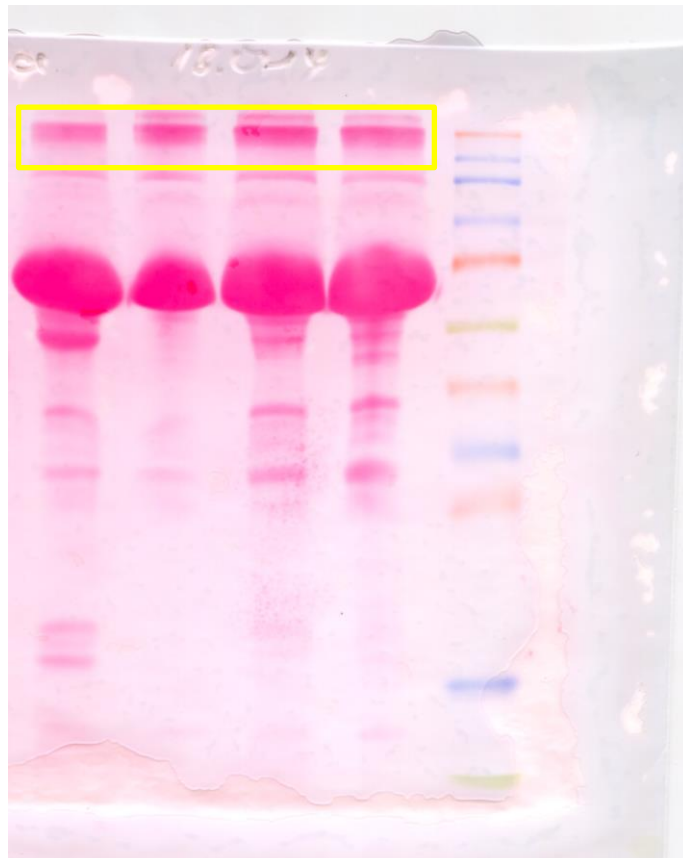

# Gasdermin-D

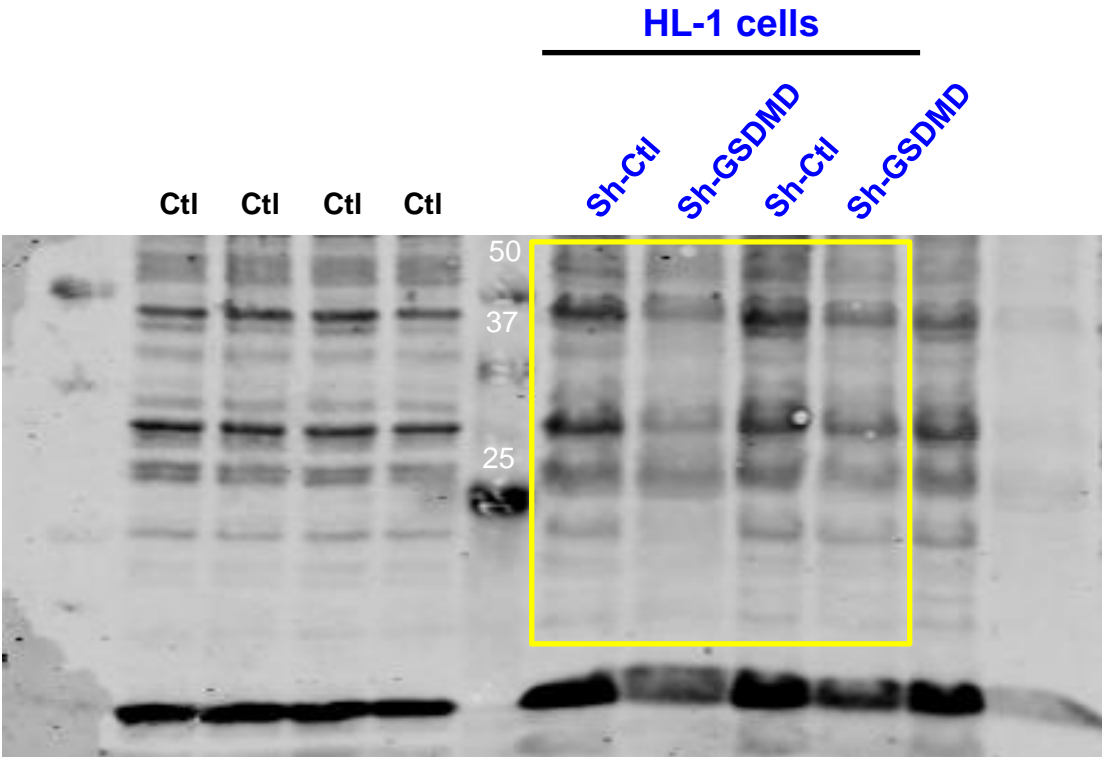

# GAPDH

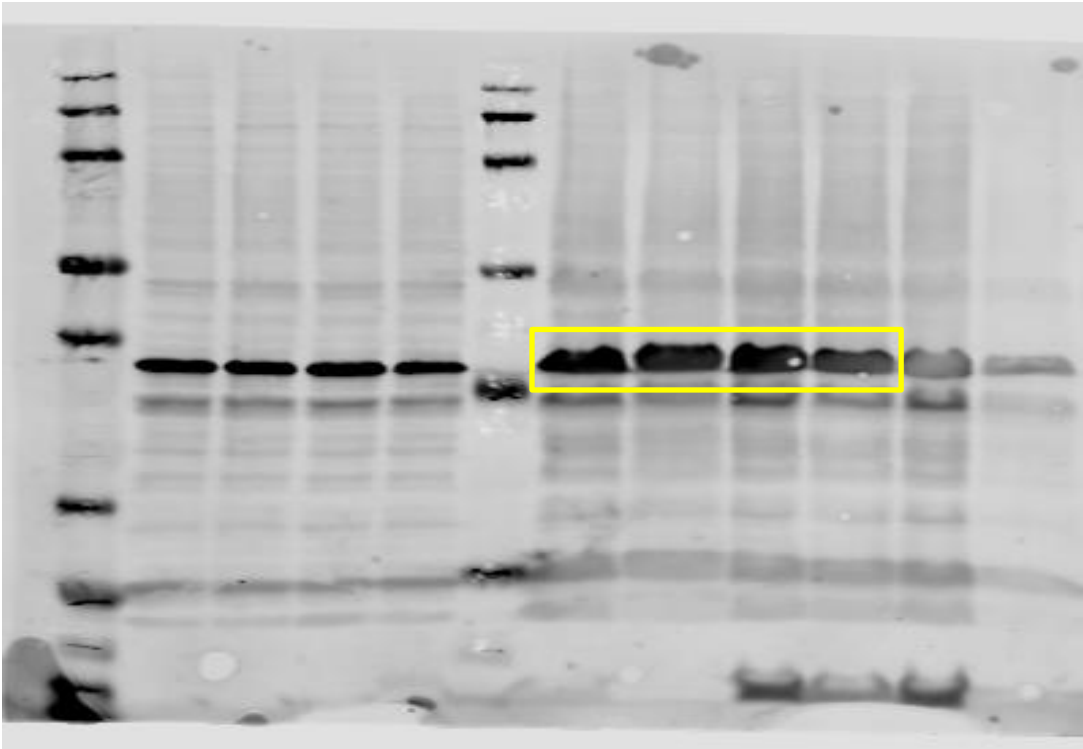

# (Pro-)Interleukin-1 $\beta$

Human atrial whole-tissue lysates

HL-1 cells

Recombinant IL-1 $\beta$

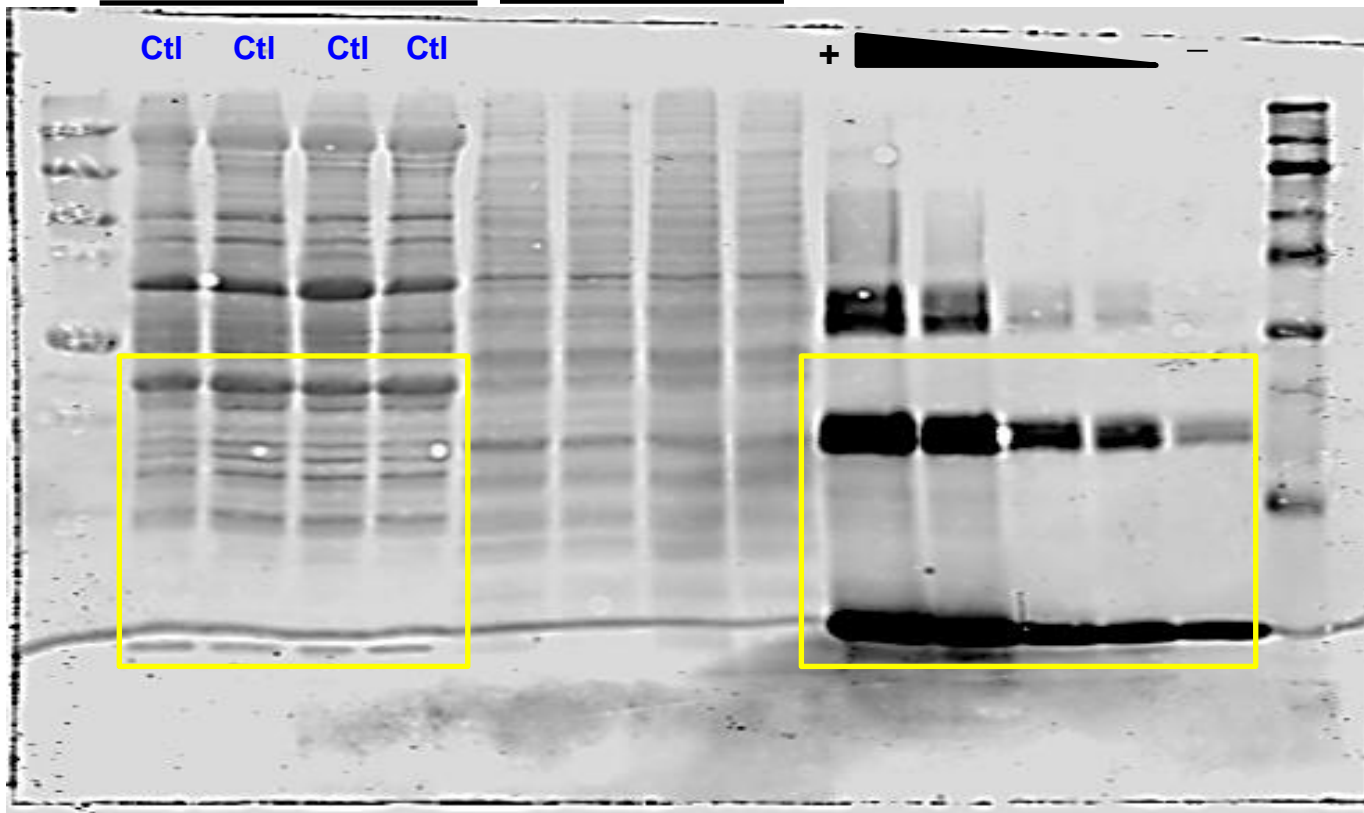

GAPDH

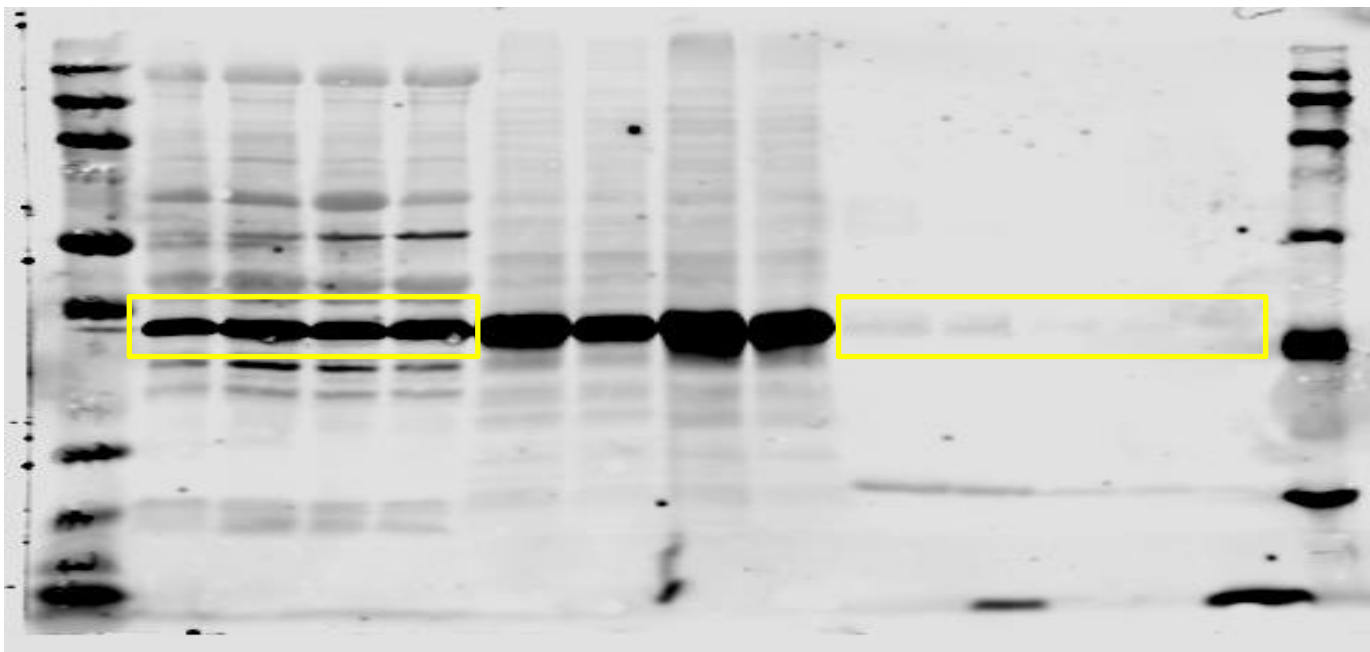

Gel 1 / 3

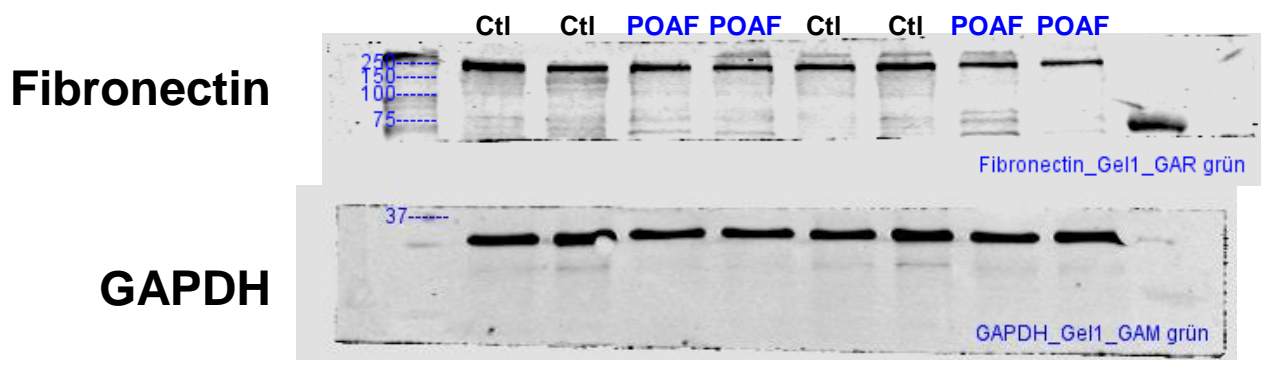

Gel 2 / 3

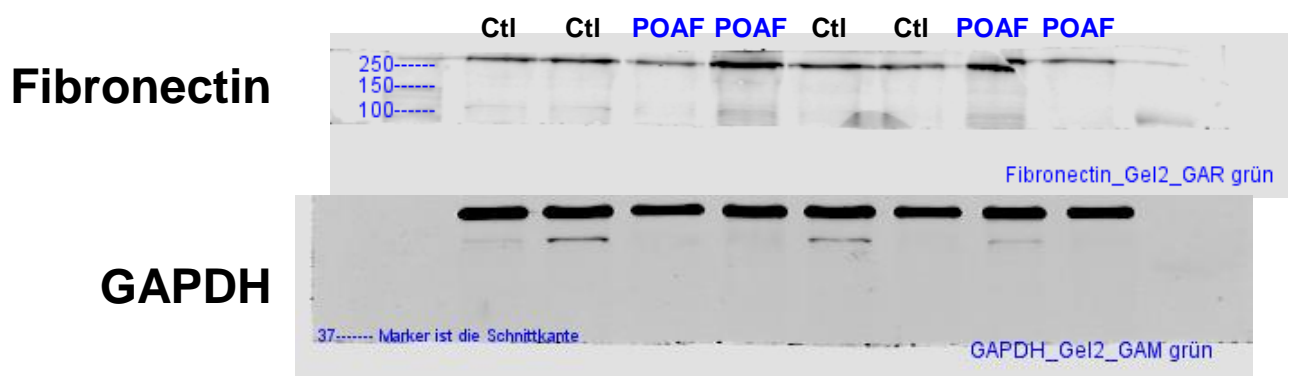

Gel 3 / 3

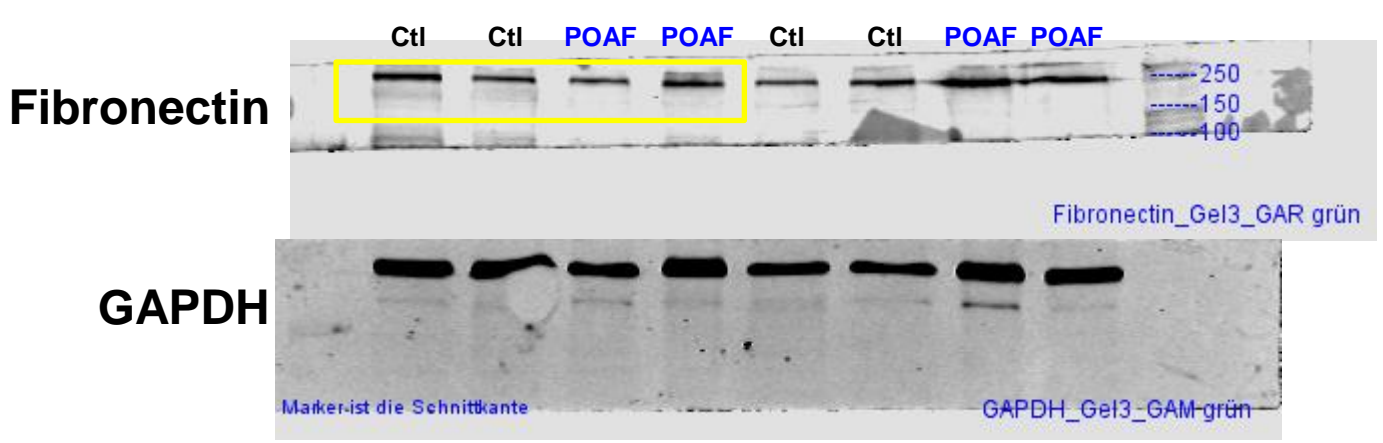

Online Figure XIII – Human atrial whole-tissue lysates

Gel 1 / 3

### Collagen-1a

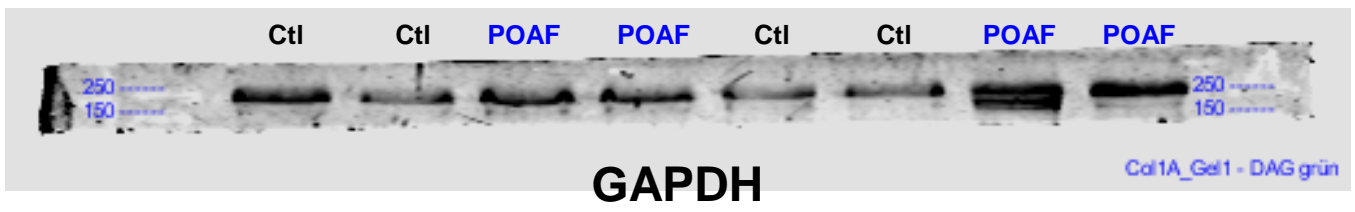

Gel 2 / 3

### Collagen-1a

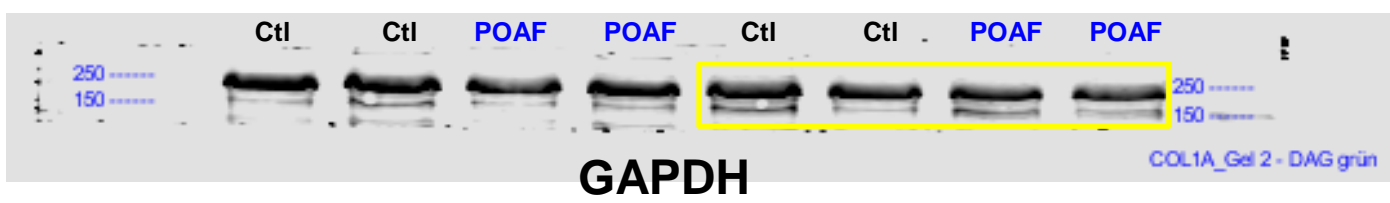

Gel 3 / 3

### Collagen-1a

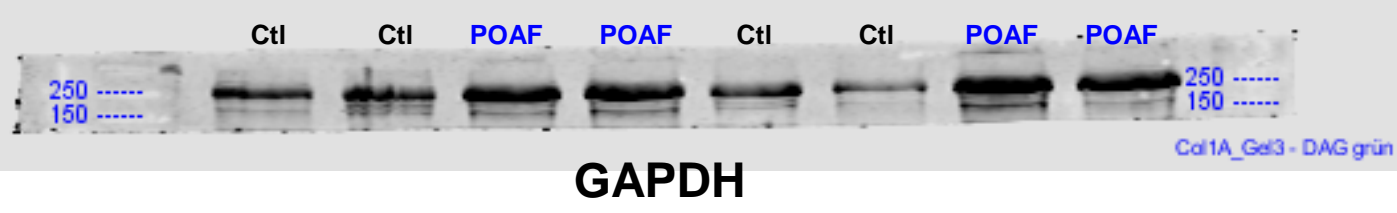

Gel 1 / 3

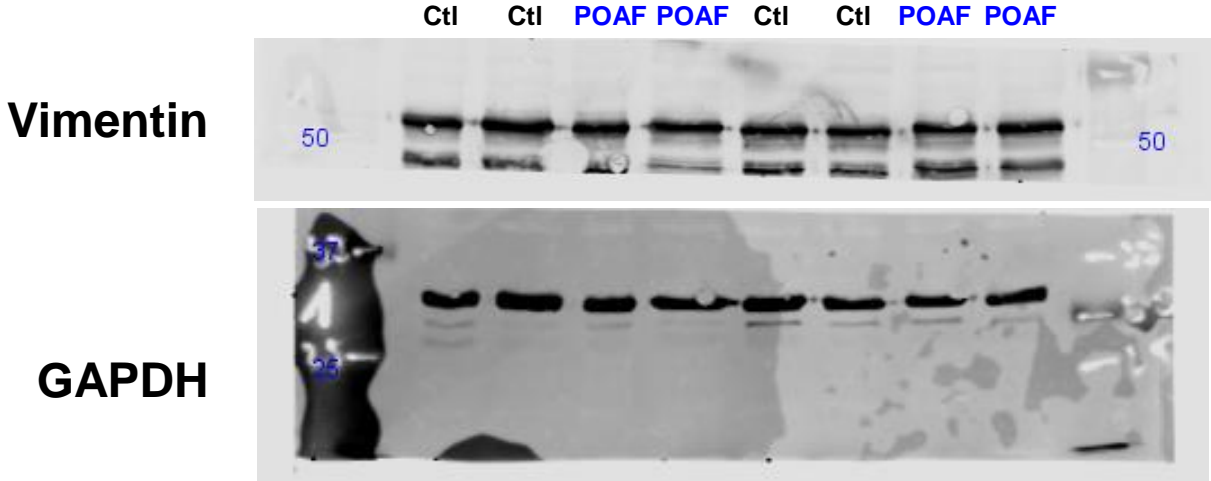

Gel 2 / 3

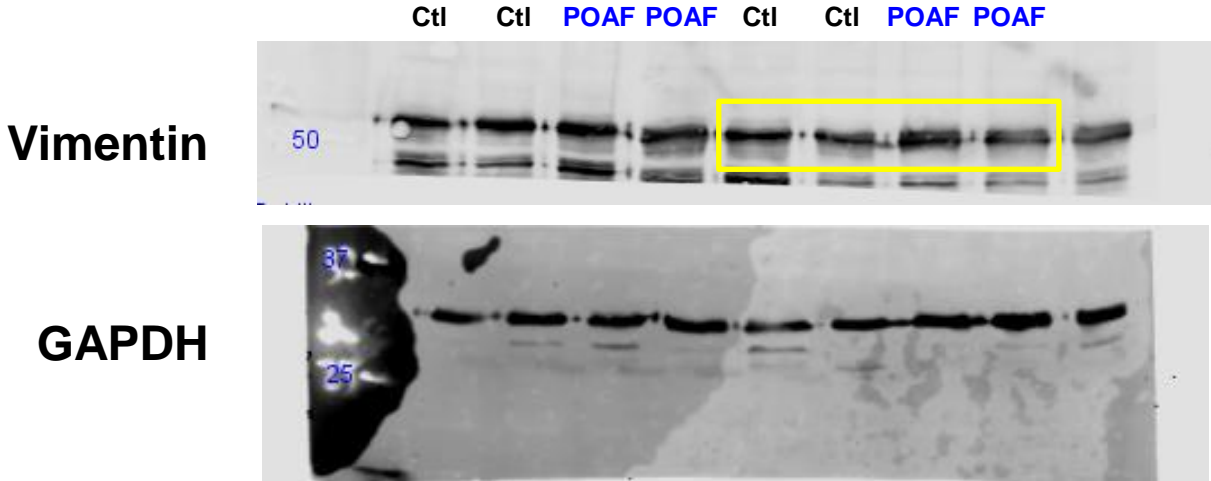

Gel 3 / 3

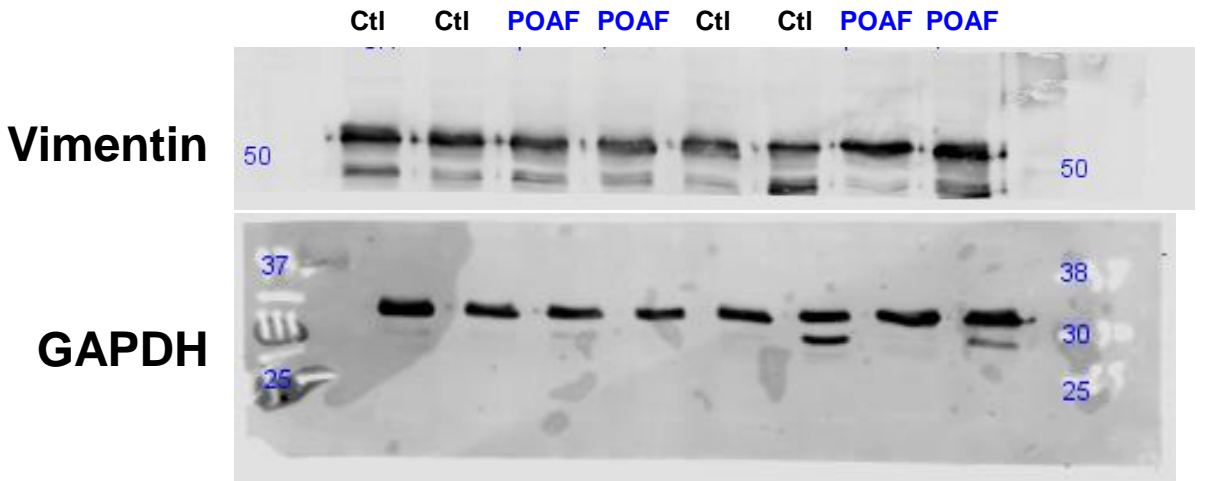

**Online Figure XIII – Human atrial whole-tissue lysates**



Gel 1 / 3

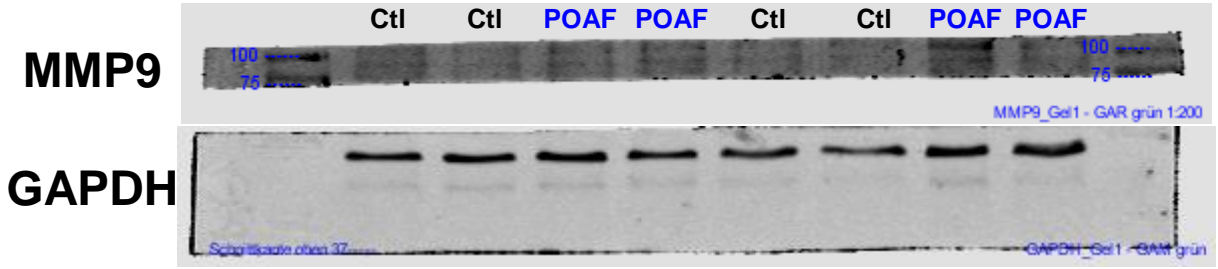

Gel 2 / 3

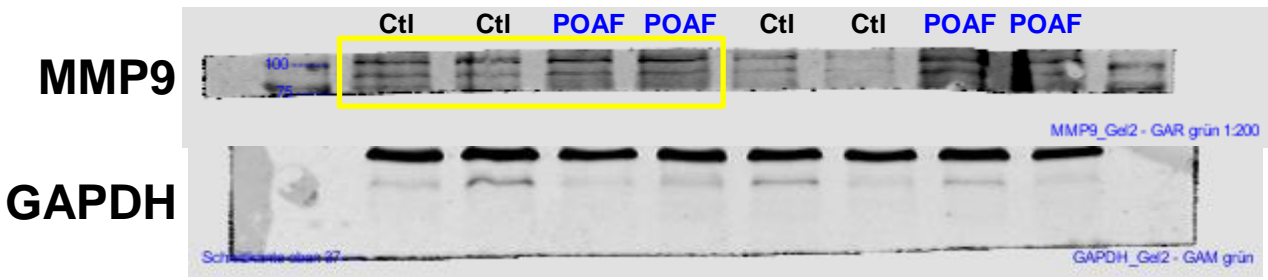

Gel 3 / 3

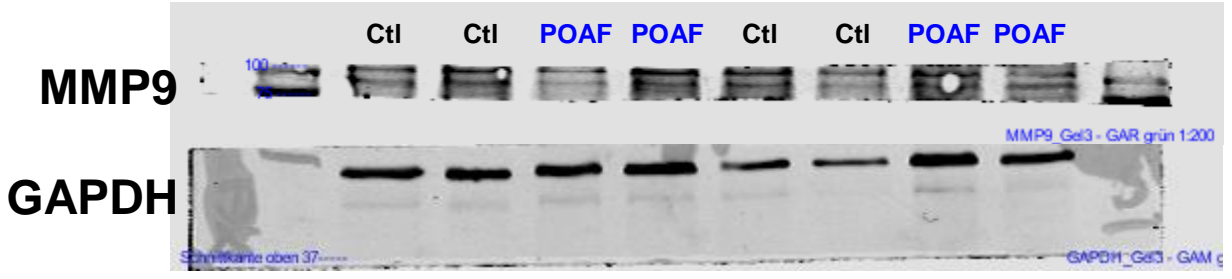

Online Figure XIII – Human atrial whole-tissue lysates

Gel 1 / 2

### $\alpha$ -SMA

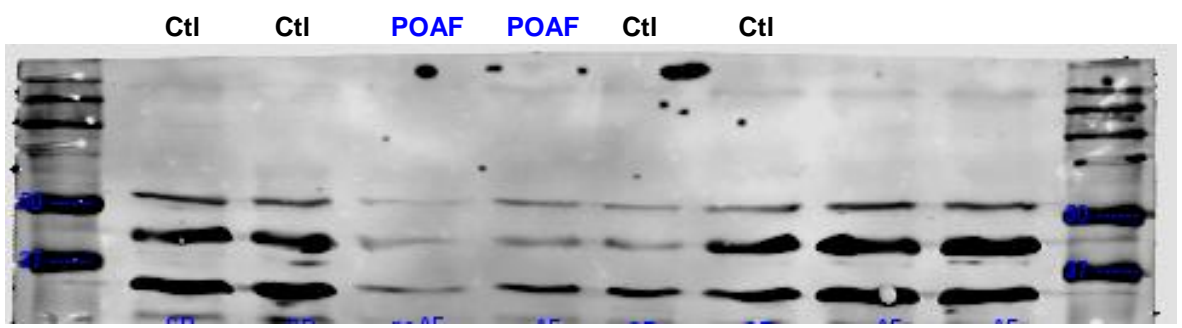

Gel 2 / 2

### $\alpha$ -SMA

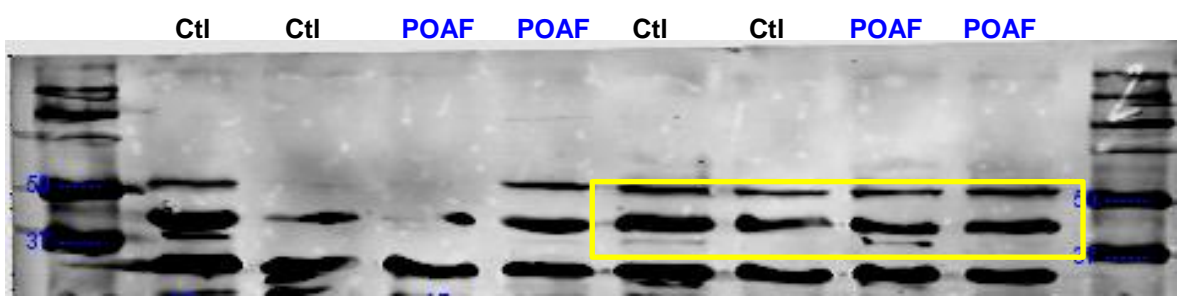

**Online Figure XIII – Human atrial whole-tissue lysates**

# TGF-β1

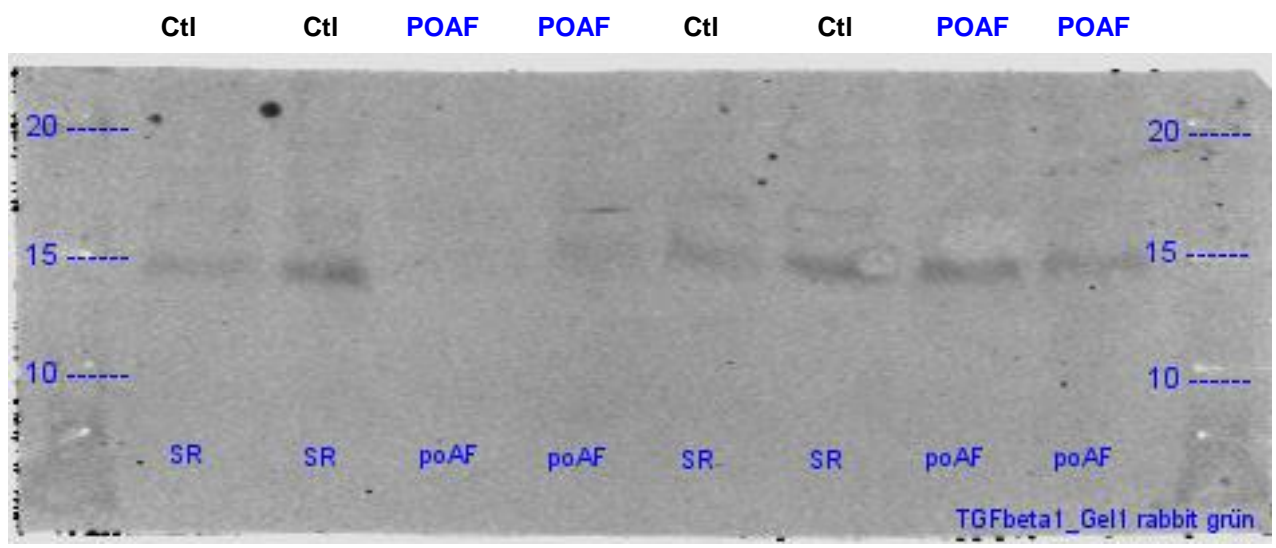

# TGF-β1

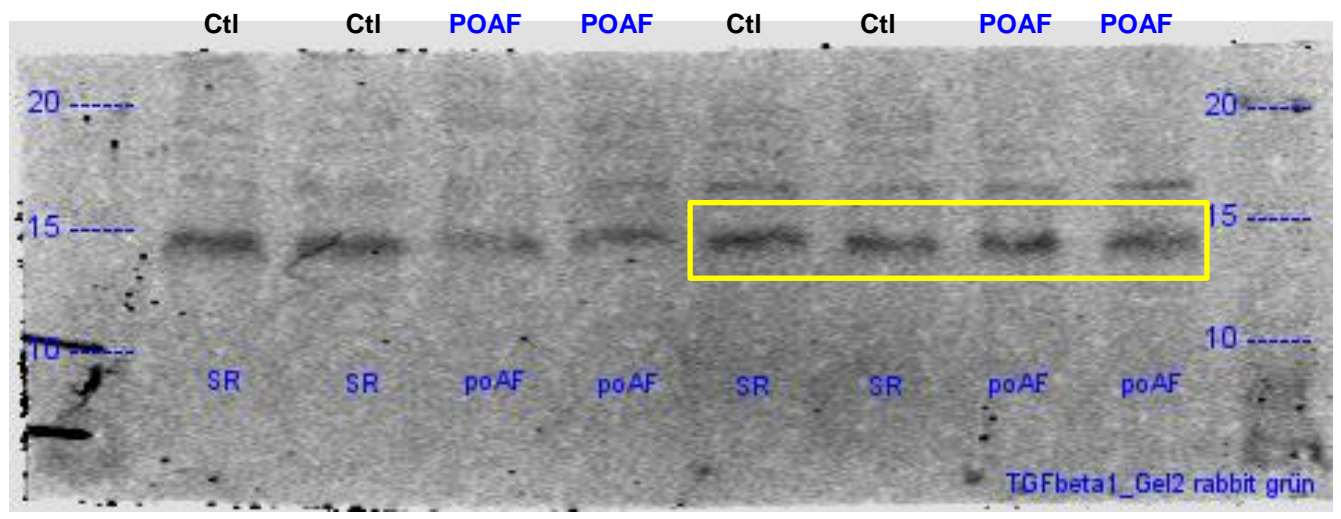

Gel 1 / 2

### Total-Connexin-40

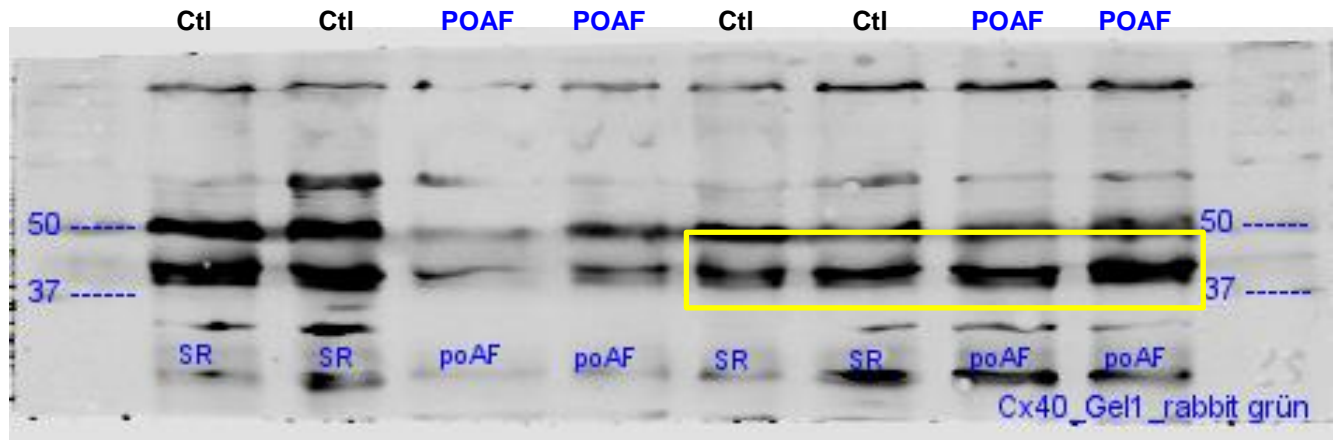

Gel 2 / 2

### Total-Connexin-40

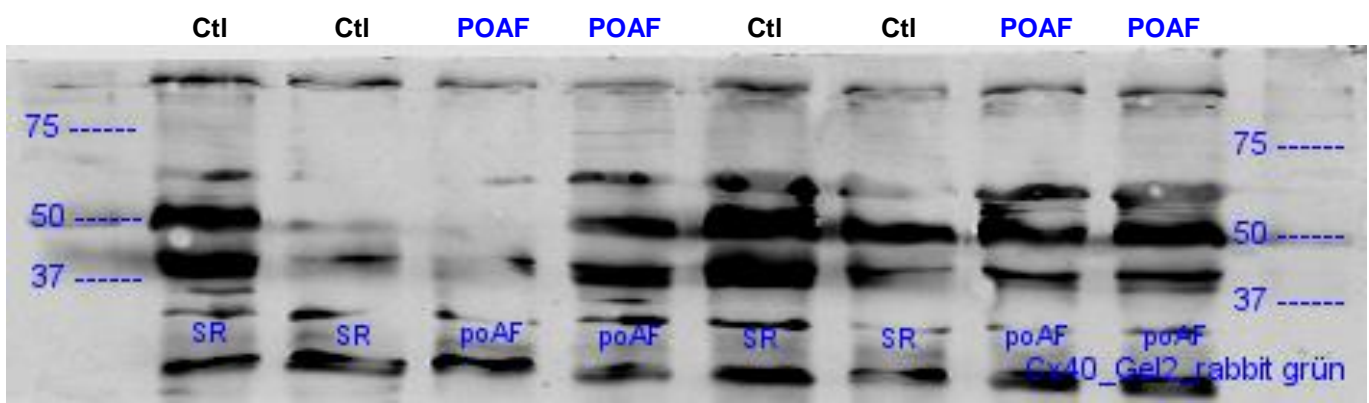

Online Figure XIV – Human atrial whole-tissue lysates

Gel 1 / 2

# Connexin-43

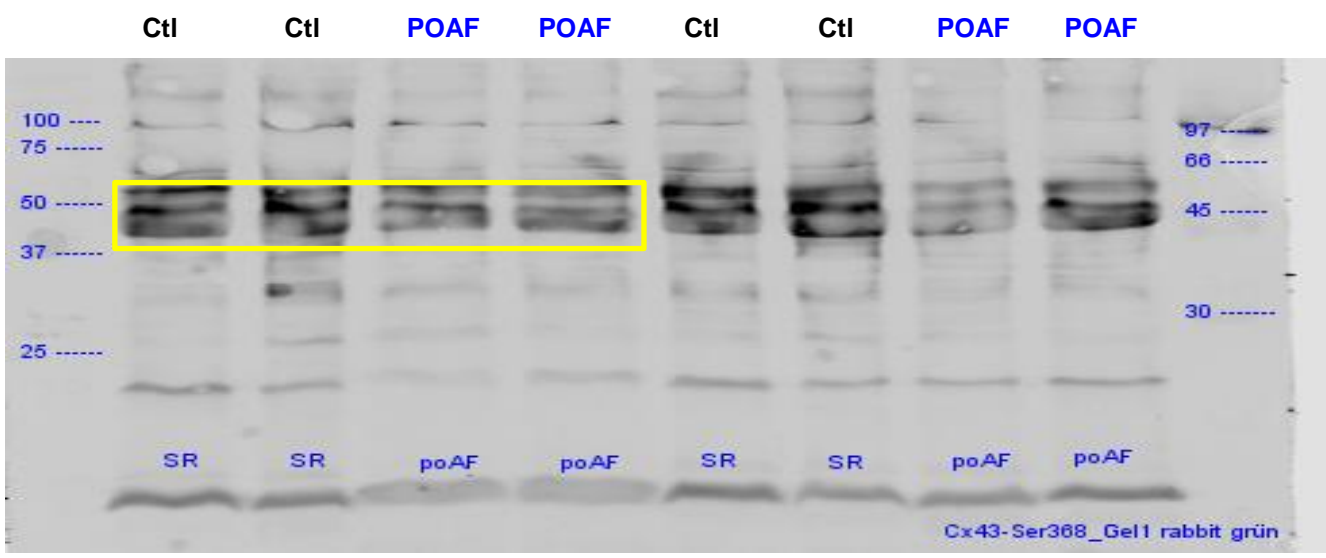

Gel 2 / 2

# Connexin-43

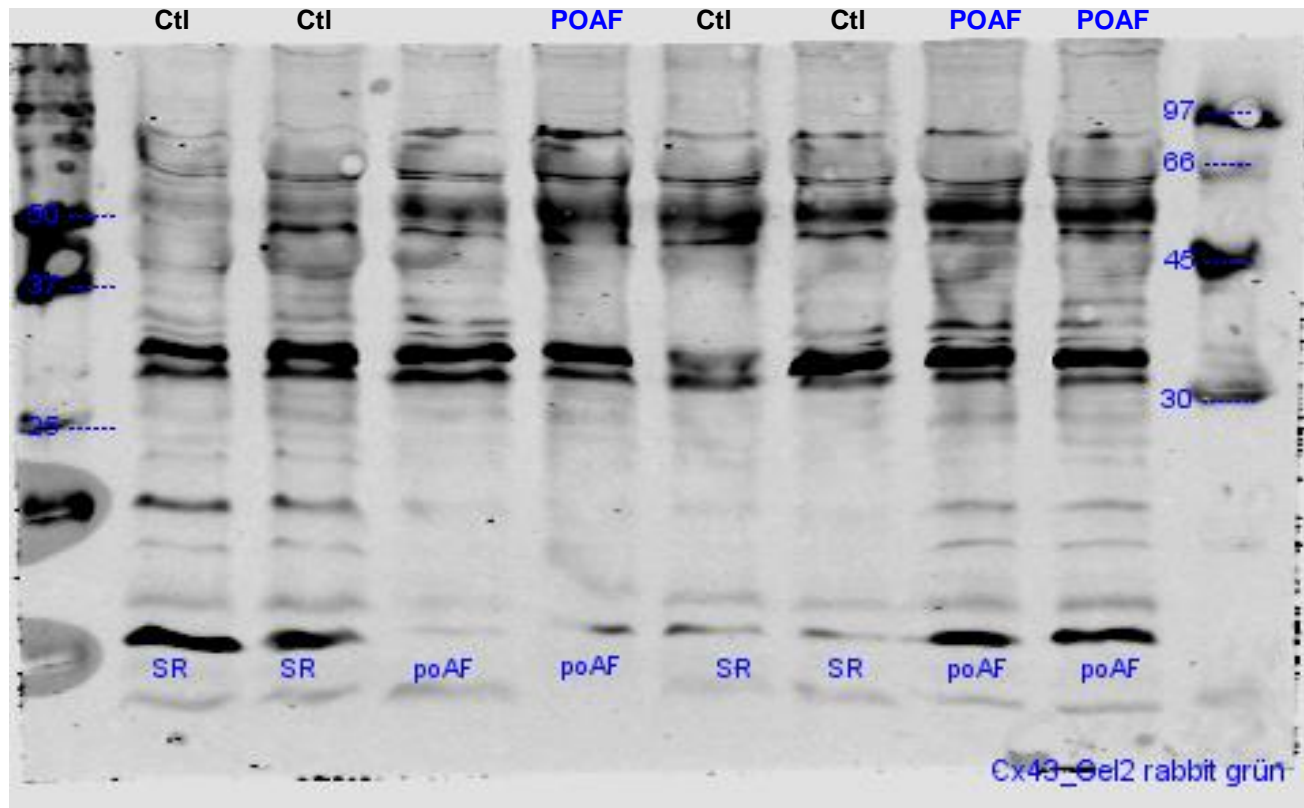

Online Figure XIV – Human atrial whole-tissue lysates

### GAPDH

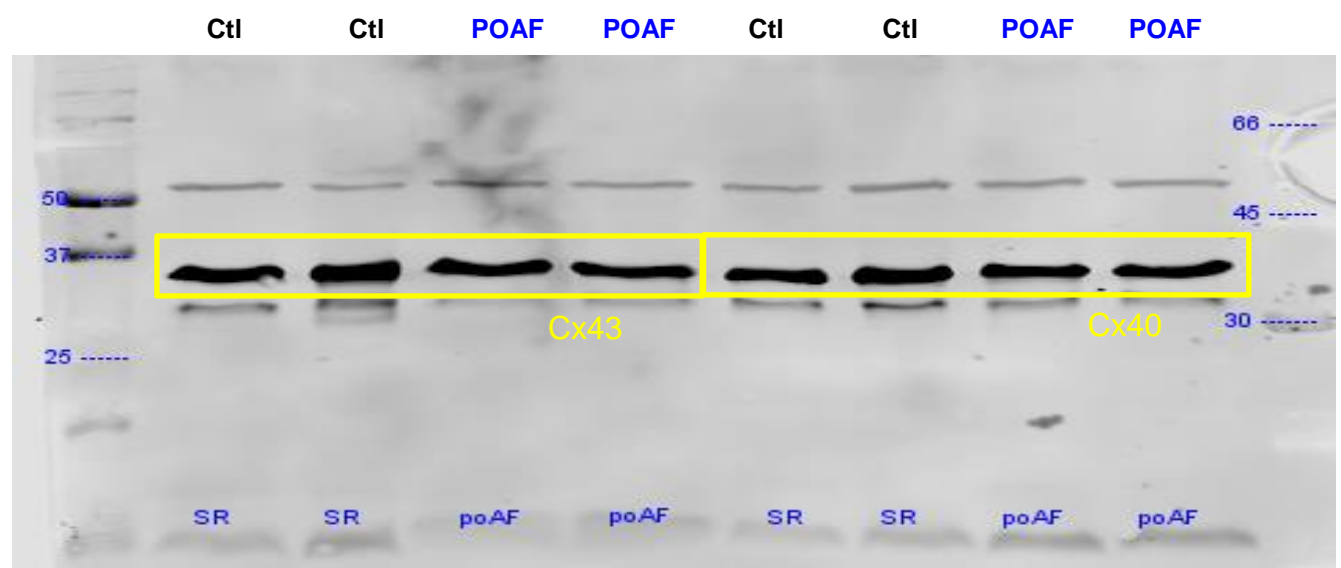

### GAPDH

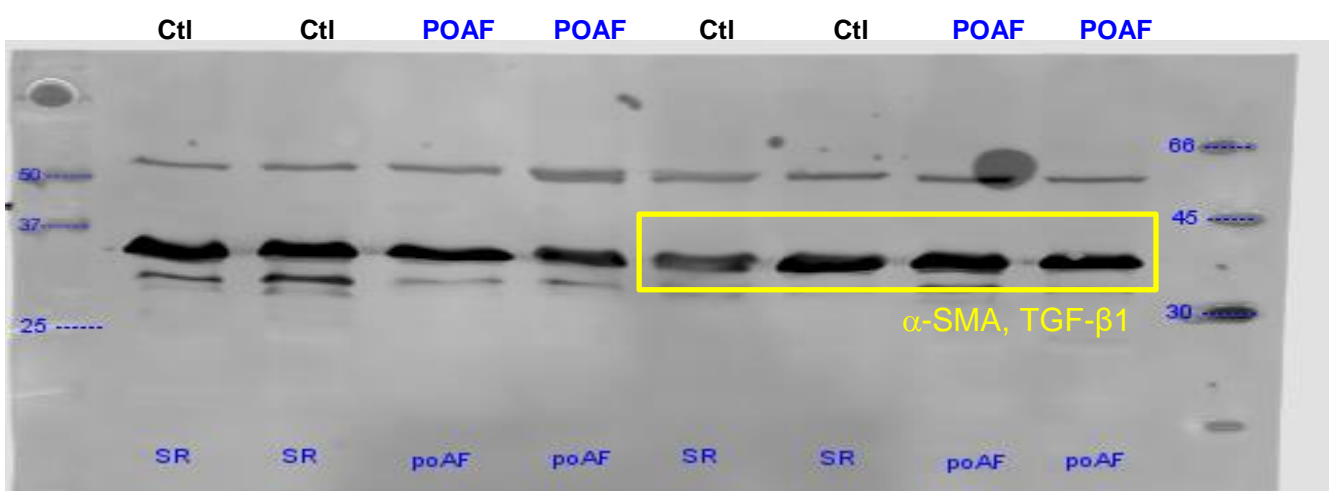

Supplement: NIHMS1617239-supplement-316710_Uncut_Gel_Blots.pdf [file NIHMS1617239-supplement-316710_Uncut_Gel_Blots.pdf]
