# Supplementary material
Source: PubMed Central journal article supplement (PMC7604886)
Supplement: NIHMS1617239-supplement-316710_Major_Resources_Table.pdf [file NIHMS1617239-supplement-316710_Major_Resources_Table.pdf]

## Major Resources Table

In order to allow validation and replication of experiments, all essential research materials listed in the Methods should be included in the Major Resources Table below. Authors are encouraged to use public repositories for protocols, data, code, and other materials and provide persistent identifiers and/or links to repositories when available. Authors may add or delete rows as needed.

### Animals (in vivo studies)

| Species | Vendor or Source                        | Background Strain | Sex | Persistent ID / URL |
|---------|-----------------------------------------|-------------------|-----|---------------------|
| Dog     | Montreal Heart Institute from Laka Inc. | Mongrel           | M/F |                     |

### Genetically Modified Animals

|                 | Species | Vendor or Source | Background Strain | Other Information | Persistent ID / URL |
|-----------------|---------|------------------|-------------------|-------------------|---------------------|
| Parent - Male   | N/A     |                  |                   |                   |                     |
| Parent - Female |         |                  |                   |                   |                     |

### Antibodies

| Target antigen           | Vendor or Source      | Catalog #                | Working concentration | Lot # (preferred but not required) | Persistent ID / URL                                                                                                                                                                                                                                                                                                                                                         |
|--------------------------|-----------------------|--------------------------|-----------------------|------------------------------------|-----------------------------------------------------------------------------------------------------------------------------------------------------------------------------------------------------------------------------------------------------------------------------------------------------------------------------------------------------------------------------|
| ASC                      | Santa Cruz            | sc-22514-R and sc-514414 | 1:500                 |                                    | <a href="https://www.scbt.com/p/asc-antibody-n-15">https://www.scbt.com/p/asc-antibody-n-15</a>                                                                                                                                                                                                                                                                             |
| $\alpha$ -SMA            | Sigma-Aldrich         | A5228                    | 1:500                 |                                    | <a href="https://www.sigmaaldrich.com/catalog/product/sigma/a5228">https://www.sigmaaldrich.com/catalog/product/sigma/a5228</a>                                                                                                                                                                                                                                             |
| Calmodulin               | Abcam                 | ab45689                  | 1:1,000               |                                    | <a href="https://www.abcam.com/calmodulin-123-antibody-ep799y-c-terminal-ab45689.html">https://www.abcam.com/calmodulin-123-antibody-ep799y-c-terminal-ab45689.html</a>                                                                                                                                                                                                     |
| Calsequestrin2           | Thermo Fisher         | PA1-913                  | 1:2,500               |                                    | <a href="https://www.thermofisher.com/antibody/product/Calsequestrin-Antibody-Polyclonal/PA1-913">https://www.thermofisher.com/antibody/product/Calsequestrin-Antibody-Polyclonal/PA1-913</a>                                                                                                                                                                               |
| CaMKII $\delta$ (Total)  | BD Biosciences        | 611293                   | 1:1,000               |                                    | <a href="https://www.bdbiosciences.com/us/reagents/research/antibodies-buffers/cell-biology-reagents/cell-biology-antibodies/purified-mouse-anti-cam-kinase-ii-45cam-kinase-ii/p/611293">https://www.bdbiosciences.com/us/reagents/research/antibodies-buffers/cell-biology-reagents/cell-biology-antibodies/purified-mouse-anti-cam-kinase-ii-45cam-kinase-ii/p/611293</a> |
| CaMKII $\delta$ (Thr287) | Abcam                 | ab32678                  | 1:1,000               |                                    | <a href="https://www.abcam.com/camkii-phospho-t286-antibody-ab32678.html">https://www.abcam.com/camkii-phospho-t286-antibody-ab32678.html</a>                                                                                                                                                                                                                               |
| (Pro-)Caspase-1          | Santa Cruz and AMSBio | sc-56036 and 3019-100    | 1:250                 |                                    | <a href="https://www.scbt.com/p/caspase-1-antibody-14f468">https://www.scbt.com/p/caspase-1-antibody-14f468</a><br><a href="https://www.amsbio.com/caspase-1-antibody-3019-100">https://www.amsbio.com/caspase-1-antibody-3019-100</a>                                                                                                                                      |
| Caspase-1 (p20)          | AdipoGen              | AG-20B-0042-C100         | 1:500                 |                                    | <a href="https://adipogen.com/ag-20b-0042-anti-caspase-1-p20-mouse-mab-casper-1.html/">https://adipogen.com/ag-20b-0042-anti-caspase-1-p20-mouse-mab-casper-1.html/</a>                                                                                                                                                                                                     |
| CD68                     | Abcam                 | ab201973                 | 1:200                 |                                    | <a href="https://www.abcam.com/cd68-antibody-3f7d3-ab201973.html">https://www.abcam.com/cd68-antibody-3f7d3-ab201973.html</a>                                                                                                                                                                                                                                               |
| CD206                    | Abcam                 | ab64693                  | 1:500                 |                                    | <a href="https://www.abcam.com/mannose-receptor-antibody-ab64693.html">https://www.abcam.com/mannose-receptor-antibody-ab64693.html</a>                                                                                                                                                                                                                                     |
| Collagen1a1              | Santa Cruz            | sc-25974                 | 1:200                 |                                    | <a href="https://www.scbt.com/p/col1a1-antibody-d-13">https://www.scbt.com/p/col1a1-antibody-d-13</a>                                                                                                                                                                                                                                                                       |

DOI [to be added]

|                        |                                 |                     |          |  |                                                                                                                                                                                                                                                                                                                      |
|------------------------|---------------------------------|---------------------|----------|--|----------------------------------------------------------------------------------------------------------------------------------------------------------------------------------------------------------------------------------------------------------------------------------------------------------------------|
| Connexin40             | Merck Millipore                 | AB1726              | 1:500    |  | <a href="https://www.merckmillipore.com/NL/en/product/Anti-Connexin-40-Antibody,MM_NF-AB1726">https://www.merckmillipore.com/NL/en/product/Anti-Connexin-40-Antibody,MM_NF-AB1726</a>                                                                                                                                |
| Connexin43             | Cell Signaling                  | 3511                | 1:200    |  | <a href="https://www.cellsignal.com/products/primary-antibodies/phospho-connexin-43-ser368-antibody/3511">https://www.cellsignal.com/products/primary-antibodies/phospho-connexin-43-ser368-antibody/3511</a>                                                                                                        |
| F4/80                  | Abcam                           | ab16911             | 1:500    |  | <a href="https://www.abcam.com/f480-antibody-bm8-ab16911.html">https://www.abcam.com/f480-antibody-bm8-ab16911.html</a>                                                                                                                                                                                              |
| Fibronectin            | Santa Cruz                      | sc-8422             | 1:1,000  |  | <a href="https://www.scbt.com/p/fibronectin-antibody-ep5">https://www.scbt.com/p/fibronectin-antibody-ep5</a>                                                                                                                                                                                                        |
| GAPDH                  | HyTest                          | 5G4 6C5             | 1:20,000 |  | <a href="https://shop.hytest.fi/product/glyceraldehyde-3-phosphate-dehydrogenase-gapdh-antibody">https://shop.hytest.fi/product/glyceraldehyde-3-phosphate-dehydrogenase-gapdh-antibody</a>                                                                                                                          |
| Gasdermin-D            | Thermo Fisher and Sigma-Aldrich | PA5-30823 and G7422 | 1:500    |  | <a href="https://www.thermofisher.com/antibody/product/GSDMD-Antibody-Polyclonal/PA5-30823">https://www.thermofisher.com/antibody/product/GSDMD-Antibody-Polyclonal/PA5-30823</a><br><a href="https://www.sigmaaldrich.com/catalog/product/sigma/g7422">https://www.sigmaaldrich.com/catalog/product/sigma/g7422</a> |
| (Pro-)IL-1 $\beta$     | Abcam                           | ab9722              | 1:250    |  | <a href="https://www.abcam.com/il-1-beta-antibody-ab9722.html">https://www.abcam.com/il-1-beta-antibody-ab9722.html</a>                                                                                                                                                                                              |
| MMP9                   | Abcam                           | ab38898             | 1:200    |  | <a href="https://www.abcam.com/mmp9-antibody-ab38898.html">https://www.abcam.com/mmp9-antibody-ab38898.html</a>                                                                                                                                                                                                      |
| cMyBP-C                | Abcam                           | ab133499            | 1:1,000  |  | <a href="https://www.abcam.com/mybpc3-antibody-epr30092-ab133499.html">https://www.abcam.com/mybpc3-antibody-epr30092-ab133499.html</a>                                                                                                                                                                              |
| NCX1                   | Swant                           | R3F1                | 1:1,000  |  | <a href="https://www.swant.com/pdfs/Monoclonal_anti_Na-Ca-exchanger.pdf">https://www.swant.com/pdfs/Monoclonal_anti_Na-Ca-exchanger.pdf</a>                                                                                                                                                                          |
| NF $\kappa$ B (Total)  | Novus Biologicals               | NB100-56712         | 1:500    |  | <a href="https://www.novusbio.com/products/rela-nfkb-p65-antibody-112a1021_nb100-56712">https://www.novusbio.com/products/rela-nfkb-p65-antibody-112a1021_nb100-56712</a>                                                                                                                                            |
| NF $\kappa$ B (Ser536) | Novus Biologicals               | NB100-82088         | 1:500    |  | <a href="https://www.novusbio.com/products/rela-nfkb-p65-antibody_nb100-82088">https://www.novusbio.com/products/rela-nfkb-p65-antibody_nb100-82088</a>                                                                                                                                                              |
| NLRP3                  | Novus Biologicals               | NBP1-77080          | 1:500    |  | <a href="https://www.novusbio.com/products/nlrp3-nalp3-antibody_nbp1-77080">https://www.novusbio.com/products/nlrp3-nalp3-antibody_nbp1-77080</a>                                                                                                                                                                    |
| NLRP3 blocking peptide | Novus Biologicals               | NBP1-77080PEP       |          |  | <a href="https://www.novusbio.com/products/nlrp3-nalp3-protein_nbp1-77080pep">https://www.novusbio.com/products/nlrp3-nalp3-protein_nbp1-77080pep</a>                                                                                                                                                                |
| P2X7R                  | Santa Cruz                      | sc-15200            | 1:250    |  | <a href="https://www.scbt.com/p/p2x7-antibody-l-20">https://www.scbt.com/p/p2x7-antibody-l-20</a>                                                                                                                                                                                                                    |
| PLB (Total)            | Abcam                           | ab2865              | 1:2,000  |  | <a href="https://www.abcam.com/phospholamban-antibody-2d12-ab2865.html">https://www.abcam.com/phospholamban-antibody-2d12-ab2865.html</a>                                                                                                                                                                            |
| PLB (Ser16)            | Abcam                           | ab92697             | 1:1,000  |  | <a href="https://www.abcam.com/phospholamban-phospho-s16-antibody-epr1911-ab92697.html">https://www.abcam.com/phospholamban-phospho-s16-antibody-epr1911-ab92697.html</a>                                                                                                                                            |
| PLB (Thr17)            | Badrilla                        | A010-13             | 1:2,500  |  | <a href="https://badrilla.com/phospholamban-pln-plb-pthr17-pab-serum.html">https://badrilla.com/phospholamban-pln-plb-pthr17-pab-serum.html</a>                                                                                                                                                                      |
| RyR2 (Total)           | Thermo Fisher                   | MA3-916             | 1:1,000  |  | <a href="https://www.thermofisher.com/antibody/product/Ryanodine-Receptor-Antibody-clone-C3-33-Monoclonal/MA3-916">https://www.thermofisher.com/antibody/product/Ryanodine-Receptor-Antibody-clone-C3-33-Monoclonal/MA3-916</a>                                                                                      |
| RyR2 (Ser2808)         | Prof. X.H.T. Wehrens            | Custom              | 1:1,000  |  | <a href="https://www.bcm.edu/research/labs-and-centers/faculty-labs/xander-wehrens-lab">https://www.bcm.edu/research/labs-and-centers/faculty-labs/xander-wehrens-lab</a>                                                                                                                                            |
| RyR2 (Ser2814)         | Prof. X.H.T. Wehrens            | Custom              | 1:2,000  |  | <a href="https://www.bcm.edu/research/labs-and-centers/faculty-labs/xander-wehrens-lab">https://www.bcm.edu/research/labs-and-centers/faculty-labs/xander-wehrens-lab</a>                                                                                                                                            |

|                |                   |             |         |                                                                                                                                                                               |
|----------------|-------------------|-------------|---------|-------------------------------------------------------------------------------------------------------------------------------------------------------------------------------|
| SERCA2a        | Santa Cruz        | sc-8095     | 1:2,000 | <a href="https://www.scbt.com/p/serca2-antibody-n-19">https://www.scbt.com/p/serca2-antibody-n-19</a>                                                                         |
| TGF- $\beta$ 1 | Abcam             | ab9758      | 1:200   | <a href="https://www.abcam.com/tgf-beta-1-antibody-ab9758.html">https://www.abcam.com/tgf-beta-1-antibody-ab9758.html</a>                                                     |
| TLR4           | Novus Biologicals | NB100-56566 | 1:250   | <a href="https://www.novusbio.com/products/tlr4-antibody-76b3571_nb100-56566">https://www.novusbio.com/products/tlr4-antibody-76b3571_nb100-56566</a>                         |
| Troponin-C     | Fitzgerald        | 10R-T122a   | 1:500   | <a href="https://www.fitzgerald-fii.com/troponin-c-antibody-cardiac-10r-t122a.html">https://www.fitzgerald-fii.com/troponin-c-antibody-cardiac-10r-t122a.html</a>             |
| Troponin-I     | Cell Signaling    | 4002        | 1:500   | <a href="https://www.cellsignal.com/products/primary-antibodies/troponin-i-antibody/4002">https://www.cellsignal.com/products/primary-antibodies/troponin-i-antibody/4002</a> |
| Vimentin       | Santa Cruz        | sc-373717   | 1:1,000 | <a href="https://www.scbt.com/p/vimentin-antibody-e-5">https://www.scbt.com/p/vimentin-antibody-e-5</a>                                                                       |

### DNA/cDNA Clones

| Clone Name  | Sequence                     | Source / Repository | Persistent ID / URL                                                                                                                                                                                                                                                                                       |
|-------------|------------------------------|---------------------|-----------------------------------------------------------------------------------------------------------------------------------------------------------------------------------------------------------------------------------------------------------------------------------------------------------|
| GSDMD shRNA | <i>CCTAAGGCTGCAGGTAGAATC</i> | Vector Biolabs      | <a href="https://www.vectorbiolabs.com/product/shadv-260827-mouse-gsdmd-shrna-silencing-adenovirus/?azsid=bed6d1d1-3ded-4e26-afa8-5f0140f240e8&amp;i=1">https://www.vectorbiolabs.com/product/shadv-260827-mouse-gsdmd-shrna-silencing-adenovirus/?azsid=bed6d1d1-3ded-4e26-afa8-5f0140f240e8&amp;i=1</a> |

### Cultured Cells

| Name       | Vendor or Source         | Sex (F, M, or unknown) | Persistent ID / URL                                                                                                                                                                           |
|------------|--------------------------|------------------------|-----------------------------------------------------------------------------------------------------------------------------------------------------------------------------------------------|
| HL-1 cells | Merck Millipore (SCC065) | Unknown                | <a href="https://www.merckmillipore.com/NL/en/product/HL-1-Cardiac-Muscle-Cell-Line,MM_NF-SCC065">https://www.merckmillipore.com/NL/en/product/HL-1-Cardiac-Muscle-Cell-Line,MM_NF-SCC065</a> |

### Data & Code Availability

| Description                                   | Source / Repository | Persistent ID / URL                                                           |
|-----------------------------------------------|---------------------|-------------------------------------------------------------------------------|
| C++ code for human atrial cardiomyocyte model | GitHub              | <a href="https://github.com/jordiheijman">https://github.com/jordiheijman</a> |
| Full Western blots                            | Online Supplement   |                                                                               |

### Other

| Description                | Source / Repository                         | Persistent ID / URL |
|----------------------------|---------------------------------------------|---------------------|
| Human right-atrial samples | University Medical Center Essen, Germany    | #12-5268-BO         |
| Human right-atrial samples | University Medical Center Hamburg-Eppendorf | WF-088/18           |
| Human right-atrial samples | Dresden University of Technology            | EK114082002         |
