# Supplementary material
Source: PubMed Central journal article supplement (PMC7604886)
Supplement: NIHMS1617239-supplement-316710_Online.pdf [file NIHMS1617239-supplement-316710_Online.pdf]

## **Supplemental Material**

# **Atrial Myocyte NLRP3/CaMKII Nexus Forms a Substrate for Post-Operative Atrial Fibrillation**

Jordi Heijman, PhD<sup>#</sup>; Azinwi Phina Muna, PhD<sup>#</sup>; Tina Veleva, MD; Cristina E. Molina, PhD; Henry Sutanto, MD, MSc; Marcel Tekook, PhD; Qionglng Wang, PhD; Issam H. Abu-Taha, PhD; Marcel Gorka; Stephan Künzel, MD; Ali El-Armouche, MD; Hermann Reichenspurner, MD, PhD; Markus Kamler, MD; Viacheslav Nikolaev, PhD; Ursula Ravens, MD; Na Li, PhD; Stanley Nattel, MD; Xander H.T. Wehrens, MD, PhD; Dobromir Dobrev, MD

<sup>#</sup>These authors contributed equally

Corresponding Author:  
Dobromir Dobrev, MD  
Hufelandstr. 55, 45122 Essen, Germany  
Phone: +49 201 723 3477, Fax: +49 201 723 5593  
E-Mail: [dobromir.dobrev@uk-essen.de](mailto:dobromir.dobrev@uk-essen.de).

## Contents

|                                                                            |    |
|----------------------------------------------------------------------------|----|
| Contents                                                                   | 2  |
| Patient Characteristics                                                    | 3  |
| Experimental Methods                                                       | 12 |
| Sharp-electrode AP-recordings                                              | 12 |
| Perforated patch-clamp experiments                                         | 12 |
| Ruptured patch-clamp experiments with simultaneous $[Ca^{2+}]_i$ recording | 13 |
| Preparation of cardiomyocyte-enriched fractions                            | 14 |
| Western blot analyses                                                      | 14 |
| RyR2 single-channel recordings                                             | 15 |
| Computational Modeling                                                     | 17 |
| Baseline (Ctl) model                                                       | 17 |
| POAF model variant                                                         | 17 |
| Simulating experimental protocols                                          | 18 |
| Supplemental Analyses                                                      | 20 |
| Supplemental Figures                                                       | 26 |

## Patient Characteristics

Right-atrial (RA) appendages were obtained from patients without a history of atrial fibrillation (AF) undergoing open heart surgery and were subsequently divided into a control group that did not develop post-operative AF (Ctl) and a group that developed post-operative AF (POAF). An overview of the clinical characteristics of all patients included in this study is provided in [Online Table I](#). Clinical characteristics of the subsets of patients whose samples were used for cell isolation and patch-clamp recording, multicellular action potential (AP) recordings, or biochemical experiments are given in [Online Tables II, III and IV](#), respectively. Samples from 2 Ctl patients and 3 POAF patients were employed for both cell isolation and biochemical experiments and are therefore included in both [Online Table II and IV](#). Experimental protocols were approved by ethical review boards of University Hospital Essen (#12-5268-BO), University Medical Center Hamburg-Eppendorf (WF-088/18), and Dresden University of Technology (No: EK114082002) were conducted in accordance with the Declaration of Helsinki. Each patient gave written informed consent.

C-reactive protein (CRP) levels were determined as part of the routine clinical care at the central diagnostic laboratory of MVZLM Ruhr using Cobas C702, C-reactive Protein Generation 3 (Roche Diagnostics, Germany) from patient serum. The frequency and timing of CRP measurements was not standardized, but for patients included in the analysis, values were always available just prior to the surgery, on  $2.1 \pm 0.9$  out of the first 3 postoperative days, and on  $3.3 \pm 1.4$  days in the first week post-surgery.

**Online Table I. Clinical characteristics of all patient samples employed in this study.**

|                                   | Ctl (n=166)   |     | POAF (n=99)   |    | P-value      |
|-----------------------------------|---------------|-----|---------------|----|--------------|
|                                   | Value         | N   | Value         | N  |              |
| <b>Demographics</b>               |               |     |               |    |              |
| Age (years)                       | 68 (57-75)    | 166 | 71 (62-78)    | 99 | <b>0.036</b> |
| Female gender                     | 53 (31.9%)    | 166 | 39 (39.4%)    | 99 | 0.217        |
| BMI (kg / m <sup>2</sup> )        | 27 (25-30)    | 140 | 27 (24-31)    | 87 | 0.994        |
| <b>Indication for surgery</b>     |               |     |               |    |              |
| CAD                               | 64 (38.6%),   | 166 | 30 (30.3%),   | 99 | 0.370        |
| AVD/MVD                           | 72 (43.4%),   |     | 47 (47.5%),   |    |              |
| CAD+AVD/MVD                       | 26 (15.7%),   |     | 21 (21.2%),   |    |              |
| Other                             | 4 (2.4%)      |     | 1 (1.0%)      |    |              |
| <b>Medical history</b>            |               |     |               |    |              |
| Atrial fibrillation               | 0 (0.0%)      | 166 | 0 (0.0%)      | 99 | >0.999       |
| CKD                               | 15 (13.3%)    | 113 | 16 (20.8%)    | 77 | 0.169        |
| COPD                              | 28 (19.7%)    | 142 | 16 (18.0%)    | 89 | 0.743        |
| Dyslipidemia                      | 78 (53.4%)    | 146 | 42 (47.7%)    | 88 | 0.398        |
| Diabetes                          | 49 (30.8%)    | 159 | 28 (29.2%)    | 96 | 0.781        |
| Heart failure (NYHA)              |               |     |               |    |              |
| <II                               | 53 (36.8%)    | 144 | 29 (31.9%)    | 91 | 0.244        |
| II                                | 30 (20.8%)    |     | 12 (13.2%)    |    |              |
| III                               | 50 (34.7%)    |     | 42 (46.2%)    |    |              |
| IV                                | 11 (7.6%)     |     | 8 (8.8%)      |    |              |
| Hypertension                      | 117 (73.1%)   | 160 | 73 (76.0%)    | 96 | 0.606        |
| Pulmonary hypertension            | 18 (15.7%)    | 115 | 13 (17.6%)    | 74 | 0.729        |
| Sleep apnea                       | 7 (5.2%)      | 134 | 2 (2.4%)      | 82 | 0.320        |
| <b>Lab</b>                        |               |     |               |    |              |
| eGFR (ml/min/1.73m <sup>2</sup> ) | 74.0±20.2     | 147 | 67.9±21.1     | 91 | <b>0.029</b> |
| Preoperative CRP (mg/dL)          | 0.3 (0.1-0.9) | 76  | 0.4 (0.1-0.7) | 50 | 0.629        |
| Max postoperative CRP (mg/dL)     | 15.5±6.73     | 75  | 15.4±4.81     | 50 | 0.944        |
| <b>ECG</b>                        |               |     |               |    |              |
| RR (ms)                           | 877 (786-971) | 148 | 856 (751-944) | 91 | 0.137        |
| P-wave duration (ms)              | 94 (70-108)   | 113 | 97 (75-114)   | 66 | 0.360        |
| PQ (ms)                           | 160 (142-178) | 113 | 164 (142-192) | 68 | 0.199        |
| QRS (ms)                          | 92 (84-104)   | 114 | 90 (84-110)   | 75 | 0.859        |
| QTc (ms)                          | 432 (415-454) | 148 | 437 (419-468) | 91 | 0.156        |
| <b>Echocardiography</b>           |               |     |               |    |              |
| LA diameter (mm)                  | 41.2±6.25     | 119 | 41.2±5.83     | 82 | 0.938        |
| LVEF (%)                          | 60 (52-65)    | 153 | 60 (50-65)    | 91 | 0.269        |
| Aortic valve insufficiency        |               |     |               |    |              |
| None                              | 66 (49.6%)    | 133 | 41 (50.0%)    | 82 | 0.986        |
| Mild                              | 47 (35.5%)    |     | 29 (35.4%)    |    |              |
| Moderate                          | 19 (14.3%)    |     | 11 (13.4%)    |    |              |
| Severe                            | 1 (0.8%)      |     | 1 (1.2%)      |    |              |
| Mitral valve insufficiency        |               |     |               |    |              |
| None                              | 56 (41.5%)    | 135 | 26 (32.1%)    | 81 | 0.080        |
| Mild                              | 61 (45.2%)    |     | 34 (42.0%)    |    |              |
| Moderate                          | 12 (8.9%)     |     | 13 (16.0%)    |    |              |
| Severe                            | 6 (4.4%)      |     | 9 (11.1%)     |    |              |
| Tricuspid valve insufficiency     |               |     |               |    |              |
| None                              | 96 (71.1%)    | 135 | 52 (63.4%)    | 82 | 0.161        |
| Mild                              | 35 (25.9%)    |     | 23 (28.0%)    |    |              |
| Moderate                          | 4 (3.0%)      |     | 7 (8.5%)      |    |              |
| Severe                            | 0 (0.0%)      |     | 0 (0.0%)      |    |              |

| Medication             |             |     |            |    |       |
|------------------------|-------------|-----|------------|----|-------|
| ACE inhibitors or ARBs | 102 (61.4%) | 166 | 60 (60.6%) | 99 | 0.892 |
| Beta-blockers          | 100 (60.2%) | 166 | 52 (52.5%) | 99 | 0.219 |
| Digitalis              | 4 (2.4%)    | 166 | 6 (6.1%)   | 99 | 0.131 |
| Dihydropyridines       | 19 (11.4%)  | 166 | 19 (19.2%) | 99 | 0.082 |
| Diuretics              | 57 (34.3%)  | 166 | 44 (44.4%) | 99 | 0.101 |
| Lipid-lowering drugs   | 100 (60.2%) | 166 | 49 (49.5%) | 99 | 0.088 |
| Nitrates               | 15 (9.0%)   | 166 | 13 (13.1%) | 99 | 0.294 |

5 Continuous variables are presented as mean±SD for normal-distributed data or median and interquartile ranges. Categorical data are given as number of patients (%). Normal-distributed continuous data were compared using unpaired Student's *t*-test, non-normal-distributed continuous data using Mann-Whitney test, and categorical data using Chi-squared tests. Abbreviations: ACE, angiotensin-converting enzyme; ARB, angiotensin receptor blocker; AVD/MVD, aortic/mitral valve disease; BMI, body mass index; CAD, coronary artery disease; CKD, chronic kidney disease; COPD, chronic obstructive pulmonary disease; CRP, C-reactive protein; Dihydropyridines, dihydropyridine-type Ca<sup>2+</sup>-channel blockers; ECG, electrocardiogram; eGFR, estimated glomerular filtration rate; LA, left atrium; LVEF, left ventricular ejection fraction; NYHA, New York Heart Association. N-numbers represent number of patients for which information on the corresponding clinical variable was available.

10

15 **Online Table II. Clinical characteristics of patient samples employed for simultaneous patch-clamp/ $Ca^{2+}$ -imaging or perforated patch-clamp recordings in isolated atrial cardiomyocytes.**

|                                   | Ctl (n=75)    |    | POAF (n=44)   |    | P-value      |
|-----------------------------------|---------------|----|---------------|----|--------------|
|                                   | Value         | N  | Value         | N  | Value        |
| <b>Demographics</b>               |               |    |               |    |              |
| Age (years)                       | 70 (56-75)    | 75 | 73 (62-78)    | 44 | <b>0.040</b> |
| Female (%)                        | 21 (28.0%)    | 75 | 21 (47.7%)    | 44 | <b>0.030</b> |
| BMI (kg / m <sup>2</sup> )        | 28 (26-31)    | 50 | 27 (24-30)    | 32 | 0.177        |
| <b>Indication for surgery</b>     |               |    |               |    |              |
| CAD                               | 24 (32.0%)    | 75 | 9 (20.5%)     | 44 | 0.342        |
| AVD/MVD                           | 34 (45.3%)    |    | 25 (56.8%)    |    |              |
| CAD+AVD/MVD                       | 15 (20.0%)    |    | 10 (22.7%)    |    |              |
| Other                             | 2 (2.7%)      |    | 0 (0.0%)      |    |              |
| <b>Medical history</b>            |               |    |               |    |              |
| Atrial fibrillation               | 0 (0.0%)      | 75 | 0 (0.0%)      | 44 | >0.999       |
| CKD                               | 4 (6.9%)      | 58 | 4 (10.5%)     | 38 | 0.529        |
| COPD                              | 6 (11.3%)     | 53 | 7 (19.4%)     | 36 | 0.287        |
| Dyslipidemia                      | 26 (47.3%)    | 55 | 17 (51.5%)    | 33 | 0.700        |
| Diabetes                          | 17 (25.0%)    | 68 | 10 (24.4%)    | 41 | 0.943        |
| Heart failure (NYHA)              |               | 54 |               | 36 | 0.555        |
| <II                               | 19 (35.2%)    |    | 10 (27.8%)    |    |              |
| II                                | 13 (24.1%)    |    | 6 (16.7%)     |    |              |
| III                               | 19 (35.2%)    |    | 18 (50.0%)    |    |              |
| IV                                | 3 (5.6%)      |    | 2 (5.6%)      |    |              |
| Hypertension                      | 40 (58.0%)    | 69 | 29 (70.7%)    | 41 | 0.181        |
| Pulmonary hypertension            | 3 (7.1%)      | 42 | 6 (21.4%)     | 28 | 0.080        |
| Sleep apnea                       | 3 (6.7%)      | 45 | 1 (3.7%)      | 27 | 0.595        |
| <b>Lab</b>                        |               |    |               |    |              |
| eGFR (ml/min/1.73m <sup>2</sup> ) | 72.1±22.9     | 58 | 69.8±20.3     | 37 | 0.625        |
| Preoperative CRP (mg/dL)          | 0.3 (0.1-0.8) | 45 | 0.2 (0.1-0.5) | 27 | 0.758        |
| Max postoperative CRP (mg/dL)     | 16.0±6.73     | 45 | 15.4±4.21     | 27 | 0.669        |
| <b>ECG</b>                        |               |    |               |    |              |
| RR (ms)                           | 891 (814-969) | 58 | 842 (747-926) | 36 | 0.053        |
| P-wave duration (ms)              | 85.5±25.5     | 57 | 86.7±26.9     | 32 | 0.849        |
| PQ (ms)                           | 158 (138-174) | 57 | 163 (142-188) | 32 | 0.363        |
| QRS (ms)                          | 90 (80-102)   | 58 | 89 (80-105)   | 36 | 0.852        |
| QTc (ms)                          | 426 (402-447) | 58 | 438 (423-454) | 36 | <b>0.019</b> |
| <b>Echocardiography</b>           |               |    |               |    |              |
| LA diameter (mm)                  | 40.0±6.51     | 59 | 40.8±5.83     | 38 | 0.511        |
| LVEF (%)                          | 60 (55-65)    | 65 | 60 (53-65)    | 38 | 0.687        |
| Aortic valve insufficiency        |               | 44 |               | 27 | 0.651        |
| None                              | 14 (31.8%)    |    | 12 (44.4%)    |    |              |
| Mild                              | 21 (47.7%)    |    | 11 (40.7%)    |    |              |
| Moderate                          | 8 (18.2%)     |    | 4 (14.8%)     |    |              |
| Severe                            | 1 (2.3%)      |    | 0 (0.0%)      |    |              |
| Mitral valve insufficiency        |               | 45 |               | 26 | <b>0.038</b> |
| None                              | 18 (40.0%)    |    | 5 (19.2%)     |    |              |
| Mild                              | 24 (53.3%)    |    | 13 (50.0%)    |    |              |
| Moderate                          | 2 (4.4%)      |    | 5 (19.2%)     |    |              |
| Severe                            | 1 (2.2%)      |    | 3 (11.5%)     |    |              |

|                               |            |    |            |    |        |
|-------------------------------|------------|----|------------|----|--------|
| Tricuspid valve insufficiency |            |    |            |    |        |
| None                          | 30 (66.7%) | 45 | 15 (55.6%) | 27 | 0.632  |
| Mild                          | 14 (31.1%) |    | 11 (40.7%) |    |        |
| Moderate                      | 1 (2.2%)   |    | 1 (3.7%)   |    |        |
| Severe                        | 0 (0.0%)   |    | 0 (0.0%)   |    |        |
| <b>Medication</b>             |            |    |            |    |        |
| ACE inhibitors or ARBs        | 38 (50.7%) | 75 | 24 (54.5%) | 44 | 0.683  |
| Beta-blockers                 | 31 (41.3%) | 75 | 19 (43.2%) | 44 | 0.844  |
| Digitalis                     | 0 (0.0%)   | 75 | 0 (0.0%)   | 44 | >0.999 |
| Dihydropyridines              | 8 (10.7%)  | 75 | 3 (6.8%)   | 44 | 0.484  |
| Diuretics                     | 23 (30.7%) | 75 | 18 (40.9%) | 44 | 0.256  |
| Lipid-lowering drugs          | 38 (50.7%) | 75 | 21 (47.7%) | 44 | 0.757  |
| Nitrates                      | 6 (8.0%)   | 75 | 3 (6.8%)   | 44 | 0.814  |

20 Continuous variables are presented as mean±SD for normal-distributed data or median and interquartile ranges. Categorical data are given as number of patients (%). Normal-distributed continuous data were compared using unpaired Student's *t*-test, non-normal-distributed continuous data using Mann-Whitney test, and categorical data using Chi-squared tests. Abbreviations: ACE, angiotensin-converting enzyme; ARB, angiotensin receptor blocker; AVD/MVD, aortic/mitral valve disease; BMI, body mass index; CAD, coronary artery disease; CKD, chronic kidney disease; COPD, chronic obstructive pulmonary disease; CRP, C-reactive protein; Dihydropyridines, dihydropyridine-type Ca<sup>2+</sup>-channel blockers; ECG, electrocardiogram; eGFR, estimated glomerular filtration rate; LA, left atrium; LVEF, left ventricular ejection fraction; NYHA, New York Heart Association. N-numbers represent number of patients for which information on the corresponding clinical variable was available.

25

30

**Online Table III. Clinical characteristics of patient samples employed for multicellular action potential recordings.**

|                                   | Ctl (n=34) |    | POAF (n=16) |    | P-value |
|-----------------------------------|------------|----|-------------|----|---------|
|                                   | Value      | N  | Value       | N  |         |
| <b>Demographics</b>               |            |    |             |    |         |
| Age (years)                       | 69.3±9.81  | 34 | 71.1±7.89   | 16 | 0.518   |
| Female gender                     | 13 (38.2%) | 34 | 6 (37.5%)   | 16 | 0.960   |
| BMI (kg / m <sup>2</sup> )        | 27.1±3.30  | 34 | 28.1±3.92   | 16 | 0.378   |
| <b>Indication for surgery</b>     |            |    |             |    |         |
| CAD                               | 23 (67.6%) | 34 | 7 (43.8%)   | 16 | 0.264   |
| AVD/MVD                           | 8 (23.5%)  |    | 7 (43.8%)   |    |         |
| CAD+AVD/MVD                       | 3 (8.8%)   |    | 2 (12.5%)   |    |         |
| Other                             | 0 (0.0%)   |    | 0 (0.0%)    |    |         |
| <b>Medical history</b>            |            |    |             |    |         |
| Atrial fibrillation               | 0 (0.0%)   | 34 | 0 (0.0%)    | 16 | >0.999  |
| CKD                               |            | 0  |             | 0  |         |
| COPD                              | 13 (38.2%) | 34 | 4 (25.0%)   | 16 | 0.357   |
| Dyslipidemia                      | 23 (67.6%) | 34 | 10 (62.5%)  | 16 | 0.720   |
| Diabetes                          | 10 (29.4%) | 34 | 4 (25.0%)   | 16 | 0.746   |
| Heart failure (NYHA)              |            | 34 |             | 16 | 0.814   |
| <II                               | 11 (32.4%) |    | 4 (25.0%)   |    |         |
| II                                | 0 (0.0%)   |    | 0 (0.0%)    |    |         |
| III                               | 18 (52.9%) |    | 10 (62.5%)  |    |         |
| IV                                | 5 (14.7%)  |    | 2 (12.5%)   |    |         |
| Hypertension                      | 32 (94.1%) | 34 | 15 (93.8%)  | 16 | 0.959   |
| Pulmonary hypertension            | 9 (26.5%)  | 34 | 2 (12.5%)   | 16 | 0.266   |
| Sleep apnea                       | 2 (5.9%)   | 34 | 0 (0.0%)    | 16 | 0.322   |
| <b>Lab</b>                        |            |    |             |    |         |
| eGFR (ml/min/1.73m <sup>2</sup> ) | 80 (72-89) | 33 | 80 (67-87)  | 16 | 0.773   |
| Preoperative CRP (mg/dL)          |            | 0  |             | 0  |         |
| Max postoperative CRP (mg/dL)     |            | 0  |             | 0  |         |
| <b>ECG</b>                        |            |    |             |    |         |
| RR (ms)                           | 959±165    | 34 | 945±156     | 16 | 0.782   |
| P-wave duration (ms)              |            | 0  |             | 0  |         |
| PQ (ms)                           |            | 0  |             | 0  |         |
| QRS (ms)                          |            | 0  |             | 0  |         |
| QTc (ms)                          | 427±24.9   | 34 | 425±34.5    | 16 | 0.746   |
| <b>Echocardiography</b>           |            |    |             |    |         |
| LA diameter (mm)                  | 43.2±5.68  | 27 | 41.7±5.97   | 14 | 0.456   |
| LVEF (%)                          | 56.5±11.5  | 34 | 53.9±15.5   | 16 | 0.513   |
| Aortic valve insufficiency        |            | 34 |             | 16 | 0.470   |
| None                              | 17 (50.0%) |    | 9 (56.2%)   |    |         |
| Mild                              | 14 (41.2%) |    | 7 (43.8%)   |    |         |
| Moderate                          | 3 (8.8%)   |    | 0 (0.0%)    |    |         |
| Severe                            | 0 (0.0%)   |    | 0 (0.0%)    |    |         |
| Mitral valve insufficiency        |            | 34 |             | 16 | 0.999   |
| None                              | 10 (29.4%) |    | 5 (31.3%)   |    |         |
| Mild                              | 17 (50.0%) |    | 8 (50.0%)   |    |         |
| Moderate                          | 5 (14.7%)  |    | 2 (12.5%)   |    |         |
| Severe                            | 2 (5.9%)   |    | 1 (6.3%)    |    |         |



|                               |            |    |            |    |       |
|-------------------------------|------------|----|------------|----|-------|
| Tricuspid valve insufficiency |            |    |            |    |       |
| None                          | 27 (79.4%) | 34 | 12 (75.0%) | 16 | 0.719 |
| Mild                          | 5 (14.7%)  |    | 2 (12.5%)  |    |       |
| Moderate                      | 2 (5.9%)   |    | 2 (12.5%)  |    |       |
| Severe                        | 0 (0.0%)   |    | 0 (0.0%)   |    |       |
| <b>Medication</b>             |            |    |            |    |       |
| ACE inhibitors or ARBs        | 30 (88.2%) | 34 | 12 (75.0%) | 16 | 0.234 |
| Beta-blockers                 | 29 (85.3%) | 34 | 13 (81.3%) | 16 | 0.716 |
| Digitalis                     | 1 (2.9%)   | 34 | 1 (6.3%)   | 16 | 0.578 |
| Dihydropyridines              | 4 (11.8%)  | 34 | 3 (18.8%)  | 16 | 0.507 |
| Diuretics                     | 15 (44.1%) | 34 | 8 (50.0%)  | 16 | 0.697 |
| Lipid-lowering drugs          | 30 (88.2%) | 34 | 11 (68.8%) | 16 | 0.094 |
| Nitrates                      | 5 (14.7%)  | 34 | 2 (12.5%)  | 16 | 0.834 |

35 Continuous variables are presented as mean±SD for normal-distributed data or median and interquartile ranges. Categorical data are given as number of patients (%). Normal-distributed continuous data were compared using unpaired Student's *t*-test, non-normal-distributed continuous data using Mann-Whitney test, and categorical data using Chi-squared tests. Abbreviations: ACE, angiotensin-converting enzyme; ARB, angiotensin receptor blocker; AVD/MVD, aortic/mitral valve disease; BMI, body mass index; CAD, coronary artery disease; CKD, chronic kidney disease; COPD, chronic obstructive pulmonary disease; CRP, C-reactive protein; Dihydropyridines, dihydropyridine-type Ca<sup>2+</sup>-channel blockers; ECG, electrocardiogram; eGFR, estimated glomerular filtration rate; LA, left atrium; LVEF, left ventricular ejection fraction; NYHA, New York Heart Association. N-numbers represent number of patients for which information on the corresponding clinical variable was available.

40

45

**Online Table IV. Clinical characteristics of patient samples employed for biochemical experiments.**

|                                   | Ctl (n=59)    |    | POAF (n=42)   |    | P-value      |
|-----------------------------------|---------------|----|---------------|----|--------------|
|                                   | Value         | N  | Value         | N  | Value        |
| <b>Demographics</b>               |               |    |               |    |              |
| Age (years)                       | 66 (56-75)    | 59 | 69 (61-77)    | 42 | 0.109        |
| Female (%)                        | 19 (32.2%)    | 59 | 14 (33.3%)    | 42 | 0.905        |
| BMI (kg / m <sup>2</sup> )        | 26 (24-30)    | 59 | 27 (22-31)    | 42 | 0.929        |
| <b>Indication for surgery</b>     |               |    |               |    |              |
| CAD                               | 17 (28.8%)    | 59 | 14 (33.3%)    | 42 | 0.449        |
| AVD/MVD                           | 32 (54.2%)    |    | 17 (40.5%)    |    |              |
| CAD+AVD/MVD                       | 8 (13.6%)     |    | 10 (23.8%)    |    |              |
| Other                             | 2 (3.4%)      |    | 1 (2.4%)      |    |              |
| <b>Medical history</b>            |               |    |               |    |              |
| Atrial fibrillation               | 0 (0.0%)      | 59 | 0 (0.0%)      | 42 | >0.999       |
| CKD                               | 11 (19.0%)    | 58 | 12 (28.6%)    | 42 | 0.260        |
| COPD                              | 9 (15.5%)     | 58 | 5 (12.5%)     | 40 | 0.675        |
| Dyslipidemia                      | 32 (54.2%)    | 59 | 15 (35.7%)    | 42 | 0.066        |
| Diabetes                          | 22 (37.3%)    | 59 | 14 (33.3%)    | 42 | 0.683        |
| Heart failure (NYHA)              |               | 59 |               | 42 | 0.239        |
| <II                               | 25 (42.4%)    |    | 17 (40.5%)    |    |              |
| II                                | 17 (28.8%)    |    | 6 (14.3%)     |    |              |
| III                               | 14 (23.7%)    |    | 15 (35.7%)    |    |              |
| IV                                | 3 (5.1%)      |    | 4 (9.5%)      |    |              |
| Hypertension                      | 47 (79.7%)    | 59 | 31 (73.8%)    | 42 | 0.489        |
| Pulmonary hypertension            | 6 (14.6%)     | 41 | 5 (15.2%)     | 33 | 0.950        |
| Sleep apnea                       | 2 (3.4%)      | 58 | 2 (4.8%)      | 42 | 0.741        |
| <b>Lab</b>                        |               |    |               |    |              |
| eGFR (ml/min/1.73m <sup>2</sup> ) | 72.0±18.6     | 59 | 61.9±19.8     | 41 | <b>0.012</b> |
| Preoperative CRP (mg/dL)          | 0.3 (0.1-0.9) | 34 | 0.4 (0.1-1.0) | 26 | 0.638        |
| Max postoperative CRP (mg/dL)     | 14.8±6.42     | 33 | 14.8±5.48     | 26 | 0.985        |
| <b>ECG</b>                        |               |    |               |    |              |
| RR (ms)                           | 815±161       | 59 | 813±124       | 42 | 0.953        |
| P-wave duration (ms)              | 94.9±24.0     | 59 | 98.1±27.3     | 37 | 0.551        |
| PQ (ms)                           | 164 (147-180) | 59 | 164 (146-210) | 39 | 0.500        |
| QRS (ms)                          | 96 (86-106)   | 59 | 91 (84-117)   | 42 | 0.639        |
| QTc (ms)                          | 442 (425-470) | 59 | 442 (422-471) | 42 | 0.807        |
| <b>Echocardiography</b>           |               |    |               |    |              |
| LA diameter (mm)                  | 41.8±5.74     | 34 | 41.2±5.63     | 33 | 0.945        |
| LVEF (%)                          | 60 (50-65)    | 55 | 55 (43-64)    | 39 | 0.250        |
| Aortic valve insufficiency        |               | 58 |               | 42 | 0.593        |
| None                              | 36 (62.1%)    |    | 22 (52.4%)    |    |              |
| Mild                              | 13 (22.4%)    |    | 12 (28.6%)    |    |              |
| Moderate                          | 9 (15.5%)     |    | 7 (16.7%)     |    |              |
| Severe                            | 0 (0.0%)      |    | 1 (2.4%)      |    |              |
| Mitral valve insufficiency        |               | 59 |               | 42 | 0.193        |
| None                              | 29 (49.2%)    |    | 15 (35.7%)    |    |              |
| Mild                              | 21 (35.6%)    |    | 14 (33.3%)    |    |              |
| Moderate                          | 6 (10.2%)     |    | 6 (14.3%)     |    |              |
| Severe                            | 3 (5.1%)      |    | 7 (16.7%)     |    |              |

|                               |            |    |            |    |              |
|-------------------------------|------------|----|------------|----|--------------|
| Tricuspid valve insufficiency |            |    |            |    |              |
| None                          | 41 (69.5%) |    | 26 (61.9%) |    |              |
| Mild                          | 17 (28.8%) | 59 | 12 (28.6%) | 42 | 0.197        |
| Moderate                      | 1 (1.7%)   |    | 4 (9.5%)   |    |              |
| Severe                        | 0 (0.0%)   |    | 0 (0.0%)   |    |              |
|                               |            |    |            |    |              |
| <b>Medication</b>             |            |    |            |    |              |
| ACE inhibitors or ARBs        | 34 (57.6%) | 59 | 25 (59.5%) | 42 | 0.849        |
| Beta-blockers                 | 43 (72.9%) | 59 | 21 (50.0%) | 42 | <b>0.019</b> |
| Digitalis                     | 3 (5.1%)   | 59 | 5 (11.9%)  | 42 | 0.211        |
| Dihydropyridines              | 8 (13.6%)  | 59 | 13 (31.0%) | 42 | <b>0.034</b> |
| Diuretics                     | 21 (35.6%) | 59 | 20 (47.6%) | 42 | 0.225        |
| Lipid-lowering drugs          | 34 (57.6%) | 59 | 17 (40.5%) | 42 | 0.089        |
| Nitrates                      | 3 (5.1%)   | 59 | 8 (19.0%)  | 42 | <b>0.026</b> |

50 Continuous variables are presented as mean±SD for normal-distributed data or median and interquartile ranges. Categorical data are given as number of patients (%). Normal-distributed continuous data were compared using unpaired Student's *t*-test, non-normal-distributed continuous data using Mann-Whitney test, and categorical data using Chi-squared tests. Abbreviations: ACE, angiotensin-converting enzyme; ARB, angiotensin receptor blocker; AVD/MVD, aortic/mitral valve disease; BMI, body mass index; CAD, coronary artery disease; CKD, chronic kidney disease; COPD, chronic obstructive pulmonary disease; CRP, C-reactive protein; Dihydropyridines, dihydropyridine-type Ca<sup>2+</sup>-channel blockers; ECG, electrocardiogram; eGFR, estimated glomerular filtration rate; LA, left atrium; LVEF, left ventricular ejection fraction; NYHA, New York Heart Association. N-numbers represent number of patients for which information on the corresponding clinical variable was available.

55

## 60 **Experimental Methods**

### ***Sharp-electrode AP-recordings***

Free-running atrial trabeculae (<1 mm in diameter and 2–5 mm in length) were dissected from RA appendages and mounted on the bottom of a 5-mL organ bath perfused with 50-mL of recirculating, oxygenized Tyrode's solution (flow rate 7 mL/min, temperature  $36\pm 1^\circ\text{C}$ ). The bath solution contained (in mmol/L): NaCl 127, KCl 4.5, MgCl<sub>2</sub> 1.5, CaCl<sub>2</sub> 1.8, glucose 10, NaHCO<sub>3</sub> 22, and NaH<sub>2</sub>PO<sub>4</sub> 0.42 and was equilibrated with 5% CO<sub>2</sub> in O<sub>2</sub> (pH=7.4). APs were recorded as previously described.<sup>21,60</sup> Preparations were electrically stimulated at a basal rate of 1-Hz with isolated square-wave stimuli of 1-ms duration, 2 times threshold intensity. After a 60-min equilibration period, transmembrane potentials were recorded with glass microelectrodes filled with 2.5 M KCl. Tip resistances of the electrodes were between 20 and 80 MΩ. Both timing of the driving stimuli and pre-processing of the transmembrane potential responses were carried out with dedicated software for AP recordings, as previously described.<sup>60</sup>

### 75 ***Perforated patch-clamp experiments***

Total membrane current was measured in atrial cardiomyocytes at room temperature using the whole-cell perforated-patch configuration with an EPC-10 amplifier (HEKA Elektronik, Germany), as previously described.<sup>22,61</sup> Membrane capacitance was  $61.4\pm 24.8$  pF in Ctl (n=37/30) vs.  $56.0\pm 21.8$  pF in POAF (n=27/17; P=0.403) and currents were corrected for membrane capacitance. The extracellular solution contained (in mmol/L): NaCl 127, TEA 5, HEPES 10, NaHCO<sub>3</sub> 4, NaH<sub>2</sub>PO<sub>4</sub> 0.33, glucose 10, pyruvic acid 5, CaCl<sub>2</sub> 2, MgCl<sub>2</sub> 1.8 (pH=7.4) and the pipette solution contained (in mmol/L): aspartic acid 109, CsCl 47, Mg<sub>2</sub>ATP 3, MgCl<sub>2</sub> 1, Na<sub>2</sub>-phosphocreatine 5, Li<sub>2</sub>GTP 0.42, HEPES 10 (pH=7.2 with CsOH). Amphotericin-B (250-mg/mL) was added to the pipette solution before starting an experiment. All chemicals were acquired from Sigma-Aldrich. The pipette resistance was 2-5 MΩ.

L-type Ca<sup>2+</sup>-current (I<sub>Ca,L</sub>) was measured during a 200-ms depolarizing pulse to 0 mV following a prepulse from -80 to -45 mV to inactivate the Na<sup>+</sup>-current at 0.5-Hz. I<sub>Ca,L</sub> amplitude was determined as the difference between the peak inward current and the current at the end of the depolarization step. The time constants of I<sub>Ca,L</sub> inactivation were determined from a bi-exponential fit of the decaying phase of I<sub>Ca,L</sub>. The I<sub>Ca,L</sub> voltage dependence was determined using test potentials between -40 and +50 mV and voltage dependence of inactivation was assessed using 300-ms inactivating pulses to potentials from -50 to 0 mV followed by a test pulse to 0 mV. Subsequently, the mid-point (V<sub>mid</sub>) of inactivation was determined by fitting a Boltzmann curve [ $I = 1 / (1 + \exp((V - V_{\text{mid}})/k))$ ] to the I<sub>Ca,L</sub> amplitude vs. inactivating potential curve. Recovery of I<sub>Ca,L</sub> from inactivation was assessed using a two-pulse protocol with increasing intervals at -80 mV between the first and the second pulse used to elicit I<sub>Ca,L</sub> and was quantified using a mono-exponential fit of the individual recovery curves.

Sarcoplasmic reticulum (SR) Ca<sup>2+</sup>-content was measured as the integrated Na<sup>+</sup>/Ca<sup>2+</sup>-exchanger (NCX)-mediated current (I<sub>NCX</sub>) during caffeine application (10-mmol/L) to empty the SR and spontaneous SR Ca<sup>2+</sup>-release events (SCaEs) were quantified as the frequency of transient-inward I<sub>NCX</sub> at holding potentials of -50 and -80 mV.<sup>22,12</sup>

**Ruptured patch-clamp experiments with simultaneous  $[Ca^{2+}]_i$  recording**

Intracellular  $[Ca^{2+}]_i$  was quantified at 37°C using Fluo-3-acetoxymethyl ester (Fluo-3 AM, Invitrogen, Carlsbad, CA) in both bath and pipette solutions, as previously described.<sup>6,7</sup> After 10-min loading with 10- $\mu$ mol/L Fluo-3 and 30 min de-esterification, fluorescence was excited at 488 nm and emitted light (>520 nm) was recorded. Fluorescence intensity was converted to  $[Ca^{2+}]_i$  using  $[Ca^{2+}]_i = k_d * F / (F_{max} - F)$ , where  $k_d$  is the dissociation constant of Fluo-3 (864-nmol/L),  $F$  is baseline-corrected Fluo-3 fluorescence, and  $F_{max}$  is baseline-corrected,  $Ca^{2+}$ -saturated fluorescence obtained at the end of each experiment.<sup>10,11</sup> In a subset of experiments, results were presented as relative fluorescence changes ( $F/F_0$ ) obtained at room temperature. Simultaneously, membrane currents were recorded in whole-cell ruptured-patch configuration under voltage-clamp conditions. Membrane capacitance was 79.4 (56.9-125.9) pF in Ctl (n=78/42) vs. 101.8 (64.9-134.0) pF in POAF (n=46/25;  $P=0.387$ ) and currents were corrected for membrane capacitance (expressed as pA/pF). Borosilicate glass microelectrodes had tip resistances of 2-5 M $\Omega$  when filled with pipette solution, containing (in mmol/L): EGTA 0.02, Fluo-3 0.1, GTP-Tris 0.1, HEPES 10, K-aspartate 92, KCl 48, Mg-ATP 1, Na<sub>2</sub>-ATP 4 (pH=7.2). Seal-resistances were 4-8 G $\Omega$ . Series resistance and cell capacitance were compensated. During experiments, myocytes were superfused with a bath solution containing (in mmol/L): CaCl<sub>2</sub> 2, glucose 10, HEPES 10, KCl 4, MgCl<sub>2</sub> 1, NaCl 140, probenecid 2 (pH=7.4). K<sup>+</sup>-currents were blocked with 4-aminopyridine (5-mmol/L) and BaCl<sub>2</sub> (0.1-mmol/L). Drugs were applied via a rapid solution exchange system (ALA Scientific Instruments, Long Island, NY). pClamp-Software (V10.2, Molecular Devices, Sunnyvale, CA) was used for data acquisition and analysis.

$I_{Ca,L}$  and corresponding  $Ca^{2+}$  transients (CaT) were activated using consecutive 100-ms depolarizing steps to +10 mV, preceded by a 100-ms ramp-pulse from a holding potential of -80 mV to -40 mV to inactivate Na<sup>+</sup> currents, delivered at a rate of 0.5-Hz. Caffeine (10-mmol/L) was used for rapid depletion and quantification of SR  $Ca^{2+}$ -content as amplitude of caffeine-induced CaT or integrated  $I_{NCX}$ . SR  $Ca^{2+}$  leak was measured as the decrease in  $[Ca^{2+}]_i$  following application of tetracaine (1-mmol/L) in the absence of extracellular  $Ca^{2+}/Na^+$ , as described by Shannon et al.<sup>36</sup> SERCA activity was determined as the difference in the rate constants of the  $I_{Ca,L}$ -triggered CaT decay (mediated by SERCA, NCX and the plasmalemmal  $Ca^{2+}$ -ATPase) and the rate constants of the caffeine-induced CaT decay (reflecting  $Ca^{2+}$  extrusion via NCX and the plasmalemmal  $Ca^{2+}$ -ATPase only) based on a mono-exponential fit in the same cardiomyocyte.<sup>10,11</sup> SCaEs were analyzed prior to tetracaine application during 0-mmol/L extracellular  $Ca^{2+}/Na^+$  and during acute application of interleukin (IL)-1 $\beta$  (40-ng/mL) in the presence of 5-mmol/L extracellular  $Ca^{2+}$  at a holding potential of -80 mV. SCaEs were detected using custom Matlab (Mathworks, Natick, MA) software as local maxima exceeding 10% of the CaT amplitude in a low-pass filtered (40-ms average) version of the fluorescence signal and SCaE incidence was normalized to recording length. SCaE detection was visually confirmed by one of the investigators.

Only striated,  $Ca^{2+}$ -tolerant cells with clear membrane delineation were used for patch-clamp analyses. Cells were excluded from analysis in case of incomplete (due to cardiomyocyte death) or unstable recordings (increasing leak, varying seal resistance, unsuccessful caffeine application, artifacts due to cell contraction or debris). The number of recordings excluded for different reasons for all experiments are indicated in **Online Figure I**.

**Preparation of cardiomyocyte-enriched fractions**

Cardiomyocyte-enriched fractions were obtained from human atrial samples using bovine serum albumin (BSA)-gradient filtration, as previously described.<sup>26</sup> In brief, isolated cells obtained after collagenase/protease digestion and centrifugation of right-atrial tissue samples were re-suspended at room temperature in Ca<sup>2+</sup>-free Tyrode's solution containing 0.1% BSA. Cell suspensions were pooled, layered over a 6% BSA gradient and allowed to sediment for 45 min.<sup>26</sup> Cell debris and undigested tissue fragments were largely located in the upper part of the 6% BSA fraction, whereas non-cardiomyocytes (fibroblasts, etc.), were mainly retained at the phase boundary between 0.1% and 6% BSA. Atrial cardiomyocytes (rod-shaped, striated) were enriched at the bottom of the gradient, as verified by light microscopy and cardiomyocyte-enriched fractions are negative for the specific macrophage/eosinophilic-granulocyte marker F4/80.<sup>26,18</sup> Dog atrial cardiomyocyte- and atrial fibroblast-enriched fractions were obtained from atrial tissue available from prior studies in male and female control mongrel dogs (n=4) or mongrel dogs with atrial tachycardia-related remodeling (atrial tachypacing at 600 bpm for 1 week; n=2) of unknown age (Laka Inc., Montreal, CA), as previously described.<sup>62,63</sup> Animal care procedures were approved by the Animal Research Ethics Committee of the Montreal Heart Institute. After ketamine (5.3 mg/kg, intravenously)/diazepam (0.25 mg/kg, intravenously)/1.5% isoflurane anesthesia, atrial tachycardia-related remodeling dogs underwent fluoroscopically guided bipolar pacing-lead insertion into the RA appendage connected to a pacemaker in the neck. After 24 hours of postoperative recovery, dogs were paced at 600 bpm to maintain fibrillatory atrial activity. For the terminal study, dogs were anesthetized with morphine (2 mg/kg subcutaneously) and  $\alpha$ -chloralose (120 mg/kg intravenous bolus, followed by 29.25 mg/kg per hour maintenance dose) and ventilated mechanically. Control animals were anesthetized with sodium pentobarbital (30 mg/kg), intubated and mechanically ventilated. Hearts were removed after right thoracotomy and heparin injection. In the present study, canine tissue was used for antibody validation only; these tissues had been obtained during previous experiments and fast-frozen in liquid nitrogen for subsequent use.

**Western blot analyses**

Human atrial whole-tissue lysates, human cardiomyocyte fractions, HL-1 cells, dog atrial cardiomyocytes, or dog atrial fibroblasts were subjected to electrophoresis on 5%, 10%, 12% or 15% acrylamide gels, followed by transfer onto polyvinyl difluoride (PVDF) membranes. Protein levels were quantified by Western blotting using the primary antibodies listed in [Online Table V](#).<sup>25</sup> The Ser2808-RyR2 and Ser2814-RyR2 phospho-epitope-specific antibodies were custom generated using the peptide C-RTRRI-(pS)-QTSQV corresponding to the protein kinase A (PKA)-dependent phosphorylation site region at Ser2808 and peptide CSQTSQV-(pS)-VD corresponding to the Ca<sup>2+</sup>/calmodulin-dependent protein kinase-II (CaMKII)-dependent phosphorylation site region at Ser2814, as previously described.<sup>10,11</sup> Appropriate near-infrared fluorophore dyes (IRDye, all 1:15,000 or 1:20,000, LI-COR Biosciences, Lincoln, NE) were employed as secondary antibodies and imaged with an Odyssey Infrared Imaging System (LI-COR Biosciences). Protein expression was normalized to GAPDH or to total protein-levels at 250 kDa (Ponceau staining). Samples excluded from Western blot analyses due to technical issues or because patients did not meet the inclusion criteria for this study have been indicated in the complete Western blot overview available online.

200 **Online Table V. Antibodies used for Western blot experiments.**

| Target                   | Antibody (Manufacturer)                             | Dilution | Host           |
|--------------------------|-----------------------------------------------------|----------|----------------|
| ASC                      | sc-22514-R (Santa Cruz) and sc-514414 (Santa Cruz)  | 1:500    | Rabbit / Mouse |
| $\alpha$ -SMA            | A5228 (Sigma-Aldrich)                               | 1:500    | Mouse          |
| Calmodulin               | ab45689 (Abcam)                                     | 1:1,000  | Rabbit         |
| Calsequestrin2           | PA1-913 (Thermo Fisher)                             | 1:2,500  | Rabbit         |
| CaMKII $\delta$ (Total)  | 611293 (BD Biosciences)                             | 1:1,000  | Mouse          |
| CaMKII $\delta$ (Thr287) | ab32678 (Abcam)                                     | 1:1,000  | Mouse          |
| (Pro-)Caspase-1          | sc-56036 (Santa Cruz) and 3019-100 (Biovision)      | 1:250    | Mouse / Rabbit |
| Caspase-1 (p20)          | AG-20B-0042-C100 (AdipoGen)                         | 1:500    | Mouse          |
| CD68                     | ab201973 (Abcam)                                    | 1:200    | Mouse          |
| CD206                    | ab64693 (Abcam)                                     | 1:500    | Rabbit         |
| Collagen1a1              | sc-25974 (Santa Cruz)                               | 1:200    | Goat           |
| Connexin40               | AB1726 (Merck Millipore)                            | 1:500    | Rabbit         |
| Connexin43               | 3511 (Cell Signaling)                               | 1:200    | Rabbit         |
| F4/80                    | ab16911 (Abcam)                                     | 1:500    | Rat            |
| Fibronectin              | sc-8422 (Santa Cruz)                                | 1:1,000  | Mouse          |
| GAPDH                    | 5G4 6C5 (HyTest)                                    | 1:20,000 | Mouse          |
| Gasdermin-D              | PA5-30823 (Thermo Fisher) and G7422 (Sigma-Aldrich) | 1:500    | Rabbit         |
| (Pro-)IL-1 $\beta$       | ab9722 (Abcam)                                      | 1:250    | Rabbit         |
| MMP9                     | ab38898 (Abcam)                                     | 1:200    | Rabbit         |
| cMyBP-C                  | ab133499 (Abcam)                                    | 1:1,000  | Rabbit         |
| NCX1                     | R3F1 (Swant)                                        | 1:1,000  | Goat           |
| NF $\kappa$ B (Total)    | NB100-56712 (Novus Biologicals)                     | 1:500    | Mouse          |
| NF $\kappa$ B (Ser536)   | NB100-82088 (Novus Biologicals)                     | 1:500    | Rabbit         |
| NLRP3                    | NBP1-77080 (Novus Biologicals)                      | 1:500    | Rabbit         |
| P2X7R                    | sc-15200 (Santa Cruz)                               | 1:250    | Goat           |
| PLB (Total)              | ab2865 (Abcam)                                      | 1:2,000  | Mouse          |
| PLB (Ser16)              | ab92697 (Abcam)                                     | 1:1,000  | Rabbit         |
| PLB (Thr17)              | A010-13 (Badrilla)                                  | 1:2,500  | Rabbit         |
| RyR2 (Total)             | MA3-916 (Thermo Fisher)                             | 1:1,000  | Mouse          |
| RyR2 (Ser2808)           | Custom                                              | 1:1,000  | Rabbit         |
| RyR2 (Ser2814)           | Custom                                              | 1:2,000  | Rabbit         |
| SERCA2a                  | sc-8095 (Santa Cruz)                                | 1:2,000  | Goat           |
| TGF- $\beta$ 1           | ab9758 (Abcam)                                      | 1:200    | Rabbit         |
| TLR4                     | NB100-56566 (Novus Biologicals)                     | 1:250    | Mouse          |
| Troponin-C               | 10R-T122a (Fitzgerald)                              | 1:500    | Mouse          |
| Troponin-I               | 4002 (Cell Signaling)                               | 1:500    | Rabbit         |
| Vimentin                 | sc-373717 (Santa Cruz)                              | 1:1,000  | Mouse          |

**RyR2 single-channel recordings**

205 Single-channel recordings of the cardiac ryanodine receptor type-2 (RyR2) channel were obtained as previously described.<sup>10,11,27</sup> In brief, atrial SR membrane-preparations were incorporated into lipid-bilayer membranes comprising a 3:1 mixture of phosphatidylethanolamine and phosphatidylserine (Avanti Polar Lipids, Alabaster, AL) dissolved in n-decane (25-mg/mL). Bilayers were formed across a 150- $\mu$ m aperture of a polystyrene cuvette, with the *cis* and *trans* chambers corresponding to the cytosolic and luminal sides of the SR, respectively. The *trans* chamber contained (in mmol/L): HEPES 250, KCl 50 and Ca(OH)<sub>2</sub> 53. The *cis* chamber contained (in mmol/L): HEPES 250, Tris-base 125, KCl 50, EGTA 1, and CaCl<sub>2</sub> 0.5 (pH=7.35), resulting in 150-nmol/L free cytosolic [Ca<sup>2+</sup>] (as

210

215 determined using MaxChelator, <http://maxchelator.stanford.edu/>). Ryanodine (5- $\mu$ mol/L) was applied to the *cis* chamber at the end of each experiment to confirm identity of RyR2 channels. Data were collected using Digidata 1322A (Molecular Devices, Sunnyvale, CA) and Warner Bilayer Clamp Amplifier BC-535 (Warner Instruments, Hamden, CT) under voltage-clamp conditions at 0 mV. Data were analyzed from digitized current recordings using pCLAMP-9.2 software (Molecular Devices) and open probability, as well as mean open and closed times were determined.

220



## Computational Modeling

### *Baseline (Ctl) model*

Our recent model of human atrial cardiomyocyte  $\text{Ca}^{2+}$ -handling<sup>15</sup> was used as the basis for all simulations. The current model consists of 101 longitudinal segments of 1- $\mu\text{m}$ , each containing 18 1- $\mu\text{m}$  wide transverse domains. In each of these spatial units, local ion concentrations, including cytosolic and SR  $[\text{Ca}^{2+}]$  are simulated. RyR2 were incorporated in a banded pattern with RyR2 in every other segment, resulting in a 2- $\mu\text{m}$  distance between RyR2 bands, in line with experimental observations.<sup>28</sup> We employed homogeneous expression of RyR2 within a band. Stochastic opening of individual RyR2 was simulated using a 4-state Markov model that reproduces single-channel recordings, as previously described.<sup>11</sup> All RyR2 gate independently, but are connected through a local subspace (the SR  $\text{Ca}^{2+}$ -release space; SRS), representing the microdomain in the vicinity of the RyR2 with high local  $[\text{Ca}^{2+}]$  during systole.

Parameter optimization was performed to minimize the quantitative differences between the Ctl model and the experimentally observed  $\text{Ca}^{2+}$ -handling properties using the published values as starting point. These optimizations in  $\text{Ca}^{2+}$  diffusion, SERCA, NCX and RyR2 (**Online Table VI**) allowed the model to quantitatively reproduce all major  $\text{Ca}^{2+}$ -handling properties observed under voltage-clamp conditions (RyR2 open probability, CaT amplitude and decay, SR  $\text{Ca}^{2+}$  content and SERCA activity; **Online Figures XV-XVII**). Finally, the extracellular  $\text{Ca}^{2+}$  dependence of NCX was adjusted to prevent excessive  $\text{Ca}^{2+}$  overload during simulations with 5-mmol/L extracellular  $[\text{Ca}^{2+}]$  and maximal conductance of two ion channels ( $I_{\text{K1}}$  and  $I_{\text{NaK}}$ ) were adjusted based on experimental data obtained under current clamp conditions (**Online Table VI**).

The full model code (implemented in C++ with an optional interface to Octave/Matlab for data analysis) is available on the authors' website (<http://www.jordiheijman.net>).

### *POAF model variant*

We developed a new POAF model variant by incorporating the major differences in  $\text{Ca}^{2+}$  handling between Ctl and POAF patients: higher SERCA activity and RyR2 open probability. In particular, maximal SERCA2a activity ( $J_{\text{SERCA,max}}$ ) was increased by 30%, and RyR2 open probability was increased by adjusting  $P[0]_{\text{RyR}}$  (+37.7%) and  $P[5]_{\text{RyR}}$  (+348%), in line with our simulations of higher RyR2 open probability in paroxysmal AF.<sup>11</sup> Finally, the interaction between RyR2 was adjusted by lowering the diffusion of  $\text{Ca}^{2+}$  from the SRS to the cytosol ( $\tau_{\text{diff,SRS} \leftrightarrow \text{cyt}}$ , -16.67%) in order to maintain normal SR  $\text{Ca}^{2+}$  release in the presence of altered RyR2 gating. With the changes in these 4 parameters (**Online Table VI**, grey rows), the model accurately reproduced the higher SERCA activity and RyR2 open probability (**Online Figure XVA** and **Online Figure XVII**). Moreover, simulated diastolic and systolic  $[\text{Ca}^{2+}]$ , CaT amplitude, time constant of CaT decay and SR  $\text{Ca}^{2+}$  load (**Online Figure XVI**), as well as relative SR  $\text{Ca}^{2+}$  leak (**Online Figure XVII**) in the POAF model variant were quantitatively similar to our experimental data, further establishing the validity of this novel model variant.

265

**Simulating experimental protocols**

Extracellular ionic concentrations and voltage-clamp protocols were set to match experimental conditions for each simulation. During ruptured-patch voltage-clamp simulations, intracellular  $\text{Na}^+$  levels were clamped to 8.5-mmol/L as previously described.<sup>11</sup>

270 The effects of tetracaine and caffeine on RyR2 were simulated by acutely setting RyR2 open probability to 1.0 (in the case of caffeine) or blocking RyR2 by >99% (in the case of tetracaine). After the application of tetracaine or caffeine, RyR2 gating was released and open probability was again determined by cytosolic and SR  $[\text{Ca}^{2+}]$ .

275 Experimental data on the acute effects of (post-operative) inflammation on cardiomyocyte  $\text{Ca}^{2+}$ -handling are scarce, particularly for human atrial cardiomyocytes. Accordingly, we opted for a parsimonious approach with a minimal number of parameter changes to simulate IL-1 $\beta$  application. Reduced CaT amplitude is a highly consistent finding in response to acute (5 min – 24 hours) stimulation with IL-1 $\beta$ , IL-6 or tumor necrosis factor- $\alpha$  (TNF $\alpha$ ).<sup>30,64-67</sup> In

280 several (but not all<sup>67</sup>) studies the reduced CaT amplitude is accompanied by a reduced SR  $\text{Ca}^{2+}$  content and increased incidence of SCAEs.<sup>30,65</sup> Furthermore, conflicting evidence exists about SERCA function, with reports of both unchanged<sup>67</sup> and decreased<sup>65,68</sup> SERCA2a expression, as well as decreased expression of the SERCA2a-inhibitory subunit phospholamban,<sup>68</sup> which could potentially normalize SERCA function in the presence of

285 decreased expression. Similarly, both unchanged<sup>64</sup> and reduced<sup>65</sup>  $I_{\text{Ca,L}}$  in response to IL-1 $\beta$ , IL-6 or tumor necrosis factor- $\alpha$  (TNF) stimulation have been reported. Taking into account differences in inflammatory factors and stimulus durations, these data suggest increased RyR2-mediated SR  $\text{Ca}^{2+}$  leak as a potential mechanism underlying reduced CaT amplitude and increased incidence of SCAEs. Accordingly, we simulated IL-1 $\beta$  stimulation as an

290 additional 25% increase in RyR2 open probability (**Online Figure XV**) and altered diffusion of  $\text{Ca}^{2+}$  between the SRS units and from the SRS to the cytosol ( $\tau_{\text{diff,SRS} \leftrightarrow \text{cyt}}$ ; **Online Table VI**), reflecting the coupling between neighboring RyR2. With this minimal set of changes in 3 parameters, the model could quantitatively reproduce the experimentally observed difference in SCAE incidence between Ctl and POAF during acute stimulation with 40-ng/mL IL-1 $\beta$

295 (**Online Figure XVIII**). Since the effects of IL-1 $\beta$  application are associated with a slight delay due to the activation of the intracellular signaling cascades that eventually lead to alterations in  $\text{Ca}^{2+}$ -handling proteins, the parameter changes were implemented gradually over a period of 10 seconds.

300

**Online Table VI. Changes in model parameters compared to the reference model of the human atrial cardiomyocyte with spatial Ca<sup>2+</sup> handling.<sup>15</sup>**

|                                                | Parameter                                              | Published model <sup>15</sup>                                                                                                                                                                                      | Ctl (+IL-1 $\beta$ ) model           | poAF (+IL-1 $\beta$ ) model          |
|------------------------------------------------|--------------------------------------------------------|--------------------------------------------------------------------------------------------------------------------------------------------------------------------------------------------------------------------|--------------------------------------|--------------------------------------|
| <b>Ca<sup>2+</sup>-diffusion and buffering</b> | $\tau_{diff,SRS} \rightarrow_{cyt}$ (ms)               | 10                                                                                                                                                                                                                 | 12 ( <b>7.5</b> )                    | 10                                   |
|                                                | $\tau_{diff,seg,SRS}$ (ms)                             | 0.220                                                                                                                                                                                                              | 0.150                                | 0.150 ( <b>0.100</b> )               |
|                                                | $\tau_{diff,dom,SRS}$ (ms)                             | 0.160                                                                                                                                                                                                              | 0.050                                | 0.050 ( <b>0.040</b> )               |
|                                                | <b>Ca<sup>2+</sup>-buffer factor</b>                   | 1.000                                                                                                                                                                                                              | 0.850                                | 0.850                                |
| <b>SERCA</b>                                   | $J_{SERCA,max}$ (mmol/L ms <sup>-1</sup> )             | 3.187e-3                                                                                                                                                                                                           | 2.124e-3                             | 2.762e-3                             |
|                                                | <b>SERCA2a K<sub>m,r</sub></b> (mmol/L)                | 1.250                                                                                                                                                                                                              | 1.750                                | 1.750                                |
|                                                | <b>SERCA2a K<sub>m,f</sub></b> (mmol/L)                | 6.250e-4                                                                                                                                                                                                           | 5.000e-4                             | 5.000e-4                             |
| <b>NCX</b>                                     | $I_{NCX,max}$ (pA/pF)                                  | 4.253                                                                                                                                                                                                              | 1.842                                | 1.842                                |
|                                                | <b>[Ca<sup>2+</sup>]<sub>o</sub> observed</b> (mmol/L) | 1.0*[Ca <sup>2+</sup> ] <sub>o</sub>                                                                                                                                                                               | 0.1*[Ca <sup>2+</sup> ] <sub>o</sub> | 0.1*[Ca <sup>2+</sup> ] <sub>o</sub> |
| <b>RyR2</b>                                    | $N_{RyRs}$                                             | 2,772,000                                                                                                                                                                                                          | 9,900,000                            | 9,900,000                            |
|                                                | <b>P[0]<sub>RyR</sub></b>                              | 0.200                                                                                                                                                                                                              | 0.620                                | 0.85374                              |
|                                                | <b>P[5]<sub>RyR</sub></b>                              | 0.0035                                                                                                                                                                                                             | 0.0147 ( <b>0.018375</b> )           | 0.06581 ( <b>0.08226</b> )           |
|                                                | <b>P[7]<sub>RyR</sub></b>                              | 9.000e-4                                                                                                                                                                                                           | 1.000e-3                             | 1.000e-3                             |
|                                                | <b>P[8]<sub>RyR</sub></b>                              | 8.000e-5                                                                                                                                                                                                           | 7.000e-5                             | 7.000e-5                             |
| <b>Other ion channels</b>                      | $G_{K1,max}$ (mS/ $\mu$ F)                             | 6.563e-2                                                                                                                                                                                                           | 9.188e-2                             | 9.188e-2                             |
|                                                | $I_{NaK,max}$ (pA/pF)                                  | 1.260                                                                                                                                                                                                              | 0.630                                | 0.630                                |
|                                                | $I_{CaL}$                                              | Ctl and POAF as in Voigt et al. <sup>6</sup> with<br>$ACT_{\infty} = \frac{1}{\left(1 + \exp\left(-\frac{V_M - 13.56}{7.0}\right)\right)} \cdot \frac{1}{\left(1 + \exp\left(-\frac{V_M + 25}{5.0}\right)\right)}$ |                                      |                                      |

305 Grey shaded rows highlight parameters that are different between Ctl and POAF model version. Bold numbers in orange represent parameter values during simulated IL-1 $\beta$  stimulation.

## Supplemental Analyses

310

**Online Table VII. Overview of statistical properties and tests employed.** Intra-class correlation coefficient (ICC) for experiments in which one patient can provide multiple data points, normality of data distribution for Ctl and POAF groups or HL-1 cells in the absence or presence of IL-1 $\beta$  assessed using the D'Agostino & Pearson omnibus normality test, statistical test employed to compare both groups based on these characteristics and corresponding P-values for all parameters studied. Significant values are shown in bold.

315

| Fig. | Parameter                                                               | ICC   | Norm. dist.<br>(Ctl / POAF) | Statistical Test                                          | P-value      |
|------|-------------------------------------------------------------------------|-------|-----------------------------|-----------------------------------------------------------|--------------|
| 1B   | I <sub>Ca,L</sub> amplitude (ruptured patch)                            | <0.01 | Yes / No                    | Multilevel models with log-transformed data               | 0.425        |
| 1C   | CaT amplitude                                                           | 0.107 | Yes / Yes                   | Multilevel models                                         | <b>0.007</b> |
| 1D   | $\tau$ CaT decay                                                        | 0.252 | No / Yes                    | Multilevel models with log-transformed data               | 0.121        |
| 2B   | cCaT amplitude                                                          | 0.302 | Yes / Yes                   | Multilevel models                                         | 0.638        |
| 2B   | SR Ca <sup>2+</sup> load / Integrated I <sub>NCX</sub>                  | 0.501 | Yes / Yes                   | Multilevel models                                         | 0.675        |
| 2C   | Peak caffeine-induced I <sub>NCX</sub>                                  | 0.394 | Yes / No                    | Multilevel models with log-transformed data               | 0.580        |
| 2C   | Slope I <sub>NCX</sub> vs. [Ca <sup>2+</sup> ] <sub>i</sub>             | 0.460 | No / No                     | Multilevel models with log-transformed data               | 0.902        |
| 2D   | k <sub>syst</sub>                                                       | 0.212 | Yes / Yes                   | Multilevel models                                         | 0.135        |
| 2D   | k <sub>caff</sub>                                                       | 0.944 | Yes / Yes                   | Multilevel models                                         | 0.921        |
| 2D   | k <sub>SERCA</sub>                                                      | <0.01 | Yes / Yes                   | Multilevel models                                         | 0.075        |
| 3A   | SR Ca <sup>2+</sup> leak/load (Na <sup>+</sup> /Ca <sup>2+</sup> -free) | <0.01 | Yes / No                    | Multilevel models with log-transformed data               | <b>0.035</b> |
| 3C   | SCaE incidence (Na <sup>+</sup> /Ca <sup>2+</sup> -free)                | 0.037 | No / Yes                    | Multilevel models with log-transformed data               | <b>0.011</b> |
| 3E   | Spontaneous I <sub>NCX</sub> incidence at -50 mV (perforated patch)     | 0.878 | No / No                     | Multilevel models with log-transformed data               | <b>0.044</b> |
| 4A   | RyR2 Open probability                                                   | 0.260 | Yes / No                    | Multilevel models with log-transformed data               | <b>0.009</b> |
| 4A   | RyR2 Mean open time                                                     | 0.173 | No / No                     | Multilevel models with log-transformed data               | 0.561        |
| 4A   | RyR2 Mean closed time                                                   | <0.01 | Yes / No                    | Multilevel models with log-transformed data               | <b>0.046</b> |
| 4C   | Total-RyR2                                                              | N/A   | Yes / Yes                   | Unpaired Student's <i>t</i> -test                         | 0.884        |
| 4C   | Ser2814-RyR2                                                            | N/A   | Yes / Yes                   | Unpaired Student's <i>t</i> -test                         | 0.323        |
| 4C   | Ser2814/Total-RyR2                                                      | N/A   | Yes / Yes                   | Unpaired Student's <i>t</i> -test                         | <b>0.040</b> |
| 4C   | Total-CaMKII $\delta_C$                                                 | N/A   | Yes / Yes                   | Unpaired Student's <i>t</i> -test                         | <b>0.019</b> |
| 4C   | Thr287-CaMKII $\delta_C$                                                | N/A   | Yes / Yes                   | Unpaired Student's <i>t</i> -test with Welch's correction | <b>0.021</b> |
| 4C   | Thr287/Total-CaMKII $\delta_C$                                          | N/A   | Yes / Yes                   | Unpaired Student's <i>t</i> -test                         | 0.166        |
| 5A   | NLRP3 (125 kDa)                                                         | N/A   | Yes / Yes                   | Unpaired Student's <i>t</i> -test with Welch's correction | <b>0.023</b> |
| 5A   | ASC                                                                     | N/A   | Yes / Yes                   | Unpaired Student's <i>t</i> -test with Welch's correction | 0.056        |
| 5A   | Pro-Casp1                                                               | N/A   | Yes / Yes                   | Unpaired Student's <i>t</i> -test with Welch's correction | <b>0.038</b> |
| 5A   | GSDMD-FL                                                                | N/A   | N/D / N/D                   | Mann-Whitney test                                         | <b>0.030</b> |
| 5A   | Pro-IL-1 $\beta$                                                        | N/A   | Yes / Yes                   | Unpaired Student's <i>t</i> -test                         | 0.178        |

|             |                                                                       |            |                                                                        |                                                           |                  |
|-------------|-----------------------------------------------------------------------|------------|------------------------------------------------------------------------|-----------------------------------------------------------|------------------|
| 5A          | Casp1-p20                                                             | N/A        | N/D / N/D                                                              | Mann-Whitney test                                         | 0.413            |
| 5A          | GSDMD-NT                                                              | N/A        | N/D / N/D                                                              | Mann-Whitney test                                         | 0.931            |
| 5A          | IL-1 $\beta$                                                          | N/A        | Yes / Yes                                                              | Unpaired Student's <i>t</i> -test with Welch's correction | 0.402            |
| 5B          | TLR4                                                                  | N/A        | Yes / Yes                                                              | Unpaired Student's <i>t</i> -test with Welch's correction | <b>0.032</b>     |
| 5B          | NF $\kappa$ B-total                                                   | N/A        | Yes / Yes                                                              | Unpaired Student's <i>t</i> -test with Welch's correction | <b>0.027</b>     |
| 5B          | NF $\kappa$ B-Ser536                                                  | N/A        | Yes / No                                                               | Mann-Whitney test                                         | 0.468            |
| 5B          | NF $\kappa$ B-Ser536/Total-NF $\kappa$ B                              | N/A        | Yes / Yes                                                              | Unpaired Student's <i>t</i> -test                         | 0.426            |
| 5B          | P2X7R                                                                 | N/A        | Yes / Yes                                                              | Unpaired Student's <i>t</i> -test with Welch's correction | <b>0.008</b>     |
| 5C          | F4/80                                                                 | N/A        | Yes / Yes                                                              | Unpaired Student's <i>t</i> -test                         | <b>0.019</b>     |
| 5C          | CD68                                                                  | N/A        | Yes / Yes                                                              | Unpaired Student's <i>t</i> -test with Welch's correction | <b>0.035</b>     |
| 5C          | CD206                                                                 | N/A        | Yes / Yes                                                              | Unpaired Student's <i>t</i> -test                         | 0.416            |
| 6F          | NLRP3 (125 kDa)                                                       | N/A        | Yes / Yes                                                              | Unpaired Student's <i>t</i> -test with Welch's correction | 0.534            |
| 6F          | ASC                                                                   | N/A        | Yes / Yes                                                              | Unpaired Student's <i>t</i> -test with Welch's correction | <b>0.004</b>     |
| 6F          | Pro-Casp1                                                             | N/A        | Yes / No                                                               | Mann-Whitney test                                         | <b>0.006</b>     |
| 6F          | GSDMD-FL                                                              | N/A        | Yes / Yes                                                              | Unpaired Student's <i>t</i> -test with Welch's correction | <b>0.041</b>     |
| 6F          | Pro-IL-1 $\beta$                                                      | N/A        | Yes / Yes                                                              | Unpaired Student's <i>t</i> -test with Welch's correction | <b>0.029</b>     |
| 6G          | Casp1-p37                                                             | N/A        | Yes / No                                                               | Mann-Whitney test                                         | <b>&lt;0.001</b> |
| 6G          | Casp1-p20                                                             | N/A        | Yes / No                                                               | Mann-Whitney test                                         | 0.174            |
| 6G          | Casp1-p10                                                             | N/A        | Yes / Yes                                                              | Unpaired Student's <i>t</i> -test with Welch's correction | <b>0.002</b>     |
| 6G          | GSDMD-NT                                                              | N/A        | Yes / Yes                                                              | Unpaired Student's <i>t</i> -test with Welch's correction | <b>0.008</b>     |
| 6G          | GSDMD-CT                                                              | N/A        | Yes / Yes                                                              | Unpaired Student's <i>t</i> -test                         | <b>0.015</b>     |
| 6G          | IL-1 $\beta$                                                          | N/A        | Yes / No                                                               | Mann-Whitney test                                         | 0.054            |
| 7C          | Susceptibility to SCaEs                                               | N/A        | Categorical                                                            | Fisher's exact test                                       | <b>0.003</b>     |
| 7D          | SCaE incidence (5 mmol/L Ca <sup>2+</sup> + IL-1 $\beta$ )            | <0.01      | No / Yes                                                               | Multilevel models with log-transformed data               | <b>0.003</b>     |
| <b>Fig.</b> | <b>Parameter</b>                                                      | <b>ICC</b> | <b>Norm. dist. (-IL-1<math>\beta</math> / +IL-1<math>\beta</math>)</b> | <b>Statistical Test</b>                                   | <b>P-value</b>   |
| <b>8A</b>   | SCaE incidence HL-1 cells (5 mmol/L Ca <sup>2+</sup> + IL-1 $\beta$ ) | N/A        | Yes / Yes                                                              | Unpaired Student's <i>t</i> -test                         | <b>0.031</b>     |
| <b>8C</b>   | Ser2808-RyR2                                                          | N/A        | Yes / Yes                                                              | Unpaired Student's <i>t</i> -test with Welch's correction | <b>0.023</b>     |
| <b>8C</b>   | Ser2814-RyR2                                                          | N/A        | Yes / Yes                                                              | Unpaired Student's <i>t</i> -test with Welch's correction | <b>0.001</b>     |
| <b>8C</b>   | Ser16-PLB                                                             | N/A        | Yes / Yes                                                              | Unpaired Student's <i>t</i> -test                         | 0.115            |
| <b>8C</b>   | Thr17-PLB                                                             | N/A        | Yes / Yes                                                              | Unpaired Student's <i>t</i> -test with Welch's correction | <b>0.004</b>     |
| <b>8D</b>   | Ser2808-RyR2 KN-92/KN-93                                              | N/A        | Yes / Yes                                                              | Unpaired Student's <i>t</i> -test                         | 0.239            |
| <b>8D</b>   | Ser2814-RyR2 KN-92/KN-93                                              | N/A        | Yes / Yes                                                              | Unpaired Student's <i>t</i> -test                         | <b>&lt;0.001</b> |
| <b>8D</b>   | Ser16-PLB KN-92/KN-93                                                 | N/A        | Yes / Yes                                                              | Unpaired Student's <i>t</i> -test                         | 0.457            |

|             |                                                                    |            |                                     |                                                              |                     |
|-------------|--------------------------------------------------------------------|------------|-------------------------------------|--------------------------------------------------------------|---------------------|
| <b>8D</b>   | Thr17-PLB<br>KN-92/KN-93                                           | N/A        | Yes / Yes                           | Unpaired Student's <i>t</i> -test with<br>Welch's correction | <b>0.002</b>        |
| <b>8F</b>   | NLRP3 (125 kDa)                                                    | N/A        | Yes / Yes                           | Unpaired Student's <i>t</i> -test                            | 0.264               |
| <b>8F</b>   | Pro-Caspase1                                                       | N/A        | Yes / Yes                           | Unpaired Student's <i>t</i> -test                            | 0.229               |
| <b>8F</b>   | GSDMD-FL                                                           | N/A        | Yes / Yes                           | Unpaired Student's <i>t</i> -test                            | 0.318               |
| <b>8F</b>   | Casp1-p20                                                          | N/A        | Yes / Yes                           | Unpaired Student's <i>t</i> -test with<br>Welch's correction | <b>0.011</b>        |
| <b>8F</b>   | GSDMD-NT                                                           | N/A        | Yes / Yes                           | Unpaired Student's <i>t</i> -test                            | <b>0.027</b>        |
| <b>8G</b>   | Casp1-p20<br>KN-92/KN-93                                           | N/A        | Yes / Yes                           | Unpaired Student's <i>t</i> -test                            | 0.123               |
| <b>8G</b>   | GSDMD-NT<br>KN-92/KN-93                                            | N/A        | No / No                             | Mann-Whitney test                                            | 0.762               |
| <b>Fig.</b> | <b>Parameter</b>                                                   | <b>ICC</b> | <b>Norm. dist.<br/>(Ctl / POAF)</b> | <b>Statistical Test</b>                                      | <b>P-<br/>value</b> |
| <b>IIA</b>  | $I_{Ca,L}$ integral<br>(ruptured patch)                            | 0.451      | No / Yes                            | Multilevel models with log-<br>transformed data              | 0.435               |
| <b>IIB</b>  | Diastolic $[Ca^{2+}]_i$                                            | 0.258      | No / Yes                            | Multilevel models with log-<br>transformed data              | 0.982               |
| <b>IIB</b>  | Systolic $[Ca^{2+}]_i$                                             | 0.191      | Yes / Yes                           | Multilevel models                                            | 0.246               |
| <b>IIC</b>  | CaT time to peak                                                   | 0.660      | No / No                             | Multilevel models with log-<br>transformed data              | 0.121               |
| <b>IIIA</b> | $I_{Ca,L}$ amplitude<br>(perforated patch)                         | <0.01      | No / No                             | Multilevel models with log-<br>transformed data              | 0.580               |
| <b>IIIC</b> | $V_{mid} I_{Ca,L}$ inactivation<br>(perforated patch)              | 0.268      | No / No                             | Multilevel models with log-<br>transformed data              | 0.159               |
| <b>IIID</b> | $T_{fast} I_{Ca,L}$ inactivation<br>(perforated patch)             | 0.709      | Yes / No                            | Multilevel models with log-<br>transformed data              | 0.133               |
| <b>IIID</b> | $T_{slow} I_{Ca,L}$ inactivation<br>(perforated patch)             | <0.01      | No / Yes                            | Multilevel models with log-<br>transformed data              | <b>&lt;0.001</b>    |
| <b>IIIF</b> | $T I_{Ca,L}$ recovery<br>(perforated patch)                        | <0.01      | Yes / Yes                           | Multilevel models                                            | <b>0.007</b>        |
| <b>IVB</b>  | Prevalence of<br>alternans<br>(perforated patch)                   | N/A        | Categorical                         | Chi-squared                                                  | <b>0.005</b>        |
| <b>IVC</b>  | Frequency of beat-to-<br>beat variability<br>(perforated patch)    | 0.137      | No / Yes                            | Multilevel models with log-<br>transformed data              | 0.459               |
| <b>VB</b>   | RMP                                                                | N/A        | Yes / Yes                           | Unpaired Student's <i>t</i> -test                            | 0.346               |
| <b>VB</b>   | dVdtmax                                                            | N/A        | Yes / Yes                           | Unpaired Student's <i>t</i> -test                            | 0.622               |
| <b>VB</b>   | Conduction time                                                    | N/A        | Yes / Yes                           | Unpaired Student's <i>t</i> -test                            | 0.169               |
| <b>VB</b>   | APD20                                                              | N/A        | No / No                             | Mann-Whitney test                                            | 0.846               |
| <b>VB</b>   | APD50                                                              | N/A        | Yes / Yes                           | Unpaired Student's <i>t</i> -test                            | 0.815               |
| <b>VB</b>   | APD90                                                              | N/A        | Yes / Yes                           | Unpaired Student's <i>t</i> -test                            | 0.245               |
| <b>VIA</b>  | Integrated $I_{NCX}$<br>(perforated patch)                         | 0.106      | Yes / Yes                           | Multilevel models                                            | 0.675               |
| <b>VIB</b>  | Spontaneous $I_{NCX}$<br>incidence at -80 mV<br>(perforated patch) | 0.255      | No / No                             | Multilevel models with log-<br>transformed data              | 0.999               |
| <b>VII</b>  | SERCA                                                              | N/A        | Yes / Yes                           | Unpaired Student's <i>t</i> -test                            | 0.657               |
| <b>VII</b>  | Total-PLB                                                          | N/A        | Yes / Yes                           | Unpaired Student's <i>t</i> -test                            | 0.604               |
| <b>VII</b>  | Ser16-PLB                                                          | N/A        | Yes / Yes                           | Unpaired Student's <i>t</i> -test                            | <b>0.047</b>        |
| <b>VII</b>  | Ser16-PLB/Total-PLB                                                | N/A        | Yes / Yes                           | Unpaired Student's <i>t</i> -test                            | 0.120               |
| <b>VII</b>  | Thr17-PLB                                                          | N/A        | Yes / No                            | Mann-Whitney test                                            | 0.487               |
| <b>VII</b>  | Thr17-PLB/Total-PLB                                                | N/A        | Yes / No                            | Mann-Whitney test                                            | 0.651               |
| <b>VII</b>  | NCX1 (160 kDa)                                                     | N/A        | Yes / Yes                           | Unpaired Student's <i>t</i> -test                            | 0.620               |
| <b>VII</b>  | NCX1 (120 kDa)                                                     | N/A        | No / Yes                            | Mann-Whitney test                                            | 0.888               |
| <b>VIIA</b> | SR $Ca^{2+}$ leak                                                  | 0.126      | Yes / Yes                           | Multilevel models                                            | 0.090               |

| (Na <sup>+</sup> /Ca <sup>2+</sup> -free) |                                                                         |       |             |                                                           |              |
|-------------------------------------------|-------------------------------------------------------------------------|-------|-------------|-----------------------------------------------------------|--------------|
| <b>VIIB</b>                               | cCaT amplitude (Na <sup>+</sup> /Ca <sup>2+</sup> -free)                | <0.01 | Yes / Yes   | Multilevel models                                         | <b>0.030</b> |
| <b>VIIC</b>                               | SR Ca <sup>2+</sup> leak/load (Na <sup>+</sup> /Ca <sup>2+</sup> -free) | <0.01 | Yes / No    | Multilevel models with log-transformed data               | <b>0.035</b> |
| <b>VIID</b>                               | cMyBP-C                                                                 | N/A   | Yes / Yes   | Unpaired Student's <i>t</i> -test                         | 0.172        |
| <b>VIID</b>                               | Troponin-C                                                              | N/A   | Yes / Yes   | Unpaired Student's <i>t</i> -test with Welch's correction | 0.291        |
| <b>VIID</b>                               | Troponin-I                                                              | N/A   | Yes / Yes   | Unpaired Student's <i>t</i> -test                         | 0.071        |
| <b>VIID</b>                               | Calmodulin                                                              | N/A   | Yes / Yes   | Unpaired Student's <i>t</i> -test                         | 0.950        |
| <b>IXA</b>                                | Total-RyR2 (from Ser2808)                                               | N/A   | Yes / Yes   | Unpaired Student's <i>t</i> -test with Welch's correction | 0.482        |
| <b>IXA</b>                                | Ser2808-RyR2                                                            | N/A   | Yes / Yes   | Unpaired Student's <i>t</i> -test                         | 0.680        |
| <b>IXA</b>                                | Ser2808/Total-RyR2                                                      | N/A   | Yes / Yes   | Unpaired Student's <i>t</i> -test                         | 0.261        |
| <b>IXB</b>                                | Calsequestrin                                                           | N/A   | No / Yes    | Mann-Whitney test                                         | 0.881        |
| <b>X</b>                                  | Total-CaMKII $\delta_B + \delta_9$                                      | N/A   | Yes / Yes   | Unpaired Student's <i>t</i> -test                         | 0.239        |
| <b>X</b>                                  | Thr287-CaMKII $\delta_B + \delta_9$                                     | N/A   | Yes / Yes   | Unpaired Student's <i>t</i> -test                         | 0.102        |
| <b>X</b>                                  | Thr287/Total-CaMKII $\delta_B + \delta_9$                               | N/A   | Yes / Yes   | Unpaired Student's <i>t</i> -test                         | 0.176        |
| <b>XIII</b>                               | Fibronectin                                                             | N/A   | Yes / No    | Mann-Whitney test                                         | 0.671        |
| <b>XIII</b>                               | Col1a1                                                                  | N/A   | Yes / Yes   | Unpaired Student's <i>t</i> -test                         | 0.194        |
| <b>XIII</b>                               | Vimentin                                                                | N/A   | Yes / Yes   | Unpaired Student's <i>t</i> -test                         | 0.424        |
| <b>XIII</b>                               | MMP9                                                                    | N/A   | Yes / Yes   | Unpaired Student's <i>t</i> -test                         | 0.336        |
| <b>XIII</b>                               | $\alpha$ -SMA                                                           | N/A   | Yes / No    | Mann-Whitney test                                         | 0.081        |
| <b>XIII</b>                               | TGF- $\beta$ 1                                                          | N/A   | Yes / Yes   | Unpaired Student's <i>t</i> -test                         | 0.230        |
| <b>XIV</b>                                | Total-Cx40                                                              | N/A   | Yes / Yes   | Unpaired Student's <i>t</i> -test                         | 0.214        |
| <b>XIV</b>                                | Total-Cx43                                                              | N/A   | Yes / No    | Mann-Whitney test                                         | 0.281        |
| <b>XIV</b>                                | Ser368-Cx43                                                             | N/A   | Yes / No    | Mann-Whitney test                                         | 0.094        |
| <b>XIV</b>                                | Ser368/Total-Cx43                                                       | N/A   | No / No     | Mann-Whitney test                                         | 0.536        |
|                                           | Multiple (Fig. XXII – XXXII)                                            | N/A   | N/A         | Two-way ANOVA                                             | Mult.        |
| <b>XXIXA</b>                              | Severity of mitral valve insufficiency                                  | N/A   | Categorical | Chi-squared                                               | 0.160        |
| <b>XXXA</b>                               | Severity of tricuspid valve insufficiency                               | N/A   | Categorical | Chi-squared                                               | 0.525        |
| <b>XXXIA</b>                              | Severity of aortic valve insufficiency                                  | N/A   | Categorical | Chi-squared                                               | 0.836        |
| <b>XXXIII A</b>                           | NLRP3 (125 kDa) original analysis                                       | N/A   | Yes / Yes   | Unpaired Student's <i>t</i> -test with Welch's correction | <b>0.023</b> |
| <b>XXXIII B</b>                           | NLRP3 (125 kDa) blinded re-analysis                                     | N/A   | Yes / Yes   | Unpaired Student's <i>t</i> -test with Welch's correction | <b>0.016</b> |

320 **Online Table VIII.** Overview of P-values for two-way ANOVA analyses with factors post-operative rhythm (Ctl vs. POAF) and either age (<73  
 325 vs. ≥73 years), sex (male vs. female), left-atrial diameter (LAD; <42 vs. ≥42 mm), degree of mitral valve insufficiency (MVI, none/mild vs.  
 moderate/severe), tricuspid valve insufficiency (TVI, none vs. mild/moderate) or aortic valve insufficiency (AVI, none vs. mild/moderate/severe),  
 or beta-blockers (BBs) or statin use (no vs. yes) for expression levels of NLRP3-inflammasome components and Ca<sup>2+</sup>-handling parameters. P-  
 values <0.05 have been indicated in orange. § indicates significant (P<0.05) interaction with post-operative rhythm status (i.e., differences  
 associated with the clinical variable are only observed in Ctl or POAF samples). P=N/A indicates the inability to perform two-way ANOVA  
 because there are no patients in one of the four combinations of post-operative rhythm and clinical status. Selected parameters are shown in  
**Online Figures XXII-XXXII.** Due to the number of comparisons and number of patients in each of the four combinations, the statistical power  
 and robustness of these subanalyses is limited and results should be considered hypothesis generating.

| Parameter                                                       | Clinical Variable |         |         |                      |         |                      |         |         |
|-----------------------------------------------------------------|-------------------|---------|---------|----------------------|---------|----------------------|---------|---------|
|                                                                 | Age               | Sex     | LAD     | MVI                  | TVI     | AVI                  | BBs     | Statins |
| NLRP3                                                           | P=0.994           | P=0.265 | P=0.817 | P=0.923              | P=0.922 | P=0.737              | P=0.846 | P=0.015 |
| ASC                                                             | P=0.322           | P=0.820 | P=0.703 | P=0.580              | P=0.844 | P=0.554              | P=0.080 | P=0.416 |
| Pro-Caspase1                                                    | P=0.976           | P=0.462 | P=0.791 | P=N/A                | P=0.808 | P=0.908              | P=0.138 | P=0.593 |
| GSDMD-FL                                                        | P=0.182           | P=0.793 | P=N/A   | P=0.524              | P=0.606 | P=0.134              | P=0.898 | P=N/A   |
| Pro-IL-1β                                                       | P=0.411           | P=0.196 | P=0.339 | P=0.104              | P=0.272 | P=0.862              | P=0.638 | P=0.579 |
| IL-1β                                                           | P=0.870           | P=0.594 | P=0.338 | P=0.550              | P=0.123 | P=0.646              | P=0.372 | P=0.974 |
| TLR4                                                            | P=0.047           | P=0.914 | P=0.658 | P=N/A                | P=0.390 | P=0.434              | P=0.907 | P=0.646 |
| NFκB-Total                                                      | P=0.130           | P=0.864 | P=0.739 | P=0.577              | P=0.524 | P=0.100              | P=0.045 | P=0.086 |
| P2X7R                                                           | P=0.220           | P=0.782 | P=0.642 | P=0.091              | P=0.426 | P=0.996              | P=0.774 | P=0.334 |
| CD68                                                            | P=0.983           | P=0.618 | P=0.002 | P=0.893              | P=0.365 | P=0.048 <sup>§</sup> | P=0.178 | P=0.276 |
| Fibronectin                                                     | P=0.142           | P=0.458 | P=0.186 | P=0.958              | P=0.051 | P=0.006 <sup>§</sup> | P=0.868 | P=0.295 |
| CaMKIIδ <sub>C</sub> -Total                                     | P=0.340           | P=0.129 | P=N/A   | P=0.915              | P=0.904 | P=0.363              | P=0.394 | P=0.105 |
| CaMKIIδ <sub>C</sub> -Thr287                                    | P=0.035           | P=0.397 | P=N/A   | P=0.179              | P=0.985 | P=0.469              | P=0.031 | P=0.752 |
| PLB-Total                                                       | P=0.802           | P=0.058 | P=0.116 | P=0.322              | P=0.856 | P=0.326              | P=0.483 | P=0.581 |
| PLB-Ser16                                                       | P=0.535           | P=0.183 | P=0.458 | P=0.450              | P=0.992 | P=0.014              | P=0.666 | P=0.462 |
| PLB-Thr17                                                       | P=0.887           | P=0.365 | P=0.205 | P=0.009 <sup>§</sup> | P=0.866 | P=0.017              | P=0.452 | P=0.016 |
| RyR2-Total                                                      | P=0.490           | P=0.300 | P=0.206 | P=0.266              | P=0.194 | P=0.909              | P=0.938 | P=0.309 |
| RyR2-Ser2814                                                    | P=0.222           | P=0.256 | P=0.505 | P=0.144              | P=0.720 | P=0.212              | P=0.239 | P=0.399 |
| NCX1 (160 kDa)                                                  | P=0.688           | P=N/A   | P=0.049 | P=0.143              | P=0.444 | P=0.079              | P=0.800 | P=N/A   |
| C <sub>m</sub>                                                  | P=0.820           | P=0.625 | P=0.042 | P=0.989              | P=0.011 | P=0.043              | P=0.773 | P=0.002 |
| I <sub>Ca,L</sub> amplitude                                     | P=0.115           | P=0.532 | P=0.933 | P=0.070              | P=0.882 | P=0.877              | P=0.140 | P=0.278 |
| CaT amplitude                                                   | P=0.736           | P=0.256 | P=0.204 | P=0.225              | P=0.142 | P=0.096              | P=0.882 | P=0.303 |
| SCaE incidence<br>(0-mmol/L Na <sup>+</sup> /Ca <sup>2+</sup> ) | P=0.026           | P=0.076 | P=0.187 | P=N/A                | P=0.550 | P=0.847              | P=0.860 | P=0.022 |
| SCaE incidence (IL-1β)                                          | P=0.529           | P=N/A   | P=N/A   | P=0.343              | P=0.972 | P=N/A                | P=0.534 | P=0.819 |



|                                                          |         |         |         |       |       |       |         |         |
|----------------------------------------------------------|---------|---------|---------|-------|-------|-------|---------|---------|
| <b>I<sub>Ca,L</sub> amplitude<br/>(perforated patch)</b> | P=0.076 | P=0.362 | P=0.529 | P=N/A | P=N/A | P=N/A | P=0.150 | P=0.963 |
| <b>SR Ca<sup>2+</sup> load<br/>(perforated patch)</b>    | P=0.263 | P=0.697 | P=0.808 | P=N/A | P=N/A | P=N/A | P=0.249 | P=0.610 |
| <b>Spontaneous I<sub>NCX</sub> (-50 mV)</b>              | P=0.198 | P=0.077 | P=0.140 | P=N/A | P=N/A | P=N/A | P=0.593 | P=0.593 |
| <b>Spontaneous I<sub>NCX</sub> (-80 mV)</b>              | P=0.510 | P=0.192 | P=0.137 | P=N/A | P=N/A | P=N/A | P=0.561 | P=0.118 |

330 Supplemental Figures

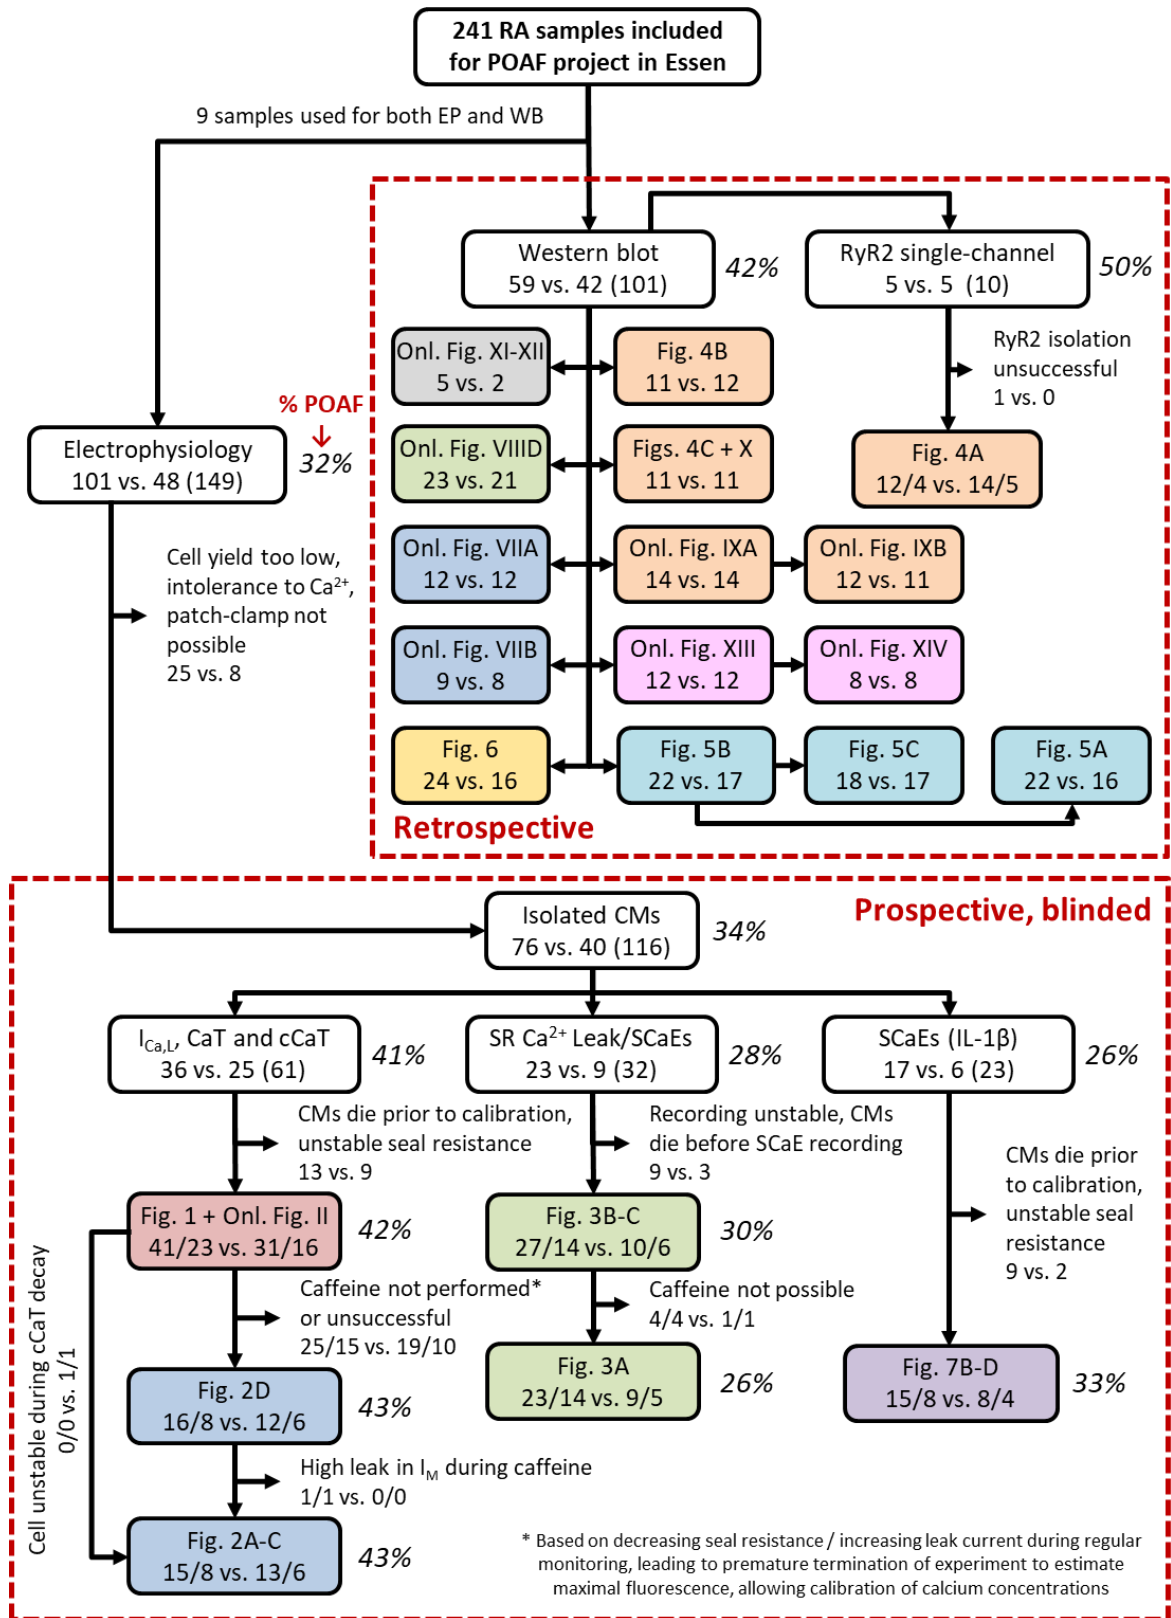

Online Figure I. Flowchart of all samples obtained by the primary research institution from Cardiac Surgery Center Essen Huttrop. Human right-atrial (RA) appendages from Essen were employed for all experiments except for action potential recordings in atrial

335 trabeculae and validation experiments using the perforated-patch clamp methodology. The  
number of samples included for individual subsets of experiments is indicated per Figure  
(Fig.) / Online Figure (Onl. Fig.) and number of unsuccessful experiments and reason for  
failure is shown. X vs. Y indicates number of Ctl patients vs. number of POAF patients and  
x/X vs. y/Y indicates number of cardiomyocytes (CMs) / number of patients in both groups.  
340 Percentages to the right of individual boxes reflect incidence of POAF. The percentage of  
patients developing POAF in each series of experiments was of the same order for all  
“prospective” experiments performed acutely on isolated atrial samples (ranging from 26%  
through 43%) and did not differ between successful and unsuccessful experiments, making it  
unlikely that our results were biased because experiments failed more often in one over the  
345 other group.

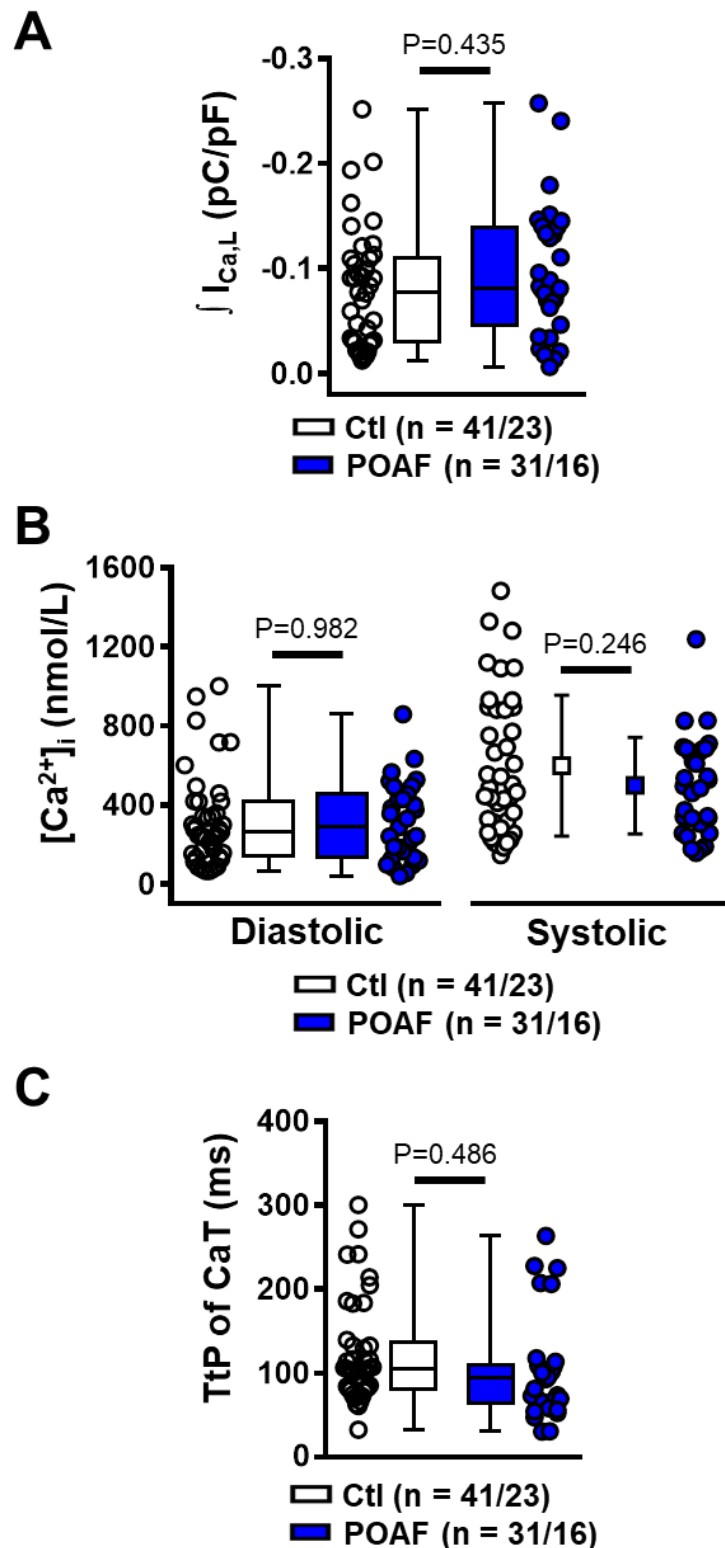

350 **Online Figure II. L-type  $Ca^{2+}$  current ( $I_{Ca,L}$ ) and  $Ca^{2+}$ -transient (CaT) measured**  
**simultaneously during ruptured-patch recordings with Fluo-3 as  $Ca^{2+}$  indicator in Ctl**  
**and POAF. A, Integrated  $I_{Ca,L}$  during a 100-ms depolarizing step to +10 mV. B-C, Diastolic**  
**and systolic intracellular  $Ca^{2+}$  levels (B), and time-to-peak (TtP) of the  $I_{Ca,L}$ -triggered CaT (C)**  
**in Ctl and POAF. N-numbers indicate numbers of cardiomyocytes/patients. P-values based**  
**355 on multilevel models (systolic  $Ca^{2+}$ ) or multilevel models with log-transformed data**  
**(integrated  $I_{Ca,L}$ , diastolic  $Ca^{2+}$ , TtP).**

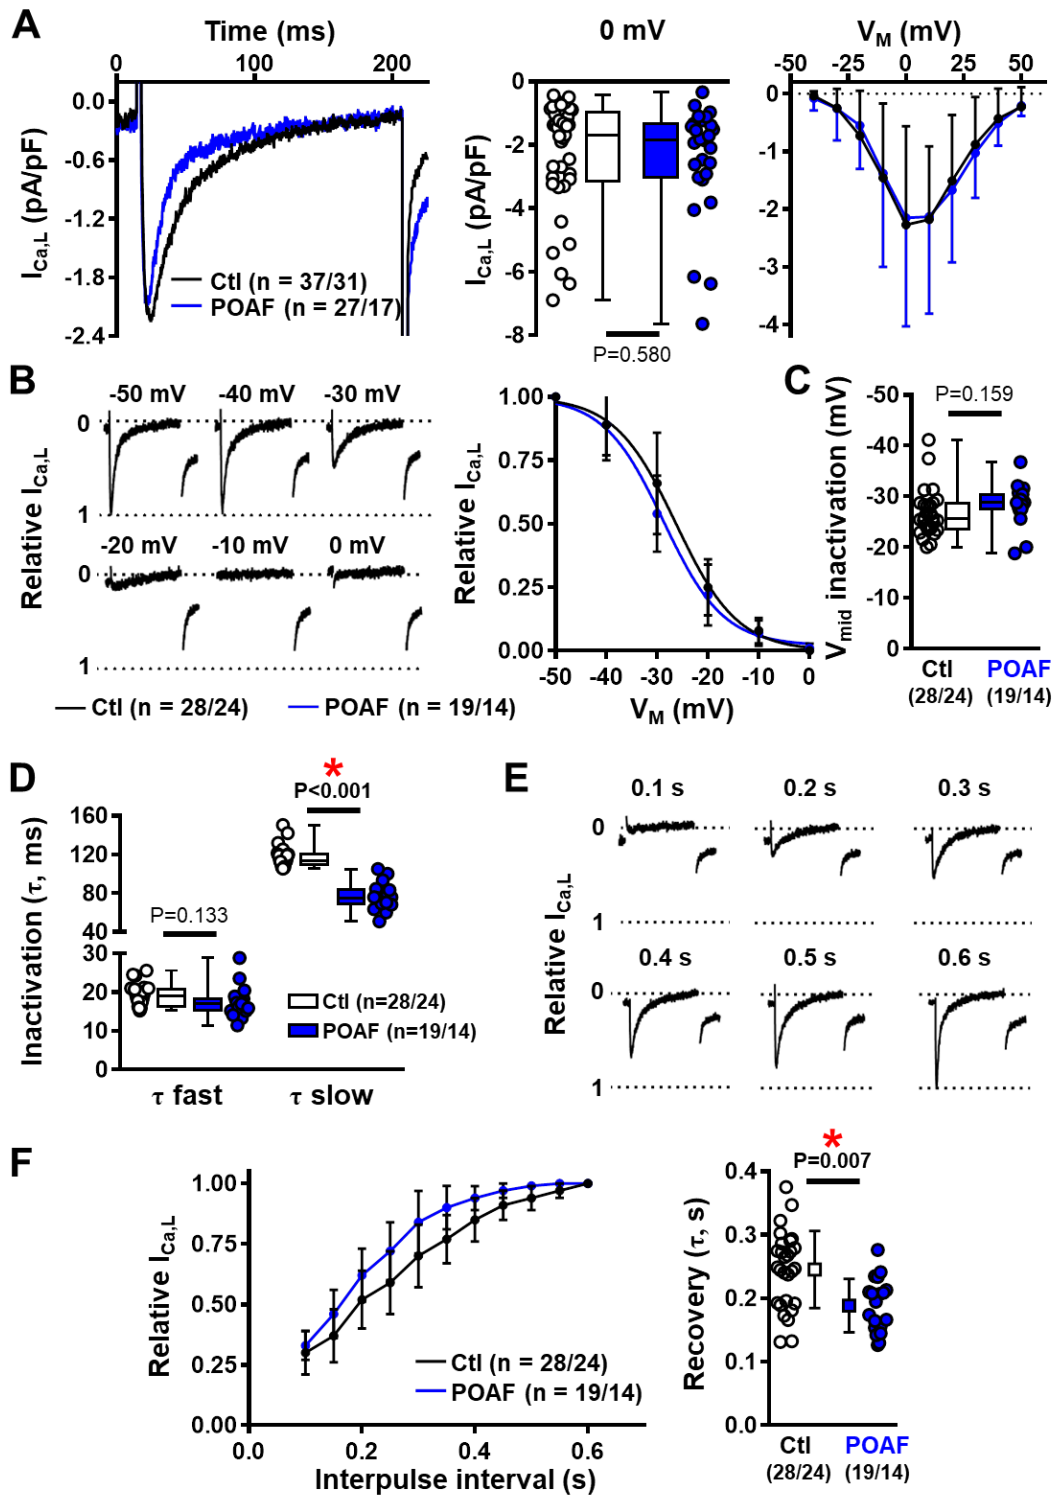

**Online Figure III. Properties of the L-type  $Ca^{2+}$ -current ( $I_{Ca,L}$ ) during perforated-patch recordings.** **A**, Example of  $I_{Ca,L}$  during a 200-ms depolarizing voltage-step to 0 mV in a Ctl and a POAF cardiomyocyte (left), group data for  $I_{Ca,L}$  amplitude in Ctl and POAF (middle), and  $I_{Ca,L}$  current-voltage (I-V) relationship (right) in Ctl (black symbols / line) and POAF (blue symbols / line) cardiomyocytes. **B**, Examples of  $I_{Ca,L}$  inactivation (left) and quantification of relative  $I_{Ca,L}$  amplitude in Ctl (black line) and POAF (blue line; right) analyzed using a test pulse to 0 mV following a 300-ms inactivating pulse to the indicated potential. **C**, Midpoint of inactivation ( $V_{mid}$ ) obtained using a Boltzmann fit of the individual inactivation I-V curves in Ctl

365 and POAF cardiomyocytes. **D**, Fast and slow time constants of  $I_{Ca,L}$  inactivation obtained  
using a bi-exponential fit during a 200-ms depolarizing pulse to 0 mV in Ctl and POAF. **E**,  
Examples of  $I_{Ca,L}$  recovery from inactivation assessed using depolarizing pulses to 0 mV for  
different interpulse intervals at -80 mV. **F**, Quantification of relative  $I_{Ca,L}$  amplitude as function  
of interpulse interval in Ctl and POAF cardiomyocytes (**left**) and time constants of recovery  
370 from inactivation assessed using a mono-exponential fit of the individual recovery curves  
(**right**). N-numbers indicate numbers of cardiomyocytes/patients. \* $P < 0.05$  vs. Ctl based on  
multilevel models (panel **F**) or multilevel models with log-transformed data (panels **A,C** and  
**D**).

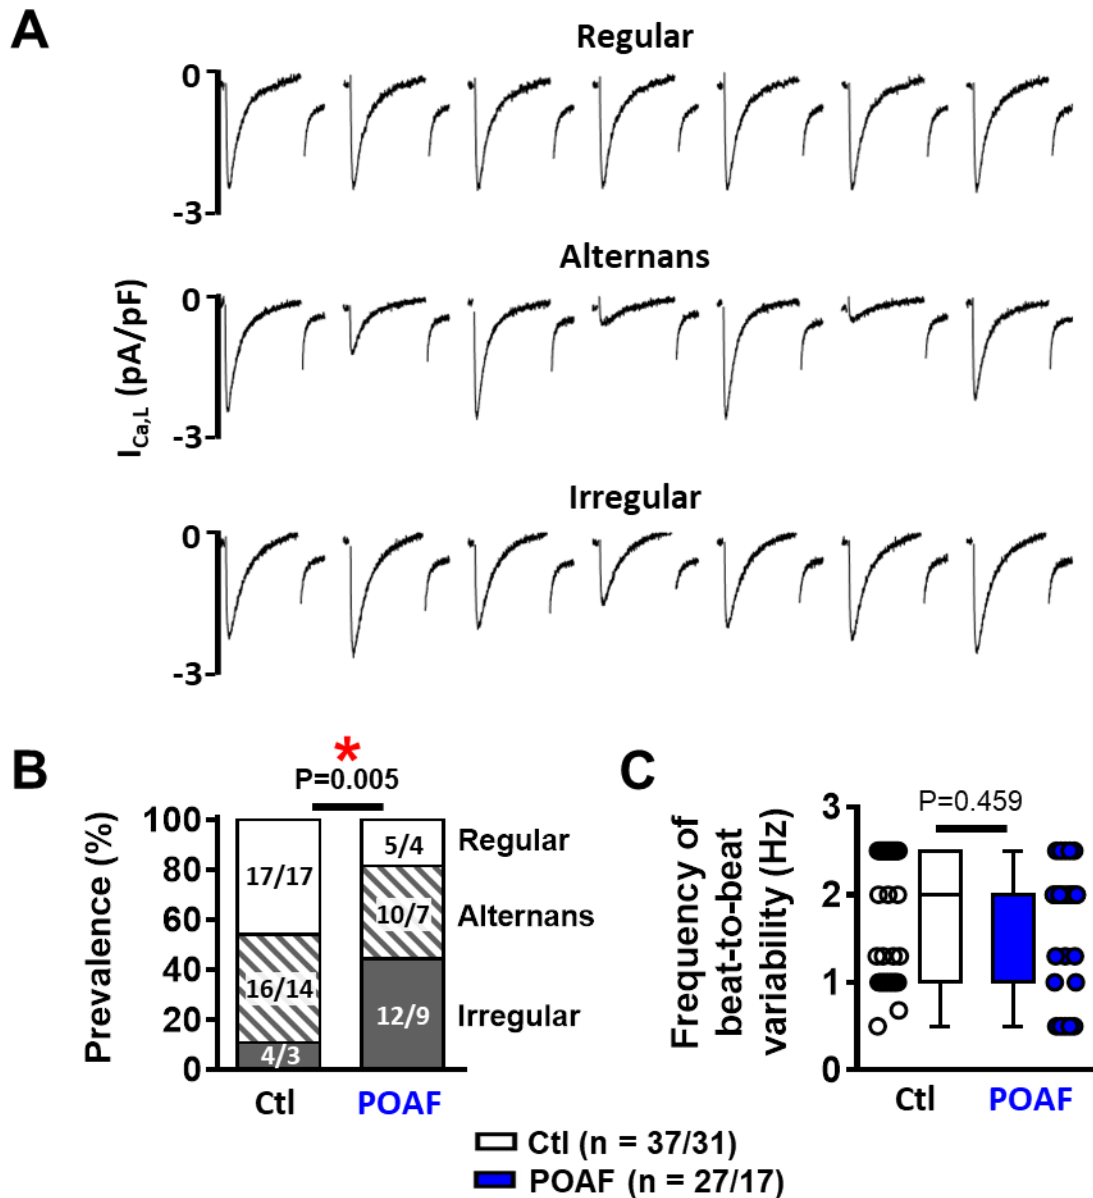

375

380

**Online Figure IV. L-type  $Ca^{2+}$  current ( $I_{Ca,L}$ ) alternans in POAF patients.** **A**, Examples of regular beat-to-beat  $I_{Ca,L}$  (**top**),  $I_{Ca,L}$  alternans (**middle**) and irregular beat-to-beat  $I_{Ca,L}$  alterations (**bottom**) recorded in perforated-patch experiments. **B**, Prevalence of regular, alternans and irregular  $I_{Ca,L}$  patterns. **C**, frequency at which beat-to-beat alterations developed (or the maximal frequency of 2.5-Hz if beat-to-beat patterns remained regular) in Ctl and POAF atrial cardiomyocytes. \* $P < 0.05$  vs. Ctl based on Chi-squared test (panel **B**) or multilevel models with log-transformed data (panel **C**).

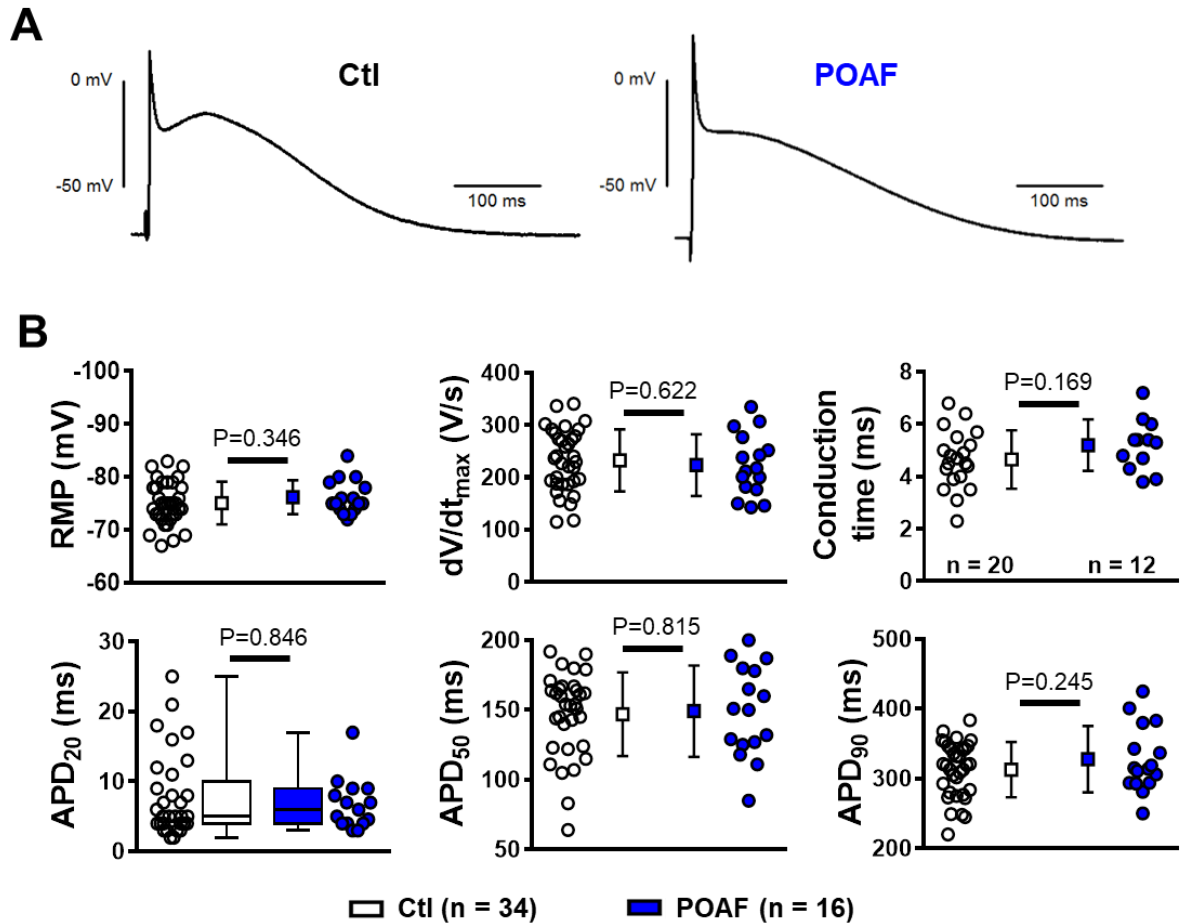

385 **Online Figure V. Electrical remodeling in Ctl and POAF patients. A,** Action potentials  
 (APs) at 1-Hz in atrial trabeculae. **B,** Quantification of AP characteristics in Ctl and POAF  
 trabeculae. **Top** row shows resting membrane potential (RMP), maximum upstroke velocity  
 ( $dV/dt_{max}$ ) and conduction time. **Bottom** row shows AP duration (APD) at 20%, 50% and 90%  
 of repolarization. P-values based on Mann-Whitney test for APD<sub>20</sub> and unpaired Student's *t*-  
 390 test for all other parameters.



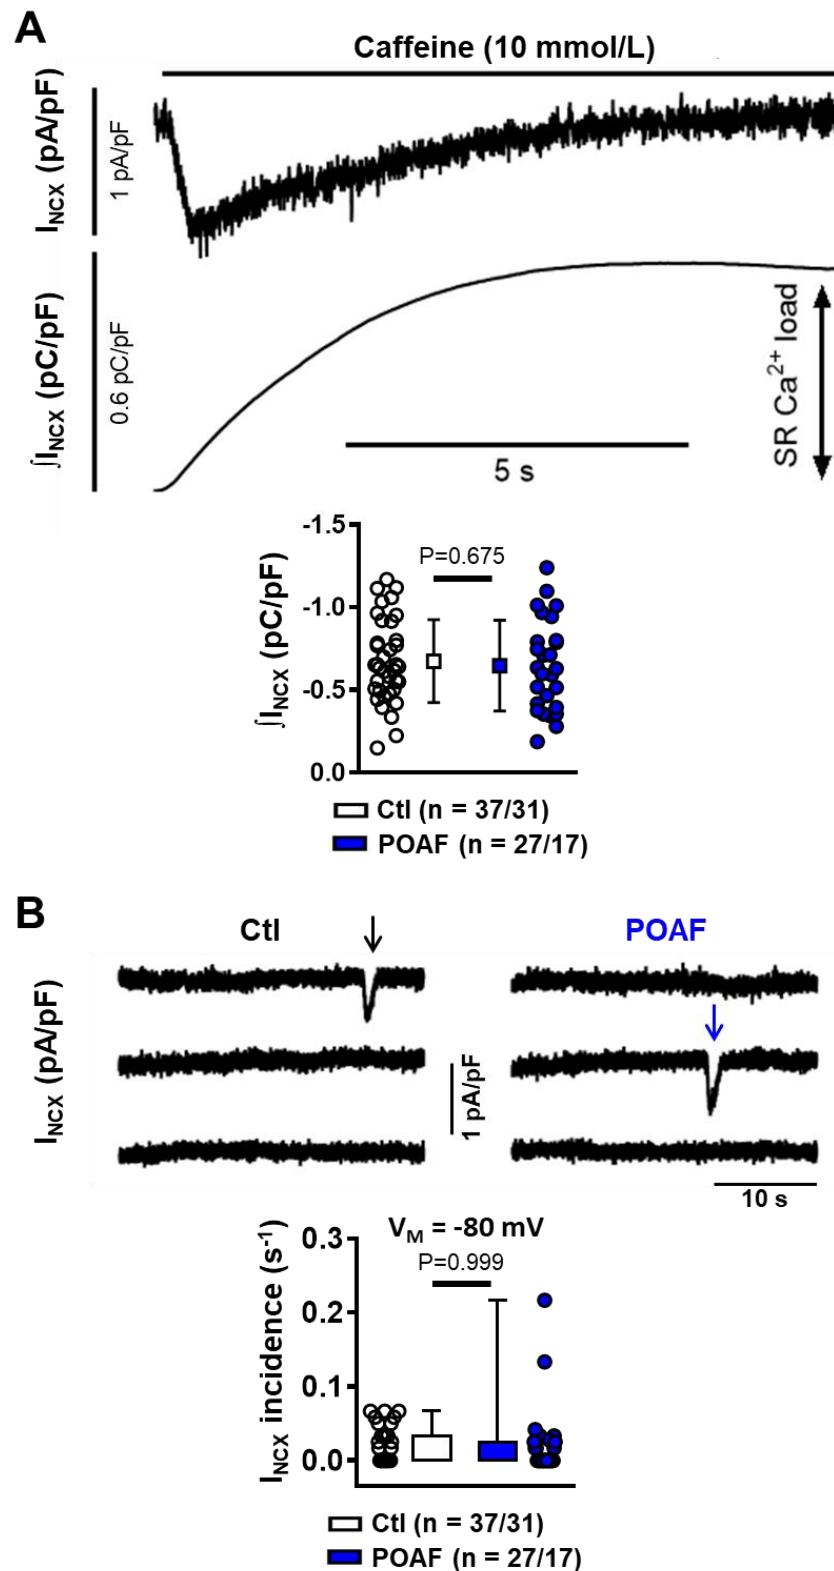

395

**Online Figure VI. Sarcoplasmic reticulum (SR)  $Ca^{2+}$  load and spontaneous SR  $Ca^{2+}$ -release event-mediated  $I_{NCX}$  in perforated-patch experiments. A,** Example of absolute and integrated caffeine-induced NCX-mediated inward current ( $I_{NCX}$ ; **top**) and SR  $Ca^{2+}$  load current ( $\int I_{NCX}$ ; **middle**) in Ctl and POAF cardiomyocytes. **B,** Examples of spontaneous  $I_{NCX}$  (indicated with arrows) in a Ctl (**left**) and POAF (**right**) cardiomyocyte at a holding potential of -80 mV, and incidence of  $I_{NCX}$  in Ctl and POAF cardiomyocytes at a holding potential of -80 mV (**bottom**). P-values based on multilevel models (**A**) or multilevel models with log-transformed data (**B**).

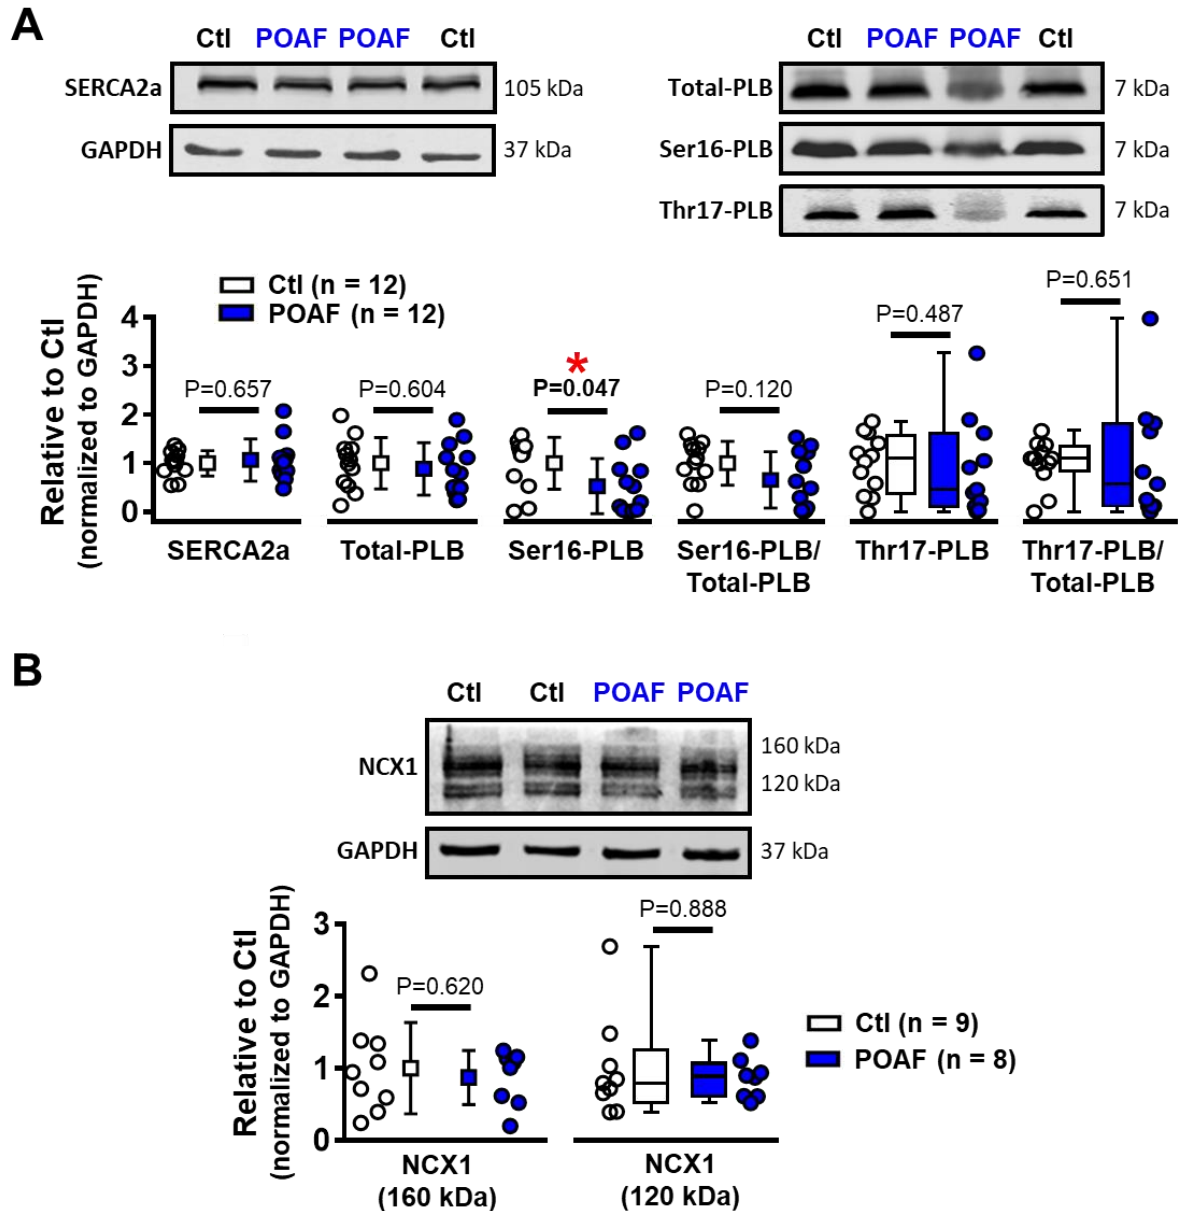

400

**Online Figure VII. Western-blot analysis of the sarcoplasmic reticulum  $\text{Ca}^{2+}$ -ATPase type-2a (SERCA2a) complex and  $\text{Na}^+/\text{Ca}^{2+}$ -exchanger type-1 (NCX1).** **A**, Example Western blots (**top**) and protein levels (**bottom**) of SERCA2a, total, Ser16-phosphorylated and Thr17-phosphorylated phospholamban (PLB) in Ctl and POAF. **B**, Example Western blots (**top**) and protein levels (**bottom**) of full-length (160 kDa) and proteolytic (120 kDa) fragment of NCX1. GAPDH was used as loading control. P-values based on Mann-Whitney test (Thr17-PLB, Thr17-PLB/Total-PLB, and 120 kDa NCX1) or unpaired Student's *t*-test (other proteins).

405

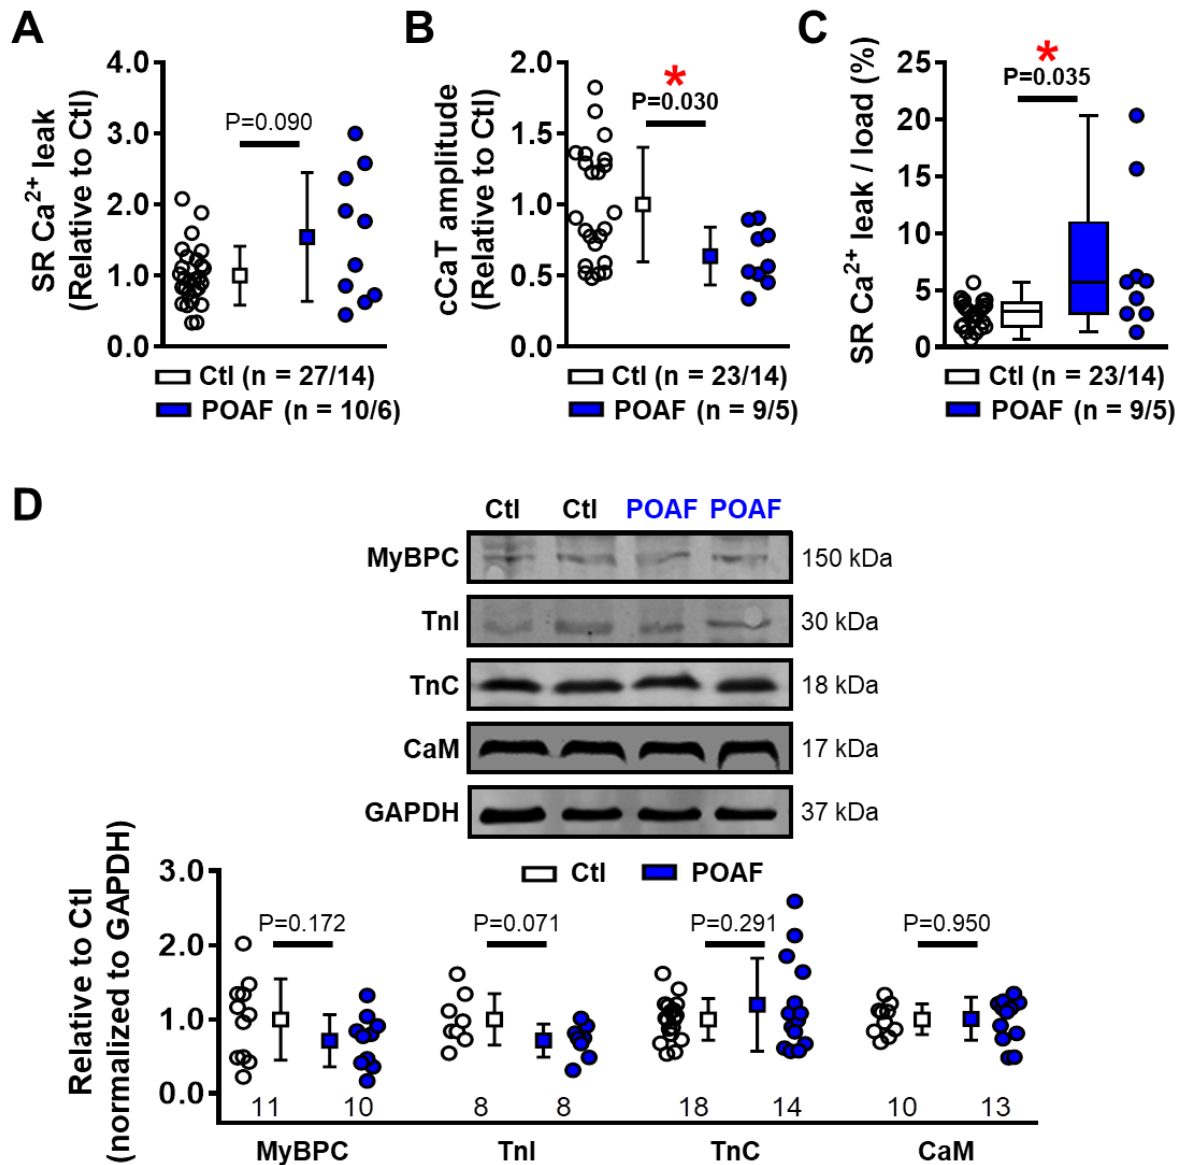

410

415

420

**Online Figure VIII. Assessment of sarcoplasmic reticulum (SR) Ca<sup>2+</sup> leak and Western-blot analysis of major Ca<sup>2+</sup>-buffering proteins.** **A**, Tetracaine (1-mmol/L)-induced decrease in fluorescence, which is proportional to SR Ca<sup>2+</sup>-leak, in POAF cardiomyocytes relative to Ctl. **B**, Amplitude of caffeine-induced Ca<sup>2+</sup>-transient (cCaT), a rough indicator of SR Ca<sup>2+</sup>-load, in POAF cardiomyocytes relative to Ctl. **C**, SR Ca<sup>2+</sup>-leak/SR Ca<sup>2+</sup>-load ratio in Ctl and POAF. **D**, Western blots (**top**) and protein levels (**bottom**) of the major Ca<sup>2+</sup> buffers cardiac myosin-binding protein-C (MyBPC), cardiac troponin-I (TnI), troponin-C (TnC) and calmodulin (CaM) in human atrial whole-tissue lysates. GAPDH was used as loading control. N-numbers indicate numbers of cardiomyocytes/patients (panels **A-C**) or patients (panel **D**). \*P<0.05 vs. Ctl based on multilevel models (**A, B**), multilevel models with log-transformed data (**C**), or unpaired Student's *t*-test (**D**), with Welch's correction for unequal variance for TnC.

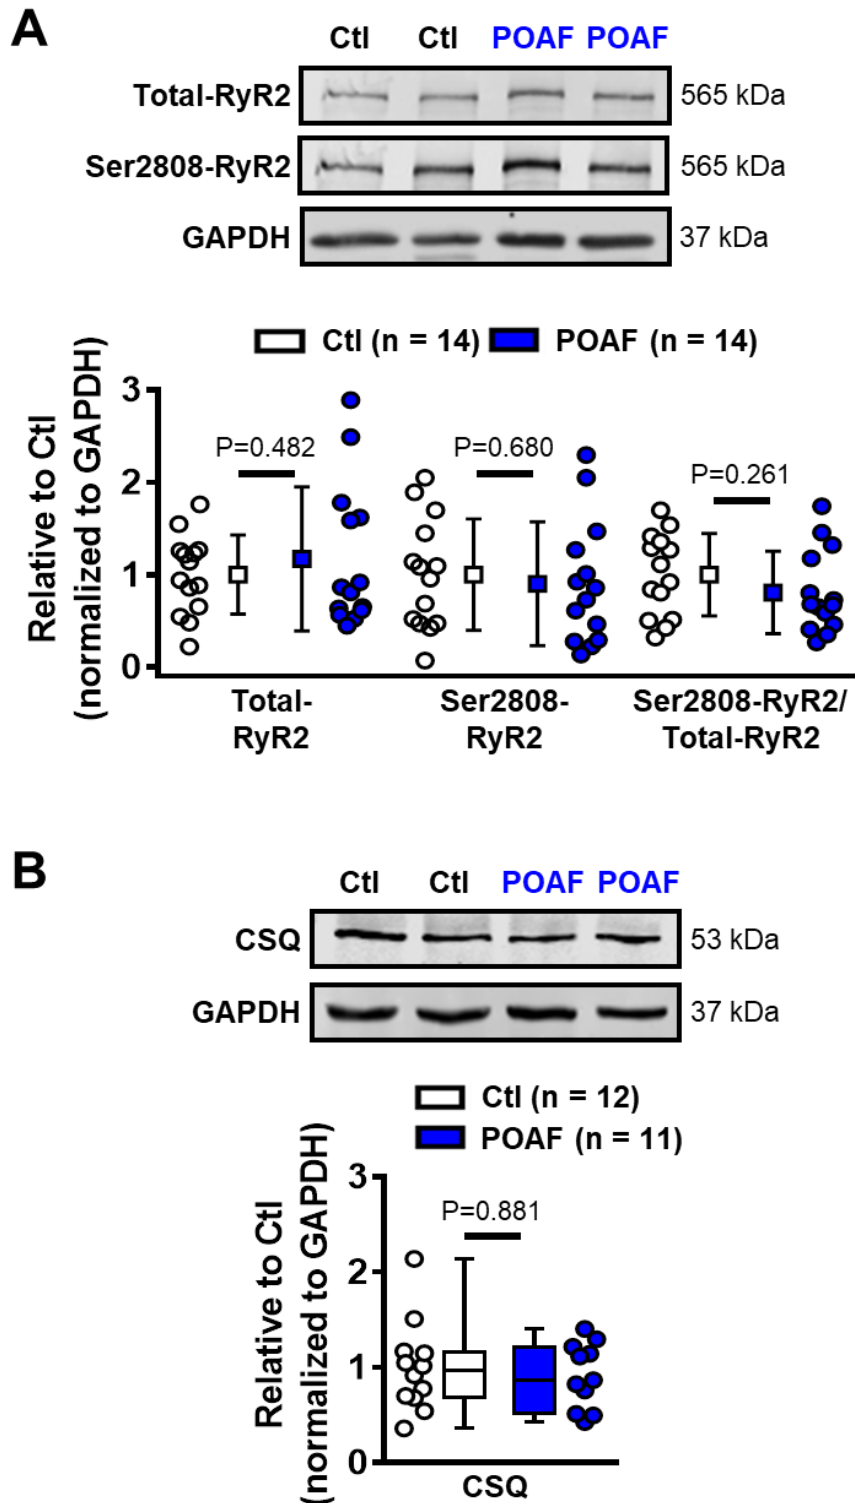

425 **Online Figure IX. Western-blot analysis of ryanodine receptor channel type-2 (RyR2)**  
**and calsequestrin (CSQ) regulation in Ctl and POAF patients. A,** Example Western blots  
**(top) and quantified protein levels (bottom) of total and Ser2808-phosphorylated RyR2. B,**  
**Western blots (top) and quantified protein levels (bottom) of the sarcoplasmic reticulum**  
**(SR) Ca<sup>2+</sup> buffer and RyR2-regulator CSQ. GAPDH was used as loading control. N-numbers**  
430 **indicate numbers of patients. P-values based on unpaired Student's *t*-test (A; with Welch's**  
**correction for unequal variance for Total-RyR2) or Mann-Whitney test (B).**

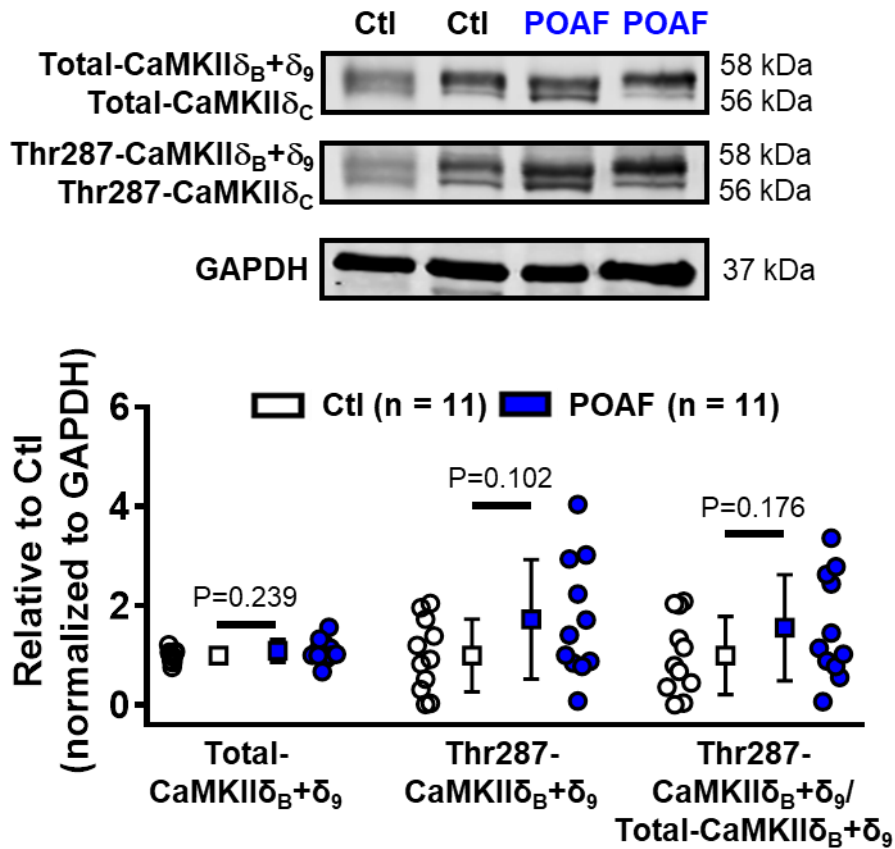

435 **Online Figure X. Western-blot analysis of Ca<sup>2+</sup>/calmodulin-dependent protein kinase-II $\delta$  (CaMKII $\delta$ ) regulation in Ctl and POAF patients.** Western blots of total and Thr287-  
 440 autophosphorylated levels of nuclear and cytosolic CaMKII $\delta$  (CaMKII $\delta_B+\delta_9$  and CaMKII $\delta_C$ , respectively; **top**) and quantification of total and Thr287-autophosphorylated CaMKII $\delta_B+\delta_9$  (**bottom**). GAPDH was used as loading control. N-numbers indicate numbers of patients. P-values based on unpaired Student's *t*-test.

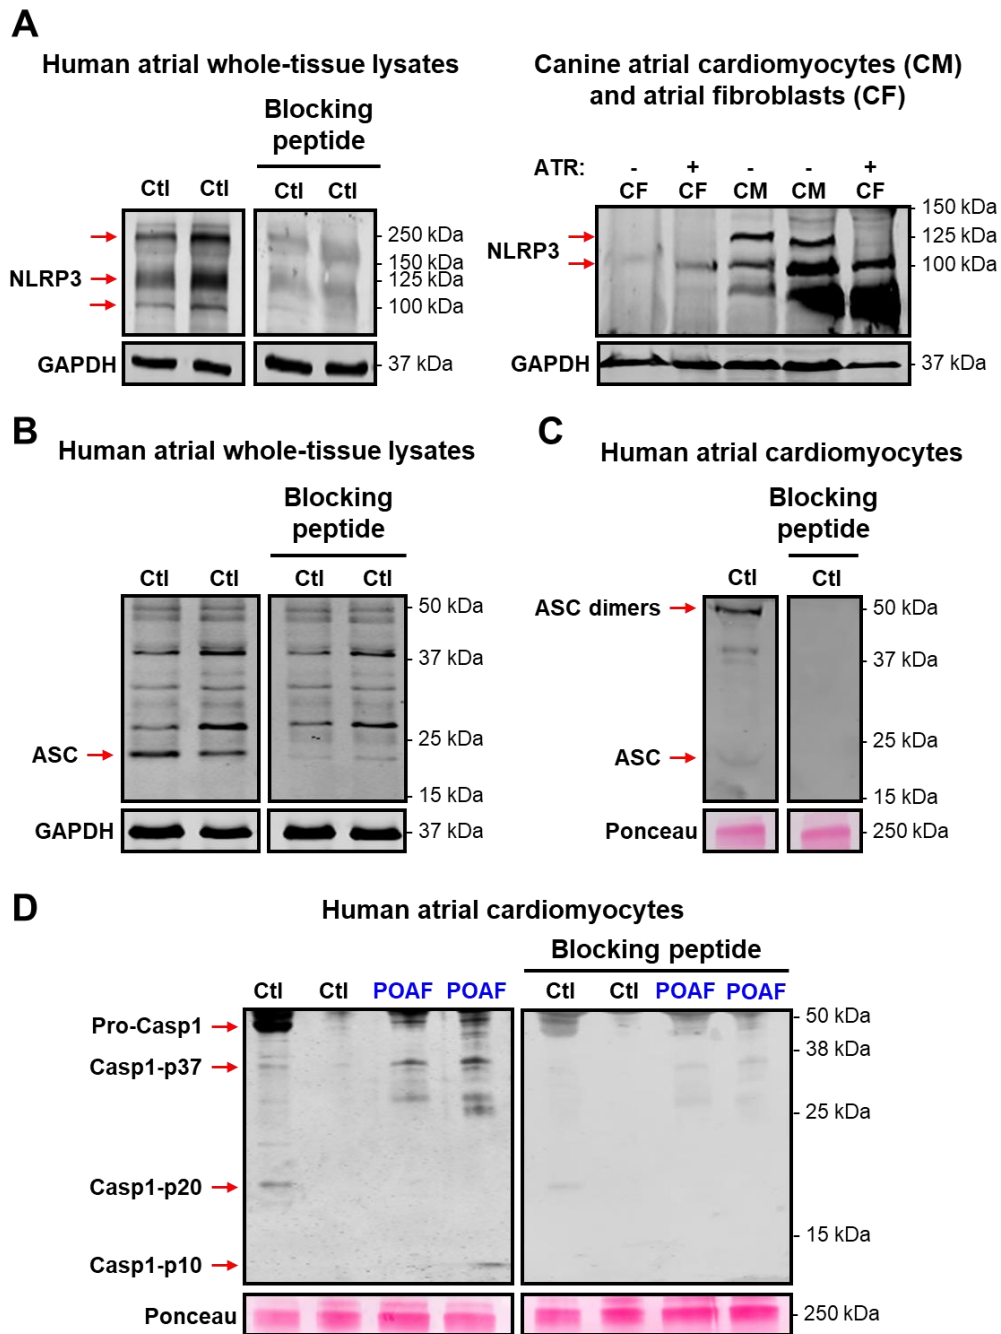

**Online Figure XI. Evaluation of antibodies against components of the atrial NACHT, LRR, and PYD domains containing protein 3 (NLRP3) inflammasome used in Western blot experiments.** **A**, Western blots in human atrial whole-tissue lysates of Ctl patients in the absence or presence of blocking peptide (left), as well as in canine atrial cardiomyocyte (CM) or cardiac fibroblast (CF) fractions of dogs with or without atrial tachycardia-related remodeling (ATR, 600 bpm for 2 weeks), identifying specific bands at ~125 kDa (full length) and ~100 kDa (a protein fragment lacking the LRR domain), respectively, as NLRP3.<sup>69</sup> Please note the absence of a ~125 kDa band in dog CFs. **B-C**, Western blots of ASC in the absence or presence of blocking peptide in human atrial whole-tissue lysates (**B**) or human atrial cardiomyocytes (**C**) of Ctl patients, identifying specific bands at ~24 kDa (monomers) and ~48 kDa (dimers), respectively. **D**, Western blots of Pro-caspase-1 (Pro-Casp1) and its cleaved products (Casp1-p37, Casp1-p20, and Casp1-p10) in human atrial cardiomyocytes of Ctl and POAF patients in the absence or presence of blocking peptide, showing specificity of the individual bands. GAPDH or total protein levels at 250 kDa (Ponceau staining) were used as loading control.

445

450

455

**A**

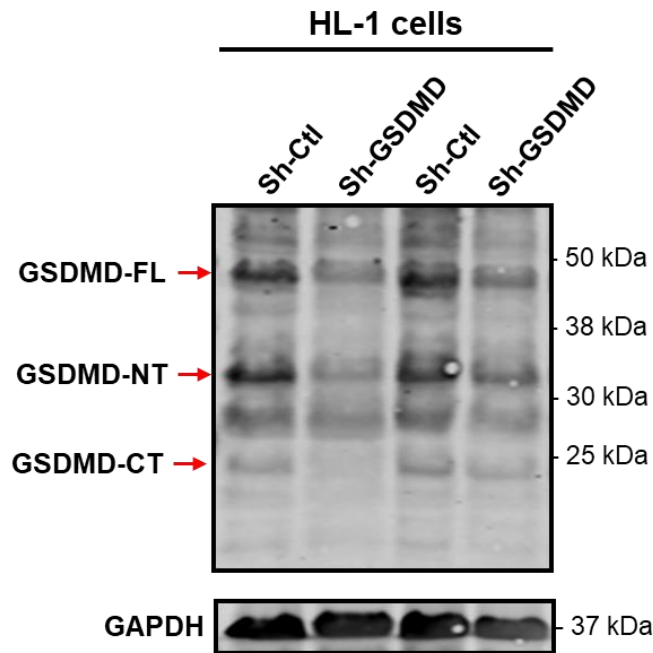

**B**

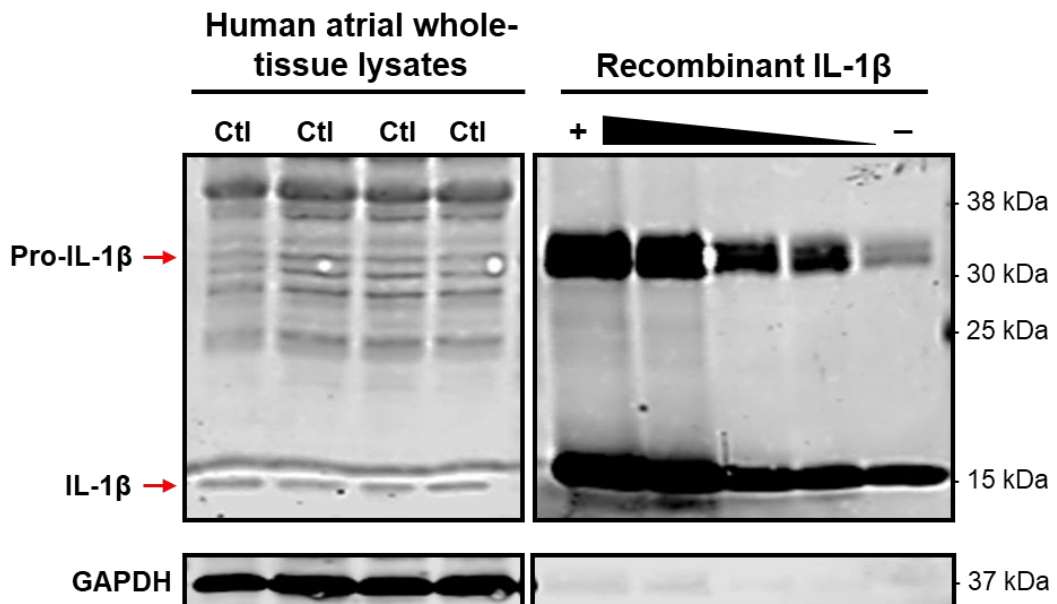

460 **Online Figure XII. Evaluation of antibodies against gasdermin-D (GSDMD) and (Pro-)interleukin-1 $\beta$  (IL-1 $\beta$ ) used in Western blot experiments. A,** Western blot showing GSDMD full-length (FL), as well as N-terminal (NT) and C-terminal (CT) fragments in HL-1 cells with control short-hairpin (sh) RNA or shRNA-mediated knockdown of GSDMD. The 3 GSDMD bands are strongly reduced or abolished with GSDMD knockdown, validating antibody and bands specificity. **B,** Western blots of (Pro-)IL-1 $\beta$  in human atrial whole-tissue lysates of Ctl patients (**left**) compared to different concentrations of recombinant IL-1 $\beta$  (**right**), showing the corresponding IL-1 $\beta$  bands. GAPDH was used as loading control.

465

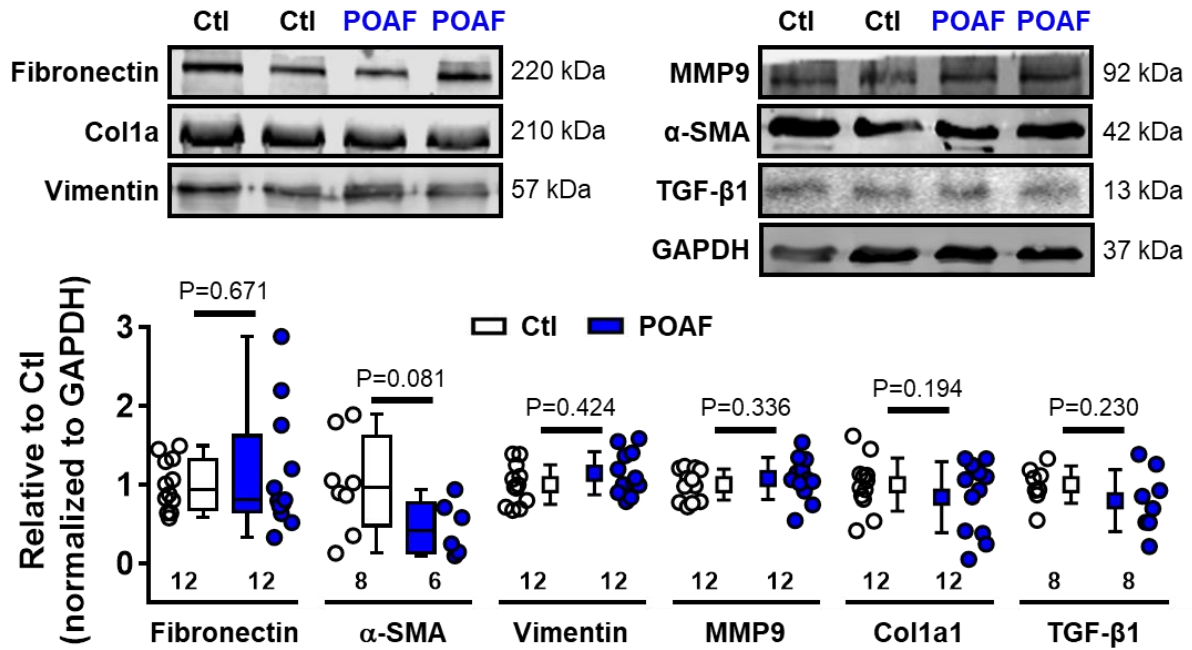

470

**Online Figure XIII. No indices of profibrotic remodeling in POAF patients.** Western blots (top) and quantified protein levels (bottom) of markers of profibrotic remodeling: fibronectin, α-smooth muscle actin (α-SMA), vimentin, collagen 1a1 (Col1a1), matrix metalloproteinase type-9 (MMP9), and transforming growth factor-β1 (TGF-β1). GAPDH was used as loading control. Numbers below symbols indicate number of atrial samples. P-values based on Mann-Whitney test (fibronectin, α-SMA) or unpaired Student's *t*-test (vimentin, MMP9, Col1a1, TGF-β1).

475



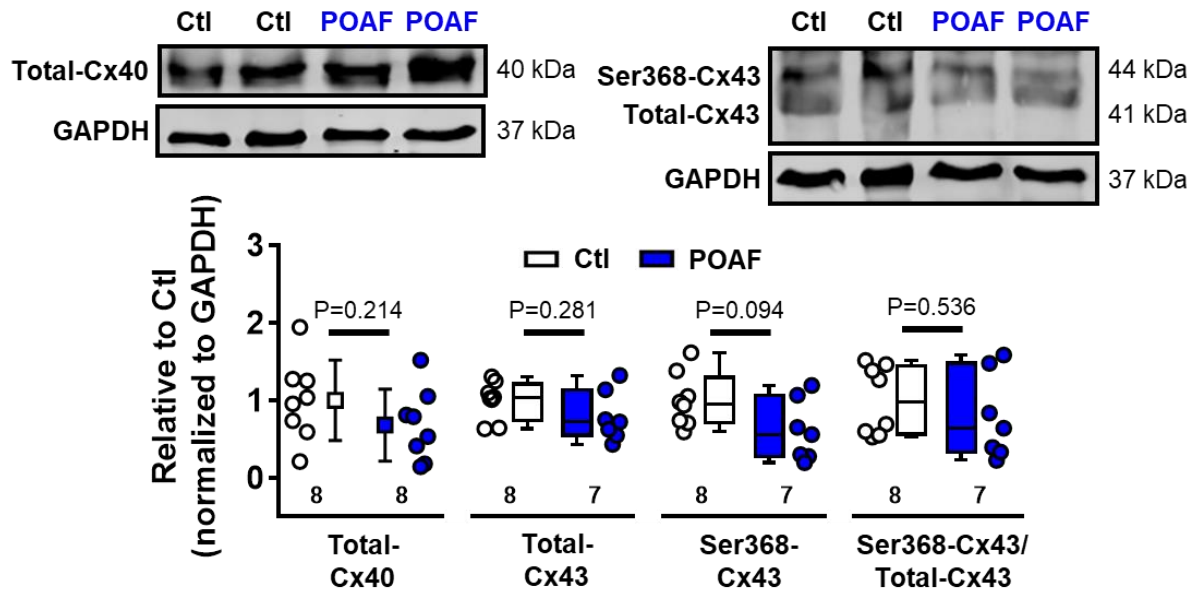

480 **Online Figure XIV. No indices of connexin remodeling in POAF patients.** Western blots (top) and quantified protein levels (bottom) of total connexin-40 (Cx40), as well as total and Ser368-phosphorylated connexin-43 (Cx43). GAPDH was used as loading control. Numbers below symbols indicate number of atrial samples. P-values based on Mann-Whitney test (Total-Cx40) or unpaired Student's *t*-test (Total-Cx43 Ser368-Cx43 and Ser368-Cx43/Total-Cx43).

485

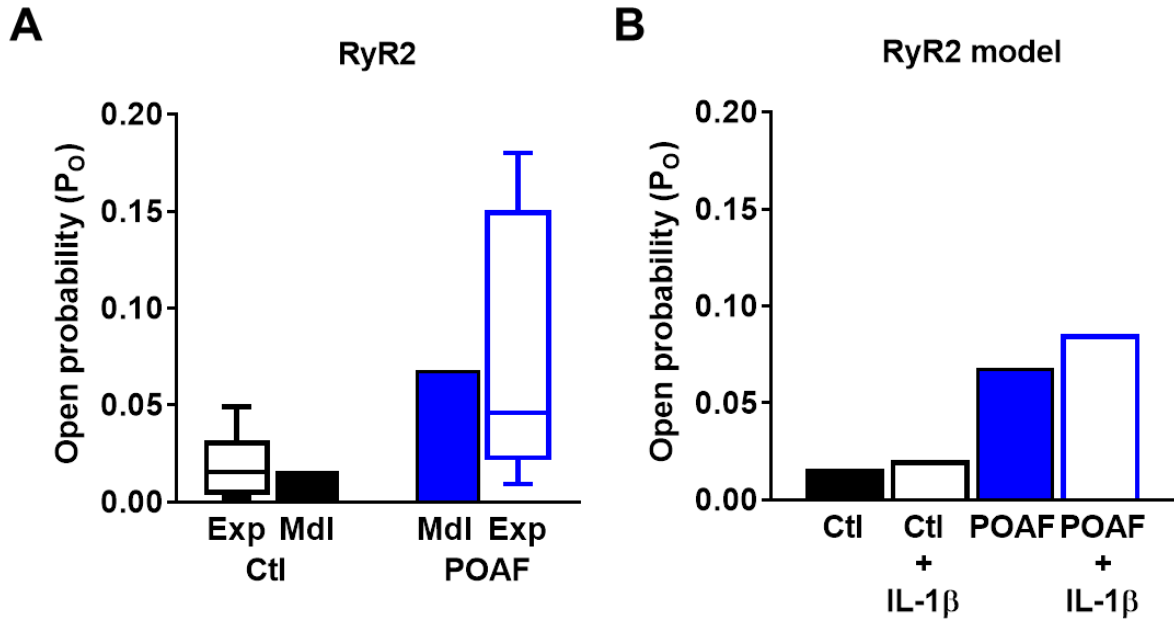

**Online Figure XV. Simulated single-channel properties of ryanodine receptor channel type-2 (RyR2) in Ctl and POAF model variants.** **A**, Comparison of simulated RyR2 single-channel open probability in Ctl and POAF models with experimental data from [Figure 4A](#) under diastole-like conditions (150-nmol/L free cytosolic  $Ca^{2+}$ ). **B**, Comparison of RyR2 open probability in Ctl and POAF in the absence or presence of simulated IL-1 $\beta$  application. Simulated effects of IL-1 $\beta$  included a 25% increase in RyR2 open probability based on experimental data showing increased  $Ca^{2+}$ -spark frequency during IL-1 $\beta$  application.<sup>30</sup>

490

495

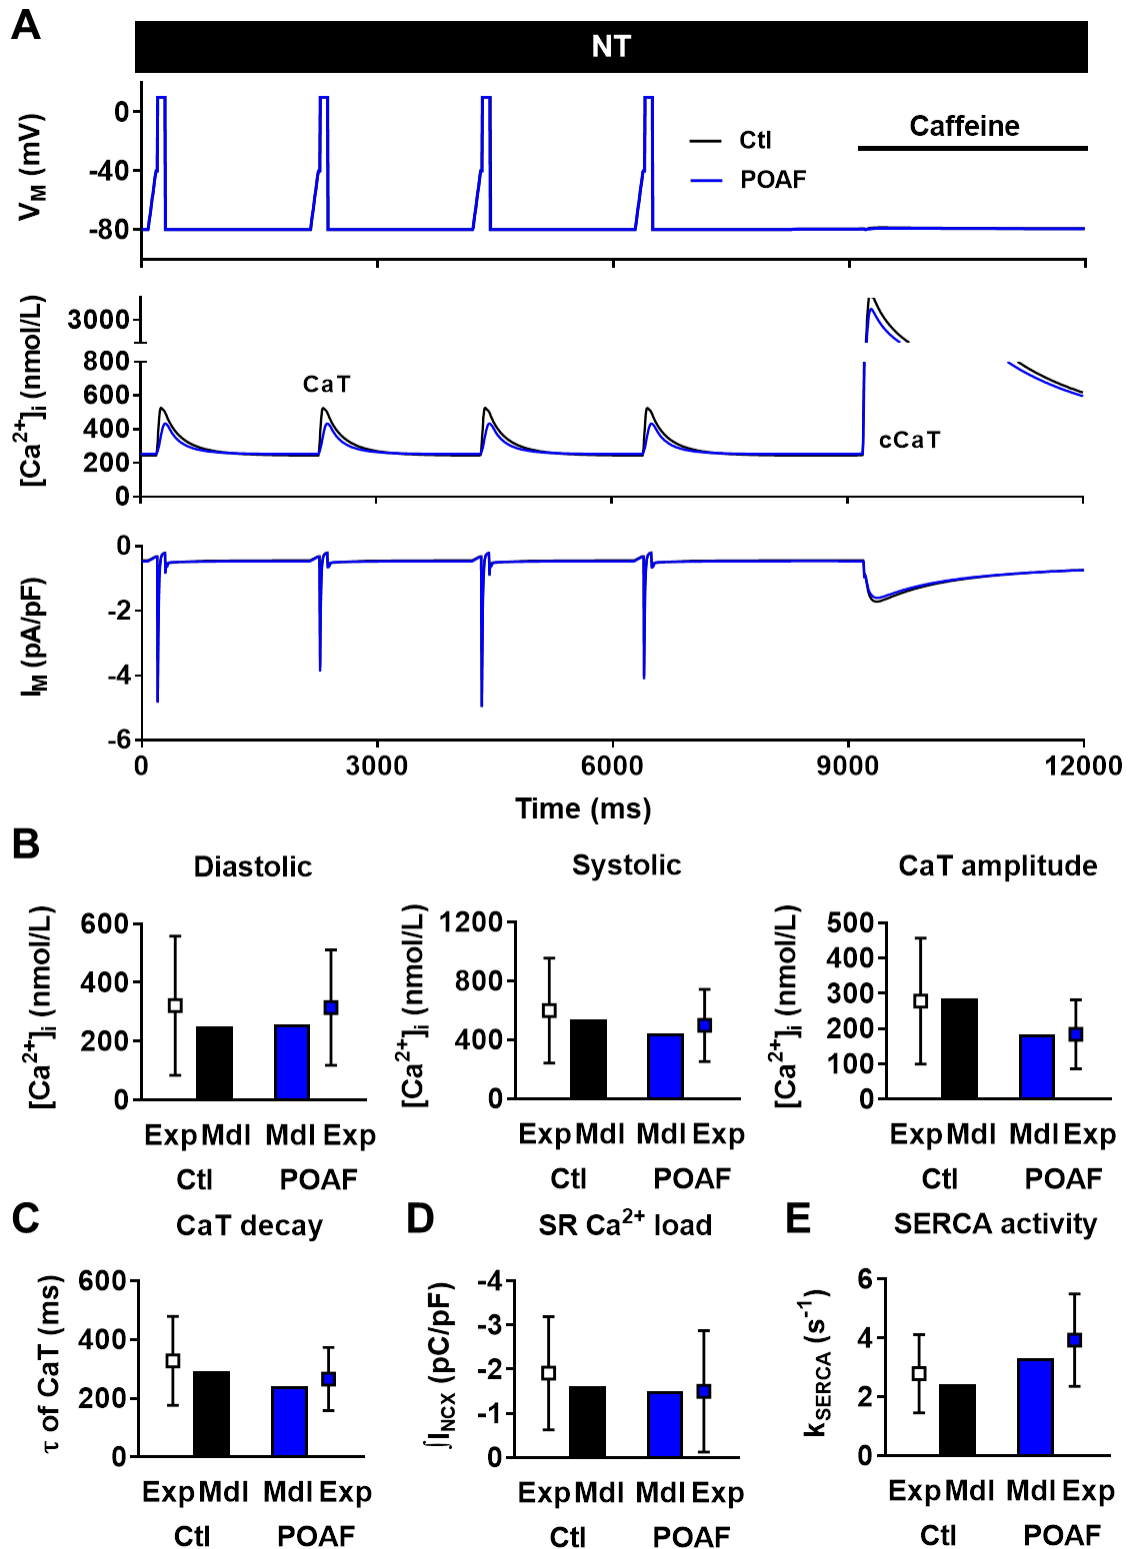

**Online Figure XVI. Validation of computational models.** **A**, Simulated voltage-clamp protocol (top), whole-cell  $\text{Ca}^{2+}$  transient (CaT, middle) and total membrane current (bottom) in Ctl and POAF model variants. **B-E**, Comparison of diastolic and systolic  $\text{Ca}^{2+}$  levels, and CaT amplitude (**B**), time constant ( $\tau$ ) of CaT decay (**C**), sarcoplasmic reticulum (SR)  $\text{Ca}^{2+}$  load measured as integrated NCX current ( $I_{\text{NCX}}$ ) during the caffeine-induced CaT (cCaT, **D**), and SERCA activity estimated as the difference in decay rates between the CaT and cCaT (**E**), in Ctl and POAF model variants (bars) with experimental data (symbols).

500

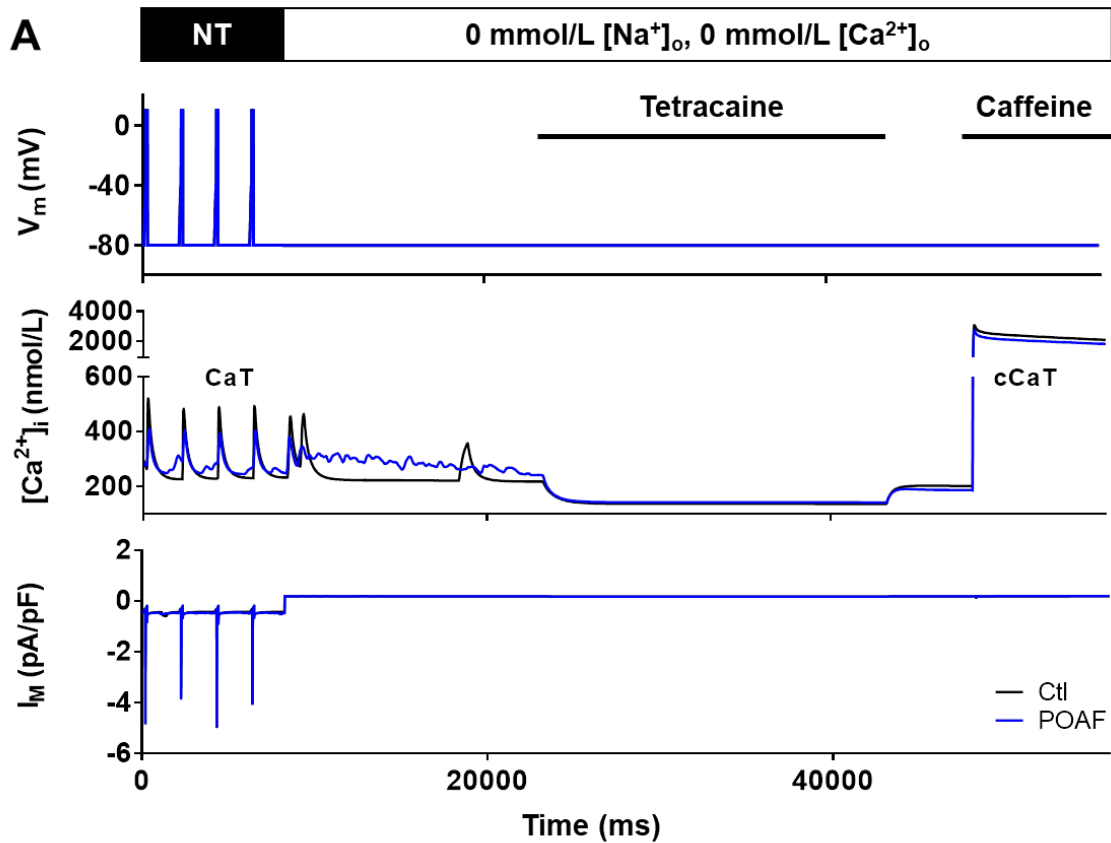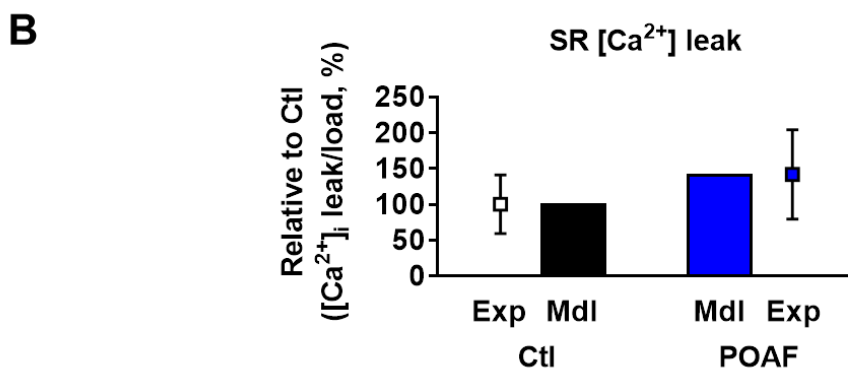

505

**Online Figure XVII. Simulated sarcoplasmic reticulum (SR) Ca<sup>2+</sup> leak protocol in Ctl and POAF model variants.** **A**, Voltage-clamp protocol (**top**), whole-cell Ca<sup>2+</sup> (**middle**) and membrane current (**bottom**) during simulated application of the Shannon protocol<sup>8</sup> to measure SR Ca<sup>2+</sup>-leak and SR Ca<sup>2+</sup>-load. The effects of tetracaine and caffeine were simulated by blocking RyR2 by >99% and setting RyR2 open probability to 1.0, respectively. SR Ca<sup>2+</sup>-leak was quantified as the decrease in cytosolic Ca<sup>2+</sup> during tetracaine application and SR Ca<sup>2+</sup>-load was quantified as the amplitude of the caffeine-induced Ca<sup>2+</sup> transient (CaT). **B**, Relative (load normalized) SR Ca<sup>2+</sup>-leak in Ctl and POAF compared to experimental data from [Figure 3A](#).

515

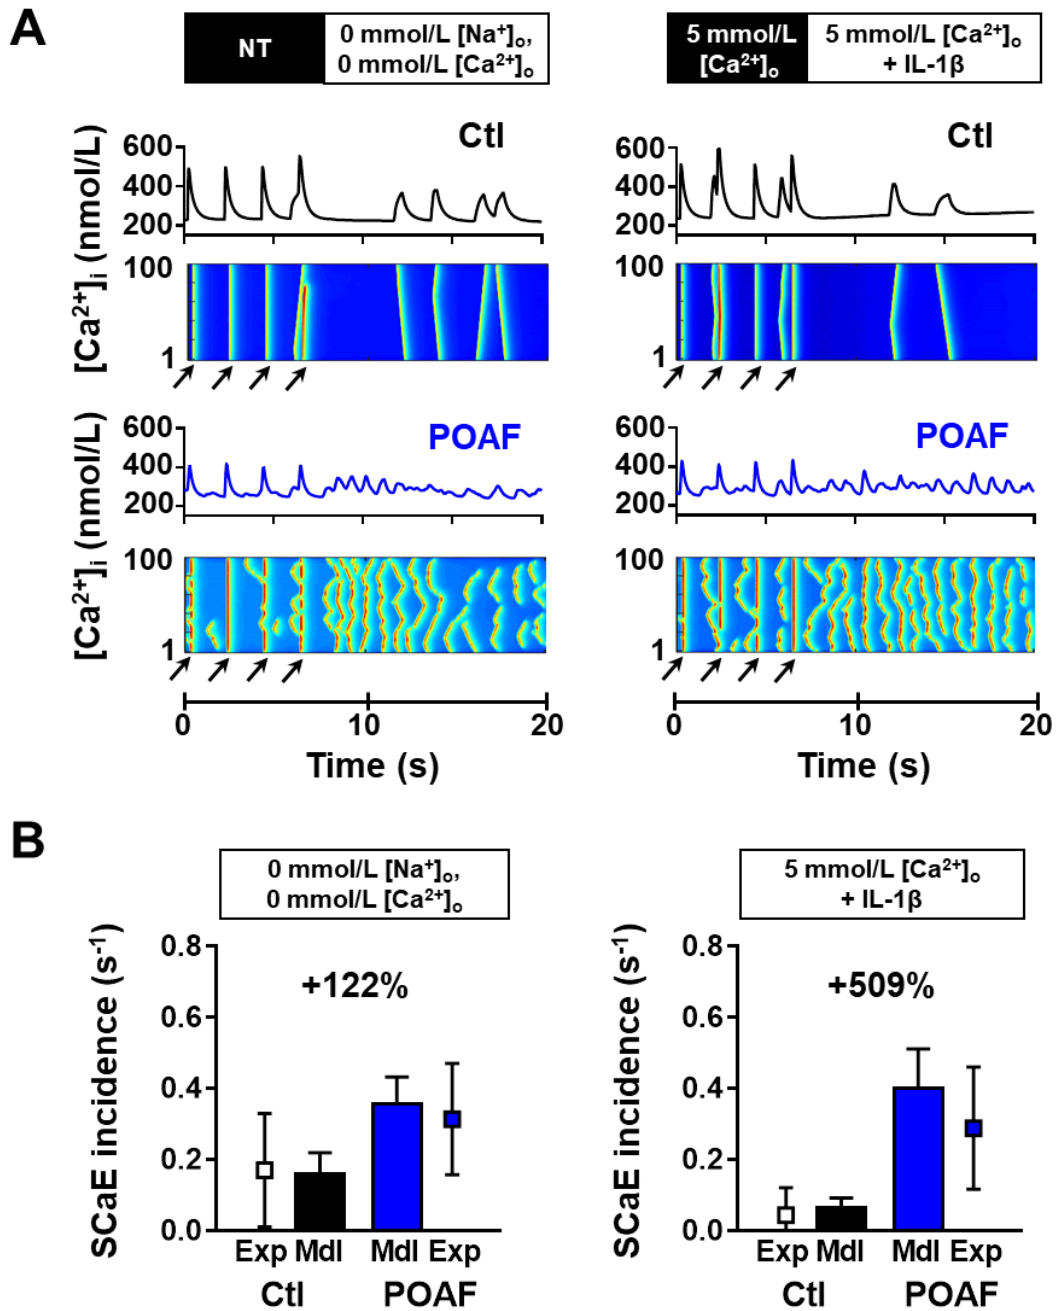

**Online Figure XVIII. Simulated sarcoplasmic reticulum (SR) Ca<sup>2+</sup>-release events (SCaEs) in Ctl and POAF model variants under different conditions. A, Whole-cell Ca<sup>2+</sup>-transient (CaT) and longitudinal line-scan of depolarization-induced CaTs (arrows) or SCaEs in Ctl (top row) and POAF (bottom row) models under voltage-clamp conditions with 0-mmol/L Na<sup>+</sup>/0-mmol/L Ca<sup>2+</sup> (left; experimental conditions in [Figure 3B-C](#)) or 5-mmol/L Ca<sup>2+</sup> followed by acute application of IL-1β (experimental conditions in [Figure 7B-D](#)). B, Validation of SCaE-incidence in both model variants (bars) compared to experimental data obtained under the same condition (symbols).**

520

525

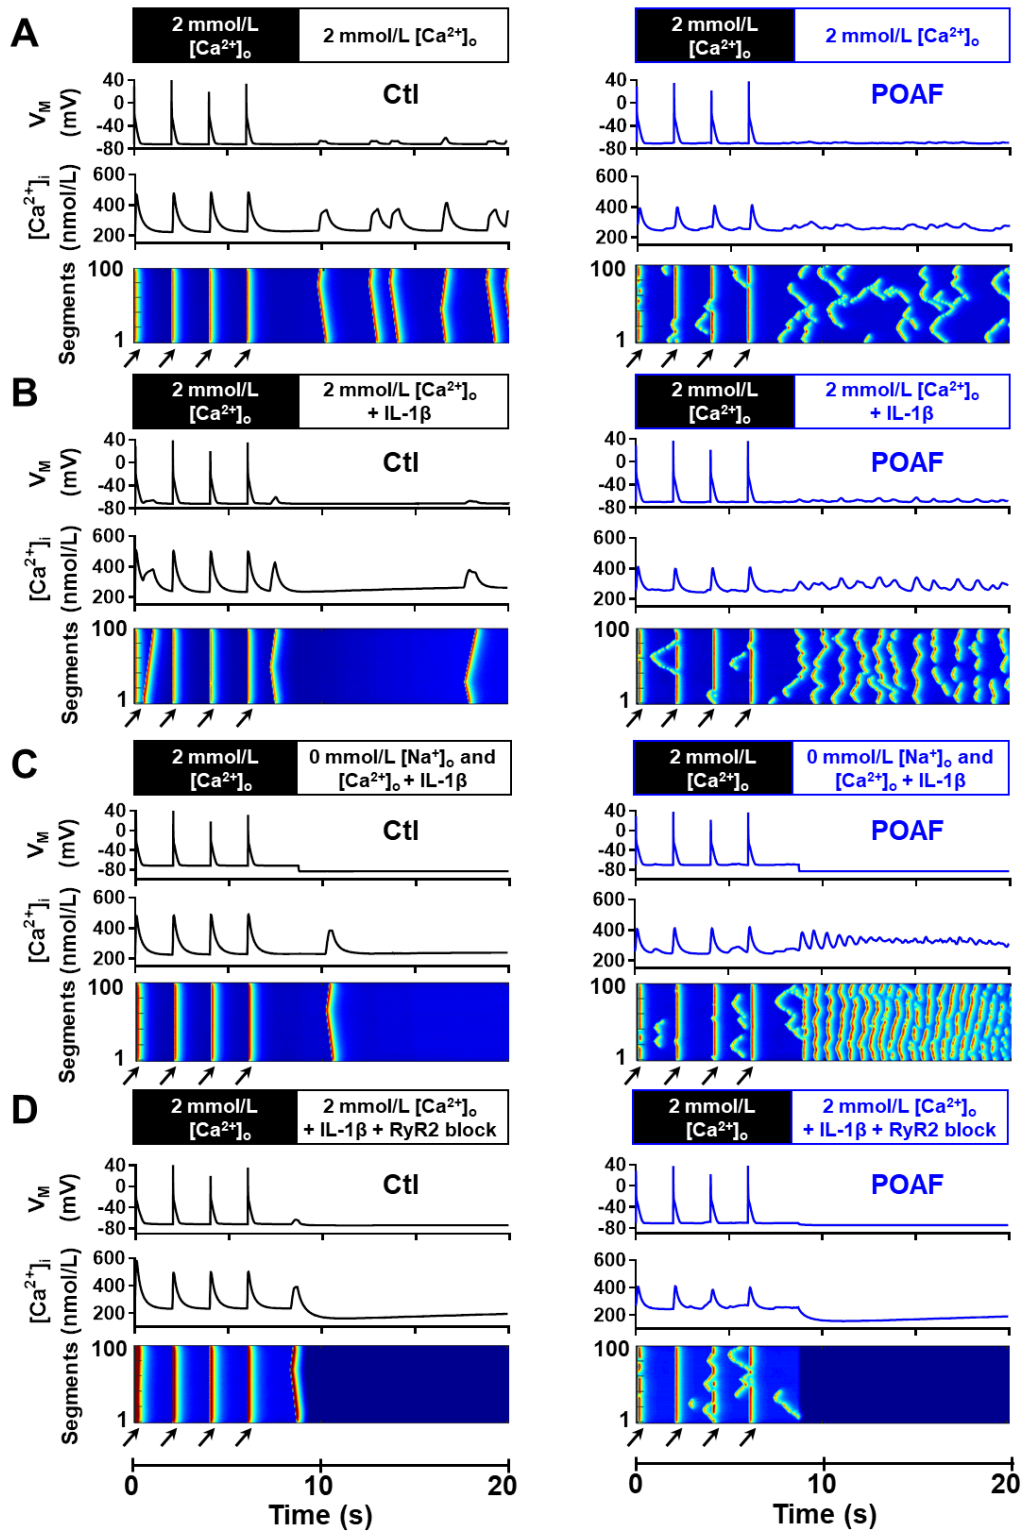

Online Figure XIX. Current-clamp simulations during 0.5-Hz pacing (arrows) and post-pacing follow-up period to assess spontaneous sarcoplasmic reticulum  $\text{Ca}^{2+}$ -release events (SCaEs) and corresponding delayed afterdepolarizations (DADs) in the Ctl (left) and POAF (right) model variants. **A**, Membrane potential ( $V_M$ , top), whole-cell  $\text{Ca}^{2+}$ -transient (middle) and longitudinal line scan through the center of the virtual cardiomyocyte (bottom) under control conditions (2-mmol/L extracellular  $\text{Ca}^{2+}$ ). **B**, Similar to panel A in the presence of simulated IL-1 $\beta$  application during the follow-up. **C**, Similar to panel B, but in the absence of extracellular  $\text{Na}^+$  and  $\text{Ca}^{2+}$  to inhibit transmembrane  $\text{Ca}^{2+}$  fluxes. **D**, Similar to panel B with inhibition of ryanodine receptor channel type-2 (RyR2)-mediated  $\text{Ca}^{2+}$  release.

530

535

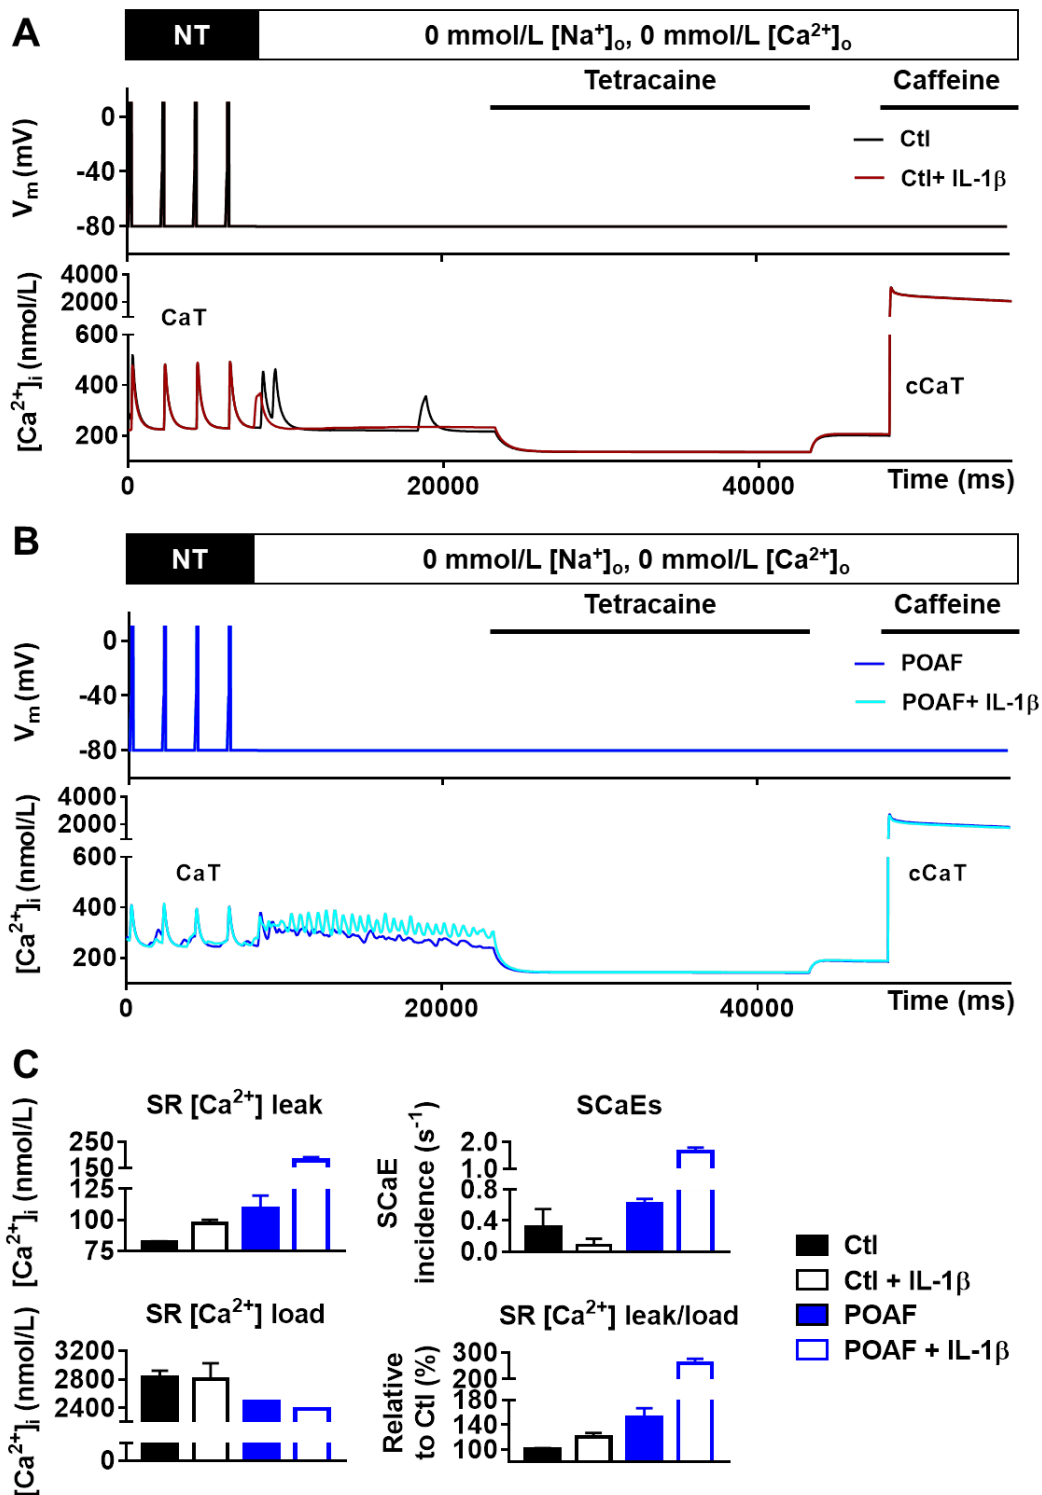

Online Figure XX. Simulated sarcoplasmic reticulum (SR) Ca<sup>2+</sup>-leak protocol in the absence or presence of interleukin-1β (IL-1β) stimulation. **A**, Voltage-clamp protocol (top) and whole-cell Ca<sup>2+</sup> (bottom) during simulated application of the Shannon protocol<sup>36</sup> to measure SR Ca<sup>2+</sup>-leak and SR Ca<sup>2+</sup>-load in the Ctl model in the absence (black line) or presence (red line) of IL-1β. The effects of tetracaine and caffeine were simulated by blocking RyR2 by more than 99% and setting RyR2 open probability to 1.0, respectively. **B**, Similar to panel A for the POAF model version. **C, Top**: Quantification of SR Ca<sup>2+</sup>-leak and incidence of spontaneous SR Ca<sup>2+</sup>-release events (SCaEs). **Bottom**: SR Ca<sup>2+</sup>-load (amplitude of the caffeine-induced Ca<sup>2+</sup> transient, CaT) and SR Ca<sup>2+</sup>-leak/load in Ctl and POAF with and without IL-1β stimulation.

540

545

## Conceptual model for POAF

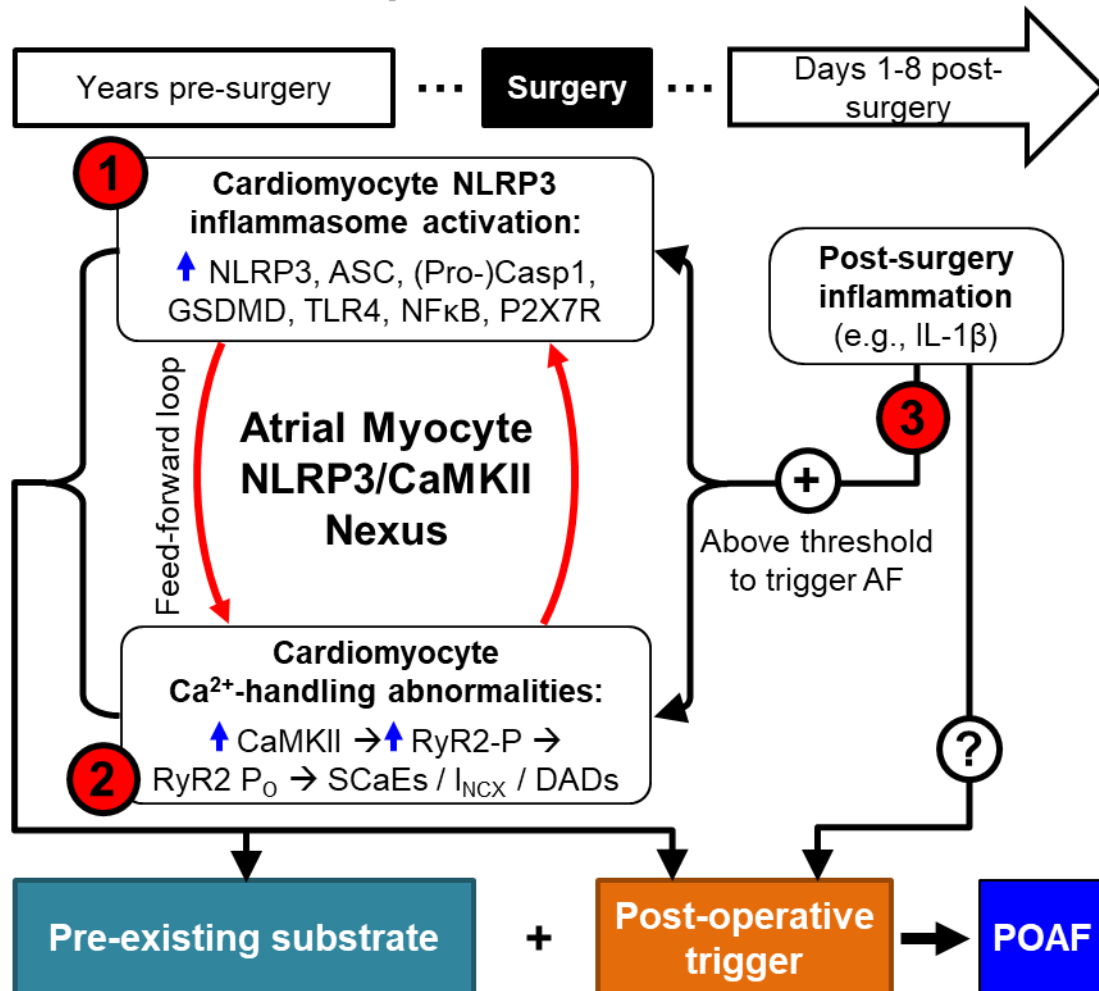

**Online Figure XXI. Major findings and conceptual model for post-operative atrial fibrillation (POAF).** Patients that go on to develop POAF have a pre-existing substrate characterized by (1) Increased cardiomyocyte NLRP3-inflammasome activation and (2) CaMKII-dependent, RyR2-mediated cardiomyocyte Ca<sup>2+</sup>-handling abnormalities. In addition, (3) post-surgery inflammation (e.g., acute IL-1β releases) further activates the atrial NLRP3-inflammasome and exacerbates CaMKII-dependent Ca<sup>2+</sup>-handling abnormalities. Taken together, these data support a novel model in which the post-surgical IL-1β-induced increases in phosphorylation levels of Ca<sup>2+</sup>-handling proteins exacerbate the pre-existing SR dysfunction, reaching a value above the threshold needed to cause potentially proarrhythmic SCaEs and DADs that might predispose to POAF development. These observations provide a unifying model of AF that accounts for the high long-term AF recurrence-rate in POAF patients as well as the transient occurrence of POAF post-operatively.

550

555

560



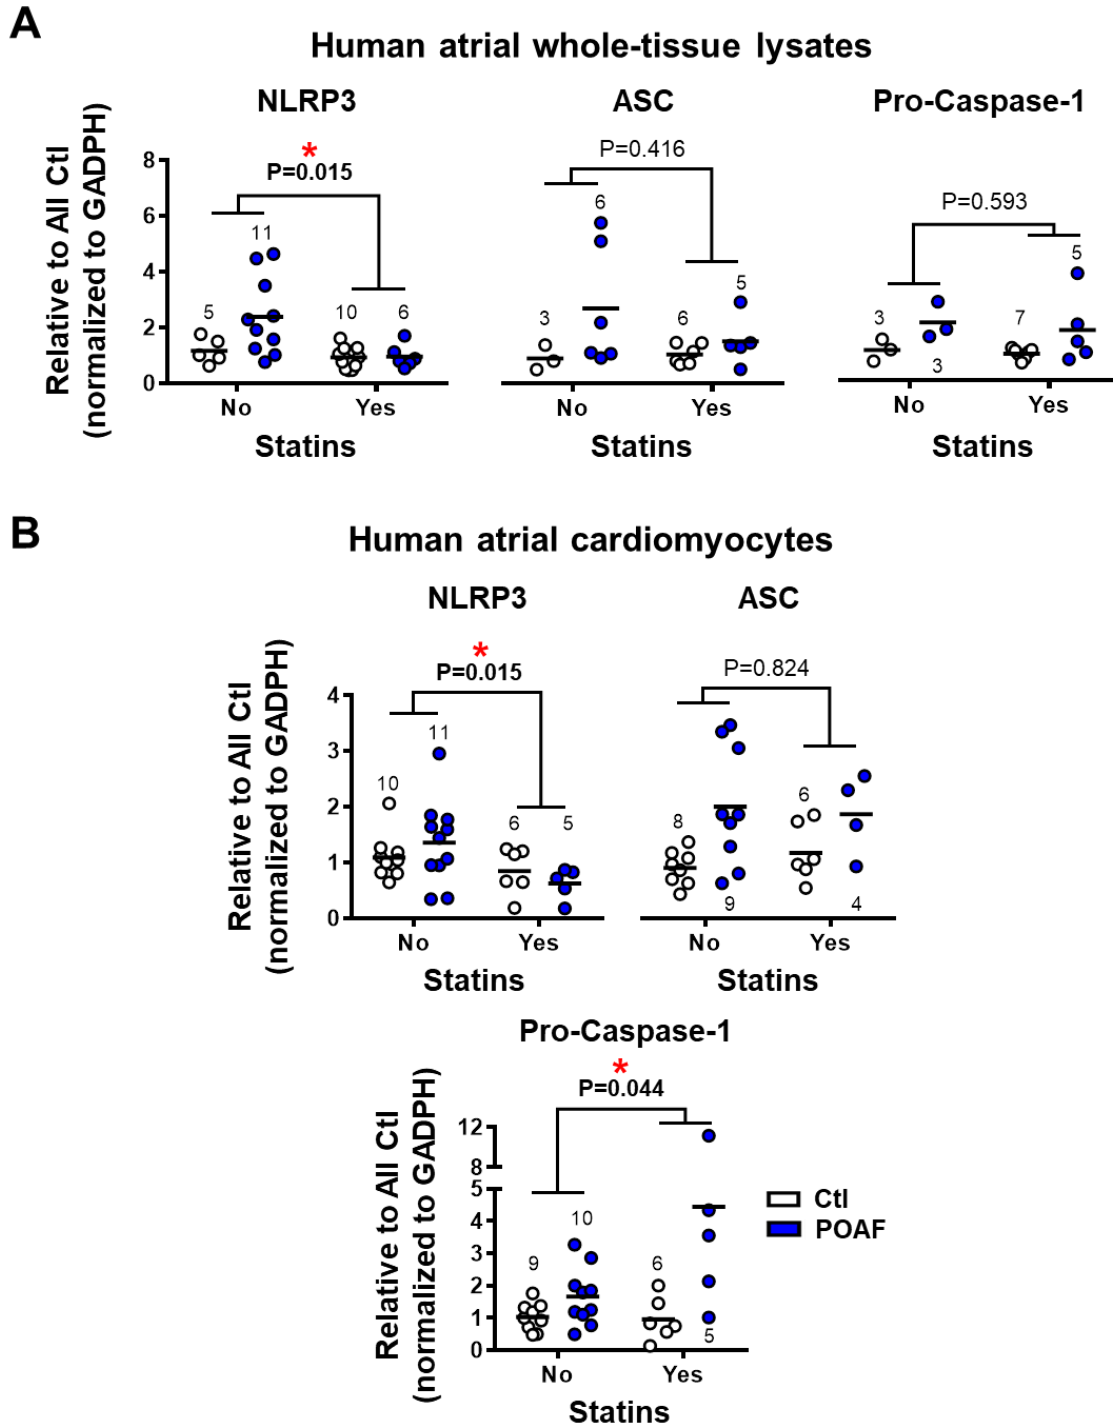

**Online Figure XXII. Dependence of atrial NACHT, LRR, and PYD domains containing protein-3 (NLRP3) inflammasome components on statin use and post-operative rhythm.** Protein levels of NLRP3, apoptosis-associated speck-like protein containing a CARD (ASC), and Pro-caspase-1 in atrial whole-tissue lysates (**A**) or human atrial cardiomyocytes (**B**) of Ctl and POAF patients who did (Yes) or did not (No) use lipid-lowering drugs. Numbers above or below symbols indicate number of patients. \* $P < 0.05$  for the factor 'statin use' based on two-way ANOVA. Note that individual subgroups may be small, limiting the statistical power and robustness of these subanalyses.

565

570

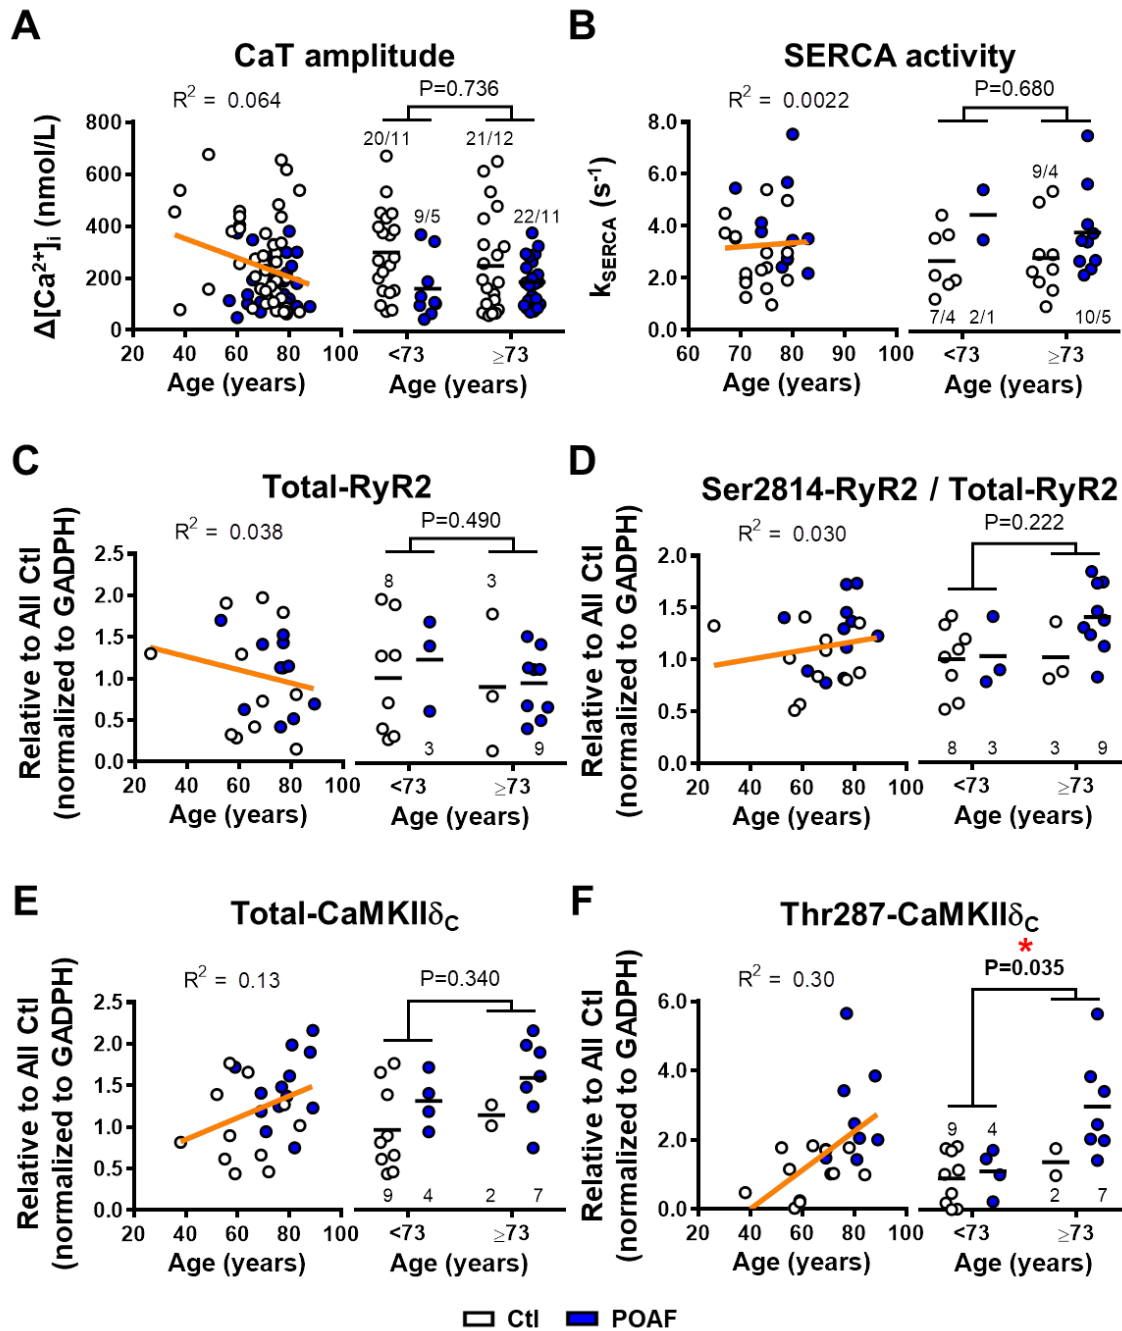

**Online Figure XXIII. Age and rhythm dependence of Ca<sup>2+</sup>-handling parameters.**

Correlation between parameter value and age, with corresponding correlation coefficients ( $R^2$ ; **left**) and parameter values in Ctl and POAF patients <73 years vs. ≥73 years (**right**). **A**, Ca<sup>2+</sup>-transient (CaT) amplitude. **B**, Sarcoplasmic reticulum Ca<sup>2+</sup>-ATPase (SERCA) activity. **C**, Total ryanodine receptor channel type-2 (RyR2) protein levels. **D**, Relative Ser2814-RyR2 phosphorylation levels. **E**, Total cytosolic Ca<sup>2+</sup>/calmodulin-dependent protein kinase-II $\delta$  (CaMKII $\delta_C$ ) protein levels. **F**, CaMKII $\delta_C$  autophosphorylation levels at Thr287. Numbers above or below symbols indicate number of cardiomyocytes/patients (panels **A-B**) or patients (panels **C-F**). \* $P < 0.05$  for the factor 'age' based on two-way ANOVA. Note that individual subgroups may be small, limiting the statistical power and robustness of these subanalyses.

575

580

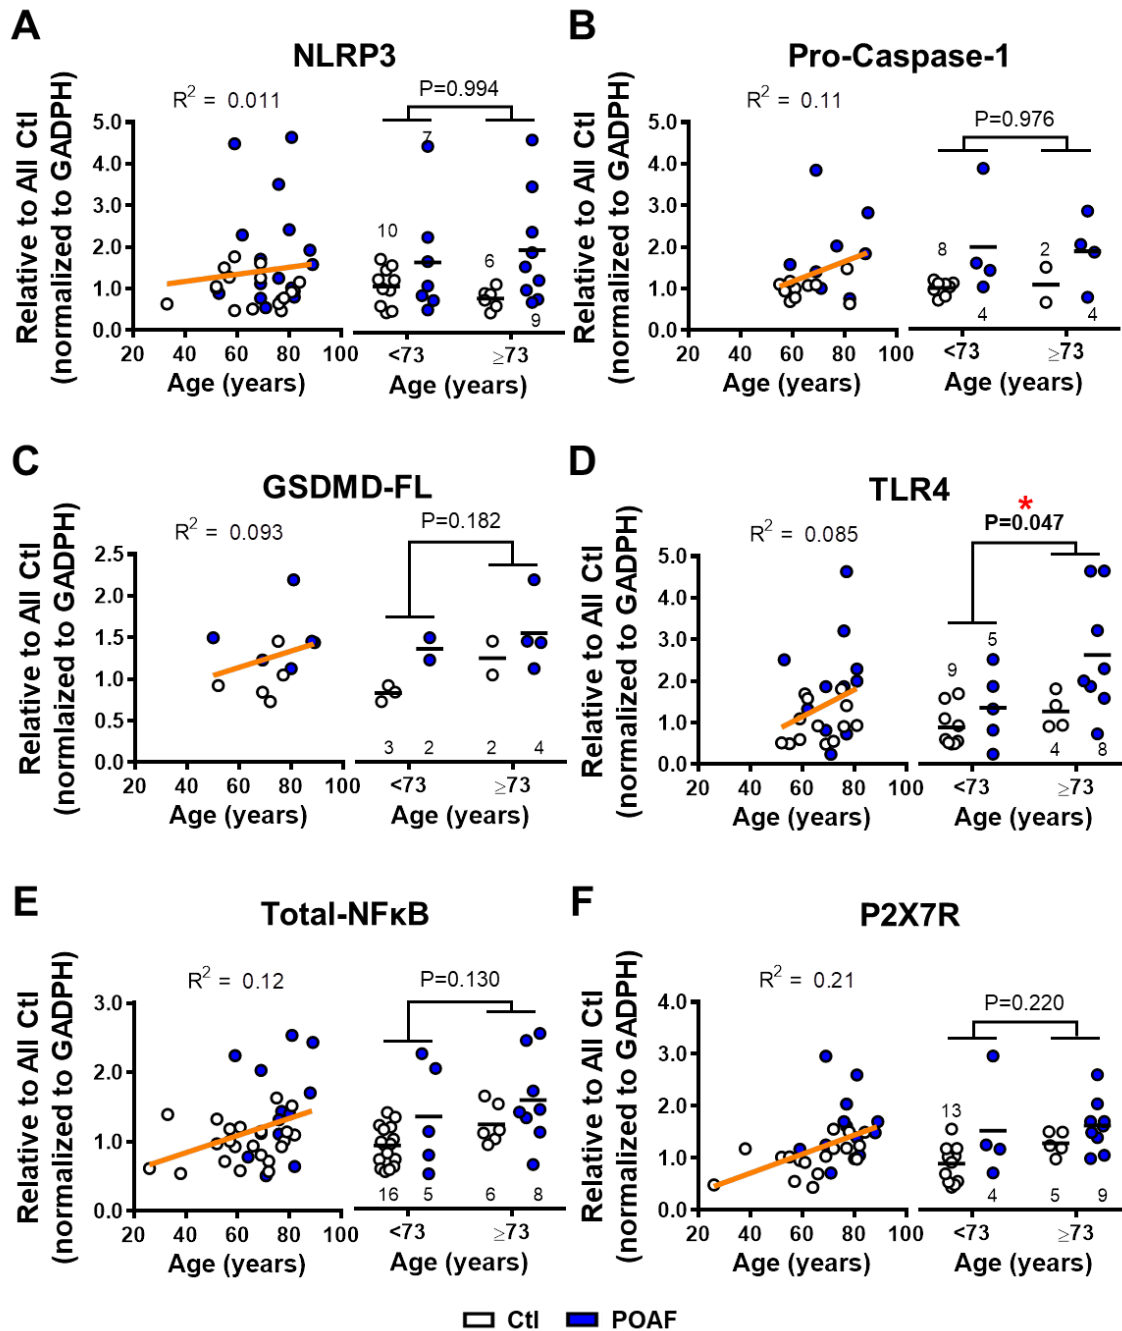

585 Online Figure XXIV. Age and rhythm dependence of atrial NACHT, LRR, and PYD domains containing protein-3 (NLRP3) inflammasome parameters. Correlation between parameter value and age, with corresponding correlation coefficients ( $R^2$ ; left) and parameter values in Ctl and POAF patients <73 years vs.  $\geq 73$  years (right). **A**, NLRP3 protein levels. **B**, Pro-caspase1 protein levels. **C**, Full-length gasdermin-D (GSDMD-FL) protein levels. **D**, Toll-like receptor-4 protein levels. **E**, Total nuclear factor kappa-light-chain-enhancer of activated B cells (NFκB) protein levels. **F**, purinergic P2X7 receptor (P2X7R) protein levels. Numbers above or below symbols indicate number of patients. \* $P < 0.05$  for the factor 'age' based on two-way ANOVA. Note that individual subgroups may be small, limiting the statistical power and robustness of these subanalyses.

590

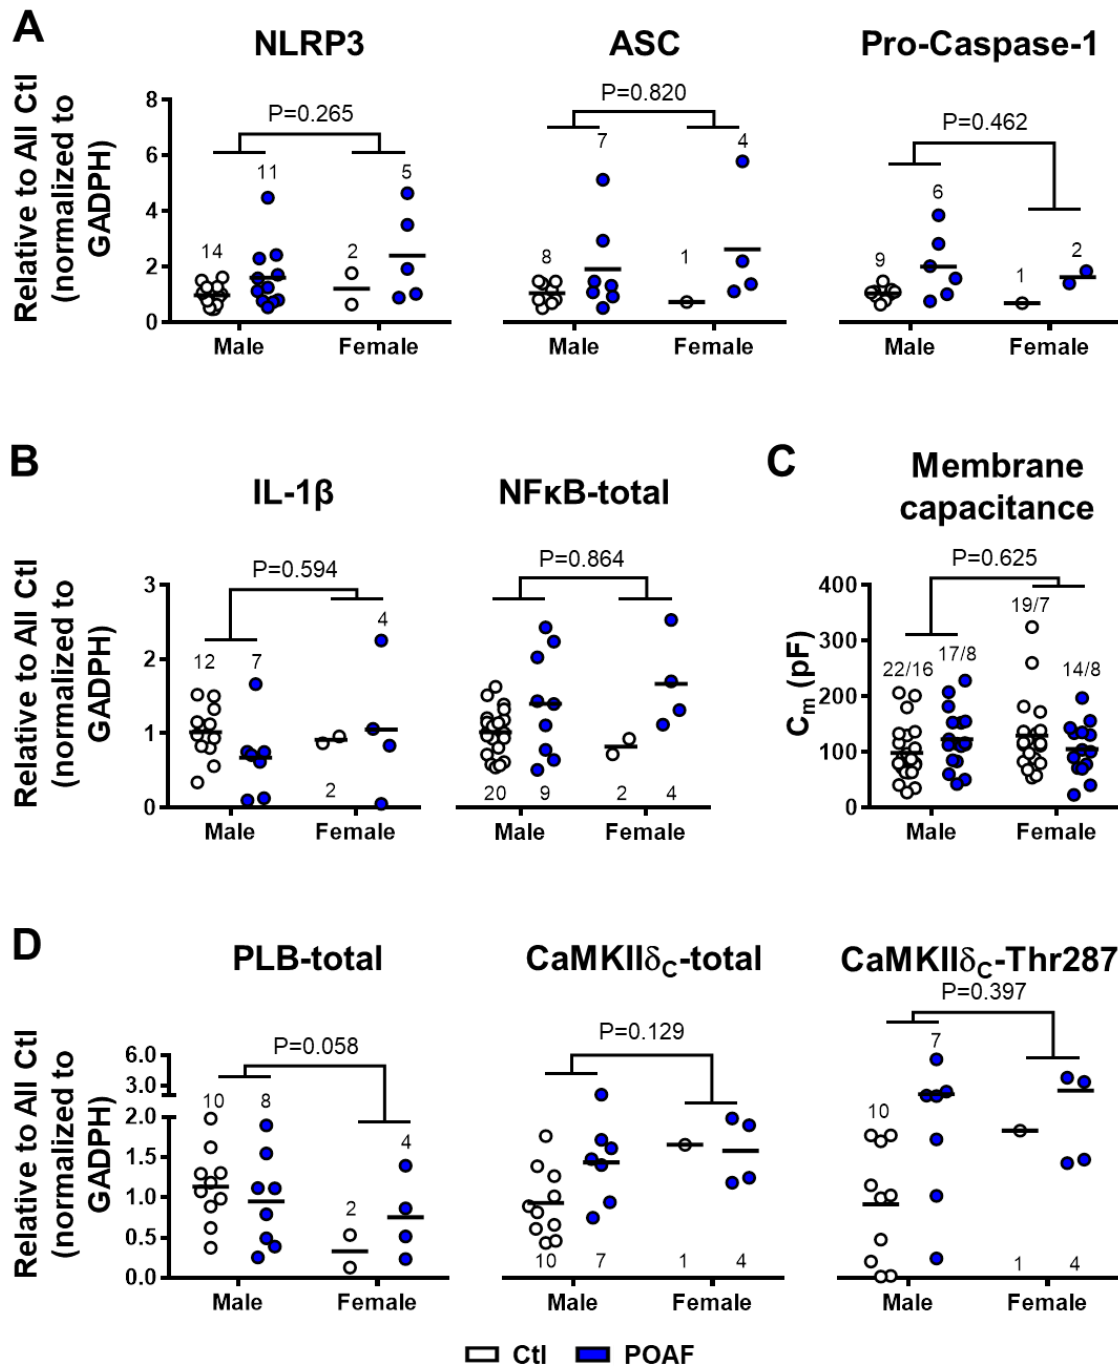

595 **Online Figure XXV. Relationship between sex and NLRP3 inflammasome activation or**  
**Ca<sup>2+</sup>-handling changes. A-D,** Two-way ANOVA analysis of post-operative rhythm status  
and sex (male vs. female) for NACHT, LRR, and PYD domains containing protein 3  
(NLRP3), apoptosis-associated speck-like protein containing a CARD (ASC) and pro-  
600 Caspase-1 (panel A), interleukin-1 $\beta$  (IL-1 $\beta$ ) and total nuclear factor kappa-B (NF $\kappa$ B, panel  
B), cardiomyocyte membrane capacitance ( $C_m$ , panel C), and total phospholamban (PLB) or  
total/Thr287-phosphorylated Ca<sup>2+</sup>/calmodulin-dependent protein kinase-II $\delta_C$  (CaMKII $\delta_C$ , panel  
D) protein levels. P values reflect significance level of the factor 'sex' in two-way ANOVA.  
Note that individual subgroups may be small, limiting the statistical power and robustness of  
these subanalyses.

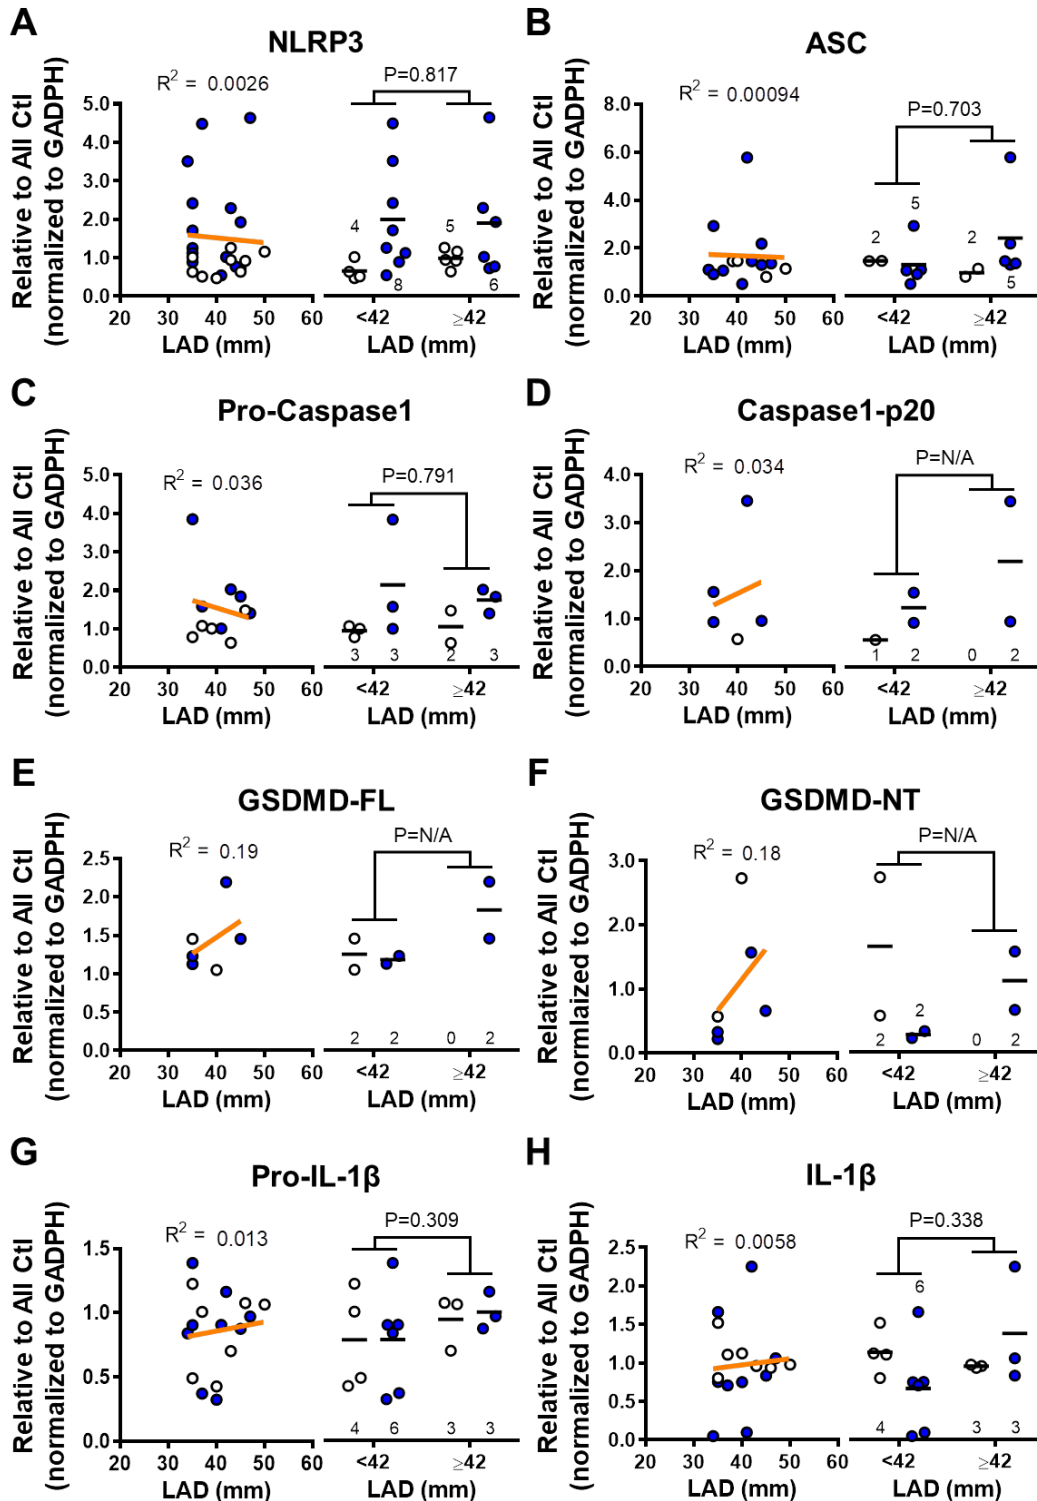

605

**Online Figure XXVI. Relationship between left atrial diameter (LAD) and NLRP3-inflammasome protein levels.** Left panels show correlation between LAD and protein levels of NLRP3-inflammasome components/products. Right panels show two-way ANOVA analysis of post-operative rhythm and LAD (with a threshold of 42 mm). P values reflect significance level of the factor 'LAD'. N-numbers indicate number of patients. \* $P < 0.05$ . **A**, NACHT, LRR, and PYD domains containing protein 3 (NLRP3). **B**, Apoptosis-associated speck-like protein containing a CARD (ASC). **C-D**, Pro-Caspase-1 (C) and its active 20 kDa fragment (D). **E-F**, Full-length (E) and pore-forming N-terminal (F) gasdermin-D (GSDMD). **G-H**, (Pro-)interleukin-1 $\beta$  (IL-1 $\beta$ ). Note that individual subgroups may be small, limiting the statistical power and robustness of these subanalyses.

610

615

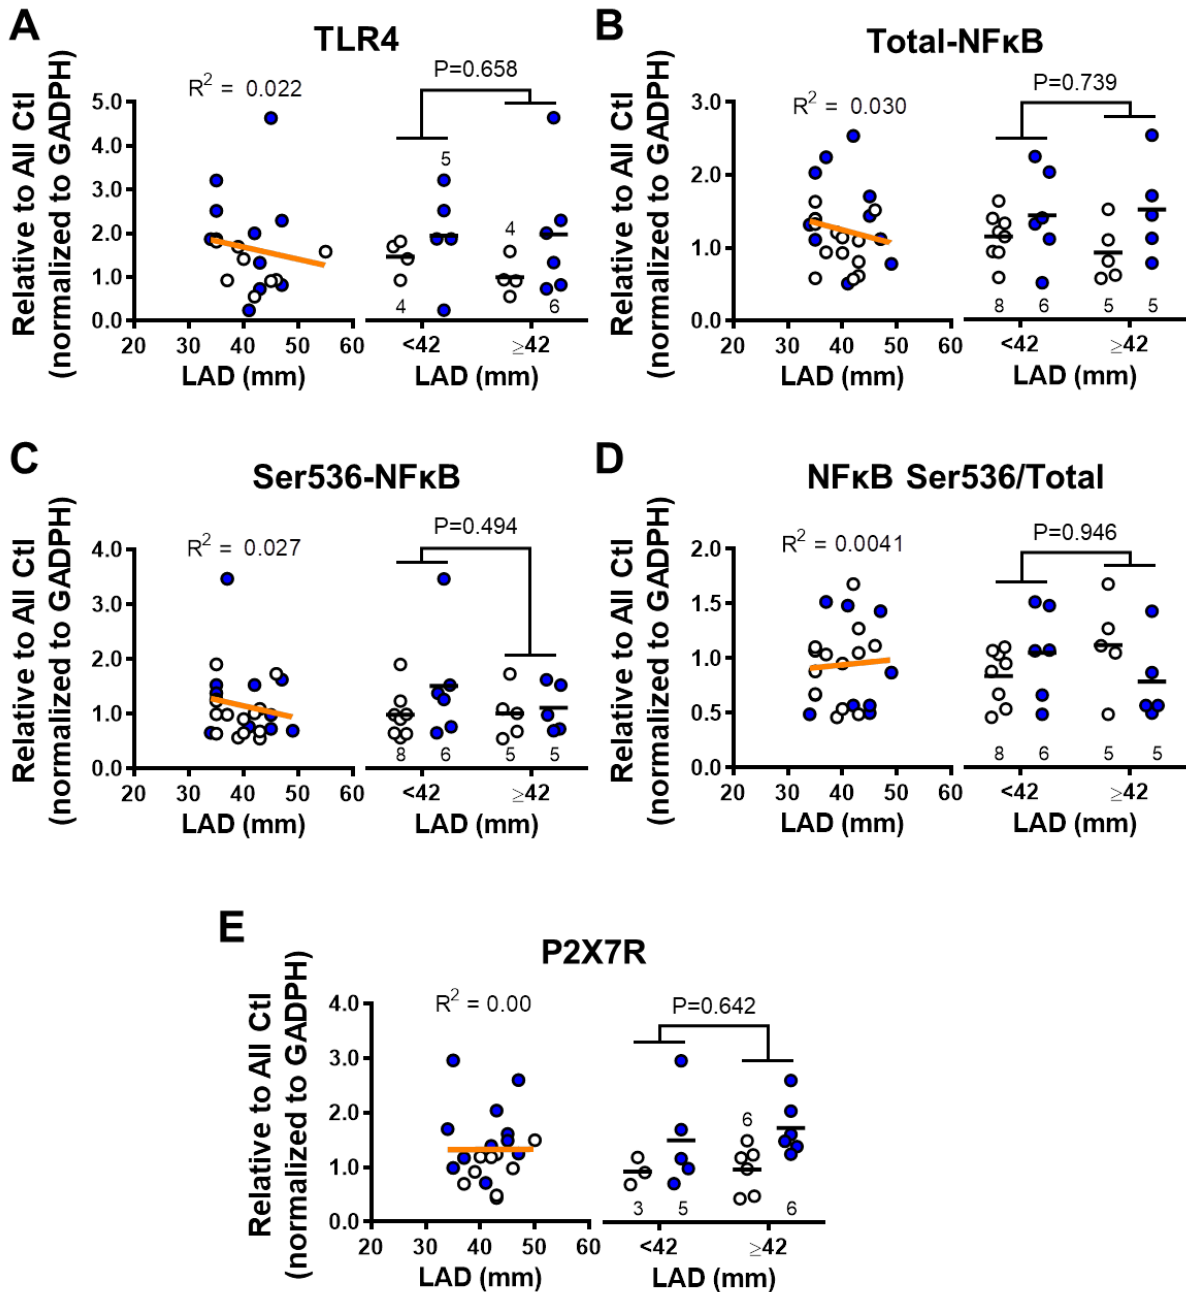

620 **Online Figure XXVII. Relationship between left atrial diameter (LAD) and components involved in priming and triggering of the NLRP3-inflammasome.** Left panels show correlation between LAD and individual parameters. Right panels show two-way ANOVA analysis of post-operative rhythm and LAD (with a threshold of 42 mm). P values reflect significance level of the factor 'LAD'. P values reflect significance level of the factor 'LAD'. N-numbers indicate number of patients. \* $P<0.05$ . **A**, Toll-like receptor-4 protein levels. **B-D**, Total (B), Ser536-phosphorylated (C) and relative (phosphorylated / total, D) nuclear factor kappa-B protein levels. **E**, P2X7 receptor protein levels. Note that individual subgroups may be small, limiting the statistical power and robustness of these subanalyses.

625

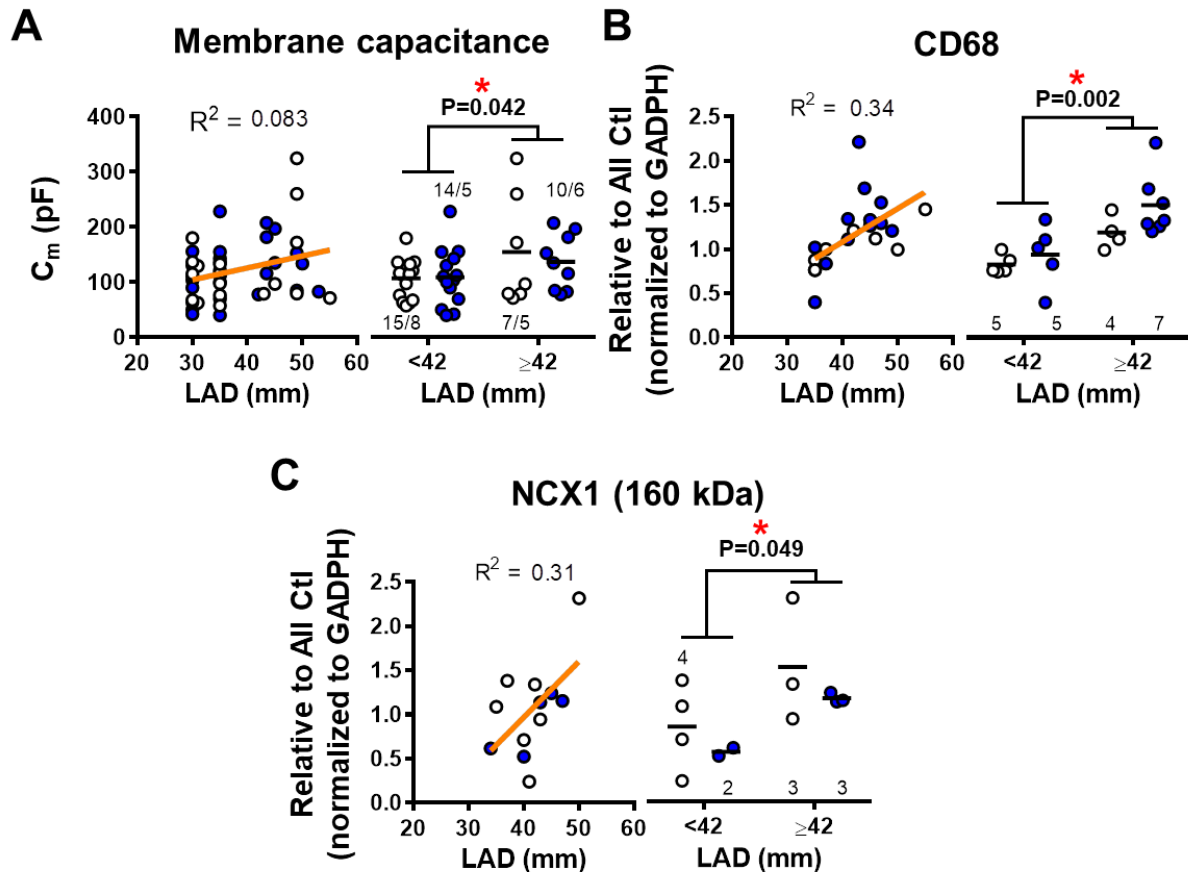

630 **Online Figure XXVIII. Parameters correlating with left atrial diameter (LAD).** Left panels  
 show correlation between LAD and individual parameters. Right panels show two-way  
 ANOVA analysis of post-operative rhythm and LAD (with a threshold of 42 mm). P values  
 reflect significance level of the factor 'LAD'. \* $P<0.05$ . **A**, Cardiomyocyte membrane  
 capacitance ( $C_m$ ). **B**, Macrophage marker CD68. **C**, Full-length (160 kDa) variant of the  
 $\text{Na}^+/\text{Ca}^{2+}$ -exchanger type-1 (NCX1). N-numbers indicate cells/patients (panel A), or patients  
 635 (panels B-C). Note that individual subgroups may be small, limiting the statistical power and  
 robustness of these subanalyses.

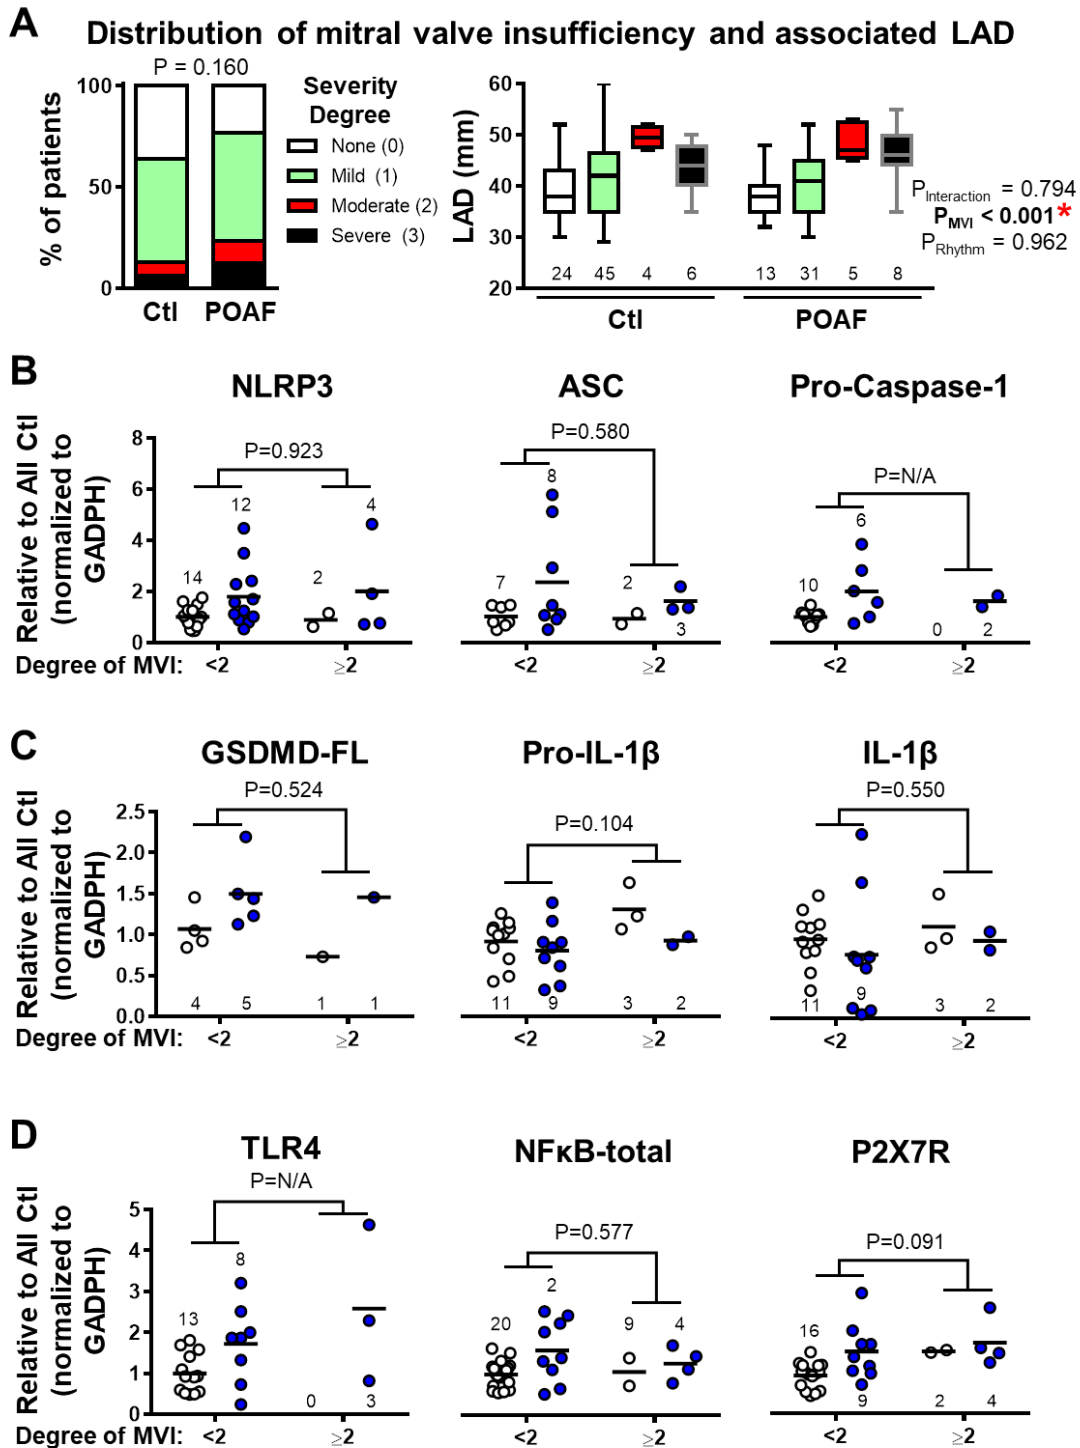

640 **Online Figure XXIX. Relationship between mitral valve insufficiency (MVI) and NLRP3**  
 645 **inflammasome activation. A**, Distribution of the degree of MVI in Ctl (n=114) and POAF (n=73) and association between MVI (Left-to-right: none, mild, moderate or severe) and LAD. Numbers below indicate number of patients in each category for whom LAD was available. **B-D**, Two-way ANOVA analysis of post-operative rhythm status and MVI (none/mild vs. moderate/severe) for NACHT, LRR, and PYD domains containing protein 3 (NLRP3), apoptosis-associated speck-like protein containing a CARD (ASC) and pro-Caspase-1 (panel **B**), full-length gasdermin-D, pro-interleukin-1 $\beta$  and interleukin-1 $\beta$  (panel **C**), toll-like receptor-4 (TLR4), total nuclear factor kappa-B and P2X7 receptor (panel **D**) protein levels. P values reflect significance level of the factor 'MVI' in two-way ANOVA. Note that individual subgroups may be small, limiting the statistical power and robustness of these subanalyses.



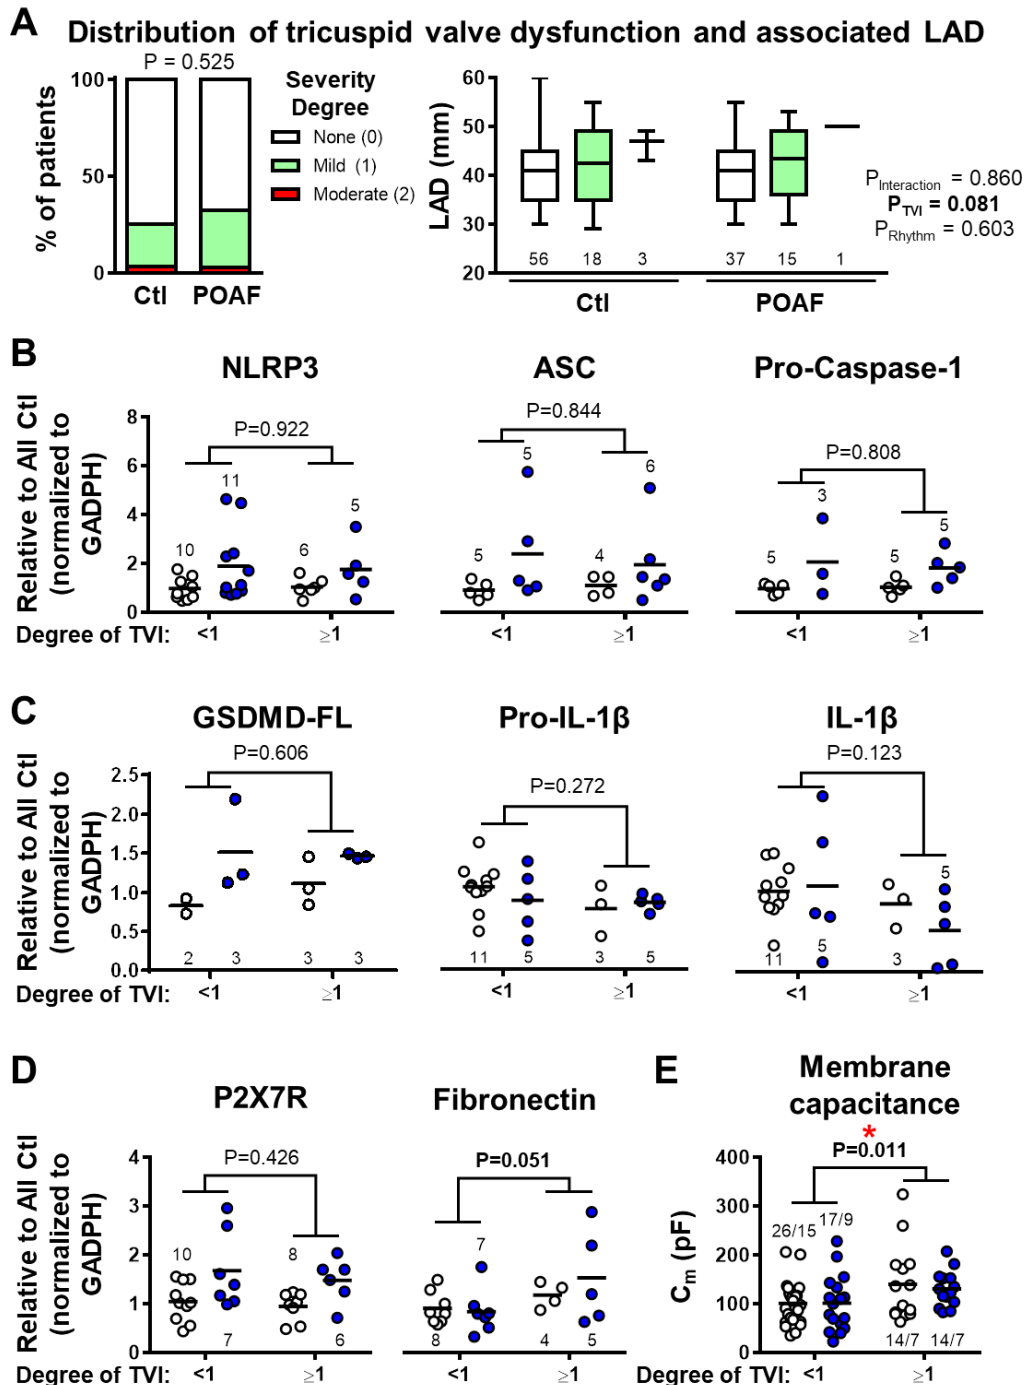

650

655

660

**Online Figure XXX. Relationship between tricuspid valve insufficiency (TVI) and NLRP3 inflammasome activation.** **A**, Distribution of the degree of TVI in Ctl (n=111) and POAF (n=65) and association between TVI (Left-to-right: none, mild or moderate) and LAD. Numbers below indicate number of patients in each category for whom LAD was available. **B-D**, Two-way ANOVA analysis of post-operative rhythm status and TVI (none vs. mild/moderate) for NACHT, LRR, and PYD domains containing protein 3 (NLRP3), apoptosis-associated speck-like protein containing a CARD (ASC), and pro-Caspase-1 (panel **B**), full-length gasdermin-D, pro-interleukin-1 $\beta$  and interleukin-1 $\beta$  (panel **C**), as well as P2X7 receptor and fibronectin protein levels (panel **D**). **E**, Two-way ANOVA analysis of post-operative rhythm status and TVI (none vs. mild/moderate) for cardiomyocyte membrane capacitance ( $C_m$ ). N-numbers indicate number of cells/patients (panel **E**) or patients (other panels). P values reflect significance level of the factor 'TVI' in two-way ANOVA. Note that individual subgroups may be small, limiting the statistical power and robustness of these subanalyses.

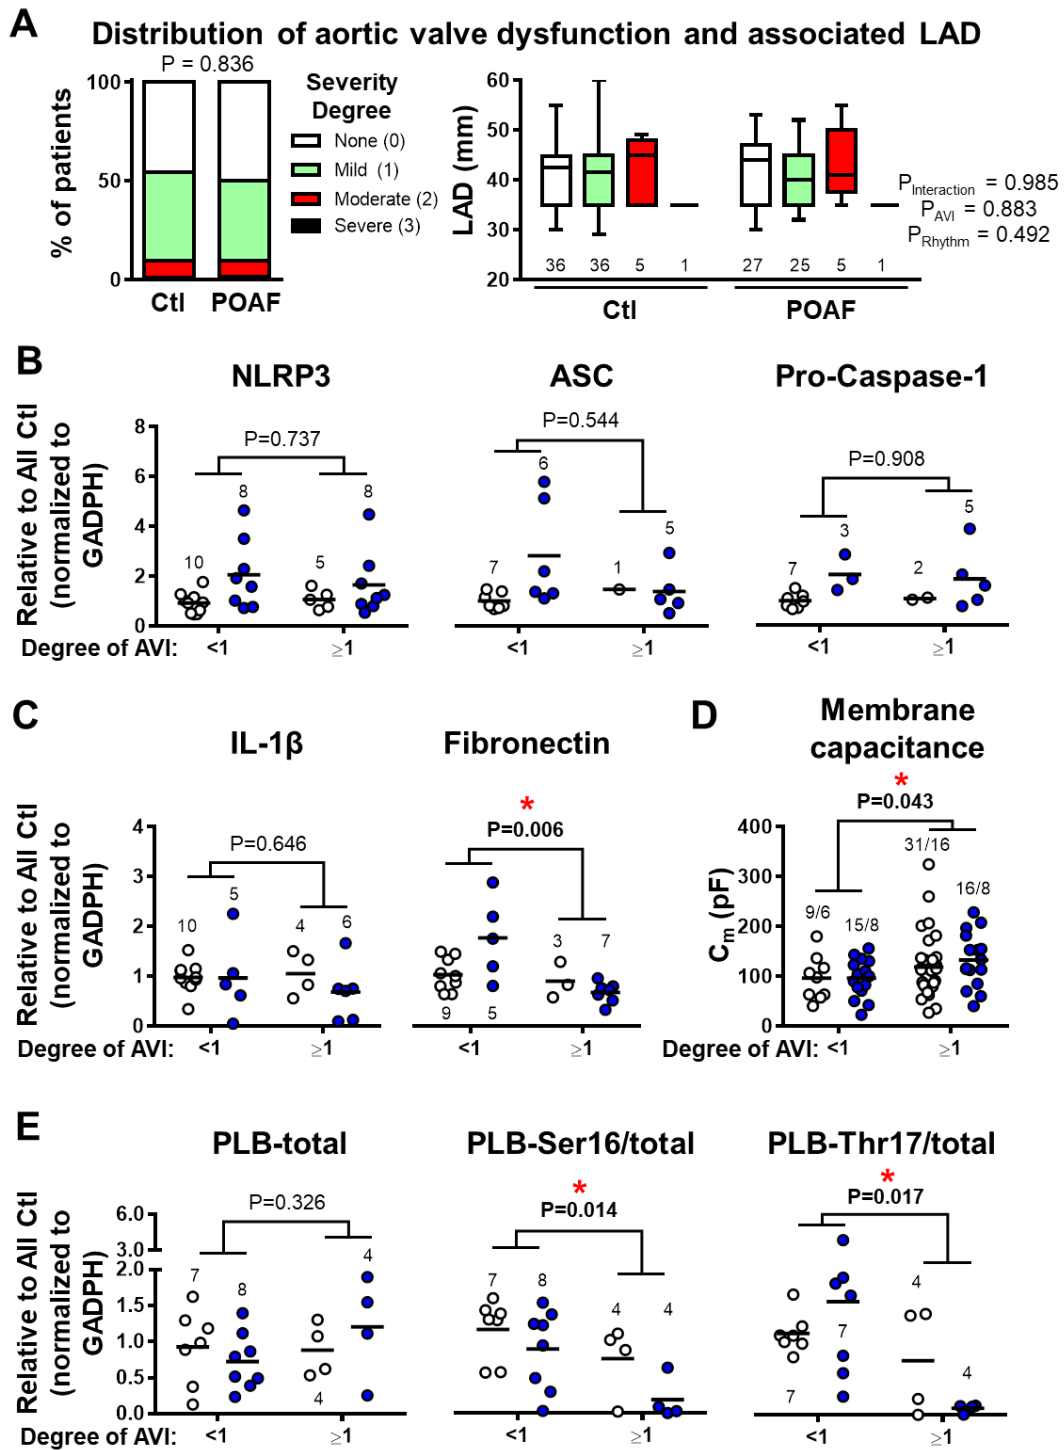

665

**Online Figure XXXI. Relationship between aortic insufficiency (AVI) and NLRP3 inflammasome activation.** **A**, Distribution of the degree of AVI in Ctl (n=116) and POAF (n=74) and association between AVI (Left-to-right: none, mild, moderate or severe) and LAD. Numbers below indicate number of patients in each category for whom LAD was available. **B-E**, Two-way ANOVA analysis of post-operative rhythm status and AVI (none vs. mild/moderate/severe) for NACHT, LRR, and PYD domains containing protein 3 (NLRP3), apoptosis-associated speck-like protein containing a CARD (ASC), and pro-Caspase-1 (panel **B**), interleukin-1 $\beta$  (IL-1 $\beta$ ) and fibronectin (panel **C**), membrane capacitance ( $C_m$ ; **D**), and total, Ser16-phosphorylated, or Thr17-phosphorylated phospholamban (PLB; panel **E**). N-numbers indicate number of cells/patients (panel **D**) or patients (other panels). P values reflect significance level of the factor 'AVI' in two-way ANOVA. Note that individual subgroups may be small, limiting the statistical power and robustness of these subanalyses.

670

675

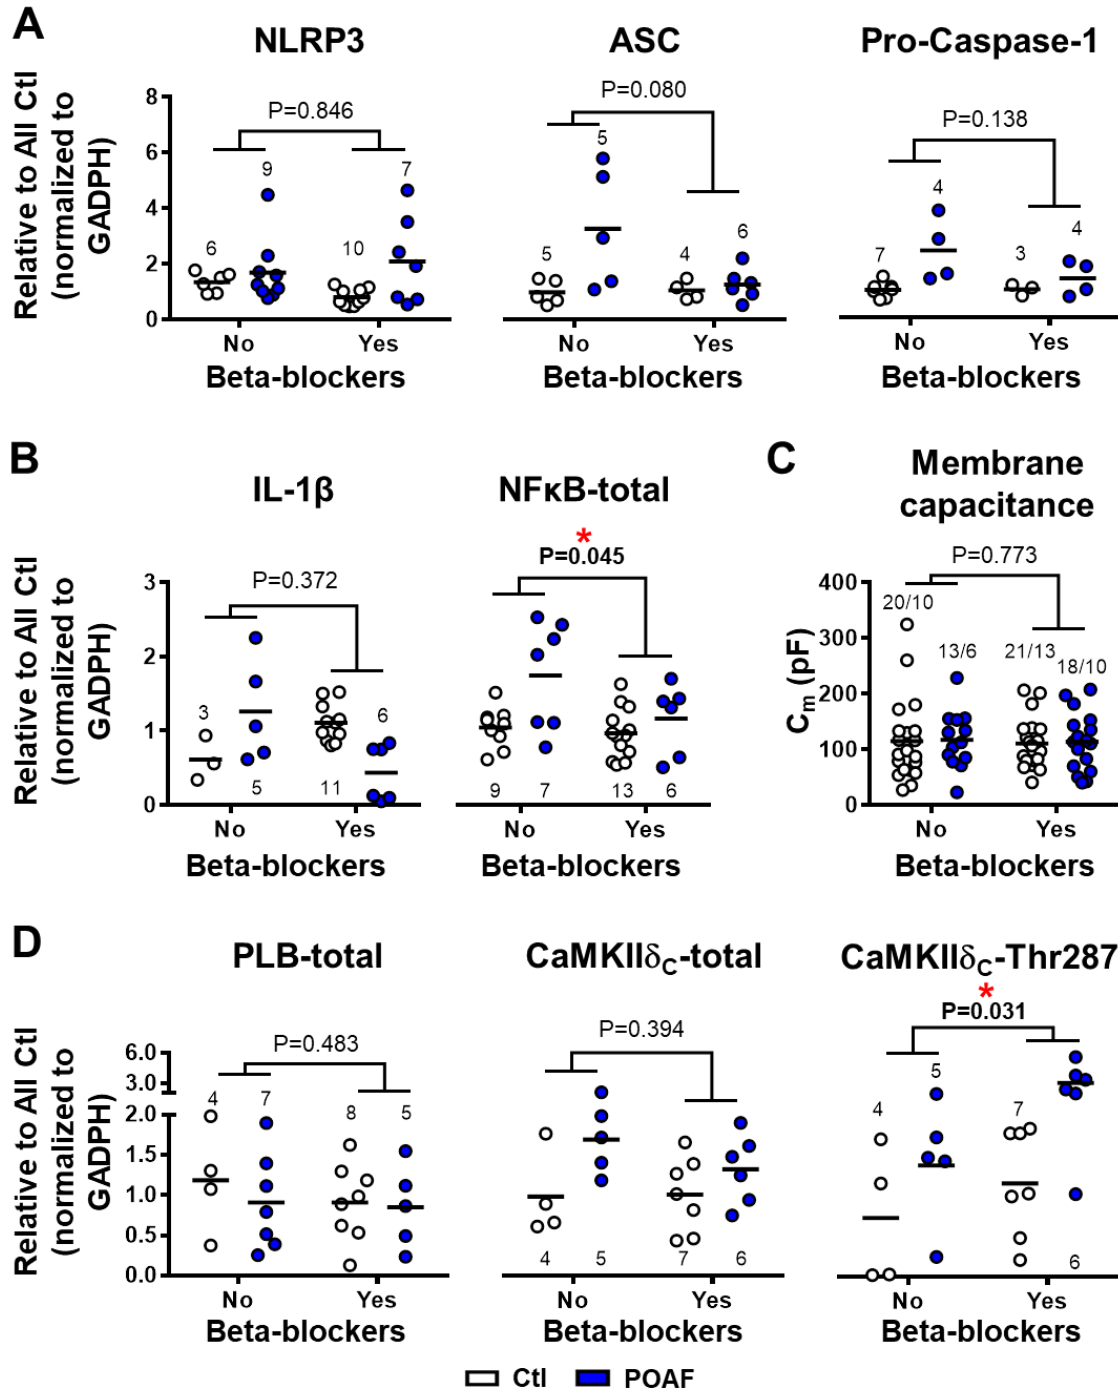

680 **Online Figure XXXII. Relationship between beta-blocker use and NLRP3 inflammasome activation or Ca<sup>2+</sup>-handling changes. A-D,** Two-way ANOVA analysis of post-operative rhythm status and beta-blocker use (no vs. yes) for NACHT, LRR, and PYD domains containing protein 3 (NLRP3), apoptosis-associated speck-like protein containing a CARD (ASC) and pro-Caspase-1 (panel A), interleukin-1 $\beta$  (IL-1 $\beta$ ) and total nuclear factor kappa-B (NF $\kappa$ B, panel B), cardiomyocyte membrane capacitance ( $C_m$ , panel C), and total phospholamban (PLB) or total/Thr287-phosphorylated Ca<sup>2+</sup>/calmodulin-dependent protein kinase-II $\delta_C$  (CaMKII $\delta_C$ , panel D) protein levels. P values reflect significance level of the factor 'beta-blockers' in two-way ANOVA. Note that individual subgroups may be small, limiting the statistical power and robustness of these subanalyses.

690

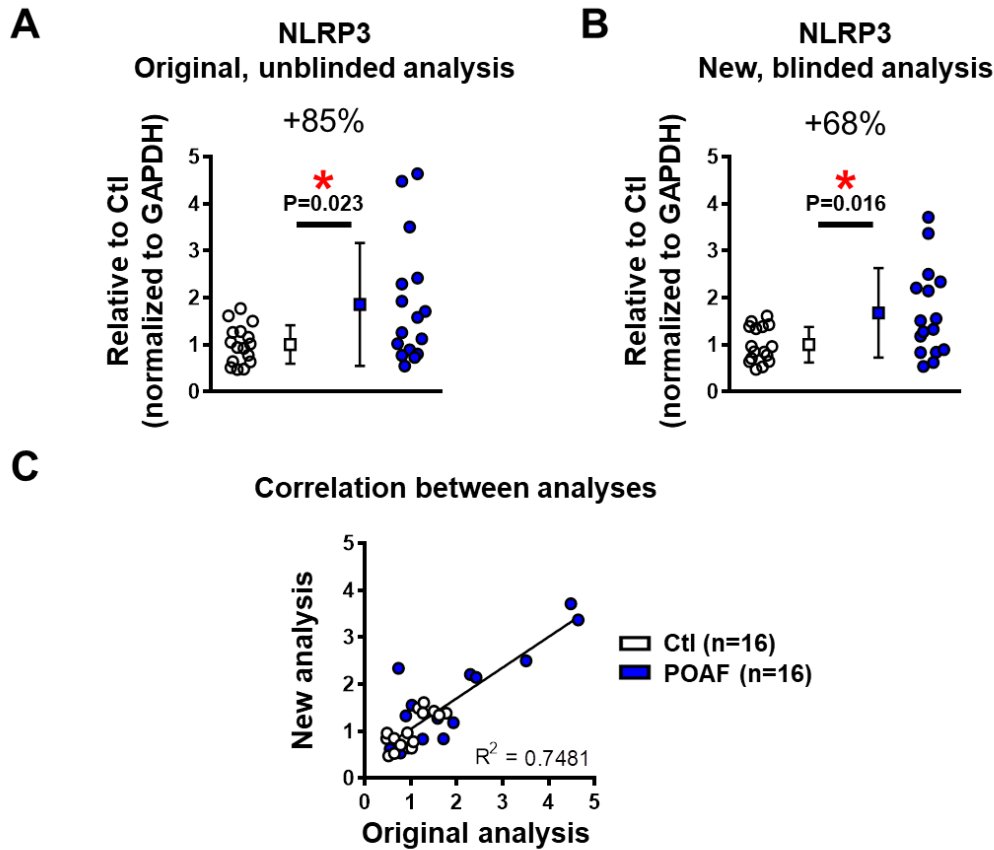

**D**

| Protein                              | n-numbers | POAF vs. Ctl<br>Original,<br>unblinded<br>analysis | POAF vs. Ctl<br>New, blinded<br>analysis | Correlation<br>coefficient      |
|--------------------------------------|-----------|----------------------------------------------------|------------------------------------------|---------------------------------|
| NLRP3 (tissue)                       | 16 vs. 16 | +85% (P=0.023)                                     | +68% (P=0.016)                           | 0.748                           |
| Pro-Casp1 (CMs)                      | 15 vs. 15 | +159% (P=0.006)                                    | +205% (P=0.024)                          | 0.898                           |
| Casp1-p37 (CMs)                      | 15 vs. 15 | +311% (P<0.001)                                    | +464% (P=0.008)                          | 0.837                           |
| GSDMD-FL (tissue)                    | 5 vs. 6   | +49% (P=0.030)                                     | +27% (P=0.144)                           | 0.626                           |
| GSDMD-FL (CMs)                       | 12 vs. 9  | +140% (P=0.041)                                    | +142% (P=0.032)                          | 0.748                           |
| GSDMD-NT (CMs)                       | 12 vs. 9  | +298% (P=0.008)                                    | +294% (P=0.002)                          | 0.676                           |
| P2X7R (tissue)                       | 18 vs. 13 | +59% (P=0.008)                                     | +60% (P=0.011)                           | 0.793                           |
| RyR2-total (tissue)                  | 11 vs. 12 | +4% (P=0.884)                                      | +2% (P=0.950)                            | 0.988                           |
| RyR2-S2814/tot (tissue)              | 11 vs. 12 | +31% (P=0.040)                                     | +36% (P=0.019)                           | 0.969                           |
| CaMKII $\delta$ -tot (tissue)        | 11 vs. 11 | +49% (P=0.019)                                     | +47% (P=0.070)                           | 0.527                           |
| CaMKII $\delta$ -Thr287/tot (tissue) | 11 vs. 11 | +60% (P=0.166)                                     | +42% (P=0.264)                           | 0.769                           |
|                                      |           |                                                    | <b>Average</b>                           | <b>0.78<math>\pm</math>0.14</b> |

Online Figure XXXIII. Comparison between the original unblinded Western blot analysis and the independent re-analysis blinded to postoperative rhythm outcome performed during the revision. **A-B.** Quantification of NLRP3 proteins levels in human atrial whole-tissue homogenates of Ctl (white symbols) and POAF (blue symbols) patients during the original unblinded analysis (**A**) and the new analysis blinded to post-operative rhythm outcome (**B**). \*P<0.05 vs. Ctl based on Student's *t*-test with Welch's correction for unequal variance. **C.** Correlation between relative NLRP3 protein levels from both analyses for individual Ctl and POAF samples. **D.** Overview of n-numbers, relative differences between POAF and Ctl in the original, unblinded analysis and in the new, blinded analysis, as well as correlation coefficients between the original and new analyses, for different Western blot results.

695

700
